# Supplementary material
Source: PubMed Central journal article supplement (PMC6202681)

# Supporting Information for

## Stereoselective Synthesis of 1-Tuberculosinyl Adenosine; a virulence factor of *Mycobacterium tuberculosis*

Jeffrey Buter, Dorus Heijnen,<sup>Δ</sup> Ieng Chim Wan,<sup>Δ</sup> F. Matthias Bickelhaupt, David C. Young, Edwin Otten, D. Branch Moody and Adriaan J. Minnaard\*

### Table of contents

|    |                                                        |     |
|----|--------------------------------------------------------|-----|
| 1. | General remarks                                        | S2  |
| 2. | X-ray crystallography details                          | S3  |
| 3. | CID/MS analysis of 2'-deoxy 1-tuberculosinyl adenosine | S5  |
| 4. | Computational studies of the Diels-Alder cycloaddition | S9  |
| 5. | NMR spectra and chromatograms                          | S39 |

## General remarks:

All reactions were performed using oven-dried glassware under an atmosphere of nitrogen (unless otherwise specified) by standard Schlenk techniques, using dry solvents. Reaction temperature refers to the temperature of the oil bath/cooling bath. Solvents were taken from a solvent purification system. All other reagents were purchased and used without further purification unless noted otherwise. The adenosine, fully  $^{13}\text{C}$  labelled on the ribose, was purchased from Omicron biochemicals.

TLC analysis was performed on silica gel 60/Kieselguhr F254, 0.25 mm. Compounds were visualized using either Seebach's reagent (a mixture of phosphomolybdic acid (25 g), cerium (IV) sulfate (7.5 g),  $\text{H}_2\text{O}$  (500 mL) and  $\text{H}_2\text{SO}_4$  (25 mL)), a  $\text{KMnO}_4$  stain ( $\text{K}_2\text{CO}_3$  (40 g),  $\text{KMnO}_4$  (6 g),  $\text{H}_2\text{O}$  (600 mL) and 10%  $\text{NaOH}$  (5 mL)), or elemental iodine.

Flash chromatography was performed using silica gel type SiliaFlash P60 (230 – 400 mesh) or with automated column chromatography.

$^1\text{H}$ - and  $^{13}\text{C}$ -NMR spectra were recorded at 400 and 100.59 MHz, respectively, using  $\text{CDCl}_3$  or  $\text{CD}_3\text{OD}$  as the solvent. Chemical shift values are reported in ppm with the solvent resonance as the internal standard ( $\text{CDCl}_3$ :  $\delta$  7.26 for  $^1\text{H}$ ,  $\delta$  77.2 for  $^{13}\text{C}$ ,  $\text{MeOH-}d_4$   $\delta$  3.3 for  $^1\text{H}$ ,  $\delta$  49.0 for  $^{13}\text{C}$ ). Data are reported as follows: chemical shifts ( $\delta$ ), multiplicity (s = singlet, d = doublet, dd = double doublet, ddd = double double doublet, ddp = double double pentet, td = triple doublet, t = triplet, q = quartet, b = broad, m = multiplet), coupling constants  $J$  (Hz), and integration.

GC-MS measurements were performed with a gas chromatography system equipped with a mass sensitive detector. GC measurements were performed with a an AT5 column and FID detection

Enantiomeric excesses were determined by chiral HPLC analysis equipped with a diode-array detector. Integration at three different wavelengths (254, 225, 190 nm) was performed and the reported enantiomeric excess is an average of the three integrations. Retention times (tR) are given in min.

High resolution mass spectra (HRMS) were recorded on a Orbitrap XL. Optical rotations were measured on a polarimeter with a 10 cm cell (c given in g/mL) at ambient temperature ( $\pm 23$  °C). Melting points were recorded in °C.

## X-ray crystallography:

A single crystal of Diels-Alder adduct **3** was mounted on top of a cryoloop and transferred into the cold nitrogen stream (100 K) of a Bruker-AXS D8 Venture diffractometer. Data collection and reduction was done using the Bruker software suite APEX2.<sup>1</sup> The final unit cell was obtained from the xyz centroids of 8708 reflections after integration. A multiscan absorption correction was applied, based on the intensities of symmetry-related reflections measured at different angular settings (SADABS). The structures were solved by direct methods using SHELXS.<sup>2</sup> The structure was solved in the chiral space group P2(1), and subsequent refinement allowed the location of all heavy atom positions. The hydrogen atoms were generated by geometrical considerations, constrained to idealized geometries and allowed to ride on their carrier atoms with an isotropic displacement parameter related to the equivalent displacement parameter of their carrier atoms. In the absence of significant anomalous scattering, the reflection data do not provide information on the stereochemistry of the molecule: the model chosen is based on the known configuration (S at C18) of the chiral auxiliary used in the synthesis. Crystal data and details on data collection and refinement are presented in Table 1.

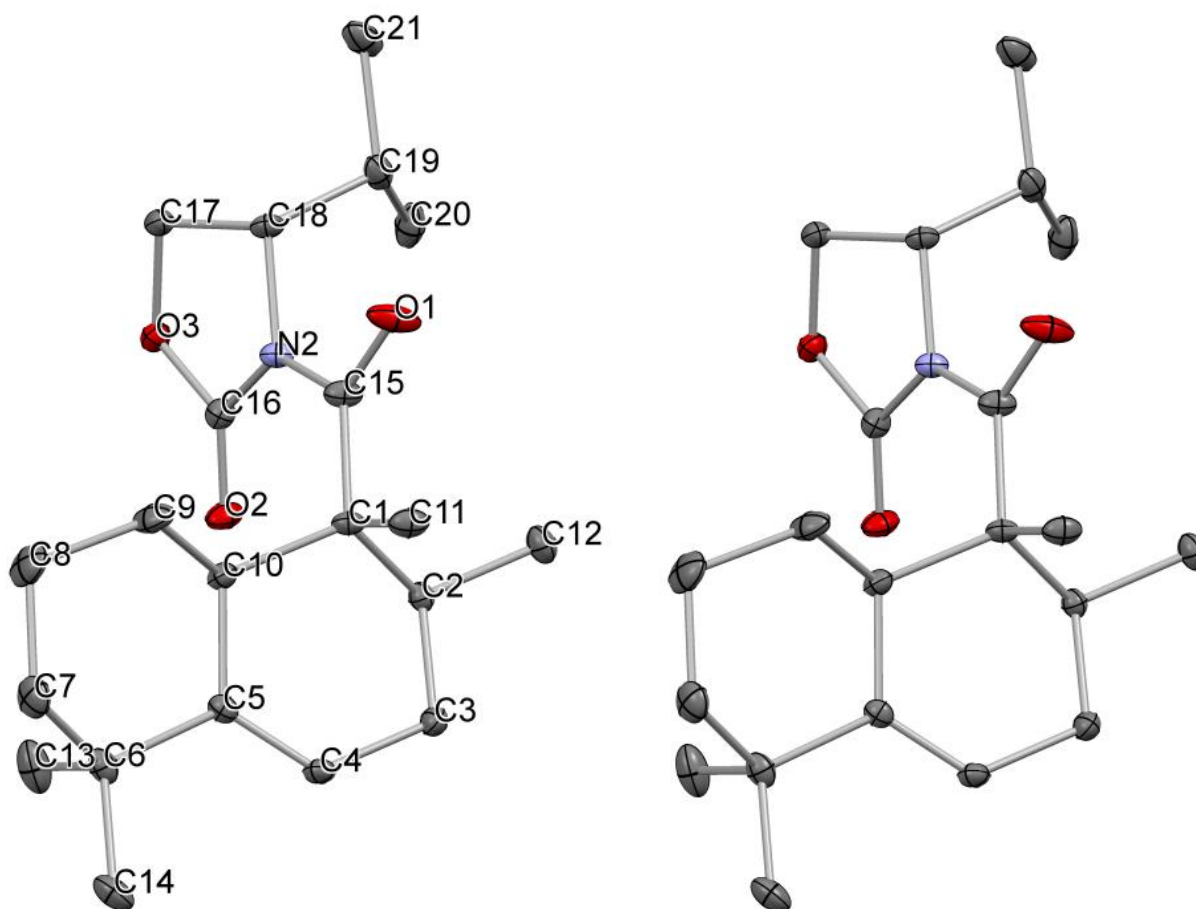

**X-ray structure of Diels-Alder adduct 3:** Ellipsoid contour percent probability level = 50% probability

<sup>1</sup> Bruker, (2012). APEX2 (v2012.4-3), SAINT (Version 8.18C) and SADABS (Version 2012/1). Bruker AXS Inc., Madison, Wisconsin, USA. <sup>2</sup> Sheldrick, G. M. (2008). *Acta Cryst. A* **64**, 112-122

**Table 1.** Crystallographic data for Diels-Alder adduct **3**

|                                        |                                                 |                         |                                              |
|----------------------------------------|-------------------------------------------------|-------------------------|----------------------------------------------|
| chemical formula                       | C <sub>21</sub> H <sub>33</sub> NO <sub>3</sub> | F(000)                  | 380                                          |
| M <sub>r</sub>                         | 347.48                                          | temp (K)                | 100(2)                                       |
| cryst syst                             | monoclinic                                      | θ range (deg)           | 3.54 – 27.10                                 |
| color, habit                           | colorless,<br>needle                            | data collected (h,k,l)  | -13:13, -12:13, -13:13                       |
| size (mm)                              | 0.45 x 0.21 x<br>0.13                           | no. of rflns collected  | 10524                                        |
| space group                            | P2(1)                                           | no. of indepnt reflns   | 4173                                         |
| a (Å)                                  | 10.1677(6)                                      | observed reflns         | 3845 (F <sub>o</sub> ≥ 2 σ(F <sub>o</sub> )) |
| b (Å)                                  | 10.2037(5)                                      | R(F) (%)                | 4.04                                         |
| c (Å)                                  | 10.2235(6)                                      | wR(F <sup>2</sup> ) (%) | 10.07                                        |
| β, deg                                 | 111.168(2)                                      | GooF                    | 1.051                                        |
| V (Å <sup>3</sup> )                    | 989.10(10)                                      | Weighting a,b           | 0.0451, 0.2829                               |
| Z                                      | 2                                               | params refined          | 232                                          |
| ρ <sub>calc</sub> , g.cm <sup>-3</sup> | 1.167                                           | restraints              | 1                                            |
| μ(Mo Kα), cm <sup>-1</sup>             | 0.77                                            | min, max resid dens     | -0.176, 0.255                                |

## CID/MS analysis of 2'-deoxy 1-tuberculosinyl adenosine:

### Reported MS spectrum of 2'-deoxy 1-TbAd:

Reproduced from: Lau, S. K. P.; Lam, C-W.; Curreem, S. O. T.; Lee, K-C.; Lau, C. C. Y.; Chow, W-N.; Ngan, A. H. Y.; To, K. K. W.; Chan, J. F. W.; Hung, I. F. N.; Yam, W-C.; Yuen, K-Y.; Woo, P. C. Y. *Emerg. Microbes Infect.* 2015, 4, e6 (doi: 10.1038/emi.2015.6)

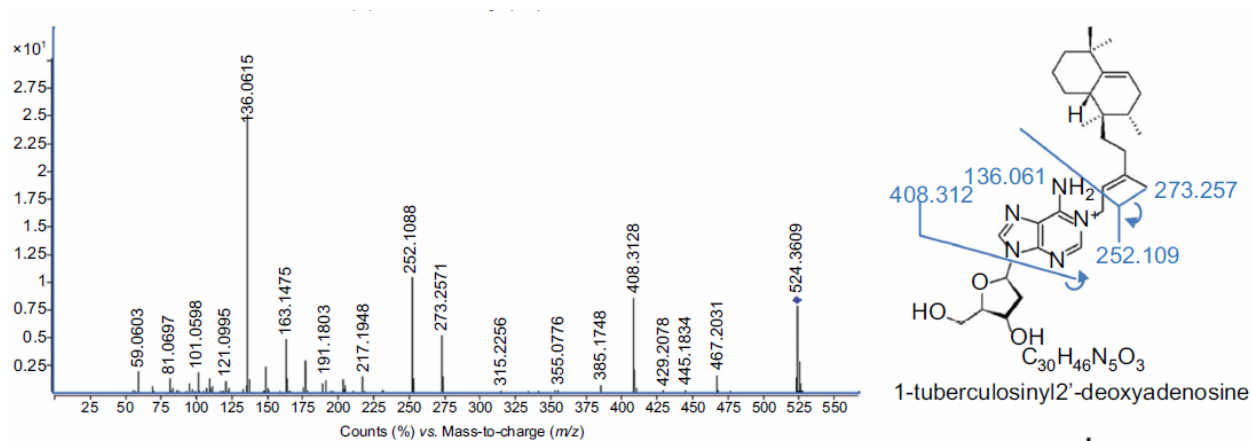

### Complete MS spectrum of synthetic 2'-deoxy 1-TbAd:

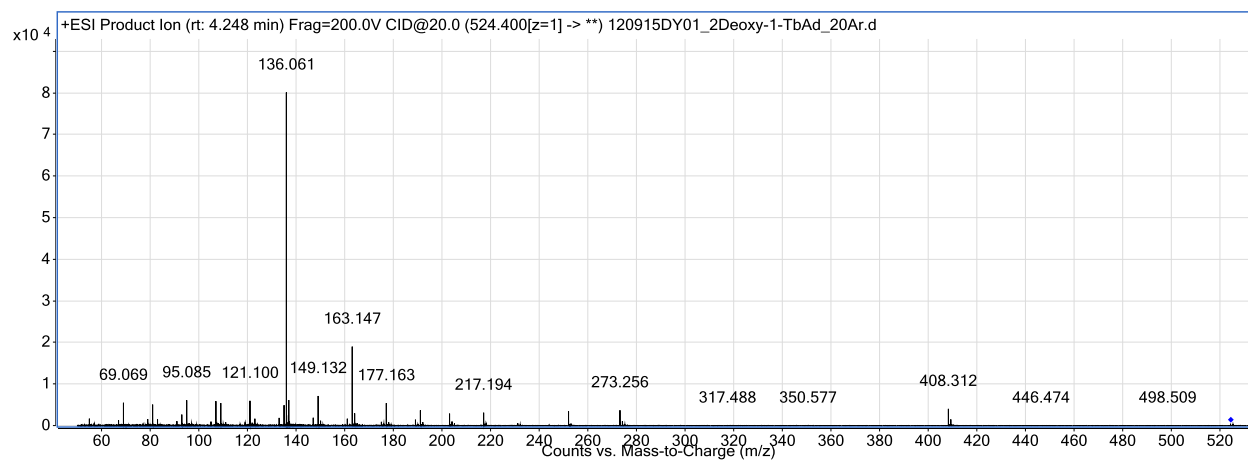

### Zoom-in of complete MS spectrum of synthetic 2'-deoxy 1-TbAd:

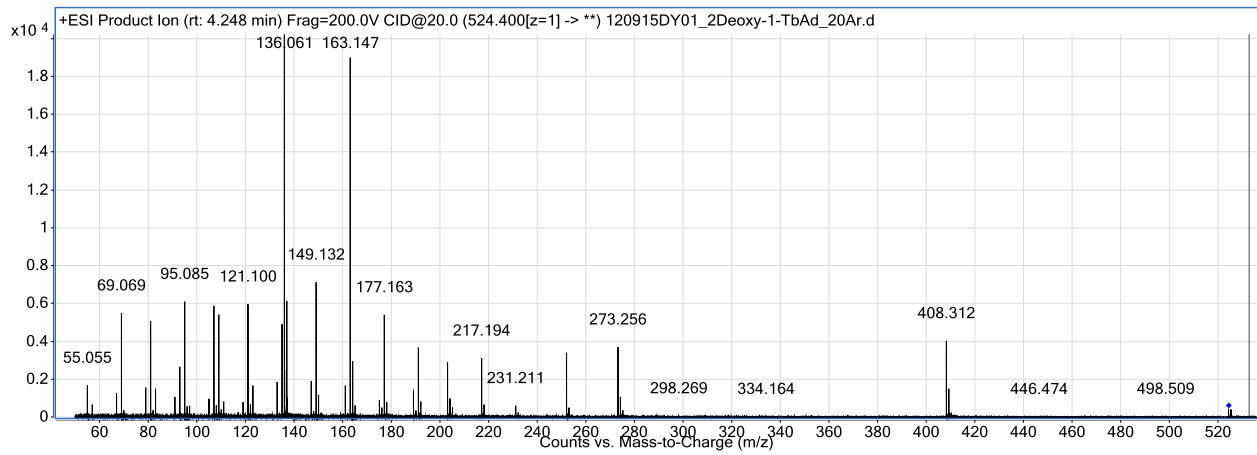

### Detailed MS spectra of synthetic 2'-deoxy 1-TbAd:

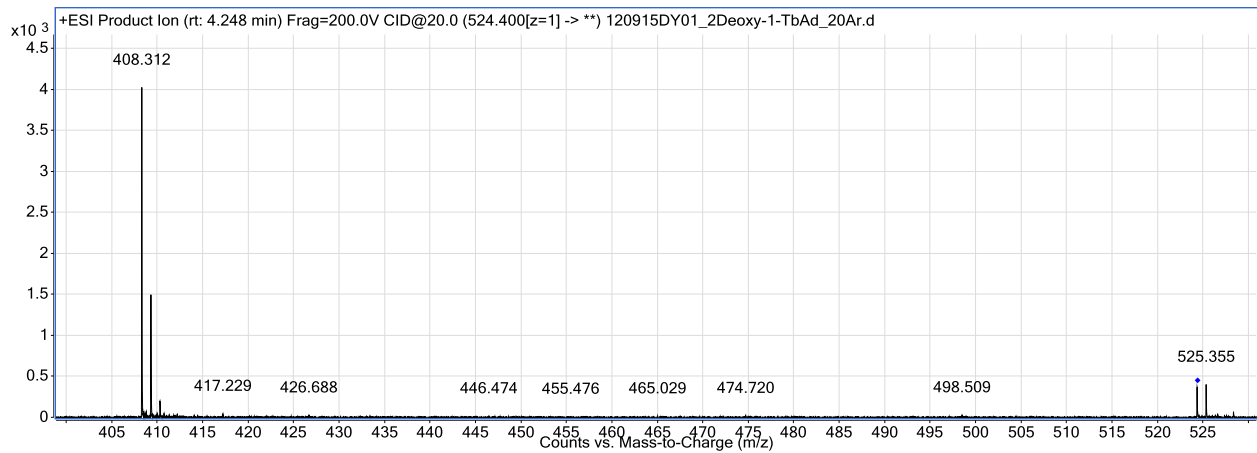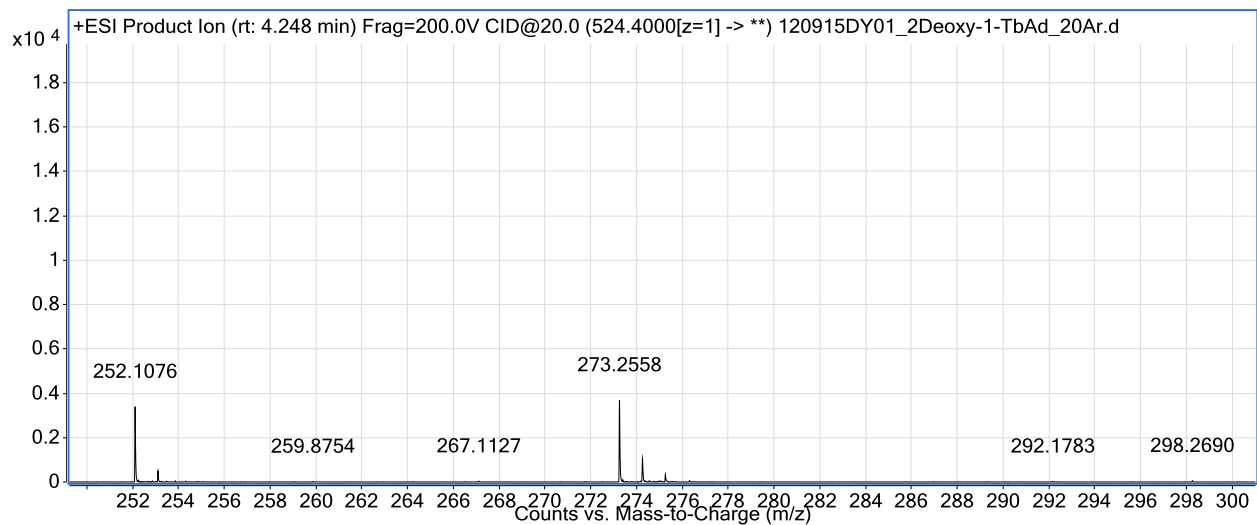

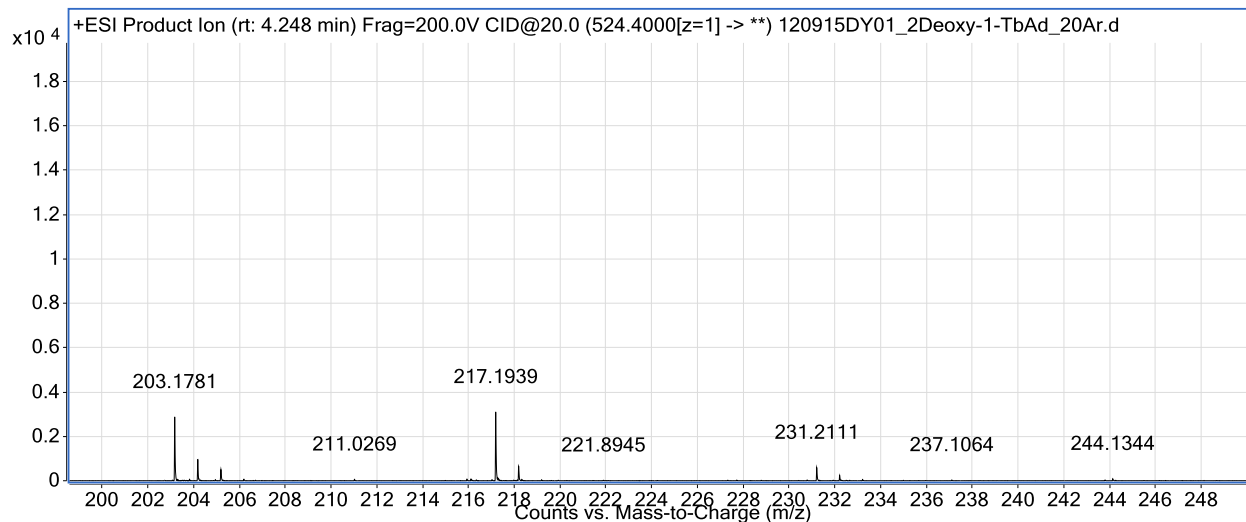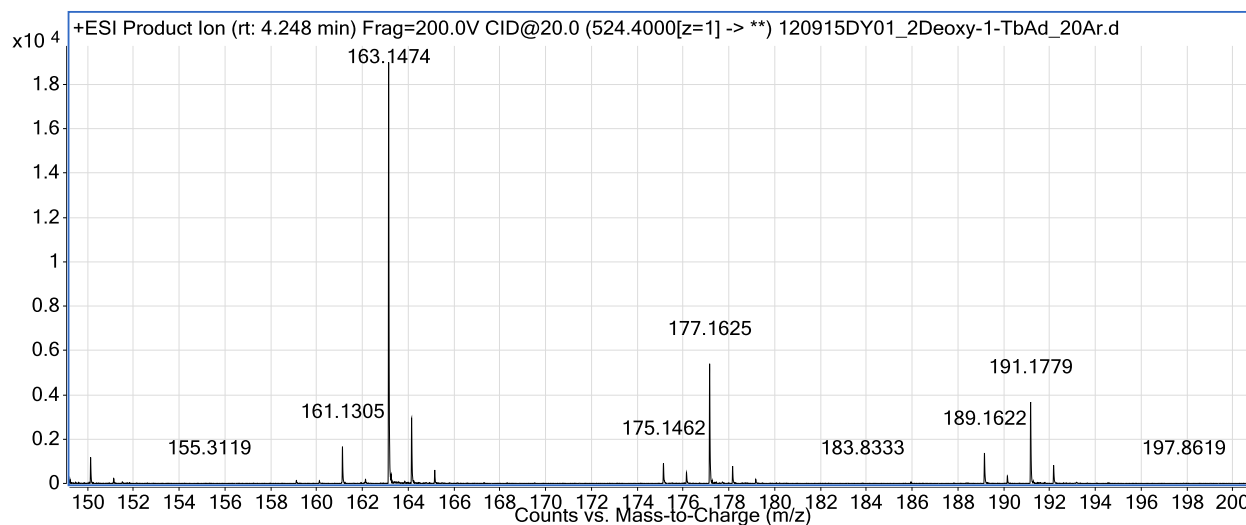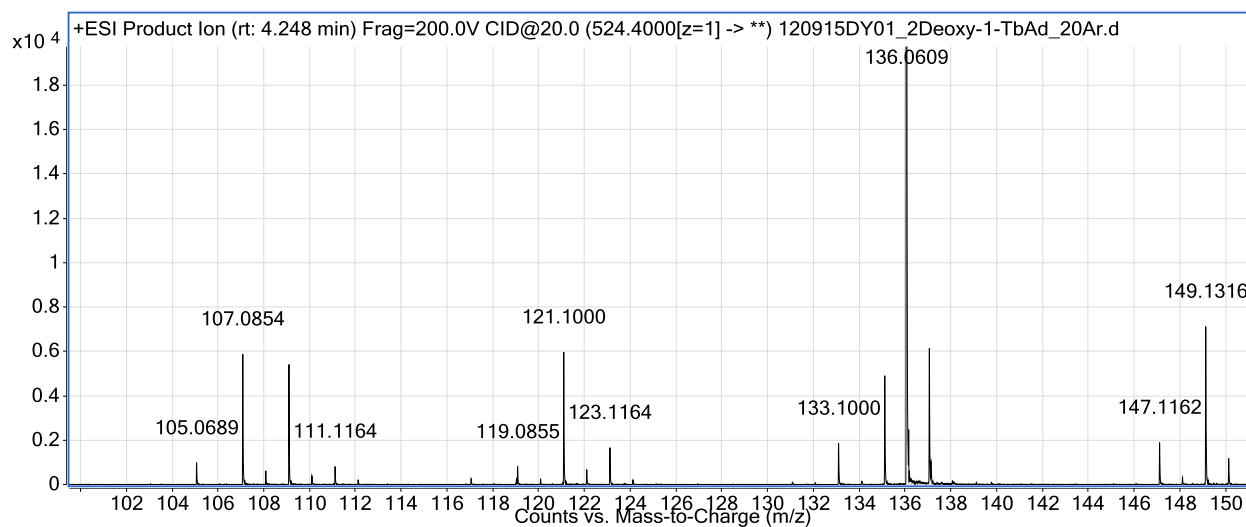

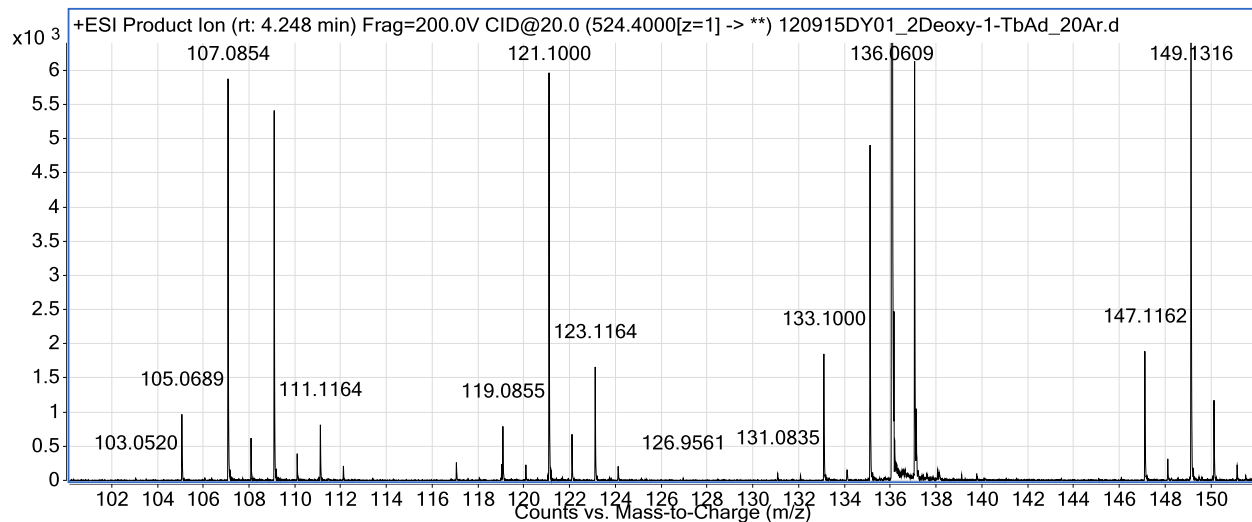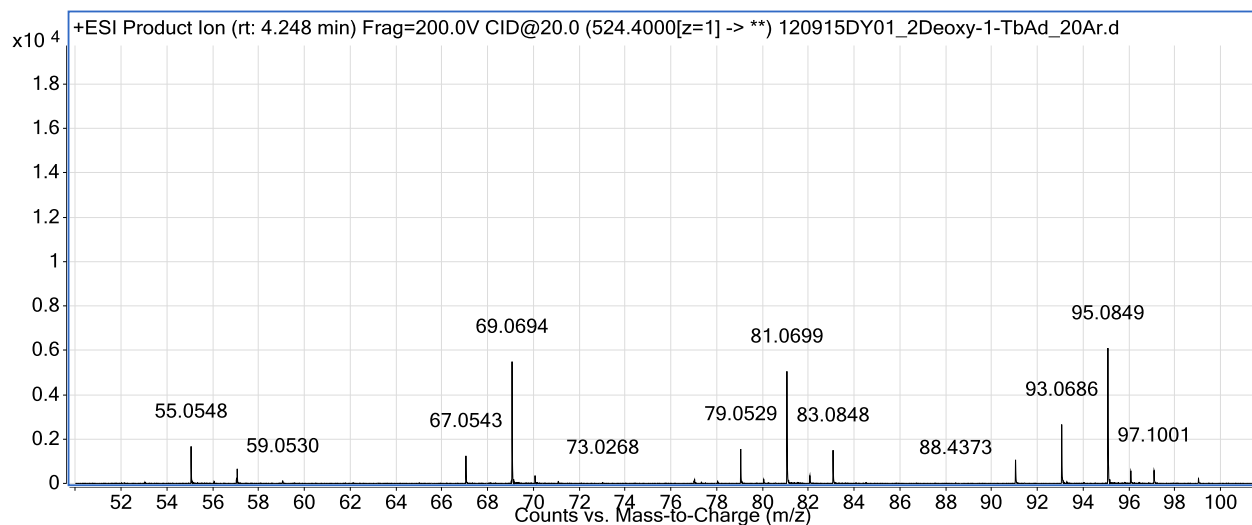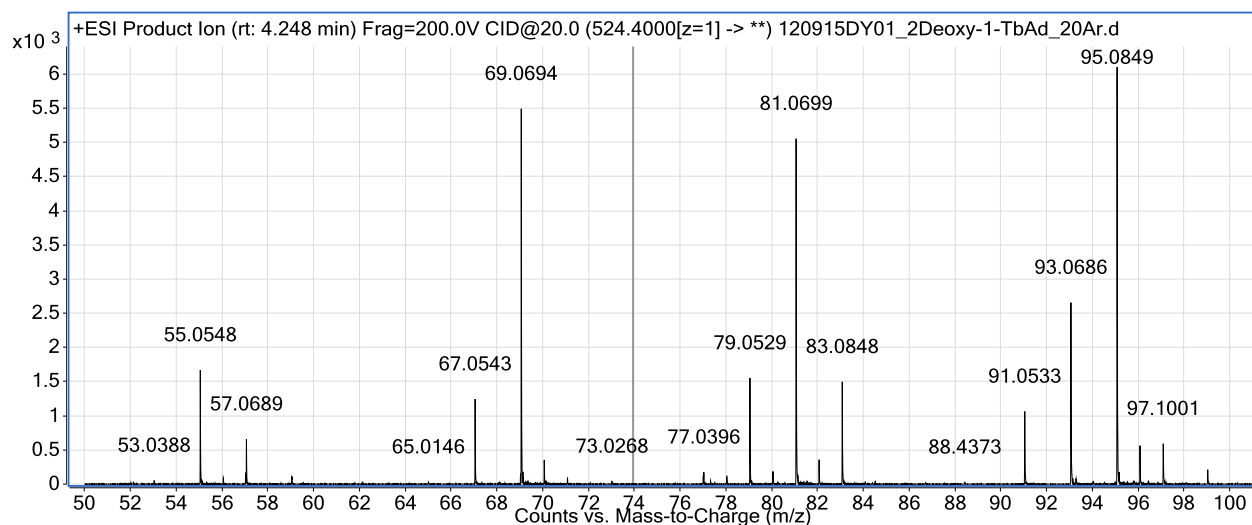



## Computational studies of the Diels-Alder cycloaddition:

### Computational Details

All computations were performed using the ADF software suite. Geometry optimizations and vibrational analysis were performed using the BP86 DFT functional described by Becke and Perdew.<sup>1</sup> The numerical integration was performed using the procedure developed by Becke.<sup>2</sup> Geometry convergence is achieved by having an energy change of less than  $10^{-5}$  Hartree and a gradient change of less than  $10^{-5}$  Hartree/Å. The MOs were expanded in the Slater-type TZ2P basis set in combination with the small frozen core (FC) approximation. All calculations were performed with the corresponding charges and singlet ground state multiplicity in the gas phase. All reaction intermediates were confirmed local minima by vibrational analysis with zero imaginary frequencies, and all transition structures were confirmed to be a proper saddle point on the potential energy surface by the same analysis with only one imaginary frequency. The structures before and after the transition states **11a**, **11b**, **13a**, **13b**, **15a** and **15b** were confirmed using IRC analysis restart from .t21 files containing the Hessian of the transition structures, using 6 points in either direction, and then fully optimizing to the next local minima from the 6th point. Electronic energies (ZPE corrected), internal energies and entropy (233.15K) were obtained from the output files, and free energies were calculated according to standard thermodynamic equations. The geometry of the dienes and the dienophiles at transition states **12a**, **12b**, **14a** and **14b** were isolated and are taken as the activated geometries. Single-point calculations were carried out on the activated geometries with at the same level of theory without further optimization.

<sup>1</sup> (a) Becke, A. D. *Phys. Rev. A* **1988**, 38, 3098. (b) Perdew, J. P. *Phys. Rev. B* **1986**, 33, 8822.

<sup>2</sup> Becke, A. D. *J. Chem. Phys.* **1988**, 88, 2547.

### Activation Strain Analyses

**Table 2.** Activation strain analysis of the transition states in the Diels-Alder reaction shown in figure 1.<sup>[a]</sup>

| Transition states (TS) | $\Delta E^\ddagger$ | $\Delta E_{\text{int}}^\ddagger$ <sup>[b]</sup> | $\Delta E_{\text{strain}}^\ddagger$ (diene) <sup>[c]</sup> | $\Delta E_{\text{strain}}^\ddagger$ (dienophile) <sup>[d]</sup> | $\Delta E_{\text{strain}}^\ddagger$ (total) <sup>[e]</sup> |
|------------------------|---------------------|-------------------------------------------------|------------------------------------------------------------|-----------------------------------------------------------------|------------------------------------------------------------|
| <b>12a</b>             | 3.4                 | -13.1                                           | 5.6                                                        | 10.9                                                            | 16.5                                                       |
| <b>12b</b>             | 7.7                 | -15.7                                           | 8.0                                                        | 15.4                                                            | 23.4                                                       |
| <b>14a</b>             | -0.2                | -79.3                                           | 39.8                                                       | 39.3                                                            | 79.1                                                       |
| <b>14b</b>             | 3.9                 | -71.6                                           | 37.2                                                       | 38.4                                                            | 75.6                                                       |

[a] Energy in kcal/mol. [b]  $\Delta E_{\text{int}}^\ddagger = E(\text{TS}) - E(\text{diene fragment in geom TS}) - E(\text{dienophile fragment in geom TS})$ . [c]  $\Delta E_{\text{strain}}^\ddagger$  (diene) =  $E(\text{diene fragment in geom TS}) - E(\mathbf{1})$ . [d]  $\Delta E_{\text{strain}}^\ddagger$  (dienophile) =  $E(\text{dienophile fragment in geom TS}) - E(\text{dienophile})$ . For **TS = 12a** and **14a**, **dienophile = 2a**; for **TS = 12b** and **14b**, **dienophile = 2b**. [e]  $\Delta E_{\text{strain}}^\ddagger$  (total) =  $\Delta E_{\text{strain}}^\ddagger$  (diene) +  $\Delta E_{\text{strain}}^\ddagger$  (dienophile)

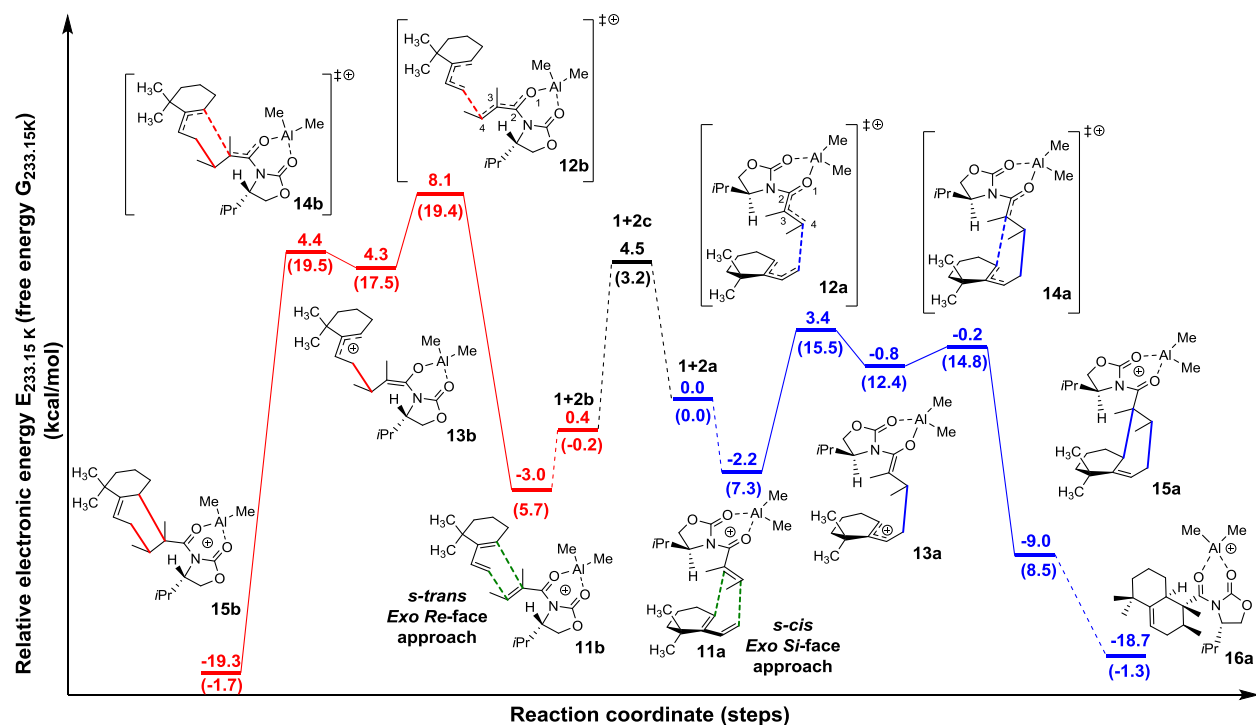

**Figure 1.** The geometry of diene 1, aluminum-complexed *s-cis* conformer of the dienophile (2a) aluminum-complexed *s-cis* conformer of the dienophile (2b), and the transition state between 2a and 2b corresponding to the rotation along the C(2)-C(3) bond (2c) were optimized separately. The energies of the three states 1+2a, 1+2b and 1+2c are the sum of the corresponding diene and aluminum-complexed dienophile fragments.

**Table 3.** Cartesian coordinates (in Å) and ADF total energies and thermodynamic corrections (in indicated units) of all stationary points computed at BP86/TZ2P in the gas phase.

#### Diene (1)

ADF total bond energy: -3379.61 kcal/mol; Entropy: 88.894 cal/mole-K; Internal Energy: 146.884 kcal/mole

|      |           |           |           |
|------|-----------|-----------|-----------|
| 1.C  | 0.650551  | -0.810000 | -0.215214 |
| 2.C  | 2.161884  | 0.556609  | 1.290210  |
| 3.C  | 0.832843  | 0.066727  | 0.794508  |
| 4.C  | 1.829179  | -1.490508 | -0.929556 |
| 5.C  | 3.145711  | -1.233193 | -0.156207 |
| 6.C  | 3.296466  | 0.210936  | 0.322314  |
| 7.C  | -0.712802 | -1.143374 | -0.666277 |
| 8.H  | 2.365286  | 0.120992  | 2.285918  |
| 9.H  | 2.108725  | 1.644563  | 1.458536  |
| 10.H | -0.054049 | 0.451410  | 1.304641  |
| 11.H | 4.273434  | 0.356209  | 0.804696  |
| 12.H | -1.604213 | 0.784251  | -0.560691 |
| 13.C | 1.621381  | -3.019377 | -1.000801 |
| 14.H | 3.992630  | -1.524332 | -0.796239 |
| 15.H | 3.172018  | -1.899402 | 0.722201  |
| 16.H | 3.266419  | 0.896739  | -0.538310 |
| 17.C | -1.731910 | -0.278236 | -0.771655 |
| 18.H | -0.896386 | -2.183316 | -0.949987 |
| 19.H | -2.723294 | -0.608023 | -1.080907 |
| 20.C | 1.936567  | -0.942292 | -2.370490 |
| 21.H | 2.732743  | -1.464641 | -2.920971 |

|      |          |           |           |
|------|----------|-----------|-----------|
| 22.H | 2.160726 | 0.132395  | -2.376640 |
| 23.H | 0.993866 | -1.085507 | -2.915472 |
| 24.H | 2.529930 | -3.495446 | -1.396598 |
| 25.H | 0.792556 | -3.296851 | -1.664460 |
| 26.H | 1.423916 | -3.440800 | -0.005501 |

**Aluminum complexed *s-cis* conformation of dienophile 2 (no diene 1 present!) (2a)**

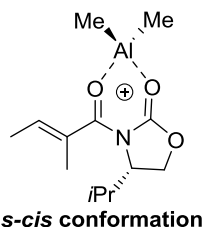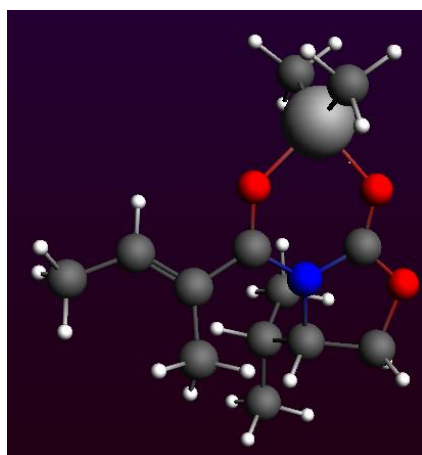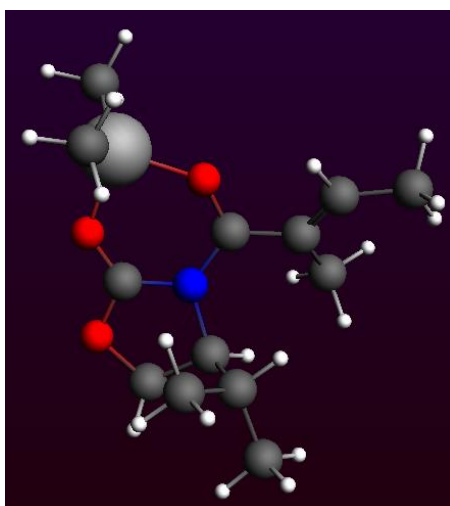

ADF total bond energy: -5229.85 kcal/mol; Entropy: 137.637 cal/mole-K; Internal Energy: 218.607 kcal/mole

|      |           |           |           |
|------|-----------|-----------|-----------|
| 1.N  | -0.315024 | -2.991505 | -0.794384 |
| 2.C  | -0.180854 | -4.303104 | -1.505268 |
| 3.C  | 0.825176  | -5.009363 | -0.577981 |
| 4.O  | 1.470873  | -3.934722 | 0.179058  |
| 5.C  | 0.773642  | -2.822815 | 0.064653  |
| 6.C  | 0.264826  | -4.139219 | -2.975596 |
| 7.H  | -1.137499 | -4.830352 | -1.475303 |
| 8.C  | 1.619102  | -3.438869 | -3.138182 |
| 9.C  | 0.244362  | -5.509712 | -3.668137 |
| 10.O | 1.097990  | -1.799415 | 0.677901  |
| 11.H | 1.615331  | -5.540954 | -1.114175 |
| 12.H | 0.353219  | -5.675517 | 0.152534  |
| 13.H | -0.505701 | -3.511743 | -3.452914 |
| 14.H | 2.441635  | -4.022848 | -2.702345 |
| 15.H | 1.634934  | -2.435945 | -2.690822 |
| 16.H | 1.845500  | -3.315417 | -4.203899 |
| 17.H | 1.006312  | -6.187733 | -3.258566 |
| 18.H | 0.461580  | -5.392214 | -4.736278 |
| 19.H | -0.732828 | -6.003135 | -3.578702 |
| 20.C | -1.209905 | -1.955195 | -1.077374 |
| 21.C | -2.460446 | -2.217138 | -1.800503 |
| 22.C | -2.929037 | -1.171012 | -2.532341 |

|       |           |           |           |
|-------|-----------|-----------|-----------|
| 23.C  | -4.162004 | -1.132506 | -3.352022 |
| 24.O  | -0.936655 | -0.791478 | -0.681544 |
| 25.H  | -4.809173 | -0.312617 | -2.999419 |
| 26.H  | -4.735959 | -2.063365 | -3.351678 |
| 27.H  | -3.909853 | -0.871335 | -4.391931 |
| 28.H  | -2.328808 | -0.258830 | -2.535761 |
| 29.C  | -3.200267 | -3.527063 | -1.653504 |
| 30.H  | -2.987447 | -4.009108 | -0.692120 |
| 31.H  | -2.985053 | -4.241201 | -2.460785 |
| 32.H  | -4.279180 | -3.337853 | -1.675943 |
| 33.Al | 0.402786  | -0.008191 | 0.439223  |
| 34.C  | -0.455074 | 0.531171  | 2.102738  |
| 35.C  | 1.651570  | 0.967702  | -0.699152 |
| 36.H  | 1.962174  | 0.412974  | -1.596155 |
| 37.H  | 2.567323  | 1.223638  | -0.145868 |
| 38.H  | 1.217605  | 1.919183  | -1.040534 |
| 39.H  | 0.294961  | 0.771831  | 2.870647  |
| 40.H  | -1.113176 | -0.242218 | 2.523481  |
| 41.H  | -1.063534 | 1.436780  | 1.963742  |

**Aluminum complexed *s-trans* conformation of dienophile 2 (no diene 1 present!) (2b)**

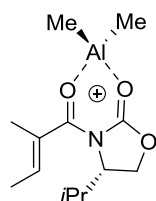

***s-trans* conformation**

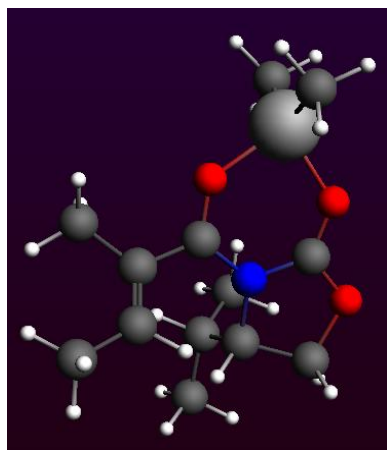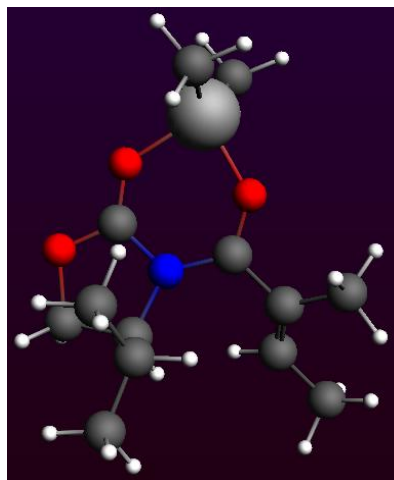

ADF total bond energy: -5229.42 kcal/mol; Entropy: 139.957 cal/mole-K; Internal Energy: 218.504 kcal/mole

|      |           |           |           |
|------|-----------|-----------|-----------|
| 1.N  | -0.198054 | -2.951302 | -0.981991 |
| 2.C  | -0.101581 | -4.378627 | -1.437601 |
| 3.C  | 0.826031  | -4.938109 | -0.343570 |
| 4.O  | 1.514157  | -3.768323 | 0.210827  |
| 5.C  | 0.876320  | -2.669018 | -0.137427 |
| 6.C  | 0.419872  | -4.501230 | -2.886412 |
| 7.H  | -1.083337 | -4.852923 | -1.369360 |
| 8.C  | 1.816056  | -3.903725 | -3.098785 |
| 9.C  | 0.355504  | -5.971692 | -3.324418 |
| 10.O | 1.234501  | -1.559597 | 0.275670  |

|       |           |           |           |
|-------|-----------|-----------|-----------|
| 11.H  | 1.597942  | -5.610670 | -0.725742 |
| 12.H  | 0.288362  | -5.414153 | 0.483920  |
| 13.H  | -0.296096 | -3.938351 | -3.507495 |
| 14.H  | 2.586113  | -4.436223 | -2.523491 |
| 15.H  | 1.867635  | -2.838156 | -2.837715 |
| 16.H  | 2.094393  | -3.984856 | -4.156208 |
| 17.H  | 1.055178  | -6.600779 | -2.756229 |
| 18.H  | 0.633175  | -6.058730 | -4.381390 |
| 19.H  | -0.652541 | -6.391692 | -3.208530 |
| 20.C  | -1.011960 | -1.944616 | -1.509144 |
| 21.C  | -2.269929 | -2.259412 | -2.197120 |
| 22.C  | -3.085566 | -3.201882 | -1.663252 |
| 23.C  | -4.474027 | -3.530165 | -2.077695 |
| 24.O  | -0.667014 | -0.742420 | -1.392044 |
| 25.H  | -4.807611 | -2.995766 | -2.971083 |
| 26.H  | -5.170481 | -3.301224 | -1.255367 |
| 27.H  | -4.569970 | -4.613264 | -2.251417 |
| 28.H  | -2.730755 | -3.746729 | -0.784448 |
| 29.C  | -2.638231 | -1.317838 | -3.316360 |
| 30.H  | -1.783271 | -1.135297 | -3.978942 |
| 31.H  | -2.952929 | -0.343065 | -2.920073 |
| 32.H  | -3.457117 | -1.722593 | -3.917307 |
| 33.Al | 0.665576  | 0.182615  | -0.357391 |
| 34.C  | -0.256841 | 1.081780  | 1.103595  |
| 35.C  | 2.030903  | 0.842270  | -1.583269 |
| 36.H  | 2.366371  | 0.096287  | -2.317842 |
| 37.H  | 2.922580  | 1.175364  | -1.031875 |
| 38.H  | 1.668320  | 1.713549  | -2.148324 |
| 39.H  | 0.459790  | 1.434054  | 1.860314  |
| 40.H  | -0.984572 | 0.440278  | 1.620476  |
| 41.H  | -0.799307 | 1.969681  | 0.747445  |

Aluminum complexed *s-trans/s-cis* equilibrium transition state of dienophile 2 (no diene 1 present!) (2c)

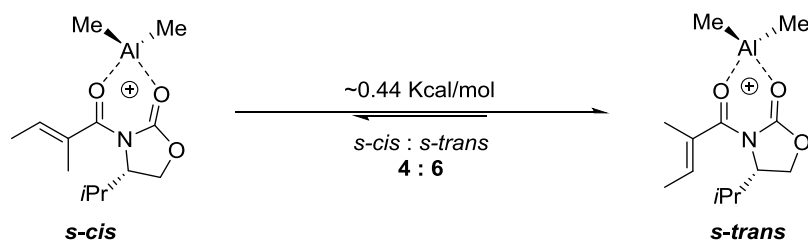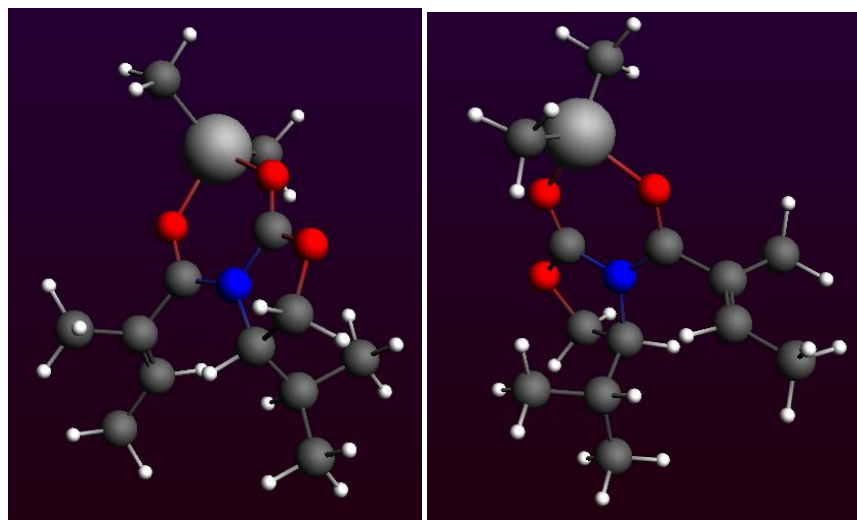

ADF total bond energy: -5266.14 kcal/mol; Entropy: 161.488 cal/mole-K; Internal Energy: 222.564 kcal/mole

|      |           |           |           |
|------|-----------|-----------|-----------|
| 1.N  | -0.217838 | -2.848773 | -0.976261 |
| 2.C  | -0.183283 | -4.156499 | -1.701163 |
| 3.C  | 0.776501  | -4.938303 | -0.782736 |
| 4.O  | 1.523541  | -3.907901 | -0.045559 |
| 5.C  | 0.883919  | -2.760944 | -0.112401 |
| 6.C  | 0.288778  | -4.033333 | -3.166650 |
| 7.H  | -1.189465 | -4.590978 | -1.676857 |
| 8.C  | 1.686798  | -3.422618 | -3.319354 |
| 9.C  | 0.183484  | -5.405354 | -3.848885 |
| 10.O | 1.238147  | -1.772037 | 0.535671  |
| 11.H | 1.513339  | -5.534620 | -1.325295 |
| 12.H | 0.268258  | -5.555364 | -0.033563 |
| 13.H | -0.436802 | -3.365845 | -3.654371 |
| 14.H | 2.468056  | -4.052651 | -2.871730 |
| 15.H | 1.761113  | -2.418661 | -2.879864 |
| 16.H | 1.930211  | -3.322794 | -4.383806 |
| 17.H | 0.893288  | -6.132195 | -3.429422 |
| 18.H | 0.419194  | -5.308986 | -4.915236 |
| 19.H | -0.826719 | -5.828226 | -3.767269 |
| 20.C | -1.228193 | -1.903479 | -0.992544 |
| 21.C | -2.491436 | -2.192607 | -1.726371 |
| 22.C | -2.569422 | -1.886484 | -3.033470 |
| 23.C | -3.771138 | -1.976547 | -3.914328 |
| 24.O | -1.114409 | -0.848212 | -0.329168 |
| 25.H | -4.045304 | -0.972418 | -4.271337 |
| 26.H | -4.644809 | -2.414334 | -3.422260 |
| 27.H | -3.543172 | -2.568428 | -4.812667 |
| 28.H | -1.673655 | -1.484582 | -3.515915 |
| 29.C | -3.610537 | -2.659865 | -0.824652 |

|       |           |           |           |
|-------|-----------|-----------|-----------|
| 30.H  | -3.337027 | -3.566753 | -0.265561 |
| 31.H  | -4.512219 | -2.879891 | -1.403363 |
| 32.H  | -3.858176 | -1.885215 | -0.085093 |
| 33.Al | 0.329543  | -0.052394 | 0.682542  |
| 34.C  | -0.264929 | 0.134588  | 2.525637  |
| 35.C  | 1.238953  | 1.196850  | -0.505376 |
| 36.H  | 1.442013  | 0.789947  | -1.506282 |
| 37.H  | 2.205487  | 1.505053  | -0.079911 |
| 38.H  | 0.648883  | 2.114903  | -0.641800 |
| 39.H  | 0.582740  | 0.349243  | 3.192846  |
| 40.H  | -0.765219 | -0.762739 | 2.916246  |
| 41.H  | -0.968758 | 0.973011  | 2.631869  |

**Aluminum complexed *s-cis* conformation of dienophile in presence of diene (11a)**

ADF total bond energy: -8611.69 kcal/mol; Entropy: 187.115 cal/mole-K; Internal Energy: 366.327 kcal/mole

|      |           |           |           |
|------|-----------|-----------|-----------|
| 1.C  | 0.069226  | -1.936119 | -0.687088 |
| 2.C  | 1.731011  | -1.164349 | 1.062029  |
| 3.C  | 0.535269  | -1.002587 | 0.170472  |
| 4.C  | 0.750541  | -3.302040 | -0.862760 |
| 5.C  | 1.737385  | -3.554414 | 0.303186  |
| 6.C  | 2.610428  | -2.344908 | 0.637303  |
| 7.C  | -1.117993 | -1.670232 | -1.516522 |
| 8.H  | 1.383527  | -1.308637 | 2.101654  |
| 9.H  | 2.312001  | -0.228405 | 1.082606  |
| 10.H | 0.005409  | -0.047284 | 0.230304  |
| 11.H | 3.323819  | -2.596273 | 1.433908  |
| 12.H | -2.283404 | -0.483948 | -0.183417 |
| 13.C | -0.303512 | -4.429890 | -0.846791 |
| 14.H | 2.359613  | -4.427234 | 0.055904  |
| 15.H | 1.156827  | -3.829100 | 1.198637  |
| 16.H | 3.210956  | -2.058938 | -0.240110 |
| 17.C | -2.188326 | -0.934285 | -1.172292 |
| 18.H | -1.135859 | -2.157198 | -2.496710 |
| 19.H | -3.025266 | -0.803422 | -1.857430 |
| 20.C | 1.501670  | -3.340892 | -2.213579 |
| 21.H | 1.936581  | -4.337338 | -2.374535 |
| 22.H | 2.314124  | -2.603005 | -2.244828 |
| 23.H | 0.829463  | -3.136403 | -3.058068 |
| 24.H | 0.195759  | -5.407675 | -0.894177 |
| 25.H | -0.991904 | -4.367321 | -1.699439 |
| 26.H | -0.901647 | -4.397428 | 0.073439  |
| 27.N | 2.344039  | 5.503612  | -2.164703 |
| 28.C | 3.091271  | 5.648194  | -3.454380 |
| 29.C | 4.167855  | 6.662809  | -3.028128 |
| 30.O | 3.638827  | 7.301092  | -1.821279 |
| 31.C | 2.634887  | 6.591675  | -1.343469 |
| 32.C | 2.180719  | 6.088166  | -4.622697 |
| 33.H | 3.565475  | 4.696746  | -3.707186 |
| 34.C | 1.483107  | 7.433906  | -4.391449 |
| 35.C | 2.989255  | 6.081288  | -5.928257 |
| 36.O | 2.075723  | 6.911330  | -0.286768 |
| 37.H | 4.335995  | 7.455841  | -3.761171 |
| 38.H | 5.120996  | 6.197923  | -2.752883 |
| 39.H | 1.405023  | 5.309408  | -4.705957 |
| 40.H | 2.199482  | 8.264098  | -4.318800 |
| 41.H | 0.859362  | 7.438178  | -3.487666 |
| 42.H | 0.820749  | 7.656883  | -5.236421 |
| 43.H | 3.773205  | 6.851770  | -5.929758 |
| 44.H | 2.329700  | 6.294138  | -6.777825 |

|       |           |          |           |
|-------|-----------|----------|-----------|
| 45.H  | 3.467409  | 5.109741 | -6.112463 |
| 46.C  | 1.311944  | 4.600498 | -1.875522 |
| 47.C  | 1.177890  | 3.353200 | -2.625963 |
| 48.C  | -0.090962 | 2.862145 | -2.709487 |
| 49.C  | -0.524550 | 1.627209 | -3.392122 |
| 50.O  | 0.509280  | 4.879164 | -0.942591 |
| 51.H  | -0.905265 | 0.903642 | -2.641785 |
| 52.H  | 0.258507  | 1.135309 | -3.976355 |
| 53.H  | -1.385427 | 1.838190 | -4.043967 |
| 54.H  | -0.879884 | 3.446067 | -2.230825 |
| 55.C  | 2.378606  | 2.627248 | -3.188894 |
| 56.H  | 3.292386  | 2.855105 | -2.627615 |
| 57.H  | 2.557047  | 2.838153 | -4.252913 |
| 58.H  | 2.218818  | 1.547093 | -3.099633 |
| 59.Al | 0.405815  | 6.223277 | 0.406068  |
| 60.C  | 0.767263  | 5.384450 | 2.127801  |
| 61.C  | -1.005369 | 7.479623 | -0.085913 |
| 62.H  | -0.976992 | 7.788219 | -1.140904 |
| 63.H  | -0.943066 | 8.396208 | 0.519237  |
| 64.H  | -2.001618 | 7.051106 | 0.098939  |
| 65.H  | 1.638818  | 4.714782 | 2.110531  |
| 66.H  | -0.092646 | 4.792092 | 2.473244  |
| 67.H  | 0.956530  | 6.143163 | 2.901593  |

**Aluminum complexed *s-trans* conformation of dienophile in presence of diene (11b)**

ADF total bond energy: -8612.44 kcal/mol; Entropy: 216.271 cal/mole-K; Internal Energy: 372.474 kcal/mole

|      |           |           |           |
|------|-----------|-----------|-----------|
| 1.N  | -0.634957 | -1.667244 | -0.678610 |
| 2.C  | -1.647458 | -2.769116 | -0.806352 |
| 3.C  | -1.725438 | -3.226519 | 0.660903  |
| 4.O  | -0.484019 | -2.743748 | 1.280352  |
| 5.C  | 0.072687  | -1.832554 | 0.513316  |
| 6.C  | -1.217363 | -3.846546 | -1.826211 |
| 7.H  | -2.609644 | -2.348064 | -1.107034 |
| 8.C  | 0.107609  | -4.536980 | -1.480782 |
| 9.C  | -2.358335 | -4.858759 | -2.003753 |
| 10.O | 1.094548  | -1.229174 | 0.867605  |
| 11.H | -1.734816 | -4.312802 | 0.780567  |
| 12.H | -2.559829 | -2.773510 | 1.212462  |
| 13.H | -1.092145 | -3.317005 | -2.784822 |
| 14.H | 0.045150  | -5.105432 | -0.542456 |
| 15.H | 0.946063  | -3.832177 | -1.399763 |
| 16.H | 0.368706  | -5.251434 | -2.270587 |
| 17.H | -2.538073 | -5.439054 | -1.087761 |
| 18.H | -2.102683 | -5.575842 | -2.792743 |
| 19.H | -3.299845 | -4.370163 | -2.287815 |
| 20.C | -0.222472 | -0.775711 | -1.669071 |
| 21.C | -1.078825 | -0.455326 | -2.817792 |
| 22.C | -2.398318 | -0.225726 | -2.608119 |
| 23.C | -3.383152 | 0.287313  | -3.595795 |
| 24.O | 0.909397  | -0.233584 | -1.587721 |
| 25.H | -3.764579 | 1.266357  | -3.265760 |
| 26.H | -4.262192 | -0.374789 | -3.628353 |
| 27.H | -2.982859 | 0.396134  | -4.607255 |
| 28.H | -2.793669 | -0.358285 | -1.596566 |
| 29.C | -0.338158 | -0.187735 | -4.104957 |
| 30.H | -1.022694 | -0.175635 | -4.957516 |
| 31.H | 0.426502  | -0.952209 | -4.289599 |
| 32.H | 0.177847  | 0.780959  | -4.065828 |



|       |           |           |           |
|-------|-----------|-----------|-----------|
| 33.AI | 2.247533  | -0.118821 | -0.216417 |
| 34.C  | 2.199163  | 1.691076  | 0.504628  |
| 35.C  | 3.773496  | -1.200984 | -0.770060 |
| 36.H  | 3.498019  | -2.196162 | -1.147421 |
| 37.H  | 4.468639  | -1.355522 | 0.068400  |
| 38.H  | 4.347106  | -0.700646 | -1.564209 |
| 39.H  | 2.768195  | 1.753627  | 1.444070  |
| 40.H  | 1.181545  | 2.047708  | 0.717760  |
| 41.H  | 2.658633  | 2.410304  | -0.189056 |
| 42.C  | -5.087557 | -0.079344 | 1.126060  |
| 43.C  | -3.780695 | 2.086218  | 0.938083  |
| 44.C  | -3.939684 | 0.624566  | 1.243091  |
| 45.C  | -6.372814 | 0.541472  | 0.556384  |
| 46.C  | -6.065803 | 1.920043  | -0.077389 |
| 47.C  | -5.132709 | 2.784812  | 0.769684  |
| 48.C  | -5.156159 | -1.476592 | 1.592885  |
| 49.H  | -3.168824 | 2.217054  | 0.025556  |
| 50.H  | -3.194021 | 2.559019  | 1.741733  |
| 51.H  | -3.057151 | 0.105065  | 1.630814  |
| 52.H  | -5.000146 | 3.773742  | 0.310737  |
| 53.H  | -3.996179 | -1.321686 | 3.372526  |
| 54.C  | -6.983070 | -0.357543 | -0.541135 |
| 55.H  | -7.016371 | 2.440216  | -0.264473 |
| 56.H  | -5.601152 | 1.758314  | -1.065502 |
| 57.H  | -5.579010 | 2.958388  | 1.759875  |
| 58.C  | -4.563259 | -1.962416 | 2.695993  |
| 59.H  | -5.786721 | -2.157347 | 1.013635  |
| 60.H  | -4.676410 | -3.007782 | 2.983253  |
| 61.C  | -7.406278 | 0.692257  | 1.696438  |
| 62.H  | -8.352727 | 1.086299  | 1.300980  |
| 63.H  | -7.048984 | 1.374600  | 2.477896  |
| 64.H  | -7.614416 | -0.274843 | 2.172643  |
| 65.H  | -7.827940 | 0.162371  | -1.012988 |
| 66.H  | -7.368941 | -1.304353 | -0.143117 |
| 67.H  | -6.249023 | -0.584945 | -1.327845 |

Aluminum complexed *s-cis* pathway, first transition state (12a)

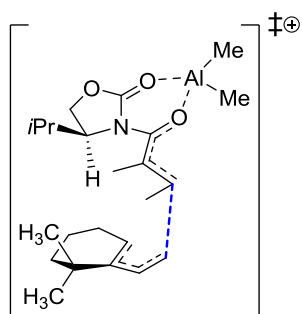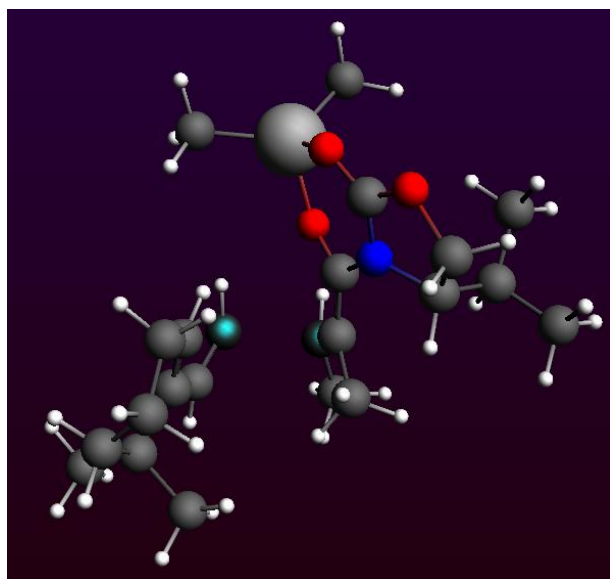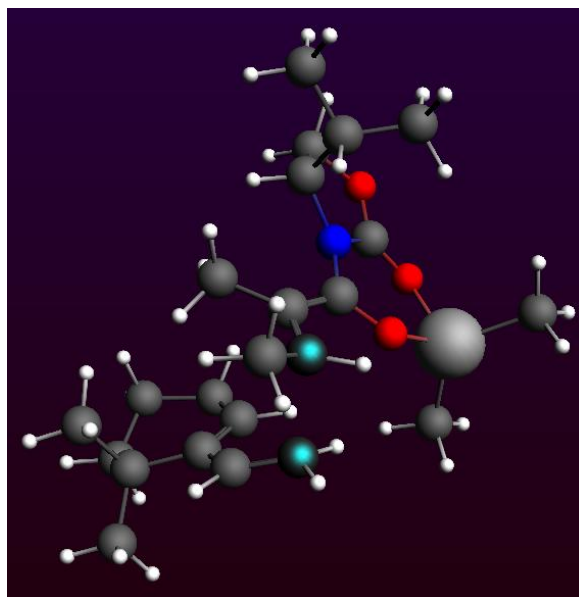

ADF total bond energy: -8606.04 kcal/mol; Entropy: 177.565 cal/mole-K; Internal Energy: 366.705 kcal/mole

|      |           |           |           |
|------|-----------|-----------|-----------|
| 1.C  | 0.433867  | -0.547575 | -0.732083 |
| 2.C  | 2.457255  | 0.172818  | 0.615797  |
| 3.C  | 1.134112  | 0.396342  | -0.032228 |
| 4.C  | 0.931554  | -1.998375 | -0.859987 |
| 5.C  | 2.089099  | -2.253453 | 0.137450  |
| 6.C  | 3.124811  | -1.130434 | 0.171341  |
| 7.C  | -0.802658 | -0.196584 | -1.380492 |
| 8.H  | 2.297510  | 0.167341  | 1.711447  |
| 9.H  | 3.106979  | 1.046475  | 0.442940  |
| 10.H | 0.689258  | 1.384459  | 0.103213  |
| 11.H | 3.947197  | -1.385907 | 0.851797  |
| 12.H | -1.181396 | 1.791325  | -0.644690 |
| 13.C | -0.206201 | -2.986084 | -0.517475 |
| 14.H | 2.563126  | -3.212327 | -0.114956 |
| 15.H | 1.663933  | -2.373325 | 1.146885  |
| 16.H | 3.574978  | -0.996269 | -0.823983 |
| 17.C | -1.443300 | 1.028379  | -1.375854 |
| 18.H | -1.269755 | -0.984646 | -1.975387 |
| 19.H | -2.473604 | 1.056847  | -1.727778 |
| 20.C | 1.405404  | -2.263644 | -2.306042 |
| 21.H | 1.698586  | -3.316005 | -2.419840 |
| 22.H | 2.269069  | -1.640433 | -2.573506 |
| 23.H | 0.606556  | -2.065287 | -3.034389 |

|       |           |           |           |
|-------|-----------|-----------|-----------|
| 24.H  | 0.192287  | -4.009455 | -0.501278 |
| 25.H  | -1.019853 | -2.969704 | -1.253904 |
| 26.H  | -0.633308 | -2.774338 | 0.471535  |
| 27.N  | 2.144131  | 4.251985  | -1.964134 |
| 28.C  | 2.996386  | 4.513007  | -3.166924 |
| 29.C  | 4.213520  | 5.166702  | -2.488400 |
| 30.O  | 3.719686  | 5.648359  | -1.199246 |
| 31.C  | 2.554130  | 5.072702  | -0.937805 |
| 32.C  | 2.278748  | 5.369183  | -4.234245 |
| 33.H  | 3.295201  | 3.564796  | -3.620440 |
| 34.C  | 1.847651  | 6.753095  | -3.734898 |
| 35.C  | 3.161123  | 5.465434  | -5.487371 |
| 36.O  | 1.971035  | 5.297672  | 0.138146  |
| 37.H  | 4.603373  | 6.033566  | -3.028483 |
| 38.H  | 5.025156  | 4.459715  | -2.281526 |
| 39.H  | 1.371352  | 4.805226  | -4.505910 |
| 40.H  | 2.708047  | 7.380066  | -3.462156 |
| 41.H  | 1.174674  | 6.698002  | -2.869161 |
| 42.H  | 1.305143  | 7.281332  | -4.528252 |
| 43.H  | 4.082103  | 6.034700  | -5.296941 |
| 44.H  | 2.622471  | 5.986478  | -6.287799 |
| 45.H  | 3.446818  | 4.474949  | -5.866852 |
| 46.C  | 0.882944  | 3.587915  | -1.948661 |
| 47.C  | 0.614375  | 2.508740  | -2.823038 |
| 48.C  | -0.751316 | 2.185422  | -3.017099 |
| 49.C  | -1.206974 | 1.406959  | -4.220500 |
| 50.O  | -0.000173 | 4.025467  | -1.123850 |
| 51.H  | -2.264295 | 1.131827  | -4.143840 |
| 52.H  | -0.620991 | 0.499267  | -4.399064 |
| 53.H  | -1.103368 | 2.043958  | -5.114036 |
| 54.H  | -1.447053 | 2.954407  | -2.679117 |
| 55.C  | 1.686484  | 1.698300  | -3.504541 |
| 56.H  | 2.642086  | 1.738213  | -2.972169 |
| 57.H  | 1.851762  | 1.989799  | -4.553553 |
| 58.H  | 1.382446  | 0.643841  | -3.520272 |
| 59.AI | 0.081054  | 5.089601  | 0.420519  |
| 60.C  | -0.175325 | 3.950012  | 1.992335  |
| 61.C  | -0.783948 | 6.812885  | 0.091829  |
| 62.H  | -0.477412 | 7.290444  | -0.850070 |
| 63.H  | -0.564923 | 7.526343  | 0.900065  |
| 64.H  | -1.878807 | 6.707682  | 0.056459  |
| 65.H  | 0.495700  | 3.079101  | 2.021237  |
| 66.H  | -1.206447 | 3.571799  | 2.059519  |
| 67.H  | 0.005076  | 4.518844  | 2.916985  |

Aluminum complexed *s-cis* intermediate (13a)

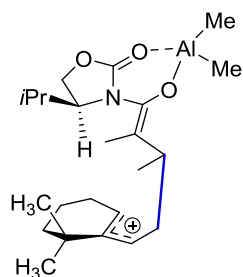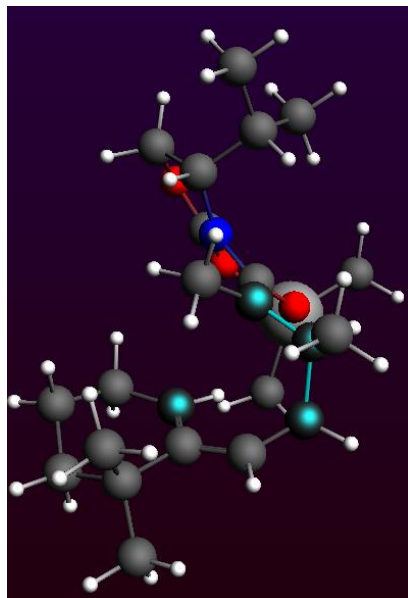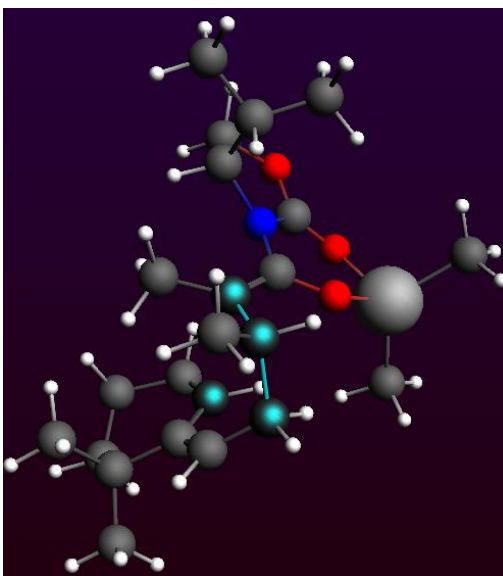

ADF total bond energy: -8610.21 kcal/mol; Entropy: 179.800 cal/mole-K; Internal Energy: 368.253 kcal/mole

|      |           |           |           |
|------|-----------|-----------|-----------|
| 1.C  | 0.351259  | -0.388783 | -0.873689 |
| 2.C  | 2.384477  | 0.636988  | 0.255694  |
| 3.C  | 1.011448  | 0.698729  | -0.299534 |
| 4.C  | 0.954579  | -1.807243 | -0.845679 |
| 5.C  | 2.166681  | -1.847986 | 0.117801  |
| 6.C  | 3.120311  | -0.666286 | -0.060606 |
| 7.C  | -0.867861 | -0.155976 | -1.515103 |
| 8.H  | 2.286786  | 0.770290  | 1.352223  |
| 9.H  | 2.951513  | 1.529398  | -0.059945 |
| 10.H | 0.451117  | 1.614444  | -0.117215 |
| 11.H | 3.993177  | -0.771341 | 0.595910  |
| 12.H | -1.375259 | 1.797499  | -0.817221 |
| 13.C | -0.103833 | -2.805607 | -0.328438 |
| 14.H | 2.696572  | -2.799268 | -0.027253 |
| 15.H | 1.797413  | -1.853067 | 1.156102  |
| 16.H | 3.507693  | -0.639074 | -1.089930 |
| 17.C | -1.483947 | 1.147842  | -1.693718 |
| 18.H | -1.350976 | -1.005647 | -2.002669 |
| 19.H | -2.546710 | 1.050206  | -1.942518 |
| 20.C | 1.391462  | -2.230469 | -2.264770 |
| 21.H | 1.763879  | -3.263361 | -2.249036 |
| 22.H | 2.192131  | -1.590818 | -2.659174 |
| 23.H | 0.551041  | -2.192228 | -2.971227 |

|       |           |           |           |
|-------|-----------|-----------|-----------|
| 24.H  | 0.352385  | -3.798706 | -0.221395 |
| 25.H  | -0.952183 | -2.912308 | -1.016536 |
| 26.H  | -0.492315 | -2.503976 | 0.653051  |
| 27.N  | 2.190115  | 4.053927  | -1.904921 |
| 28.C  | 3.020736  | 4.360761  | -3.111751 |
| 29.C  | 4.252373  | 4.981840  | -2.427920 |
| 30.O  | 3.780501  | 5.419749  | -1.115594 |
| 31.C  | 2.613020  | 4.838225  | -0.862894 |
| 32.C  | 2.288655  | 5.260429  | -4.132130 |
| 33.H  | 3.308113  | 3.430930  | -3.609701 |
| 34.C  | 1.873752  | 6.626132  | -3.572540 |
| 35.C  | 3.147398  | 5.400422  | -5.397309 |
| 36.O  | 2.038978  | 5.032298  | 0.226786  |
| 37.H  | 4.641914  | 5.864349  | -2.942505 |
| 38.H  | 5.061382  | 4.261355  | -2.260014 |
| 39.H  | 1.372934  | 4.711610  | -4.407483 |
| 40.H  | 2.742304  | 7.237170  | -3.289672 |
| 41.H  | 1.214712  | 6.539677  | -2.698882 |
| 42.H  | 1.321324  | 7.187733  | -4.335616 |
| 43.H  | 4.075480  | 5.956574  | -5.202324 |
| 44.H  | 2.597274  | 5.955239  | -6.166687 |
| 45.H  | 3.419713  | 4.423777  | -5.820198 |
| 46.C  | 0.893433  | 3.437417  | -1.910850 |
| 47.C  | 0.601571  | 2.349223  | -2.733236 |
| 48.C  | -0.843985 | 2.030754  | -2.921180 |
| 49.C  | -1.201078 | 1.401118  | -4.271173 |
| 50.O  | 0.000001  | 3.955397  | -1.124859 |
| 51.H  | -2.287567 | 1.271608  | -4.349494 |
| 52.H  | -0.735873 | 0.420094  | -4.423838 |
| 53.H  | -0.888070 | 2.052702  | -5.097196 |
| 54.H  | -1.410124 | 2.963497  | -2.799077 |
| 55.C  | 1.626895  | 1.569507  | -3.503827 |
| 56.H  | 2.619674  | 1.603363  | -3.043093 |
| 57.H  | 1.714971  | 1.897634  | -4.552568 |
| 58.H  | 1.328075  | 0.513612  | -3.546489 |
| 59.AI | 0.132709  | 4.931344  | 0.459113  |
| 60.C  | -0.225865 | 3.753268  | 1.988405  |
| 61.C  | -0.619371 | 6.723233  | 0.228703  |
| 62.H  | -0.270646 | 7.236913  | -0.678758 |
| 63.H  | -0.368875 | 7.371126  | 1.081727  |
| 64.H  | -1.717997 | 6.687827  | 0.174355  |
| 65.H  | 0.425172  | 2.867684  | 2.035393  |
| 66.H  | -1.266607 | 3.394939  | 1.991174  |
| 67.H  | -0.085564 | 4.295614  | 2.935680  |

Aluminum complexed *s-cis* pathway, second transition state (14a)

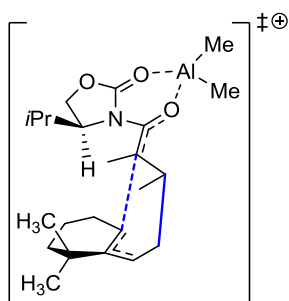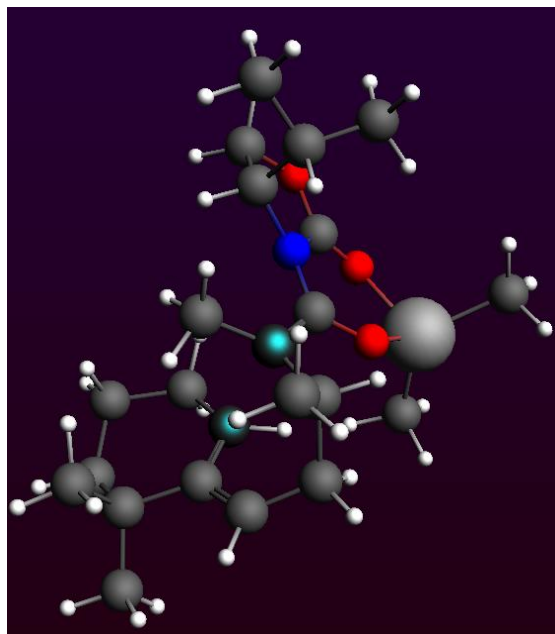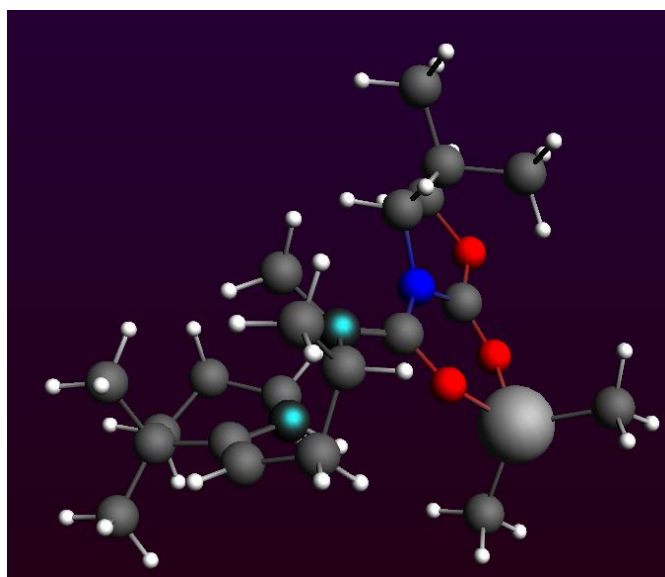

ADF total bond energy: -8609.63 kcal/mol; Entropy: 172.607 cal/mole-K; Internal Energy: 368.334 kcal/mole

|      |           |           |           |
|------|-----------|-----------|-----------|
| 1.C  | 0.279625  | -0.343308 | -0.980985 |
| 2.C  | 2.352492  | 0.863488  | -0.091088 |
| 3.C  | 0.929495  | 0.854282  | -0.554810 |
| 4.C  | 0.974998  | -1.720461 | -0.921542 |
| 5.C  | 2.276661  | -1.632141 | -0.088638 |
| 6.C  | 3.127196  | -0.411004 | -0.434448 |
| 7.C  | -0.996019 | -0.211454 | -1.477400 |
| 8.H  | 2.316194  | 0.987269  | 1.007990  |
| 9.H  | 2.874252  | 1.766906  | -0.445014 |
| 10.H | 0.288797  | 1.623845  | -0.125063 |
| 11.H | 4.072129  | -0.428146 | 0.124020  |
| 12.H | -1.589995 | 1.712511  | -0.775164 |
| 13.C | 0.034754  | -2.736390 | -0.237647 |
| 14.H | 2.848764  | -2.558639 | -0.234916 |
| 15.H | 2.017584  | -1.592382 | 0.981772  |
| 16.H | 3.397266  | -0.423360 | -1.500861 |
| 17.C | -1.617181 | 1.104168  | -1.691242 |
| 18.H | -1.525183 | -1.098319 | -1.829241 |
| 19.H | -2.663684 | 1.011250  | -2.002407 |
| 20.C | 1.298076  | -2.226618 | -2.344722 |
| 21.H | 1.719380  | -3.239610 | -2.294168 |
| 22.H | 2.029568  | -1.588452 | -2.857781 |
| 23.H | 0.393740  | -2.270524 | -2.965939 |

|       |           |           |           |
|-------|-----------|-----------|-----------|
| 24.H  | 0.558960  | -3.693498 | -0.113497 |
| 25.H  | -0.867481 | -2.934635 | -0.829708 |
| 26.H  | -0.275593 | -2.387327 | 0.755731  |
| 27.N  | 2.174582  | 3.989388  | -1.767158 |
| 28.C  | 3.045213  | 4.225611  | -2.964540 |
| 29.C  | 4.247441  | 4.904536  | -2.286284 |
| 30.O  | 3.727884  | 5.426602  | -1.024027 |
| 31.C  | 2.560947  | 4.854876  | -0.763252 |
| 32.C  | 2.336536  | 5.051040  | -4.061545 |
| 33.H  | 3.358555  | 3.269588  | -3.389074 |
| 34.C  | 1.894659  | 6.446182  | -3.604353 |
| 35.C  | 3.230942  | 5.116620  | -5.307903 |
| 36.O  | 1.958116  | 5.116853  | 0.292095  |
| 37.H  | 4.645775  | 5.753961  | -2.847471 |
| 38.H  | 5.056658  | 4.207008  | -2.041056 |
| 39.H  | 1.432713  | 4.477700  | -4.327158 |
| 40.H  | 2.749659  | 7.083367  | -3.338822 |
| 41.H  | 1.211402  | 6.412164  | -2.745536 |
| 42.H  | 1.359701  | 6.950529  | -4.418055 |
| 43.H  | 4.148284  | 5.693400  | -5.123055 |
| 44.H  | 2.699159  | 5.614878  | -6.127160 |
| 45.H  | 3.523354  | 4.117311  | -5.658097 |
| 46.C  | 0.898094  | 3.351056  | -1.759187 |
| 47.C  | 0.618750  | 2.184152  | -2.512846 |
| 48.C  | -0.858292 | 1.965824  | -2.802536 |
| 49.C  | -1.147739 | 1.398182  | -4.199273 |
| 50.O  | 0.002559  | 3.851898  | -0.984396 |
| 51.H  | -2.231677 | 1.382732  | -4.368185 |
| 52.H  | -0.779732 | 0.372757  | -4.326112 |
| 53.H  | -0.703854 | 2.018179  | -4.988217 |
| 54.H  | -1.345276 | 2.947004  | -2.725739 |
| 55.C  | 1.630568  | 1.500315  | -3.393688 |
| 56.H  | 2.624564  | 1.453433  | -2.936081 |
| 57.H  | 1.722523  | 1.974582  | -4.383075 |
| 58.H  | 1.312906  | 0.468479  | -3.578651 |
| 59.AI | 0.060937  | 4.928997  | 0.552409  |
| 60.C  | -0.225606 | 3.806657  | 2.131983  |
| 61.C  | -0.784223 | 6.654658  | 0.191996  |
| 62.H  | -0.458080 | 7.119570  | -0.749556 |
| 63.H  | -0.573450 | 7.374854  | 0.996343  |
| 64.H  | -1.879038 | 6.556815  | 0.139198  |
| 65.H  | 0.438087  | 2.930964  | 2.183026  |
| 66.H  | -1.260418 | 3.436188  | 2.184939  |
| 67.H  | -0.057593 | 4.383902  | 3.053719  |

Product for the *s-cis* pathway before conformation change (15a)

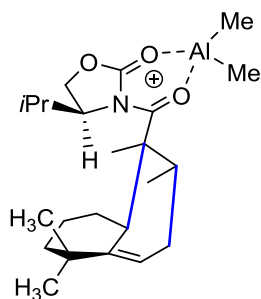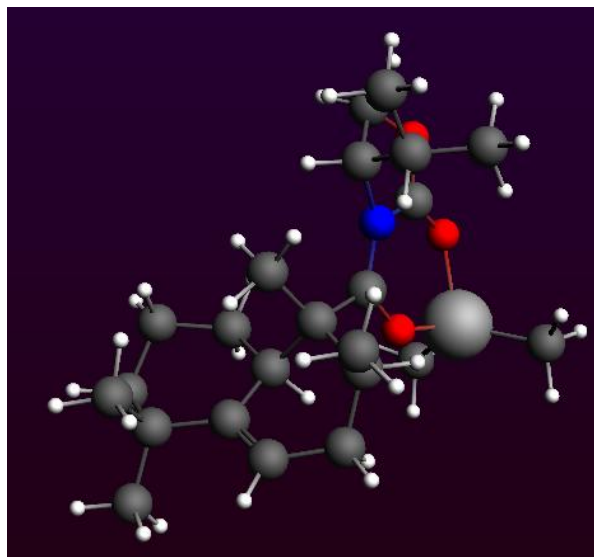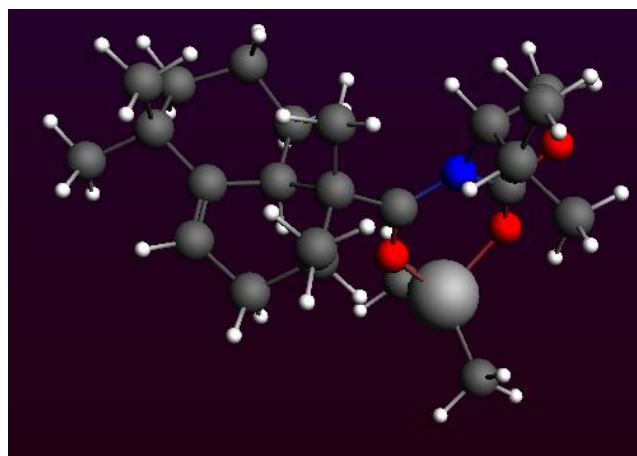

ADF total bond energy: -8618.42 kcal/mol: Entropy: 167.140 cal/mole-K: Internal Energy: 369.634 kcal/mole

|      |           |           |           |
|------|-----------|-----------|-----------|
| 1.C  | 0.175537  | -0.419841 | -1.269325 |
| 2.C  | 2.159313  | 0.791080  | -0.080673 |
| 3.C  | 0.799708  | 0.891185  | -0.817254 |
| 4.C  | 0.863548  | -1.786636 | -1.108938 |
| 5.C  | 2.046428  | -1.702322 | -0.115032 |
| 6.C  | 2.946542  | -0.493512 | -0.354385 |
| 7.C  | -1.048287 | -0.286017 | -1.814660 |
| 8.H  | 1.954228  | 0.828131  | 0.999270  |
| 9.H  | 2.786167  | 1.672691  | -0.290855 |
| 10.H | 0.084431  | 1.347690  | -0.119148 |
| 11.H | 3.819726  | -0.530553 | 0.311668  |
| 12.H | -1.875054 | 1.488292  | -0.955571 |
| 13.C | -0.139053 | -2.827952 | -0.567377 |
| 14.H | 2.623089  | -2.635837 | -0.181290 |
| 15.H | 1.653265  | -1.652962 | 0.913642  |
| 16.H | 3.341455  | -0.510758 | -1.381486 |
| 17.C | -1.641014 | 1.080307  | -1.953474 |
| 18.H | -1.614003 | -1.148283 | -2.166476 |
| 19.H | -2.587818 | 1.056592  | -2.506846 |
| 20.C | 1.381131  | -2.288603 | -2.479332 |
| 21.H | 1.806130  | -3.296245 | -2.372360 |
| 22.H | 2.166569  | -1.643663 | -2.895215 |
| 23.H | 0.563561  | -2.340289 | -3.209553 |



|       |           |           |           |
|-------|-----------|-----------|-----------|
| 24.H  | 0.379434  | -3.778550 | -0.381184 |
| 25.H  | -0.949245 | -3.031547 | -1.278268 |
| 26.H  | -0.588106 | -2.492121 | 0.376149  |
| 27.N  | 2.168158  | 4.130052  | -1.678994 |
| 28.C  | 3.034562  | 4.219511  | -2.902853 |
| 29.C  | 4.187190  | 5.072631  | -2.356632 |
| 30.O  | 3.611995  | 5.793333  | -1.220527 |
| 31.C  | 2.498562  | 5.203381  | -0.835709 |
| 32.C  | 2.282167  | 4.827556  | -4.108683 |
| 33.H  | 3.403668  | 3.227129  | -3.161406 |
| 34.C  | 1.773015  | 6.255300  | -3.875126 |
| 35.C  | 3.169039  | 4.736619  | -5.358865 |
| 36.O  | 1.892331  | 5.602128  | 0.165478  |
| 37.H  | 4.550952  | 5.823460  | -3.062385 |
| 38.H  | 5.025263  | 4.481118  | -1.970802 |
| 39.H  | 1.405725  | 4.179109  | -4.270686 |
| 40.H  | 2.594507  | 6.969311  | -3.724786 |
| 41.H  | 1.092069  | 6.328516  | -3.016589 |
| 42.H  | 1.212274  | 6.593889  | -4.754421 |
| 43.H  | 4.059659  | 5.375415  | -5.277116 |
| 44.H  | 2.611241  | 5.077066  | -6.239152 |
| 45.H  | 3.504898  | 3.708971  | -5.552510 |
| 46.C  | 1.091627  | 3.278194  | -1.397396 |
| 47.C  | 0.812520  | 1.940636  | -2.060926 |
| 48.C  | -0.669051 | 2.062752  | -2.669613 |
| 49.C  | -0.747969 | 1.870221  | -4.189573 |
| 50.O  | 0.313421  | 3.619134  | -0.470788 |
| 51.H  | -1.782974 | 2.043550  | -4.510766 |
| 52.H  | -0.474693 | 0.853047  | -4.495841 |
| 53.H  | -0.120323 | 2.577343  | -4.746655 |
| 54.H  | -1.034766 | 3.075577  | -2.454325 |
| 55.C  | 1.831375  | 1.429479  | -3.082818 |
| 56.H  | 2.831042  | 1.327171  | -2.644481 |
| 57.H  | 1.892145  | 2.035467  | -3.990920 |
| 58.H  | 1.517794  | 0.428096  | -3.394253 |
| 59.AI | 0.157760  | 5.038919  | 0.792606  |
| 60.C  | 0.365062  | 4.301682  | 2.583962  |
| 61.C  | -1.168197 | 6.304226  | 0.120621  |
| 62.H  | -1.060812 | 6.536236  | -0.948805 |
| 63.H  | -1.108585 | 7.258886  | 0.664193  |
| 64.H  | -2.190442 | 5.925566  | 0.268178  |
| 65.H  | 1.218937  | 3.615961  | 2.676792  |
| 66.H  | -0.533547 | 3.751042  | 2.898749  |
| 67.H  | 0.513561  | 5.103962  | 3.321893  |

Diels-Alder adduct 3, Me<sub>2</sub>Al complexed (16a)

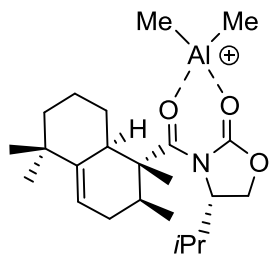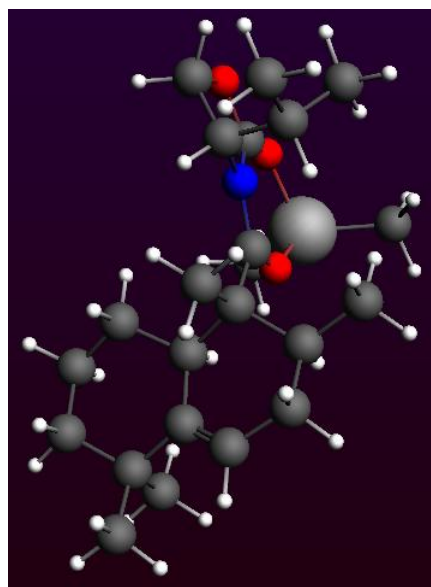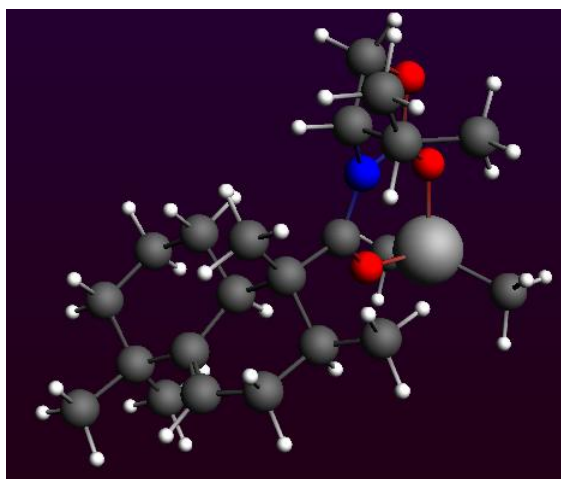

ADF total bond energy: -8628.15 kcal/mol; Entropy: 167.975 cal/mole-K; Internal Energy: 369.673 kcal/mole

|      |          |           |           |
|------|----------|-----------|-----------|
| 1.O  | 6.102669 | 4.978419  | 0.865728  |
| 2.O  | 6.618609 | 7.432118  | 0.146659  |
| 3.O  | 8.609315 | 7.628761  | -0.806586 |
| 4.N  | 7.994375 | 5.534819  | -0.256705 |
| 5.C  | 7.643059 | 3.183021  | 0.825331  |
| 6.C  | 6.497612 | 2.226851  | 0.304841  |
| 7.H  | 5.584658 | 2.552168  | 0.823474  |
| 8.C  | 6.799479 | 0.795910  | 0.753732  |
| 9.H  | 5.892710 | 0.192586  | 0.584769  |
| 10.H | 7.565379 | 0.333044  | 0.105887  |
| 11.C | 7.179405 | 0.697010  | 2.199187  |
| 12.H | 7.136092 | -0.301845 | 2.632174  |
| 13.C | 7.494773 | 1.741401  | 2.980889  |
| 14.C | 7.633795 | 1.596864  | 4.509282  |
| 15.C | 8.773904 | 2.492327  | 5.055100  |
| 16.H | 8.752916 | 2.452537  | 6.153743  |
| 17.H | 9.740635 | 2.061812  | 4.745711  |
| 18.C | 8.699570 | 3.939363  | 4.573124  |
| 19.H | 7.785638 | 4.427636  | 4.943256  |
| 20.H | 9.543974 | 4.515586  | 4.976288  |
| 21.C | 8.736846 | 3.972486  | 3.045466  |
| 22.H | 9.703989 | 3.557636  | 2.725061  |
| 23.H | 8.697546 | 5.014131  | 2.684351  |
| 24.C | 7.581296 | 3.160182  | 2.423118  |
| 25.H | 6.645533 | 3.673373  | 2.694208  |
| 26.C | 9.014917 | 2.689584  | 0.345860  |
| 27.H | 9.066944 | 2.567869  | -0.741587 |
| 28.H | 9.197713 | 1.708235  | 0.796229  |

|       |           |           |           |
|-------|-----------|-----------|-----------|
| 29.H  | 9.837254  | 3.329785  | 0.677361  |
| 30.C  | 6.242789  | 2.293336  | -1.203070 |
| 31.H  | 5.959721  | 3.300210  | -1.540755 |
| 32.H  | 5.411539  | 1.626644  | -1.466317 |
| 33.H  | 7.113270  | 1.959103  | -1.784229 |
| 34.C  | 6.285134  | 2.019058  | 5.149173  |
| 35.H  | 5.477215  | 1.360671  | 4.805502  |
| 36.H  | 6.002523  | 3.051154  | 4.906013  |
| 37.H  | 6.348457  | 1.941172  | 6.243457  |
| 38.C  | 7.928237  | 0.149279  | 4.936750  |
| 39.H  | 7.094064  | -0.528922 | 4.716875  |
| 40.H  | 8.089859  | 0.117091  | 6.022420  |
| 41.H  | 8.831635  | -0.240089 | 4.448687  |
| 42.C  | 7.225019  | 4.600824  | 0.448683  |
| 43.C  | 7.651000  | 6.898601  | -0.275352 |
| 44.C  | 9.762159  | 6.781843  | -1.117249 |
| 45.H  | 10.505091 | 6.948939  | -0.328943 |
| 46.H  | 10.154255 | 7.115002  | -2.081102 |
| 47.C  | 9.198930  | 5.355776  | -1.140450 |
| 48.H  | 9.901398  | 4.672745  | -0.664619 |
| 49.C  | 8.830324  | 4.824862  | -2.544662 |
| 50.H  | 8.302667  | 3.873987  | -2.375684 |
| 51.C  | 7.896344  | 5.744897  | -3.340557 |
| 52.H  | 7.647602  | 5.274308  | -4.299230 |
| 53.H  | 8.362272  | 6.713120  | -3.570328 |
| 54.H  | 6.945593  | 5.935058  | -2.824388 |
| 55.C  | 10.119304 | 4.514626  | -3.320002 |
| 56.H  | 10.694914 | 5.424027  | -3.542961 |
| 57.H  | 9.873490  | 4.048533  | -4.281449 |
| 58.H  | 10.773739 | 3.823942  | -2.771453 |
| 59.AI | 5.037240  | 6.563348  | 0.826311  |
| 60.C  | 3.757703  | 6.400913  | -0.638776 |
| 61.C  | 4.752163  | 7.159789  | 2.658327  |
| 62.H  | 5.665115  | 7.143670  | 3.269942  |
| 63.H  | 4.003010  | 6.538309  | 3.170398  |
| 64.H  | 4.368591  | 8.190721  | 2.678183  |
| 65.H  | 4.194810  | 6.024215  | -1.574678 |
| 66.H  | 3.301618  | 7.375816  | -0.866985 |
| 67.H  | 2.931416  | 5.725285  | -0.372770 |

Aluminum complexed *s-trans* pathway, first transition state (12b)

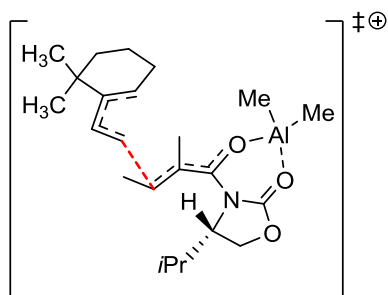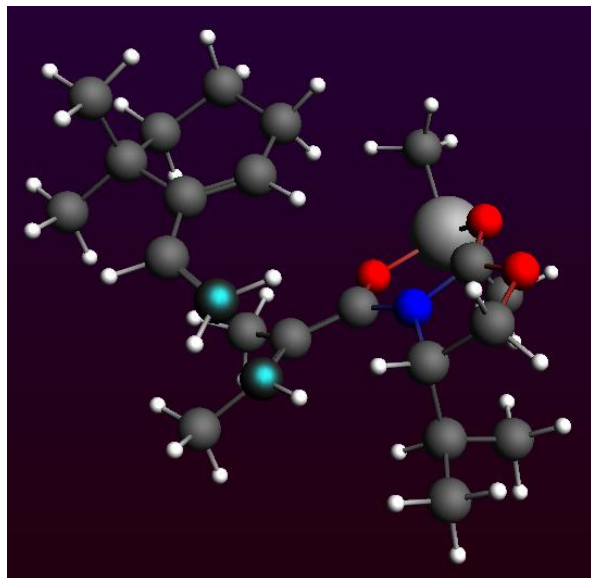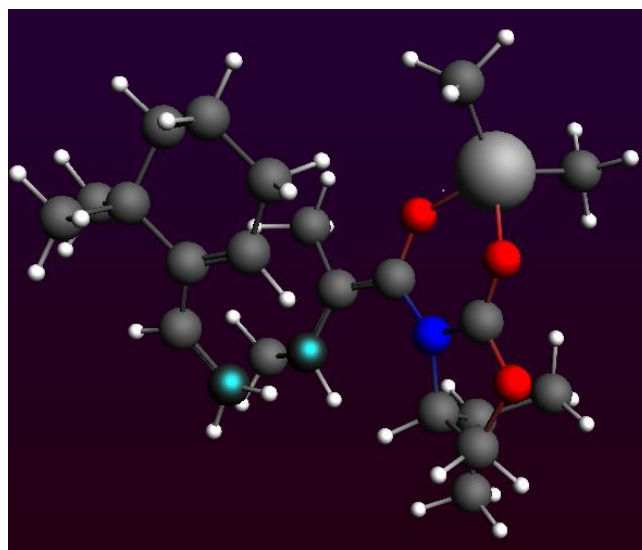

ADF total bond energy: -8601.32 kcal/mol; Entropy: 180.363 cal/mole-K; Internal Energy: 366.496 kcal/mole

|      |           |           |           |
|------|-----------|-----------|-----------|
| 1.N  | -0.590883 | -2.588501 | -0.535461 |
| 2.C  | -0.641340 | -3.898961 | -1.262600 |
| 3.C  | 0.103155  | -4.784505 | -0.246872 |
| 4.O  | 0.903534  | -3.857436 | 0.550914  |
| 5.C  | 0.448551  | -2.624508 | 0.361861  |
| 6.C  | -0.027432 | -3.824730 | -2.677843 |
| 7.H  | -1.676904 | -4.239830 | -1.351720 |
| 8.C  | 1.452159  | -3.423403 | -2.695590 |
| 9.C  | -0.264154 | -5.156043 | -3.405698 |
| 10.O | 0.955676  | -1.665279 | 0.973655  |
| 11.H | 0.794554  | -5.495270 | -0.707385 |
| 12.H | -0.569497 | -5.309931 | 0.441071  |
| 13.H | -0.600310 | -3.046506 | -3.208338 |
| 14.H | 2.087831  | -4.167110 | -2.195147 |
| 15.H | 1.628986  | -2.446875 | -2.226502 |
| 16.H | 1.802181  | -3.347198 | -3.732137 |
| 17.H | 0.290573  | -5.982400 | -2.938799 |
| 18.H | 0.082046  | -5.083752 | -4.443588 |
| 19.H | -1.327674 | -5.430340 | -3.426920 |
| 20.C | -1.126009 | -1.337219 | -0.999289 |
| 21.C | -2.426640 | -1.247834 | -1.536486 |
| 22.C | -3.427343 | -2.220442 | -1.286000 |
| 23.C | -4.568499 | -2.426150 | -2.249924 |
| 24.O | -0.344026 | -0.321037 | -0.929429 |
| 25.H | -5.035544 | -1.484889 | -2.556253 |

|       |           |           |           |
|-------|-----------|-----------|-----------|
| 26.H  | -5.341114 | -3.083131 | -1.834805 |
| 27.H  | -4.180954 | -2.908343 | -3.161678 |
| 28.H  | -3.090684 | -3.136213 | -0.802266 |
| 29.C  | -2.787245 | -0.002674 | -2.301292 |
| 30.H  | -2.991214 | -0.235231 | -3.356847 |
| 31.H  | -1.986958 | 0.739935  | -2.261517 |
| 32.H  | -3.703431 | 0.447564  | -1.891505 |
| 33.AI | 1.009808  | 0.133143  | 0.284951  |
| 34.C  | 0.265221  | 1.316710  | 1.659025  |
| 35.C  | 2.706666  | 0.391332  | -0.651835 |
| 36.H  | 2.959326  | -0.424212 | -1.344544 |
| 37.H  | 3.541988  | 0.480281  | 0.058329  |
| 38.H  | 2.695303  | 1.320507  | -1.241249 |
| 39.H  | 0.966002  | 1.431553  | 2.499428  |
| 40.H  | -0.682343 | 0.949722  | 2.079518  |
| 41.H  | 0.082997  | 2.326338  | 1.261898  |
| 42.C  | -5.099329 | 0.734949  | 0.692492  |
| 43.C  | -3.792131 | 2.476467  | 1.997399  |
| 44.C  | -4.042758 | 1.106950  | 1.479880  |
| 45.C  | -6.189159 | 1.743817  | 0.285931  |
| 46.C  | -5.671593 | 3.188674  | 0.494875  |
| 47.C  | -4.996933 | 3.409574  | 1.847517  |
| 48.C  | -5.264424 | -0.639321 | 0.306072  |
| 49.H  | -2.915903 | 2.882017  | 1.453395  |
| 50.H  | -3.448371 | 2.411660  | 3.042252  |
| 51.H  | -3.318884 | 0.344407  | 1.775888  |
| 52.H  | -4.678954 | 4.454739  | 1.951191  |
| 53.H  | -3.508161 | -1.594660 | 1.105371  |
| 54.C  | -6.570706 | 1.596673  | -1.201914 |
| 55.H  | -6.514443 | 3.882421  | 0.367106  |
| 56.H  | -4.952064 | 3.423557  | -0.306739 |
| 57.H  | -5.708791 | 3.220435  | 2.663858  |
| 58.C  | -4.391329 | -1.708627 | 0.478232  |
| 59.H  | -6.204760 | -0.875649 | -0.198027 |
| 60.H  | -4.849743 | -2.697115 | 0.516563  |
| 61.C  | -7.446217 | 1.488176  | 1.149042  |
| 62.H  | -8.250623 | 2.176294  | 0.855868  |
| 63.H  | -7.243098 | 1.630060  | 2.217721  |
| 64.H  | -7.821171 | 0.463566  | 1.018495  |
| 65.H  | -7.295883 | 2.376474  | -1.470059 |
| 66.H  | -7.043089 | 0.631785  | -1.427969 |
| 67.H  | -5.697322 | 1.719582  | -1.856736 |

Aluminum complexed *s-trans* intermediate (13b)

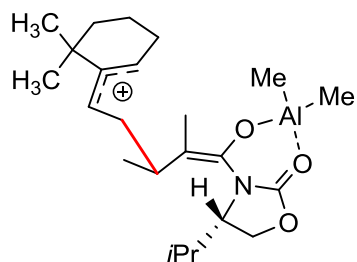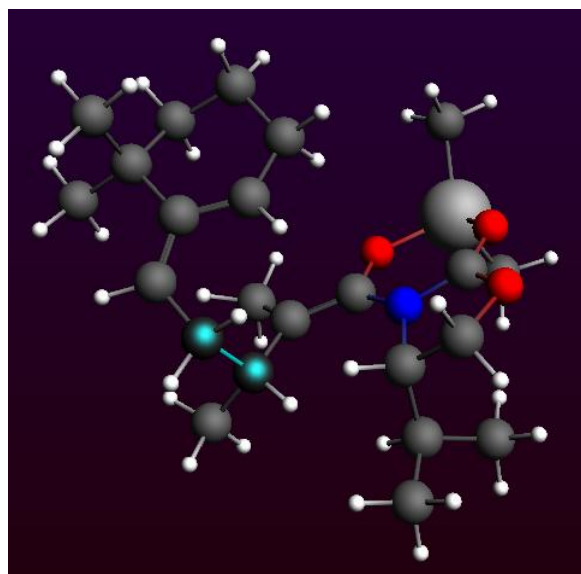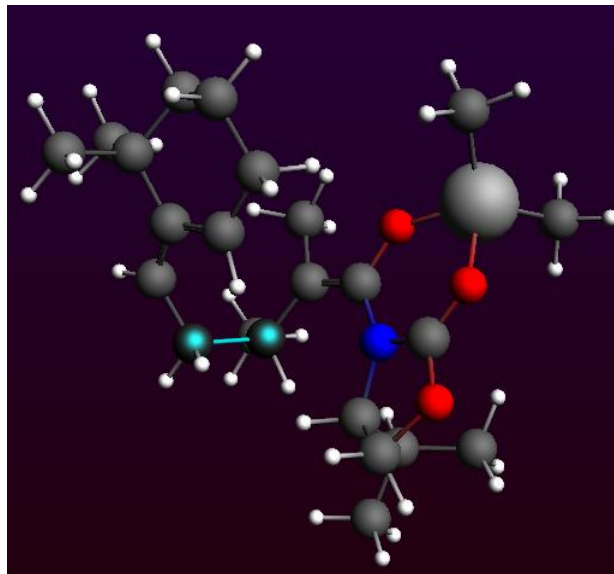

ADF total bond energy: -8605.14 kcal/mol; Entropy: 179.755 cal/mole-K; Internal Energy: 368.425 kcal/mole

|      |           |           |           |
|------|-----------|-----------|-----------|
| 1.N  | -0.827083 | -2.063491 | -0.244398 |
| 2.C  | -1.092641 | -3.498320 | -0.575172 |
| 3.C  | -0.468139 | -4.182549 | 0.650823  |
| 4.O  | 0.488767  | -3.214766 | 1.166516  |
| 5.C  | 0.212128  | -2.015406 | 0.663170  |
| 6.C  | -0.497852 | -3.922586 | -1.938594 |
| 7.H  | -2.170576 | -3.684106 | -0.567207 |
| 8.C  | 1.029575  | -3.802834 | -2.010184 |
| 9.C  | -0.973833 | -5.340527 | -2.285583 |
| 10.O | 0.880416  | -1.035702 | 1.038718  |
| 11.H | 0.085390  | -5.093761 | 0.409421  |
| 12.H | -1.193128 | -4.387773 | 1.447763  |
| 13.H | -0.919780 | -3.231561 | -2.685820 |
| 14.H | 1.532371  | -4.486937 | -1.312860 |
| 15.H | 1.381147  | -2.783290 | -1.805973 |
| 16.H | 1.372166  | -4.063256 | -3.018833 |
| 17.H | -0.572477 | -6.089020 | -1.587781 |
| 18.H | -0.629119 | -5.619238 | -3.288362 |
| 19.H | -2.069721 | -5.423275 | -2.275064 |
| 20.C | -1.355768 | -0.877551 | -0.870072 |
| 21.C | -2.551567 | -0.807146 | -1.612841 |
| 22.C | -3.452330 | -1.932707 | -2.022998 |
| 23.C | -4.042974 | -1.782122 | -3.436694 |
| 24.O | -0.674054 | 0.200755  | -0.666163 |
| 25.H | -4.730096 | -0.933386 | -3.521323 |
| 26.H | -4.598978 | -2.690258 | -3.700872 |

|       |           |           |           |
|-------|-----------|-----------|-----------|
| 27.H  | -3.249506 | -1.648927 | -4.182399 |
| 28.H  | -2.907037 | -2.878582 | -2.021686 |
| 29.C  | -2.846915 | 0.528523  | -2.239773 |
| 30.H  | -2.534511 | 0.542071  | -3.295625 |
| 31.H  | -2.337906 | 1.350660  | -1.733201 |
| 32.H  | -3.930018 | 0.715658  | -2.237902 |
| 33.AI | 0.976862  | 0.626503  | 0.088176  |
| 34.C  | 0.776090  | 2.102726  | 1.356402  |
| 35.C  | 2.392771  | 0.467840  | -1.257111 |
| 36.H  | 2.303580  | -0.421416 | -1.898322 |
| 37.H  | 3.385810  | 0.426200  | -0.785142 |
| 38.H  | 2.401225  | 1.341892  | -1.925662 |
| 39.H  | 1.740369  | 2.343788  | 1.828165  |
| 40.H  | 0.067664  | 1.895594  | 2.171101  |
| 41.H  | 0.440583  | 3.023239  | 0.854957  |
| 42.C  | -4.975287 | -0.016482 | 0.197947  |
| 43.C  | -2.960001 | 0.874276  | 1.499779  |
| 44.C  | -3.712743 | -0.188866 | 0.803201  |
| 45.C  | -5.774208 | 1.275302  | 0.443499  |
| 46.C  | -4.785250 | 2.438235  | 0.706377  |
| 47.C  | -3.770698 | 2.142766  | 1.808945  |
| 48.C  | -5.442639 | -1.027532 | -0.623136 |
| 49.H  | -2.096801 | 1.129816  | 0.843442  |
| 50.H  | -2.480177 | 0.461246  | 2.400968  |
| 51.H  | -3.335612 | -1.204029 | 0.912953  |
| 52.H  | -3.088263 | 2.991943  | 1.937595  |
| 53.H  | -4.183534 | -2.654792 | -0.081424 |
| 54.C  | -6.665375 | 1.659338  | -0.750591 |
| 55.H  | -5.365264 | 3.336347  | 0.961674  |
| 56.H  | -4.255126 | 2.669876  | -0.231788 |
| 57.H  | -4.286635 | 2.014500  | 2.770540  |
| 58.C  | -4.656626 | -2.216381 | -0.971649 |
| 59.H  | -6.396633 | -0.888016 | -1.132007 |
| 60.H  | -5.287944 | -2.984523 | -1.432828 |
| 61.C  | -6.679522 | 1.036044  | 1.675778  |
| 62.H  | -7.247509 | 1.947037  | 1.908182  |
| 63.H  | -6.104856 | 0.753059  | 2.566597  |
| 64.H  | -7.397981 | 0.229468  | 1.477674  |
| 65.H  | -7.154215 | 2.620269  | -0.544065 |
| 66.H  | -7.465318 | 0.929843  | -0.930833 |
| 67.H  | -6.083901 | 1.775064  | -1.675305 |

Aluminum complexed *s-trans* pathway, second transition state (14b)

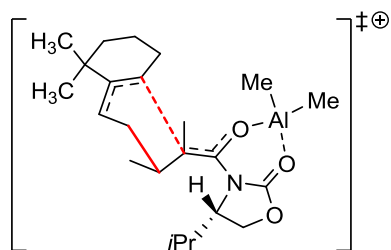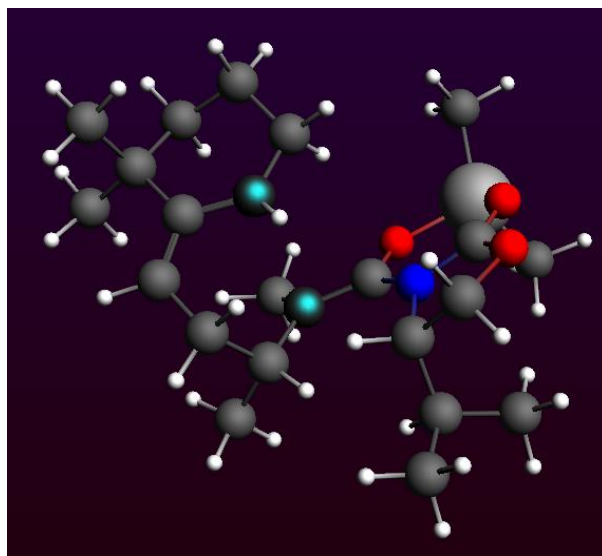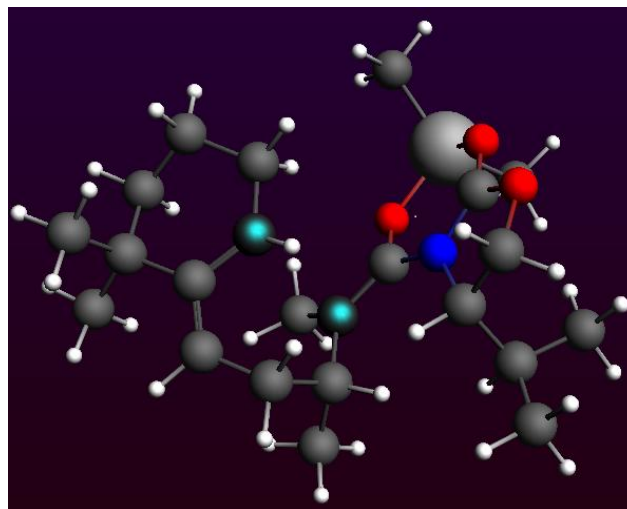

ADF total bond energy: -8605.10 kcal/mol; Entropy: 169.178 cal/mole-K; Internal Energy: 367.685 kcal/mol

|      |           |           |           |
|------|-----------|-----------|-----------|
| 1.N  | -0.821872 | -2.014244 | -0.255186 |
| 2.C  | -1.110844 | -3.453417 | -0.546539 |
| 3.C  | -0.495867 | -4.111824 | 0.697840  |
| 4.O  | 0.483020  | -3.147131 | 1.179718  |
| 5.C  | 0.223538  | -1.957897 | 0.646429  |
| 6.C  | -0.518922 | -3.923164 | -1.896620 |
| 7.H  | -2.191539 | -3.621272 | -0.536223 |
| 8.C  | 1.010410  | -3.829992 | -1.968029 |
| 9.C  | -1.017547 | -5.341705 | -2.207505 |
| 10.O | 0.905232  | -0.977341 | 0.992498  |
| 11.H | 0.038732  | -5.040788 | 0.483313  |
| 12.H | -1.221095 | -4.276758 | 1.503858  |
| 13.H | -0.927658 | -3.245520 | -2.663406 |
| 14.H | 1.501036  | -4.503110 | -1.251667 |
| 15.H | 1.378538  | -2.811182 | -1.791046 |
| 16.H | 1.350012  | -4.123065 | -2.968703 |
| 17.H | -0.630942 | -6.077915 | -1.488644 |
| 18.H | -0.674246 | -5.652648 | -3.201254 |
| 19.H | -2.114636 | -5.405562 | -2.198770 |
| 20.C | -1.345811 | -0.835544 | -0.891257 |
| 21.C | -2.583266 | -0.750461 | -1.574605 |
| 22.C | -3.454910 | -1.892470 | -2.029007 |
| 23.C | -4.016378 | -1.716349 | -3.452918 |
| 24.O | -0.641530 | 0.231556  | -0.741891 |
| 25.H | -4.734820 | -0.892592 | -3.525219 |
| 26.H | -4.532033 | -2.635751 | -3.757106 |
| 27.H | -3.213977 | -1.529825 | -4.176982 |



|       |           |           |           |
|-------|-----------|-----------|-----------|
| 28.H  | -2.874489 | -2.817253 | -2.049657 |
| 29.C  | -2.860941 | 0.587337  | -2.210868 |
| 30.H  | -2.466035 | 0.621557  | -3.238073 |
| 31.H  | -2.405834 | 1.413841  | -1.660716 |
| 32.H  | -3.942766 | 0.753659  | -2.284400 |
| 33.AI | 1.014171  | 0.666790  | 0.009929  |
| 34.C  | 0.814881  | 2.166904  | 1.248464  |
| 35.C  | 2.423581  | 0.470039  | -1.335938 |
| 36.H  | 2.325126  | -0.431360 | -1.958540 |
| 37.H  | 3.417688  | 0.430016  | -0.866111 |
| 38.H  | 2.436943  | 1.330411  | -2.021874 |
| 39.H  | 1.775897  | 2.406707  | 1.727393  |
| 40.H  | 0.093998  | 1.981488  | 2.057307  |
| 41.H  | 0.494599  | 3.081004  | 0.725879  |
| 42.C  | -4.962844 | -0.046952 | 0.152461  |
| 43.C  | -2.903652 | 0.835886  | 1.404567  |
| 44.C  | -3.662738 | -0.224698 | 0.695922  |
| 45.C  | -5.765038 | 1.234185  | 0.445183  |
| 46.C  | -4.790410 | 2.392025  | 0.770335  |
| 47.C  | -3.758561 | 2.039380  | 1.838008  |
| 48.C  | -5.463686 | -1.057662 | -0.638741 |
| 49.H  | -2.102081 | 1.190397  | 0.722501  |
| 50.H  | -2.357457 | 0.398510  | 2.253562  |
| 51.H  | -3.328422 | -1.248947 | 0.852153  |
| 52.H  | -3.103615 | 2.897002  | 2.036395  |
| 53.H  | -4.210902 | -2.699936 | -0.136226 |
| 54.C  | -6.645491 | 1.663697  | -0.742307 |
| 55.H  | -5.380974 | 3.262562  | 1.089074  |
| 56.H  | -4.273586 | 2.692936  | -0.155589 |
| 57.H  | -4.259442 | 1.805831  | 2.787634  |
| 58.C  | -4.665987 | -2.232695 | -1.023064 |
| 59.H  | -6.446265 | -0.937123 | -1.094927 |
| 60.H  | -5.285678 | -2.990318 | -1.515957 |
| 61.C  | -6.682920 | 0.939410  | 1.656355  |
| 62.H  | -7.261914 | 1.835951  | 1.916280  |
| 63.H  | -6.116232 | 0.627767  | 2.542679  |
| 64.H  | -7.391400 | 0.134782  | 1.418732  |
| 65.H  | -7.142875 | 2.612424  | -0.501731 |
| 66.H  | -7.437601 | 0.937326  | -0.963810 |
| 67.H  | -6.052895 | 1.821042  | -1.653563 |

Product for the *s-trans* pathway before conformation change (15b)

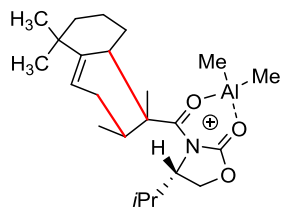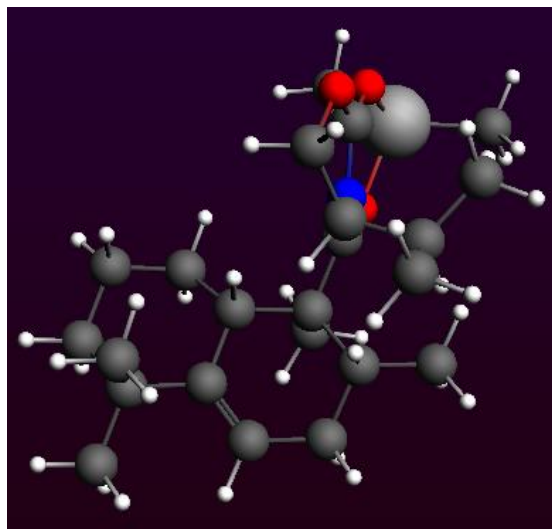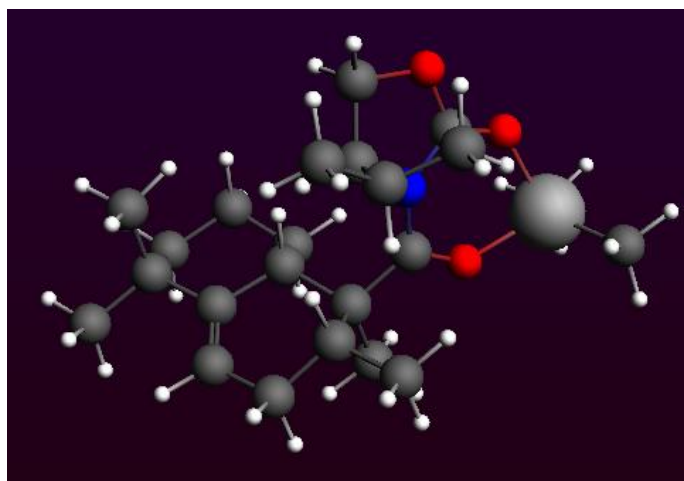

ADF total bond energy: -8628.73 kcal/mol; Entropy: 167.405 cal/mole-K; Internal Energy: 369.675 kcal/mole

|      |           |           |           |
|------|-----------|-----------|-----------|
| 1.N  | -0.810979 | -1.432528 | -0.240454 |
| 2.C  | -1.509183 | -2.761749 | -0.169669 |
| 3.C  | -0.988866 | -3.252376 | 1.186271  |
| 4.O  | 0.299536  | -2.569144 | 1.347196  |
| 5.C  | 0.336858  | -1.512324 | 0.560627  |
| 6.C  | -1.160521 | -3.689333 | -1.359404 |
| 7.H  | -2.590549 | -2.605038 | -0.131483 |
| 8.C  | 0.327260  | -4.045577 | -1.470918 |
| 9.C  | -2.041571 | -4.945806 | -1.285393 |
| 10.O | 1.288755  | -0.723703 | 0.602704  |
| 11.H | -0.787683 | -4.325498 | 1.219183  |
| 12.H | -1.617129 | -2.957687 | 2.034914  |
| 13.H | -1.442164 | -3.138748 | -2.267645 |
| 14.H | 0.685577  | -4.623971 | -0.608382 |
| 15.H | 0.968603  | -3.161028 | -1.583131 |
| 16.H | 0.487143  | -4.666124 | -2.360810 |
| 17.H | -1.807187 | -5.564373 | -0.407617 |
| 18.H | -1.873182 | -5.570448 | -2.170593 |
| 19.H | -3.110849 | -4.697275 | -1.250618 |
| 20.C | -1.167328 | -0.231979 | -0.874004 |
| 21.C | -2.594559 | 0.090848  | -1.306078 |
| 22.C | -3.083297 | -0.889693 | -2.436098 |
| 23.C | -2.157823 | -0.956107 | -3.656676 |
| 24.O | -0.275620 | 0.635710  | -1.008141 |
| 25.H | -2.144091 | -0.009534 | -4.210196 |
| 26.H | -2.513296 | -1.728137 | -4.351497 |
| 27.H | -1.117417 | -1.200231 | -3.398380 |
| 28.H | -3.155161 | -1.893804 | -1.994064 |
| 29.C | -2.603936 | 1.536139  | -1.848452 |
| 30.H | -2.066699 | 1.611578  | -2.799058 |

|       |           |           |           |
|-------|-----------|-----------|-----------|
| 31.H  | -2.136872 | 2.238729  | -1.154829 |
| 32.H  | -3.639958 | 1.852023  | -2.005435 |
| 33.AI | 1.581003  | 0.801615  | -0.546698 |
| 34.C  | 1.788293  | 2.376250  | 0.578661  |
| 35.C  | 2.634146  | 0.211834  | -2.080807 |
| 36.H  | 2.266556  | -0.712985 | -2.548296 |
| 37.H  | 3.679638  | 0.031843  | -1.789348 |
| 38.H  | 2.657063  | 0.982775  | -2.865098 |
| 39.H  | 2.770493  | 2.377315  | 1.073988  |
| 40.H  | 1.027907  | 2.449840  | 1.368804  |
| 41.H  | 1.735147  | 3.301095  | -0.014072 |
| 42.C  | -5.012246 | -0.170885 | -0.395253 |
| 43.C  | -3.302582 | 1.122182  | 0.966711  |
| 44.C  | -3.535243 | -0.033664 | -0.034515 |
| 45.C  | -5.990151 | -0.199783 | 0.794446  |
| 46.C  | -5.652268 | 0.926094  | 1.806032  |
| 47.C  | -4.179334 | 0.970576  | 2.209403  |
| 48.C  | -5.421259 | -0.333697 | -1.662643 |
| 49.H  | -3.547660 | 2.079437  | 0.486741  |
| 50.H  | -2.237958 | 1.171445  | 1.247552  |
| 51.H  | -3.255042 | -0.950549 | 0.511328  |
| 52.H  | -4.002198 | 1.814571  | 2.890218  |
| 53.H  | -4.909123 | -1.303580 | -3.487359 |
| 54.C  | -7.452224 | -0.017451 | 0.356509  |
| 55.H  | -6.290441 | 0.803961  | 2.693269  |
| 56.H  | -5.925881 | 1.893511  | 1.354955  |
| 57.H  | -3.900656 | 0.062547  | 2.767434  |
| 58.C  | -4.510770 | -0.506161 | -2.840144 |
| 59.H  | -6.488063 | -0.390317 | -1.876252 |
| 60.H  | -4.503056 | 0.395925  | -3.475191 |
| 61.C  | -5.874818 | -1.581987 | 1.487813  |
| 62.H  | -6.563381 | -1.632681 | 2.342409  |
| 63.H  | -4.865698 | -1.783775 | 1.871495  |
| 64.H  | -6.141679 | -2.385189 | 0.788449  |
| 65.H  | -8.096317 | 0.020990  | 1.244899  |
| 66.H  | -7.807605 | -0.849746 | -0.264695 |
| 67.H  | -7.592604 | 0.917842  | -0.201248 |

## The disfavored approaches for the Diels-Alder reaction

The reaction partners were brought together but not converged. From the different approaches the steric interactions are clearly visible. The carbons in the diene and dienophile involved in initial bond formation are highlighted.

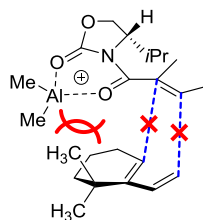

**Endo approach**  
**Disfavored**

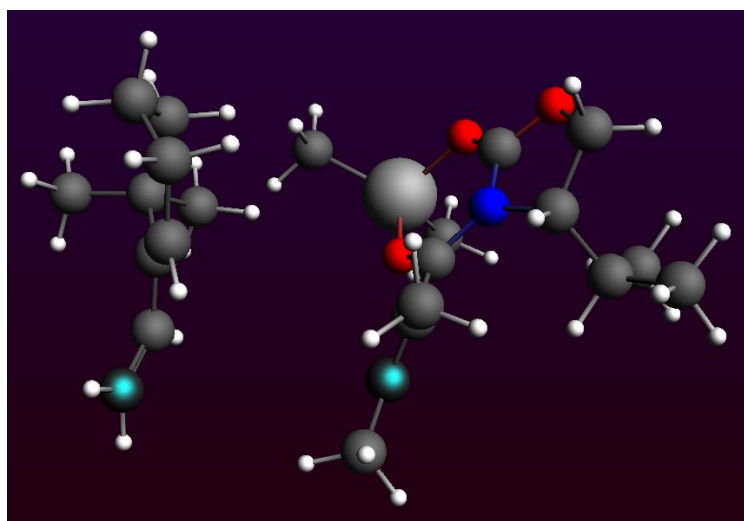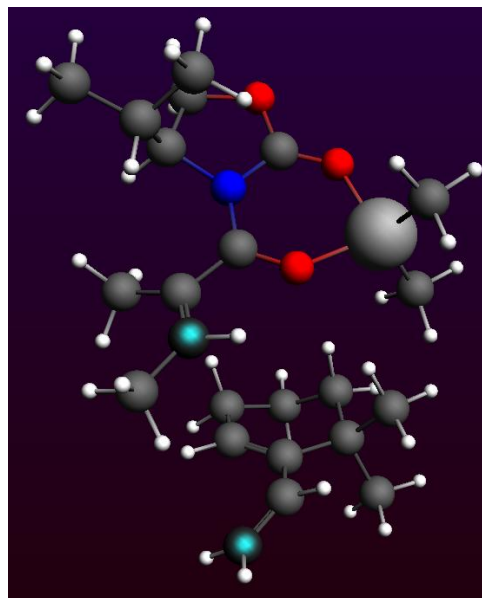

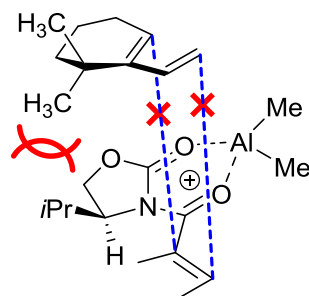

**Exo Re-face approach**  
**Disfavored**

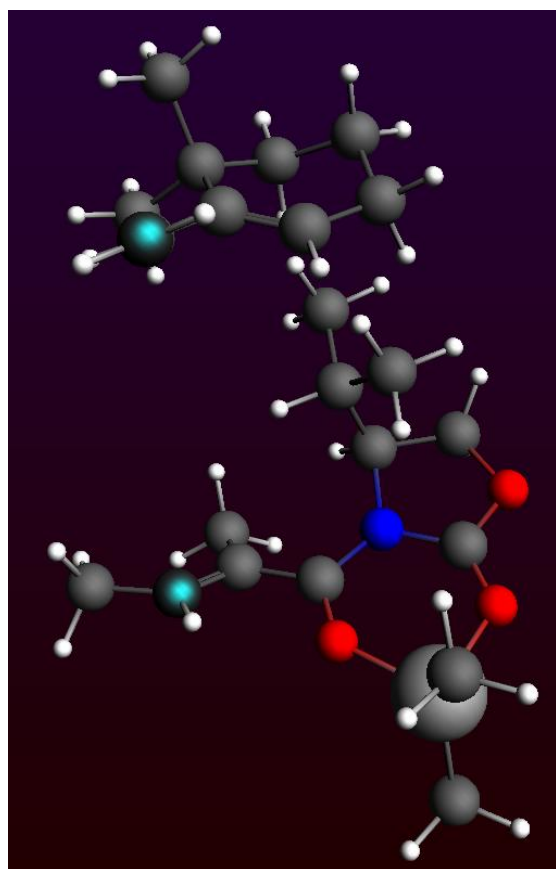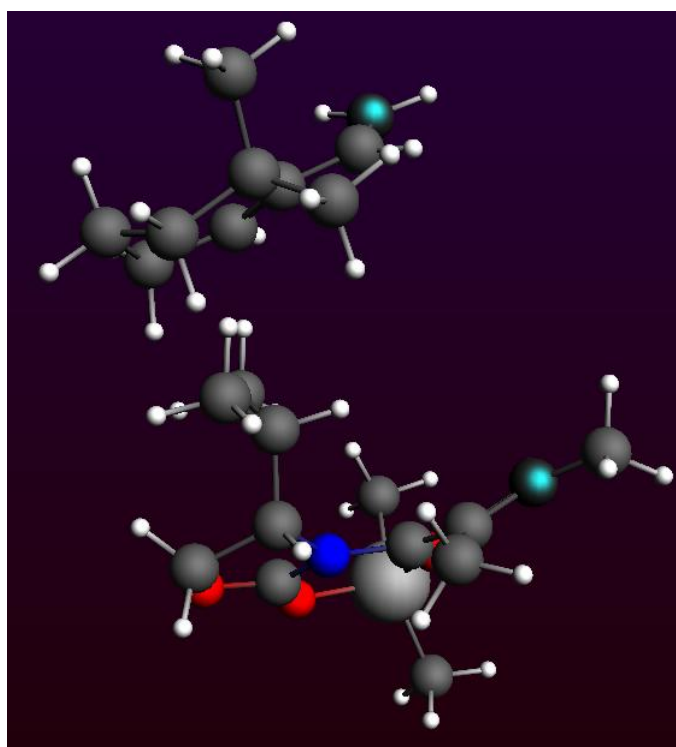

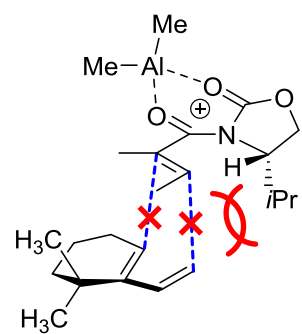

**Exo Si-face approach**  
**Disfavored**

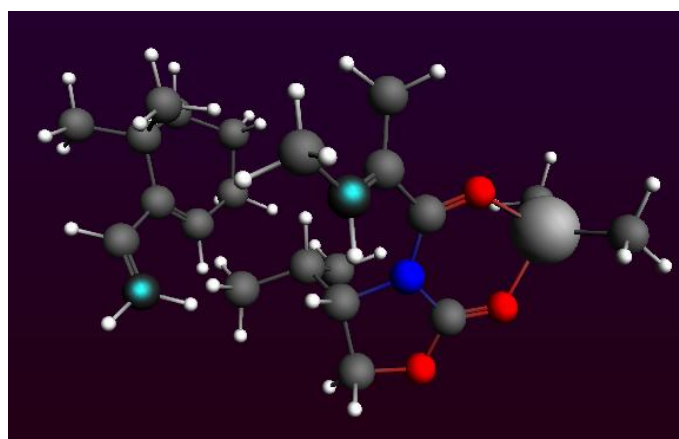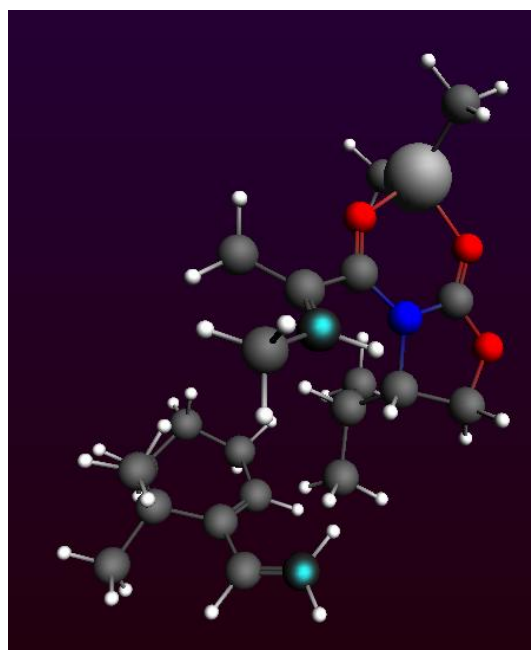

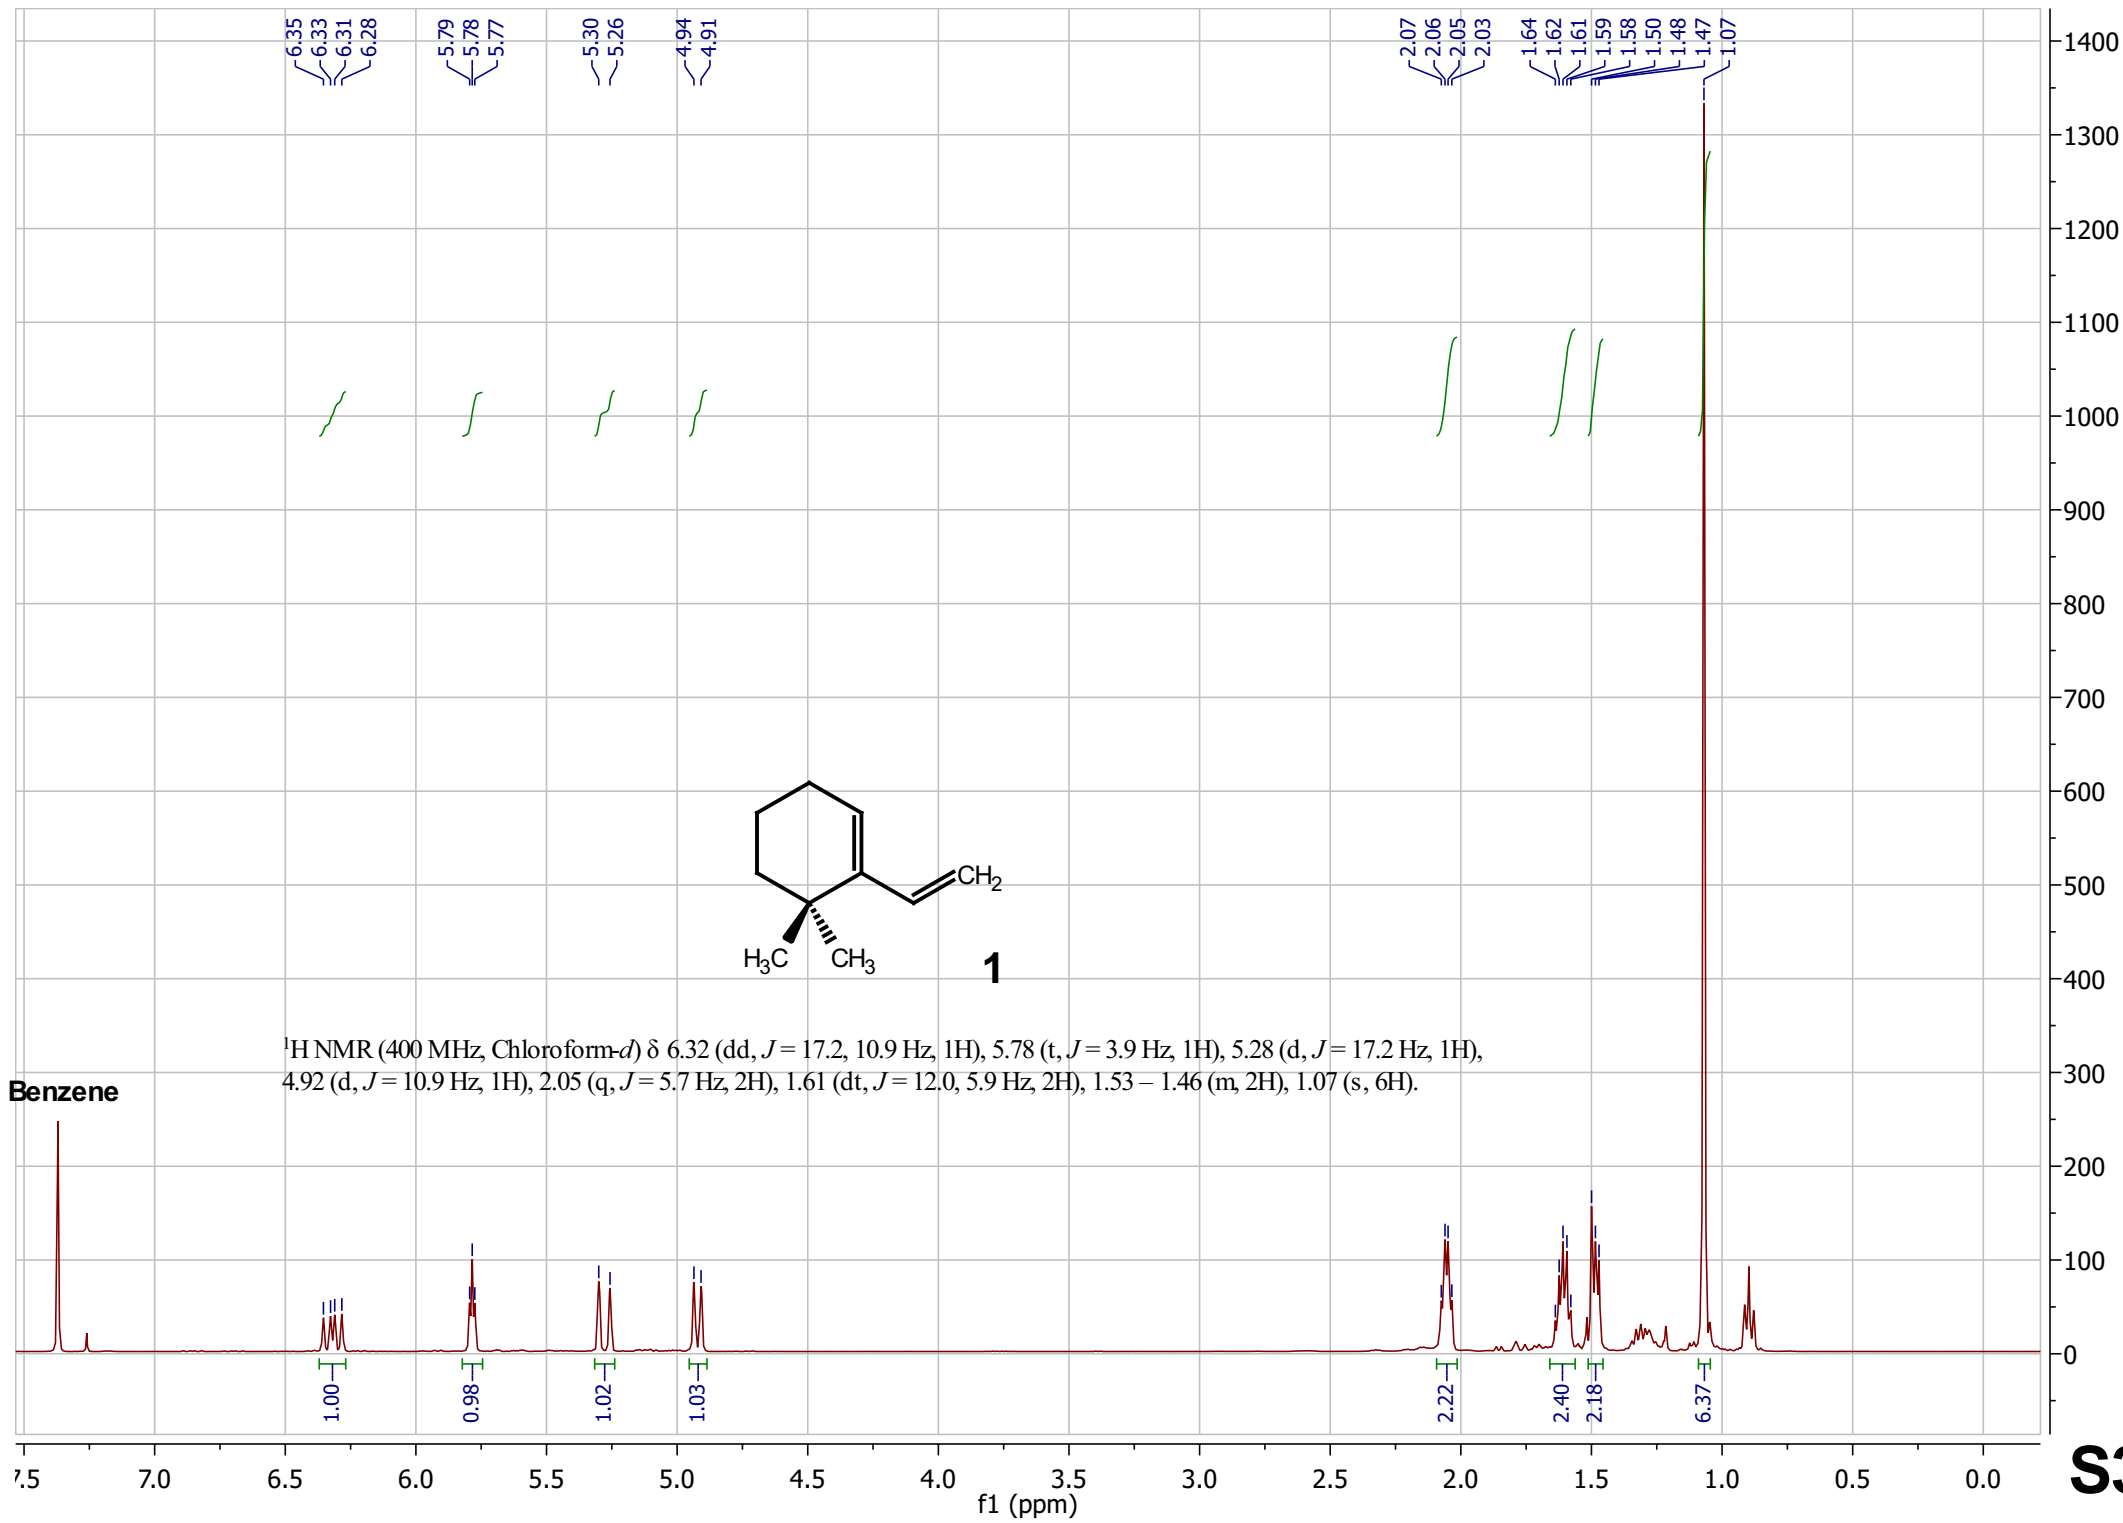

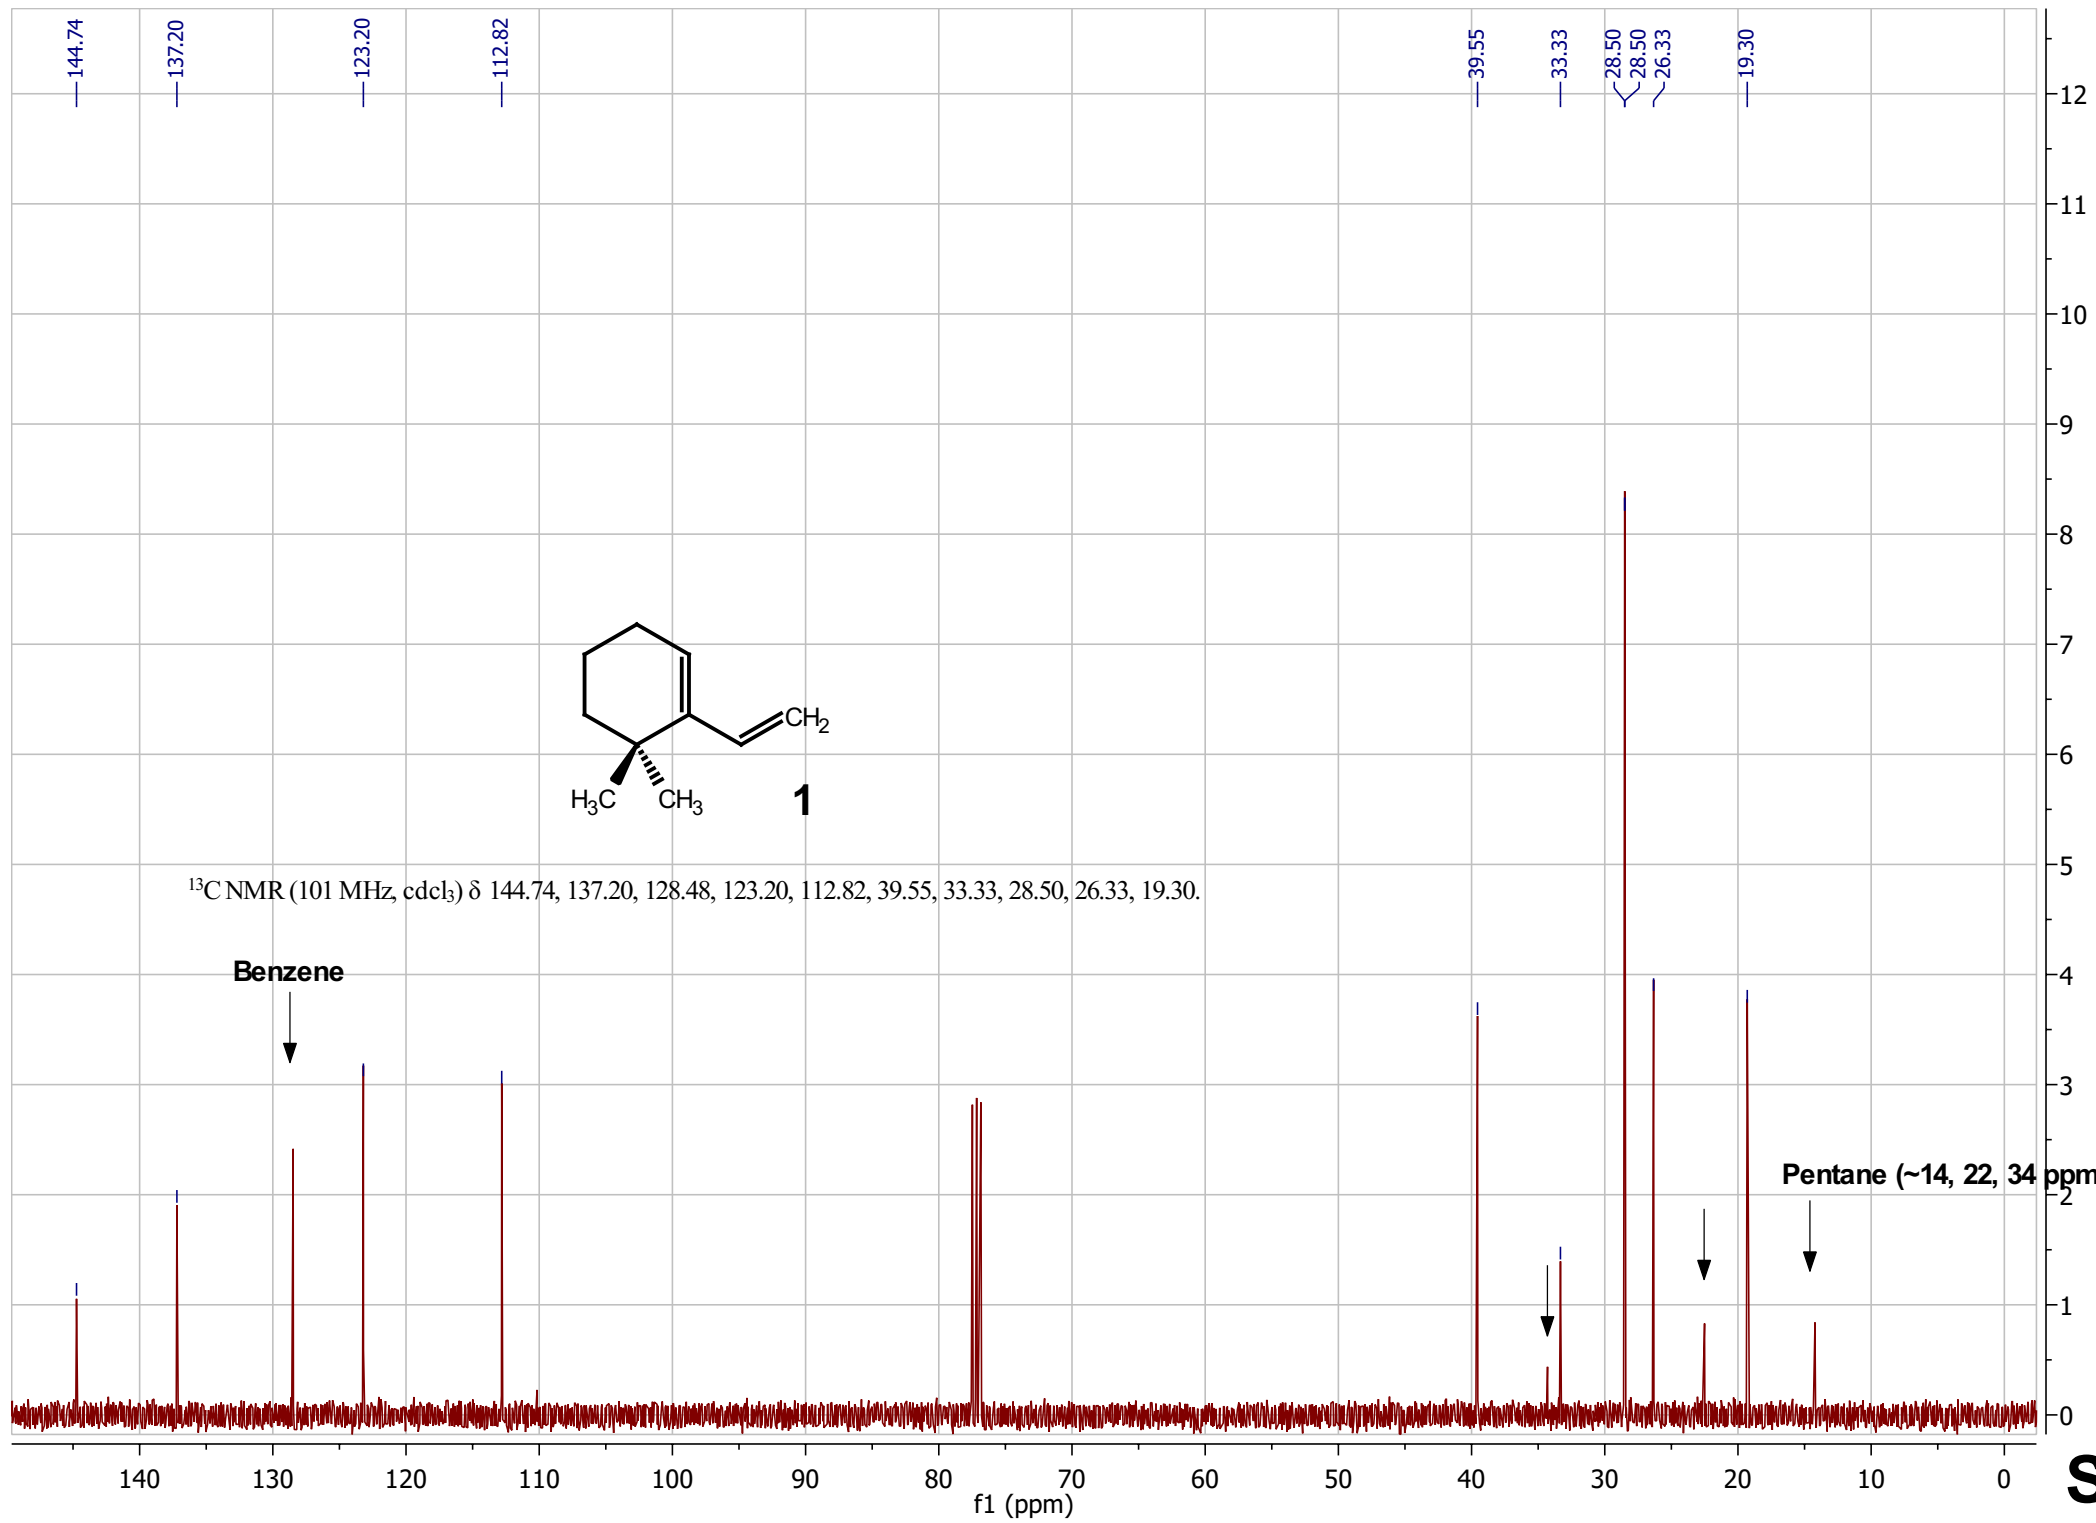



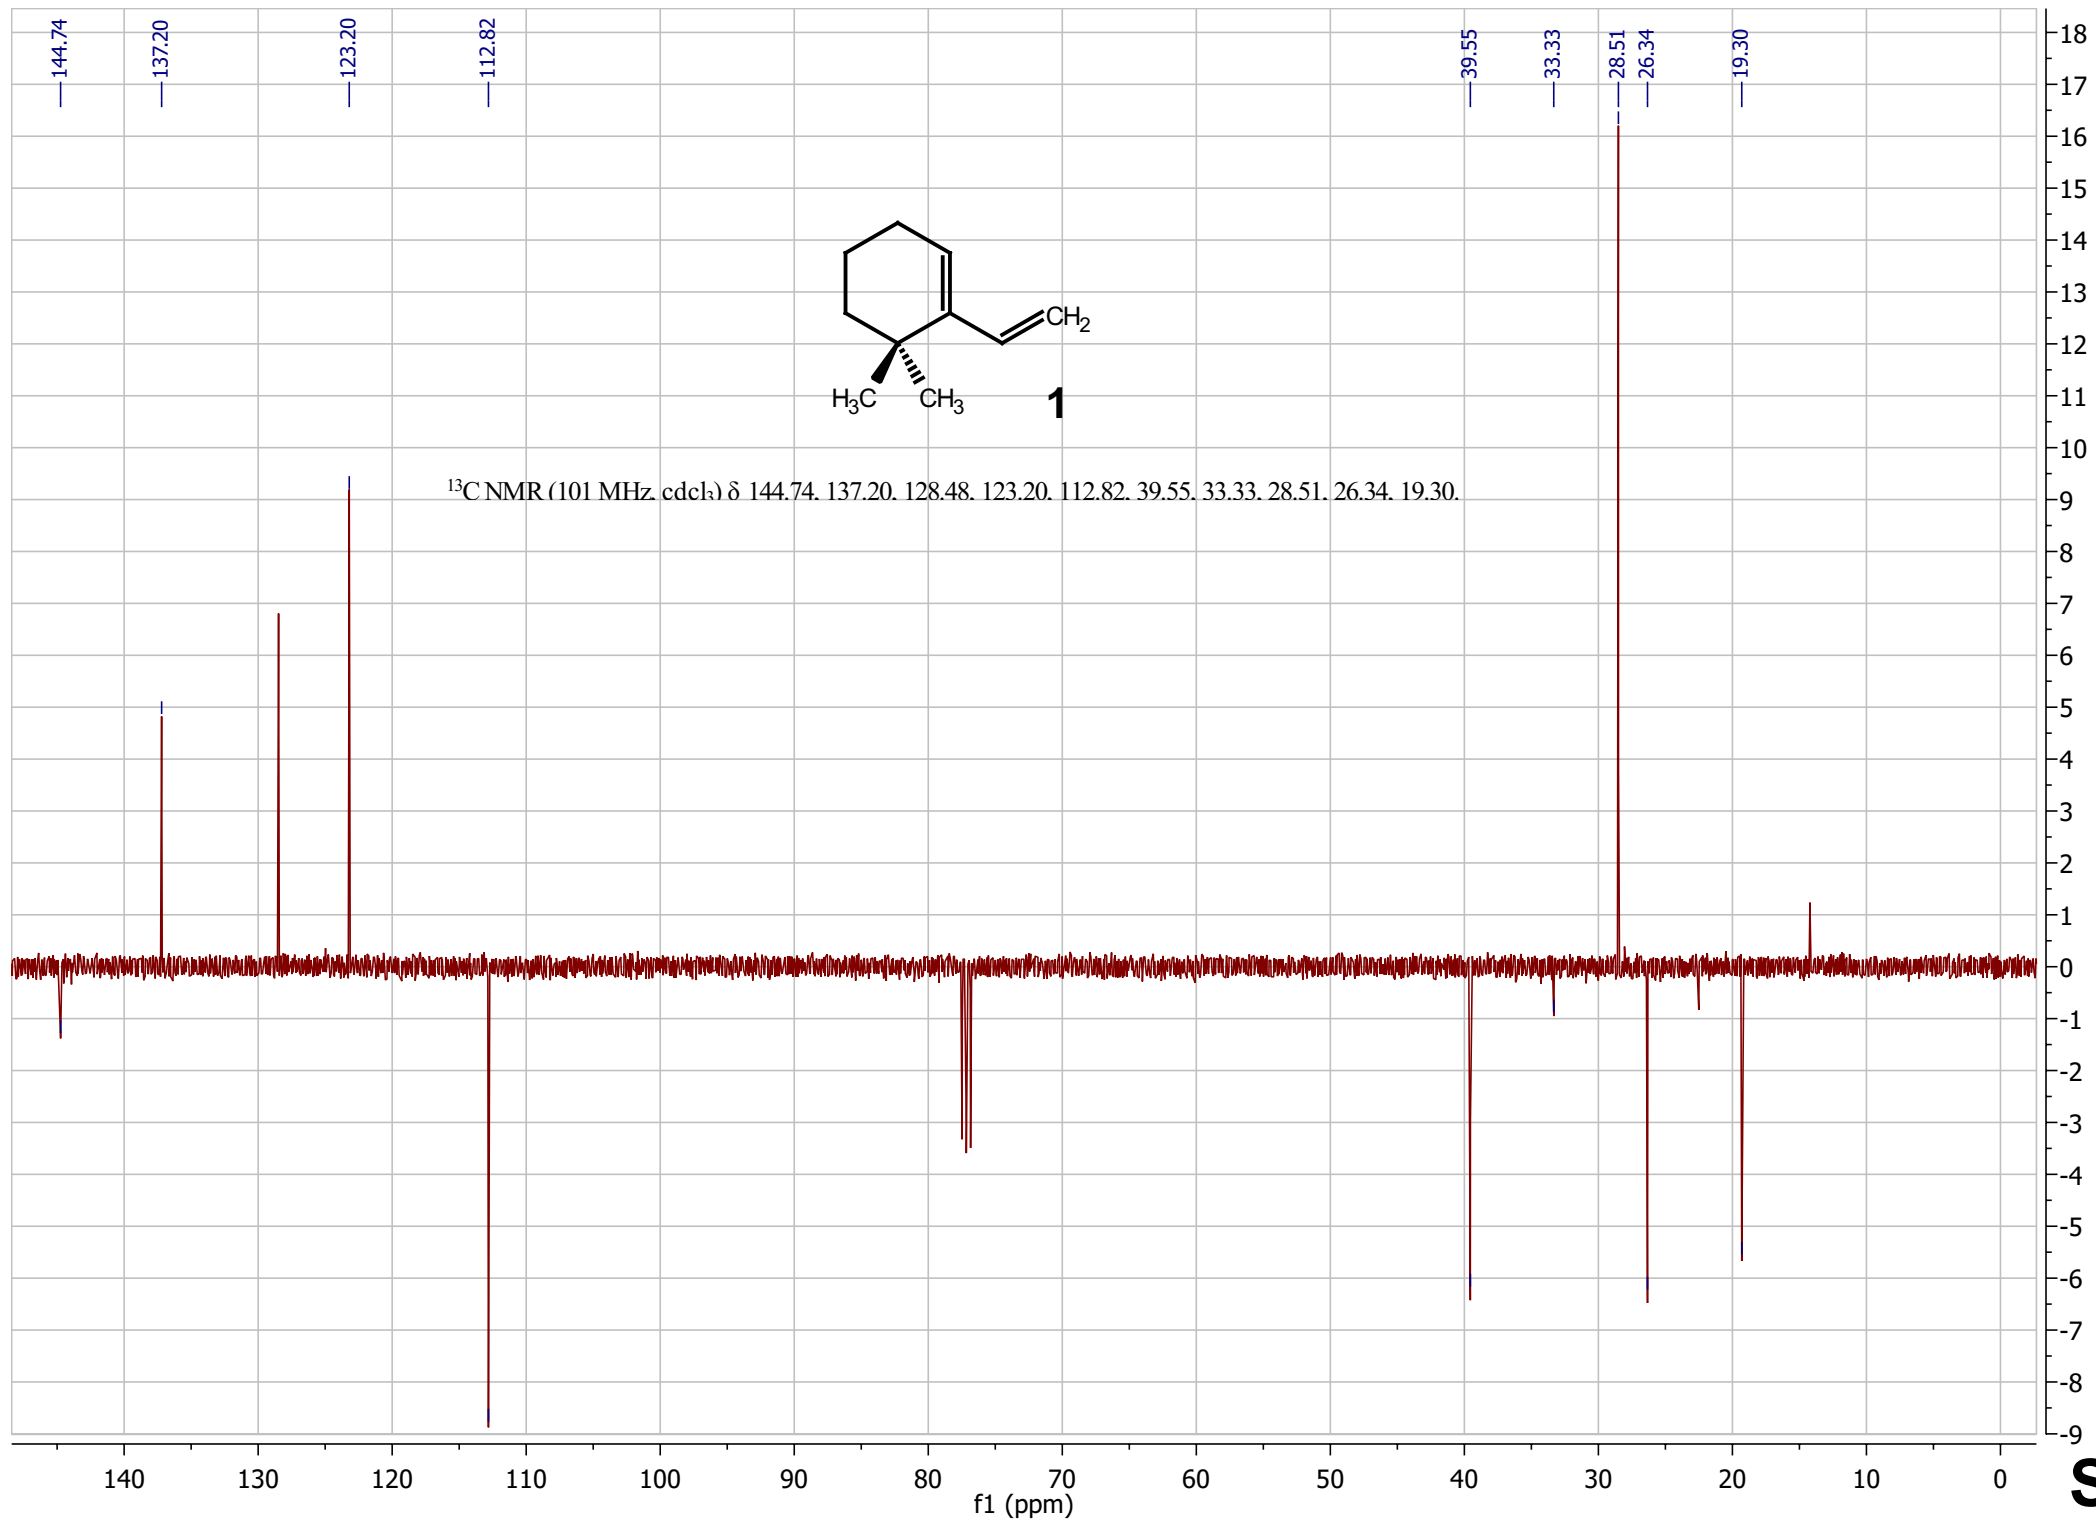

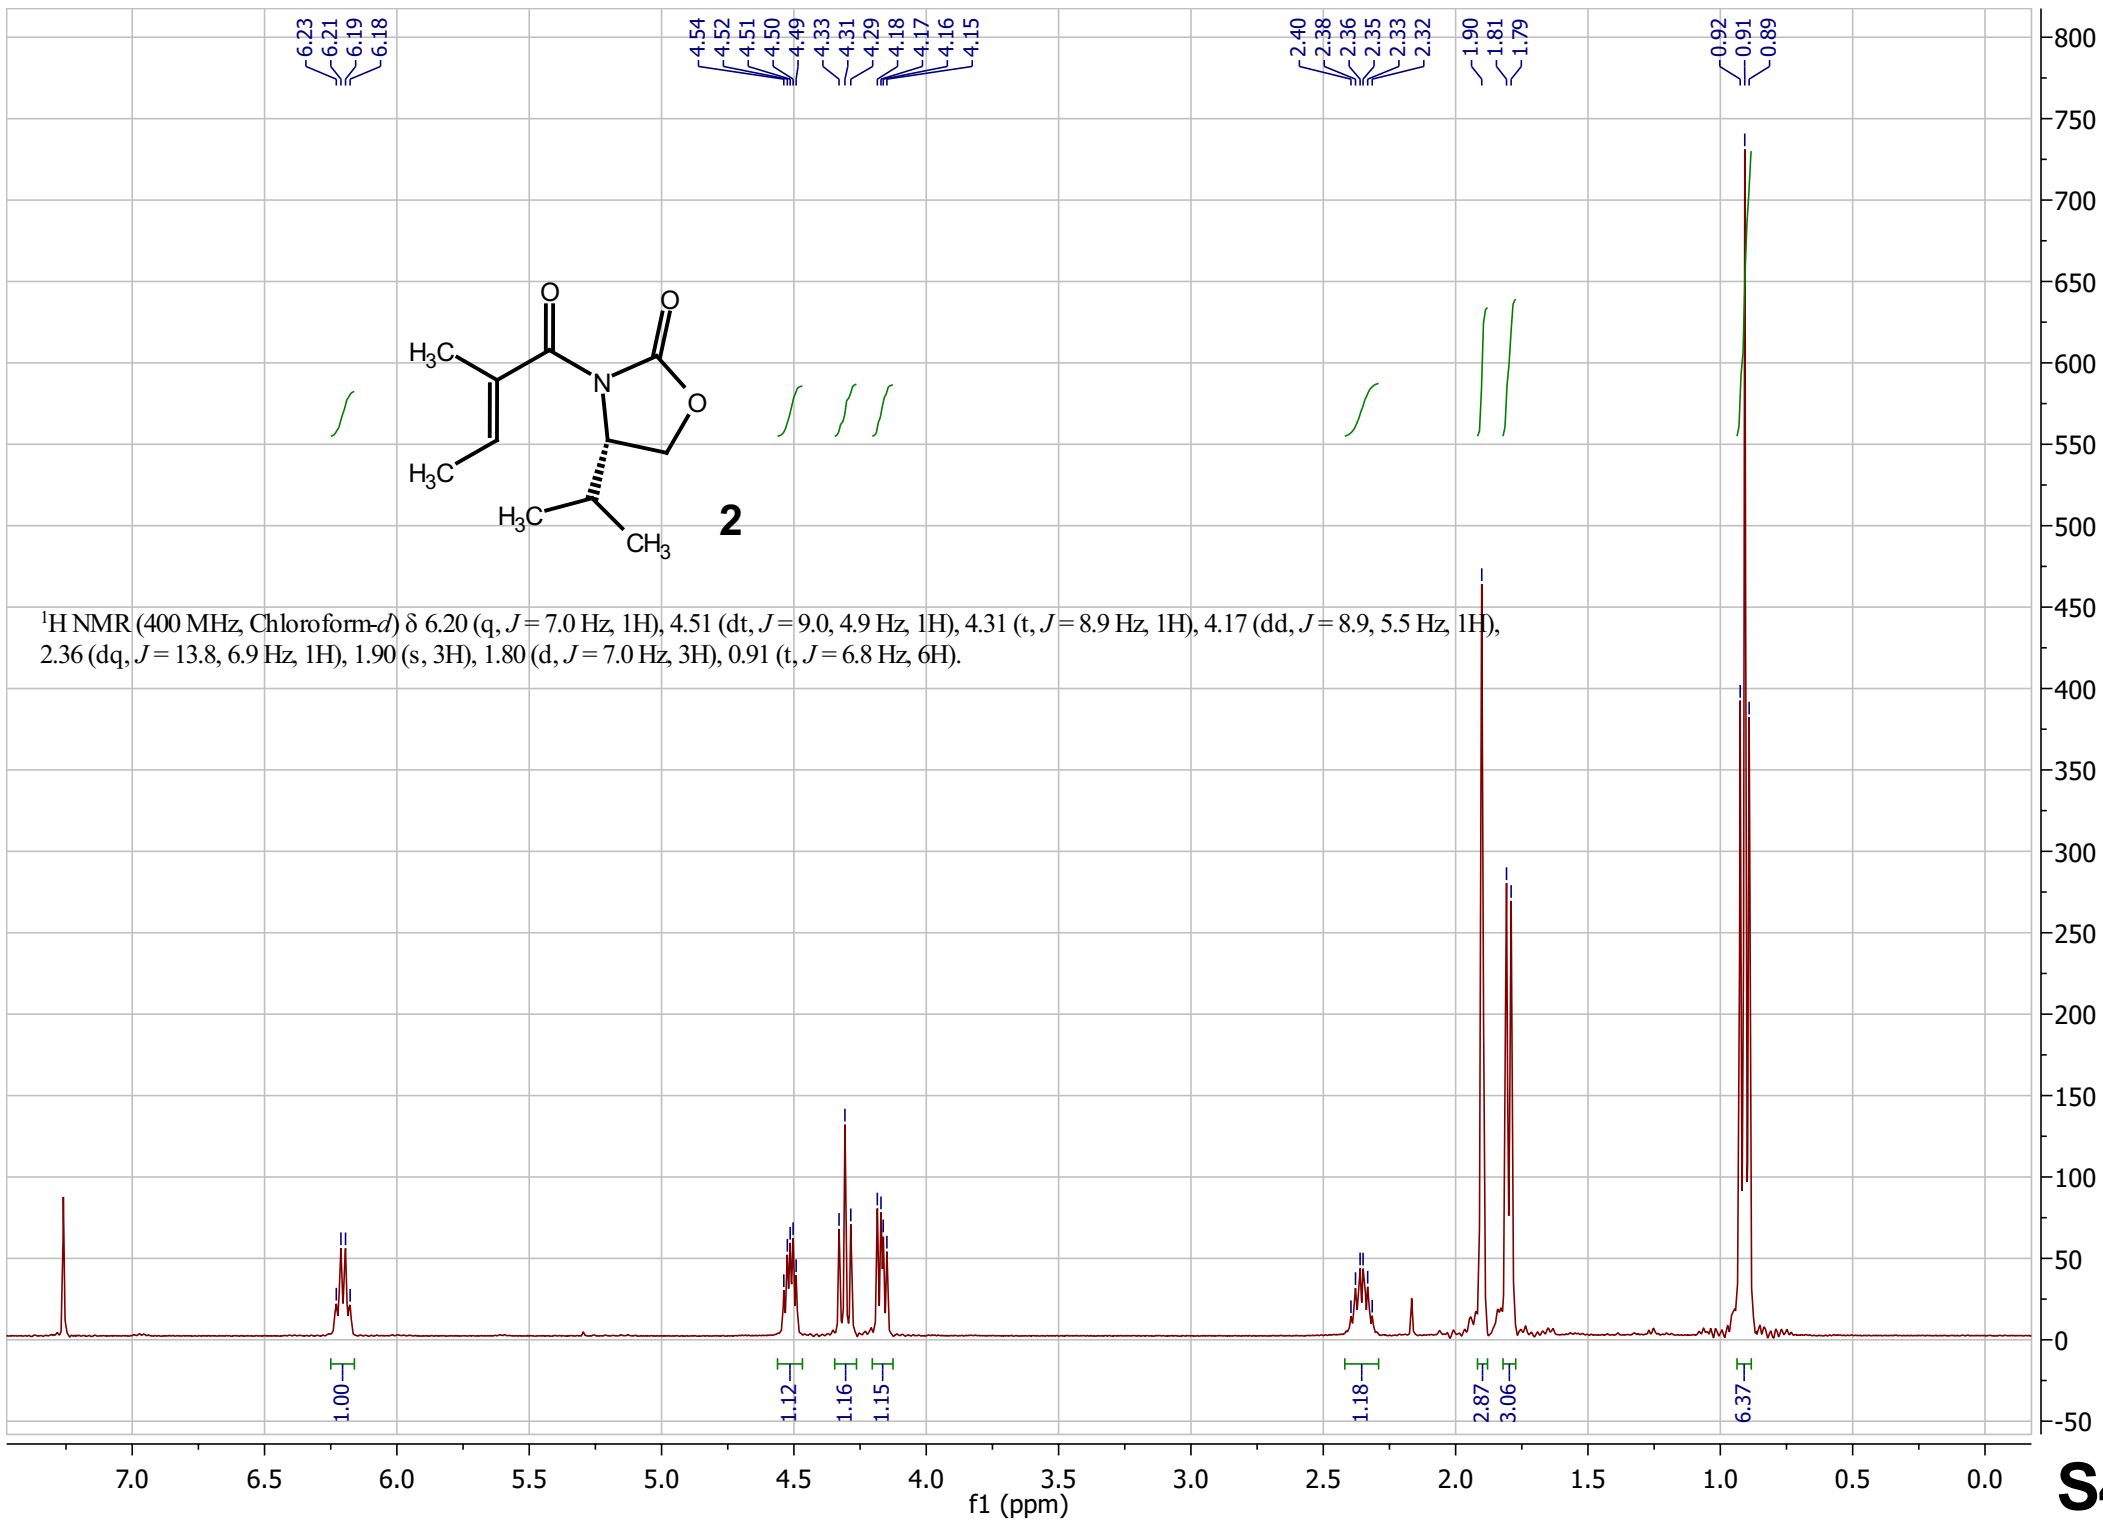

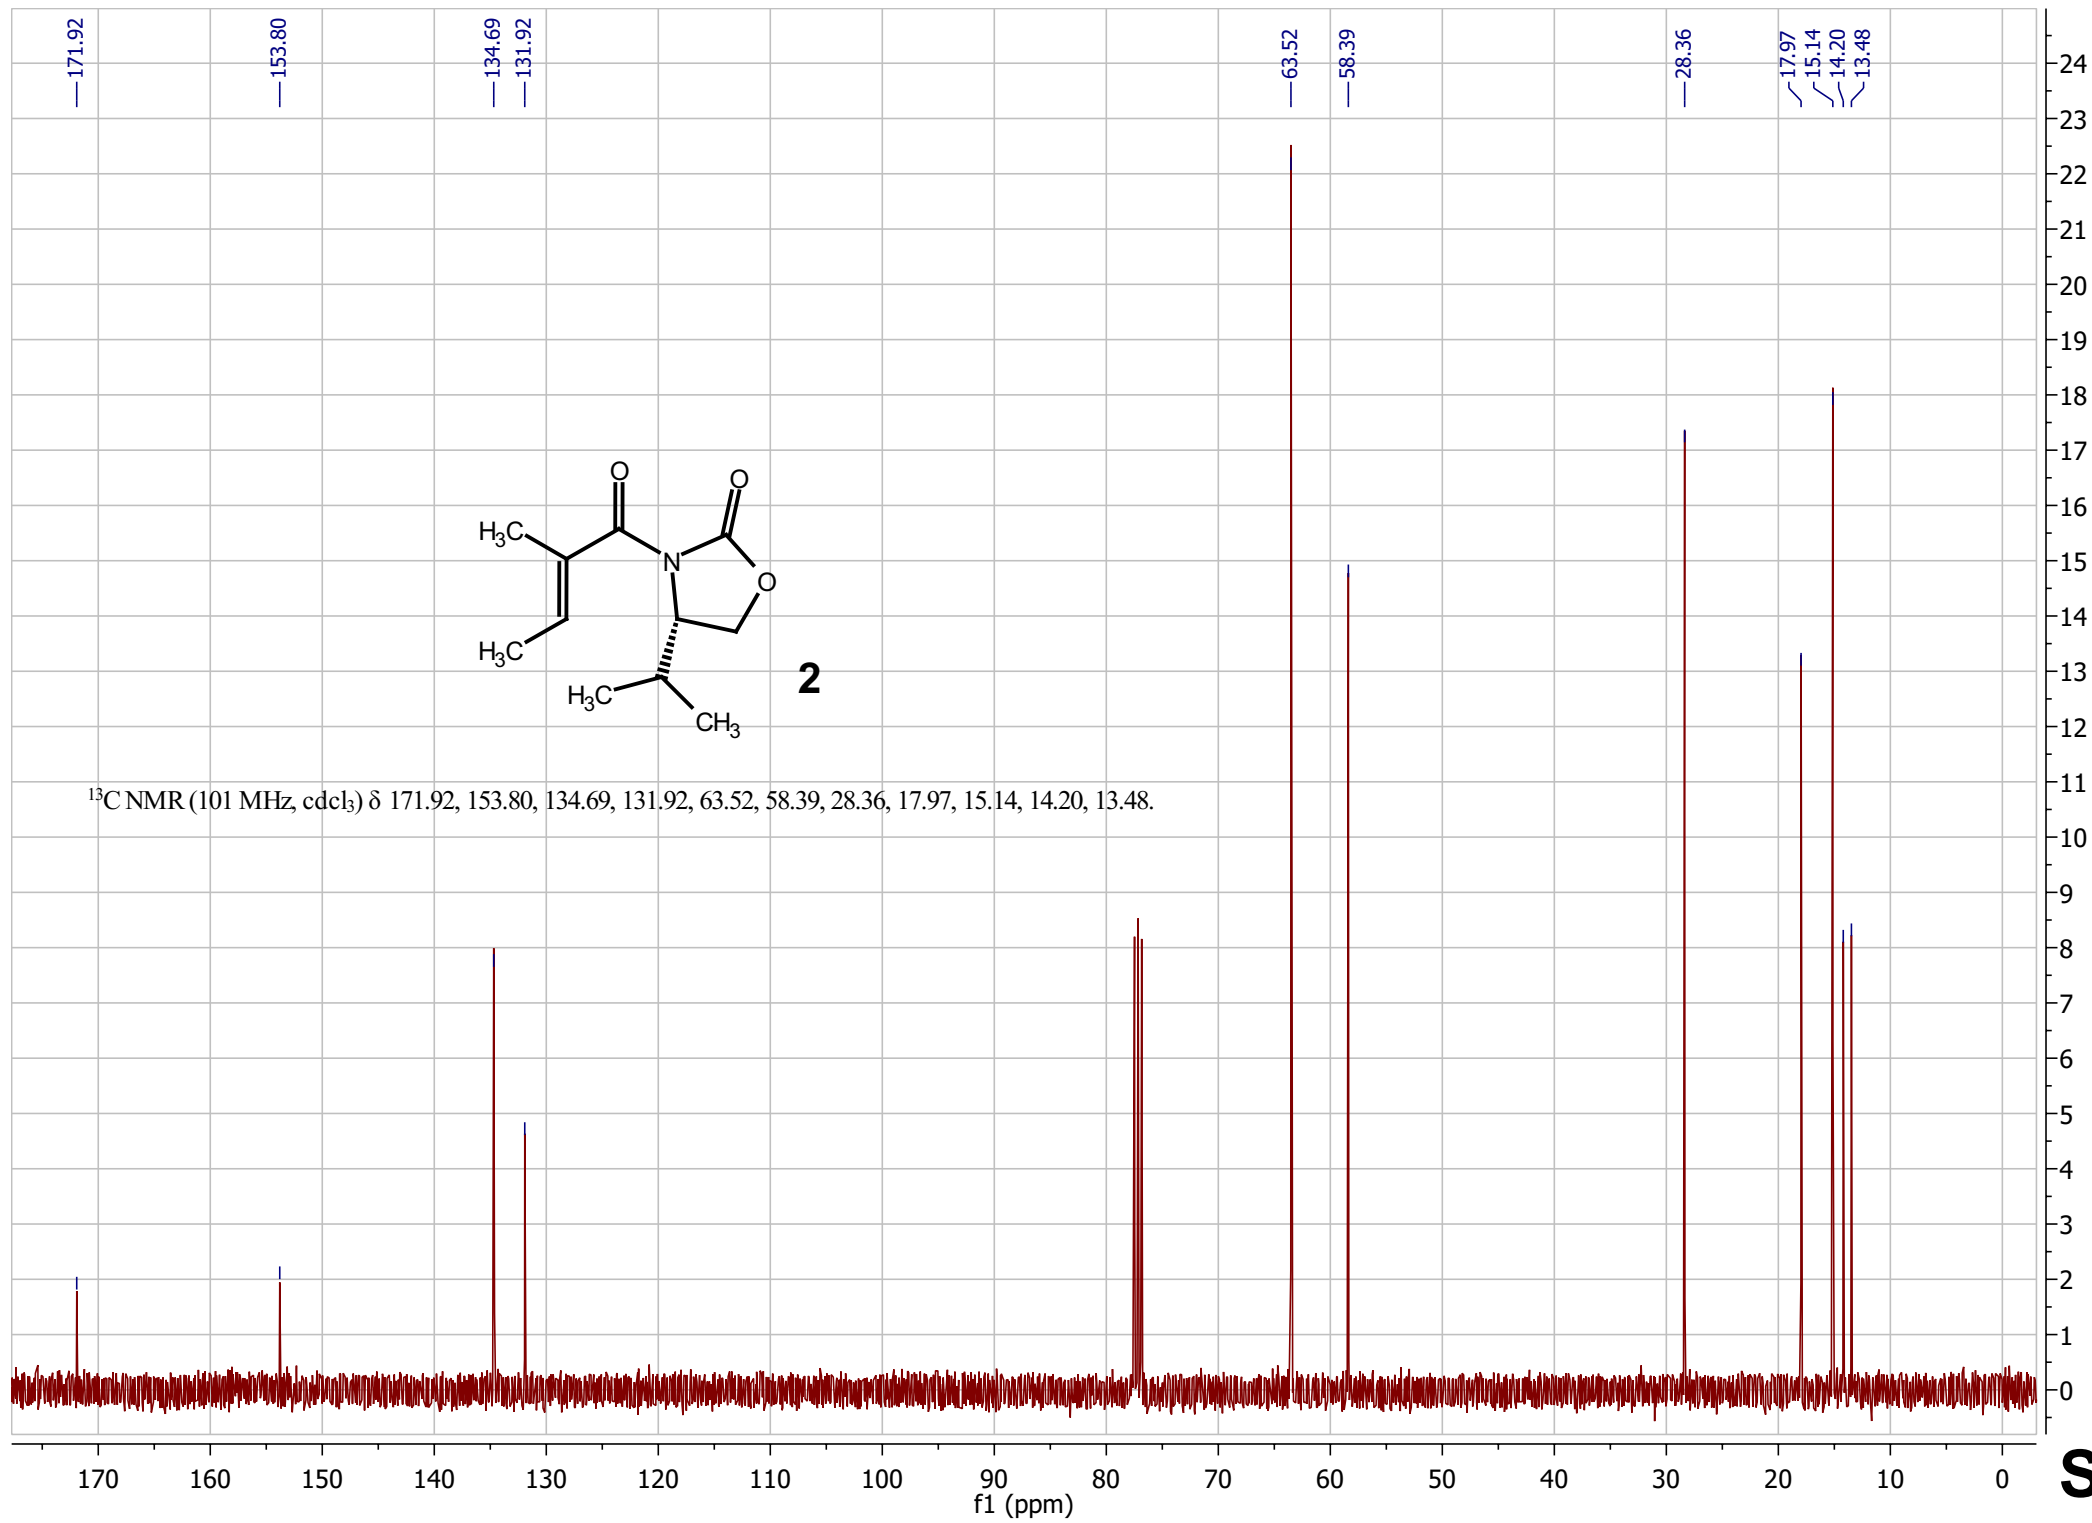

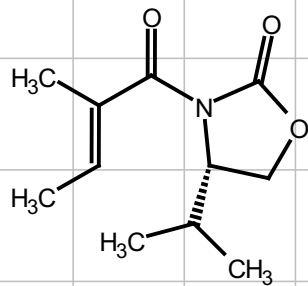

**2**

$^{13}\text{C}$  NMR (101 MHz,  $\text{cdCl}_3$ )  $\delta$  171.92, 153.80, 134.69, 131.92, 63.52, 58.39, 28.36, 17.97, 15.14, 14.20, 13.47.

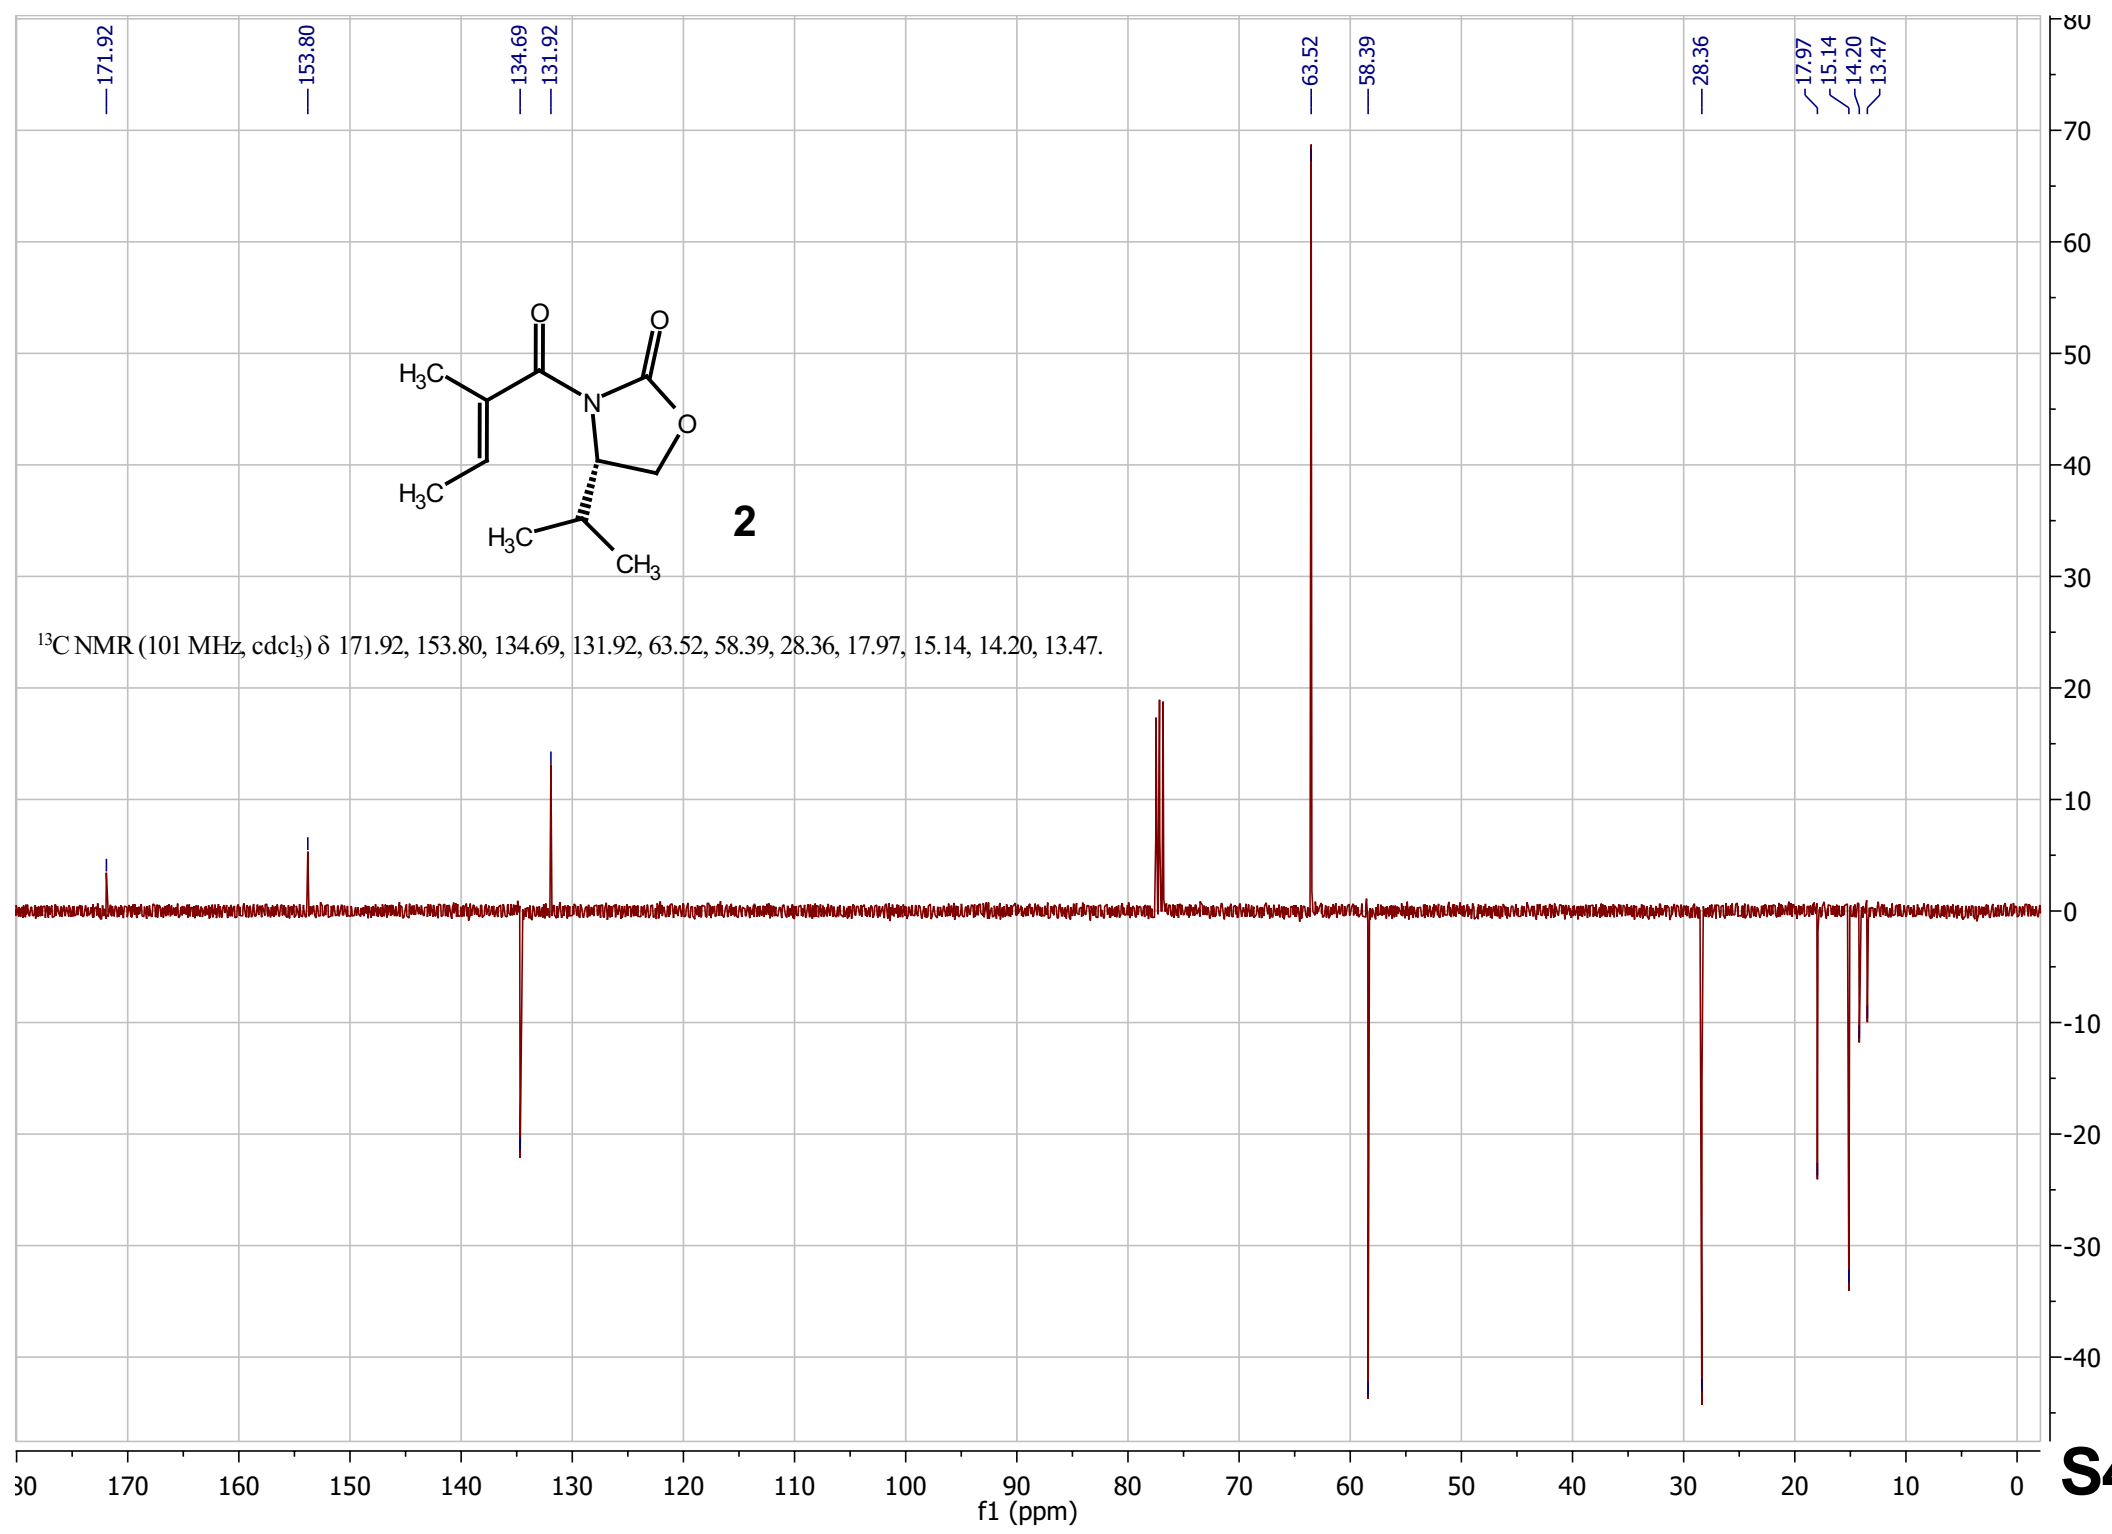

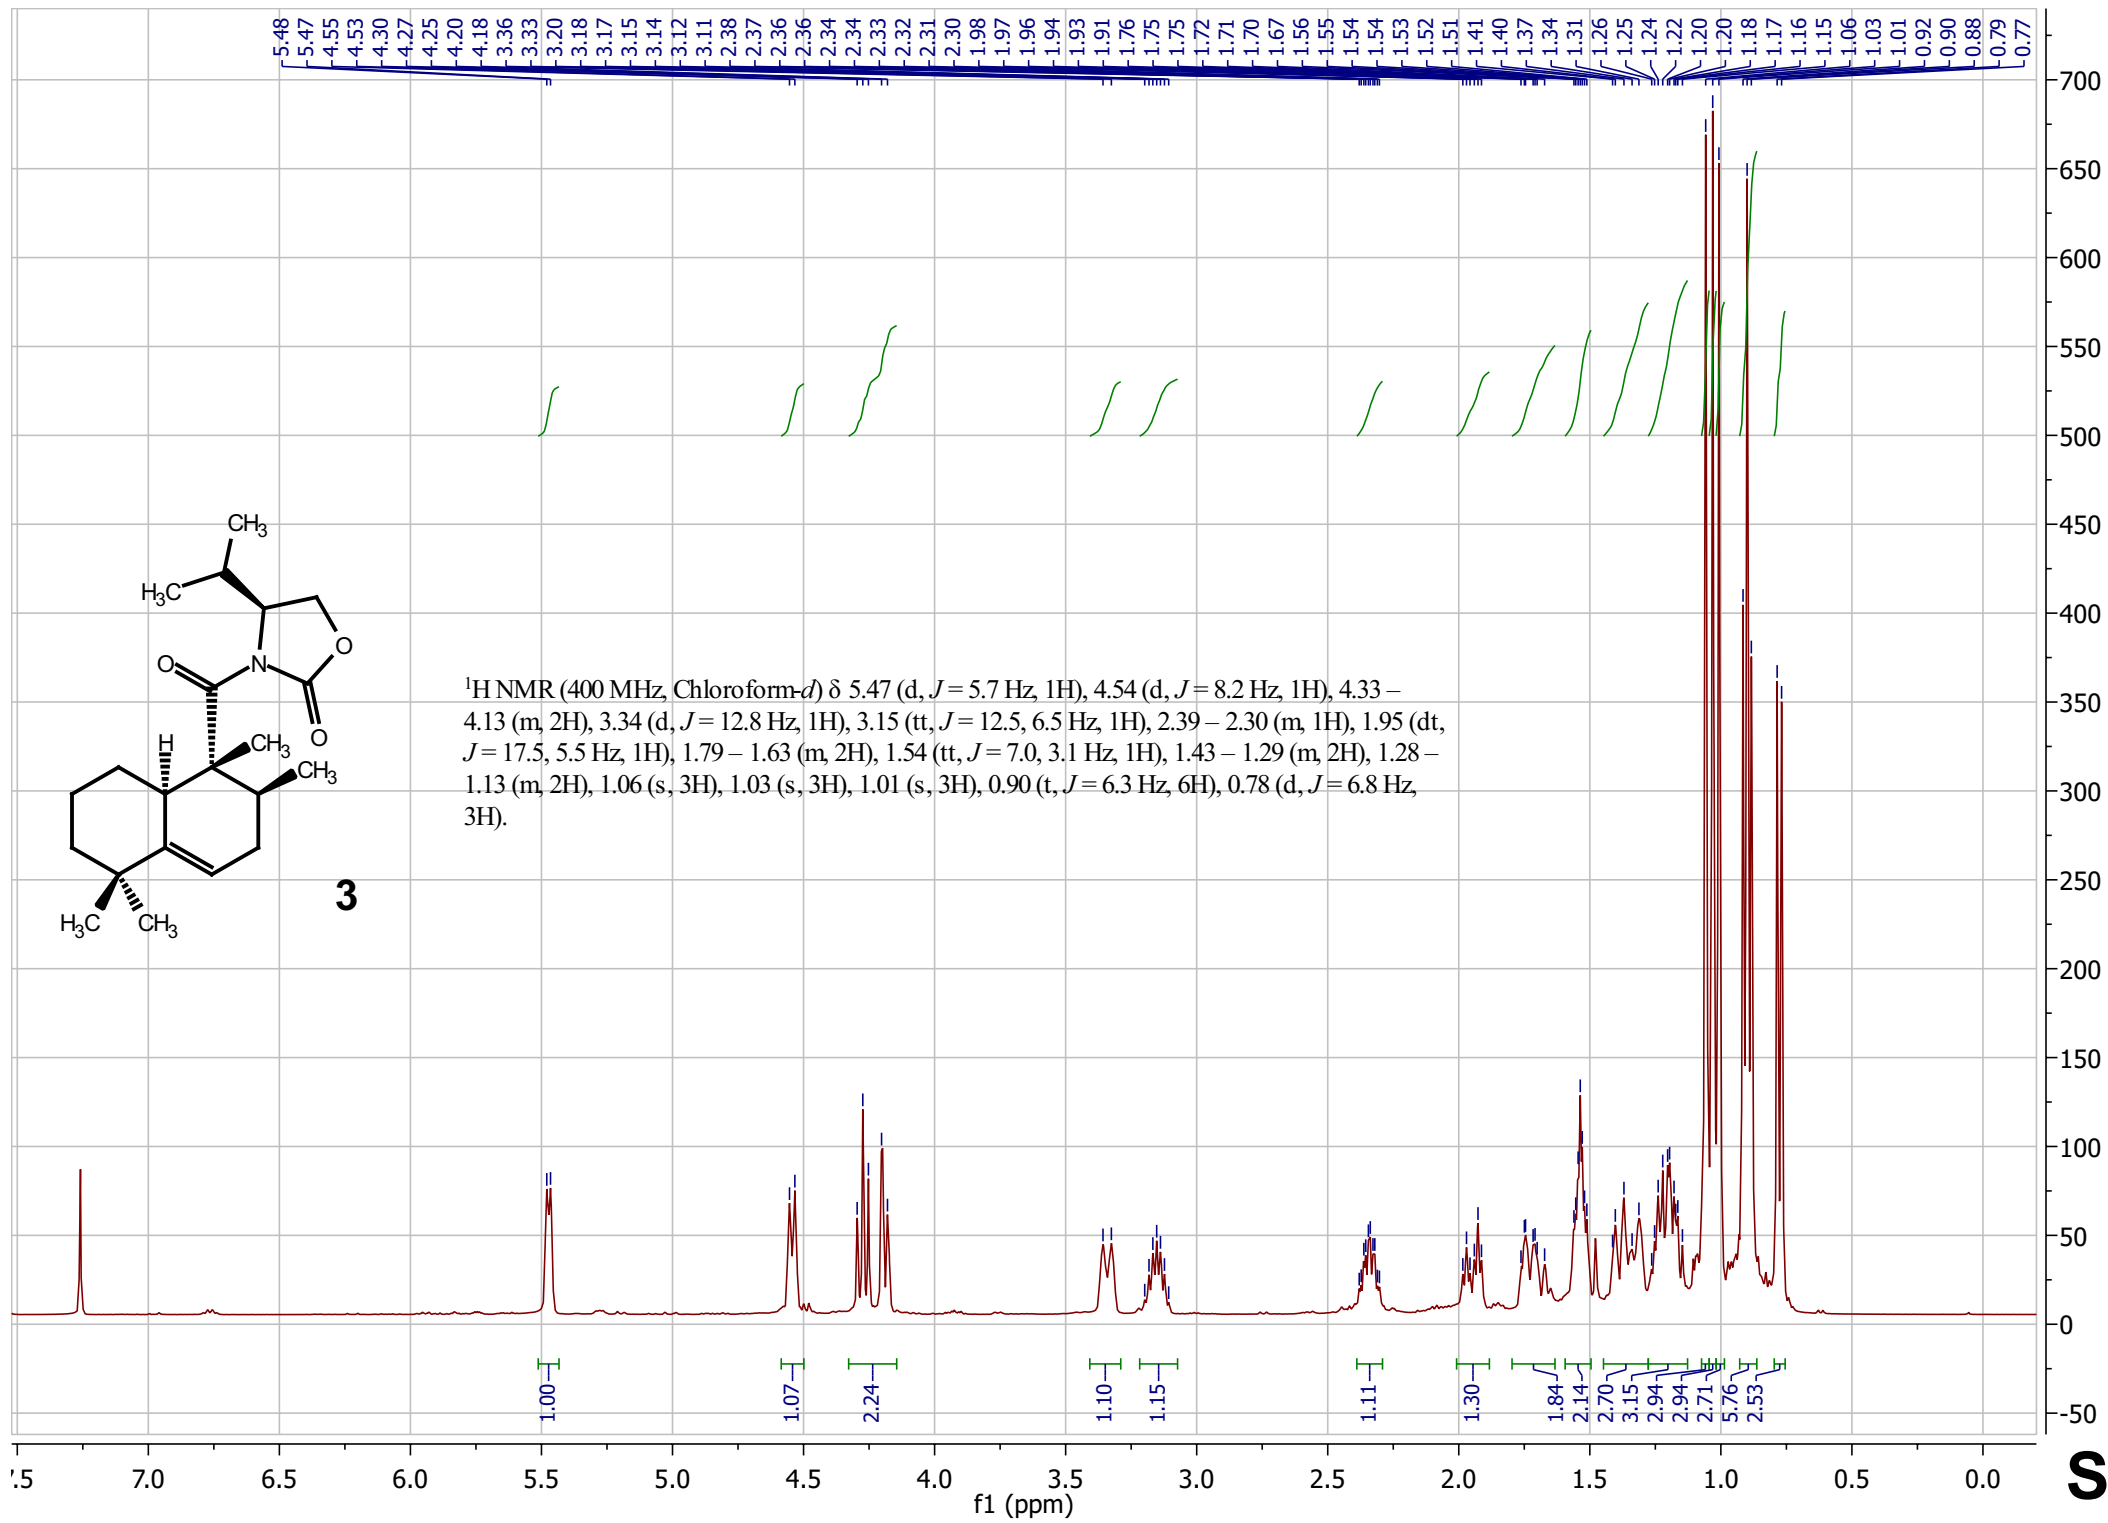

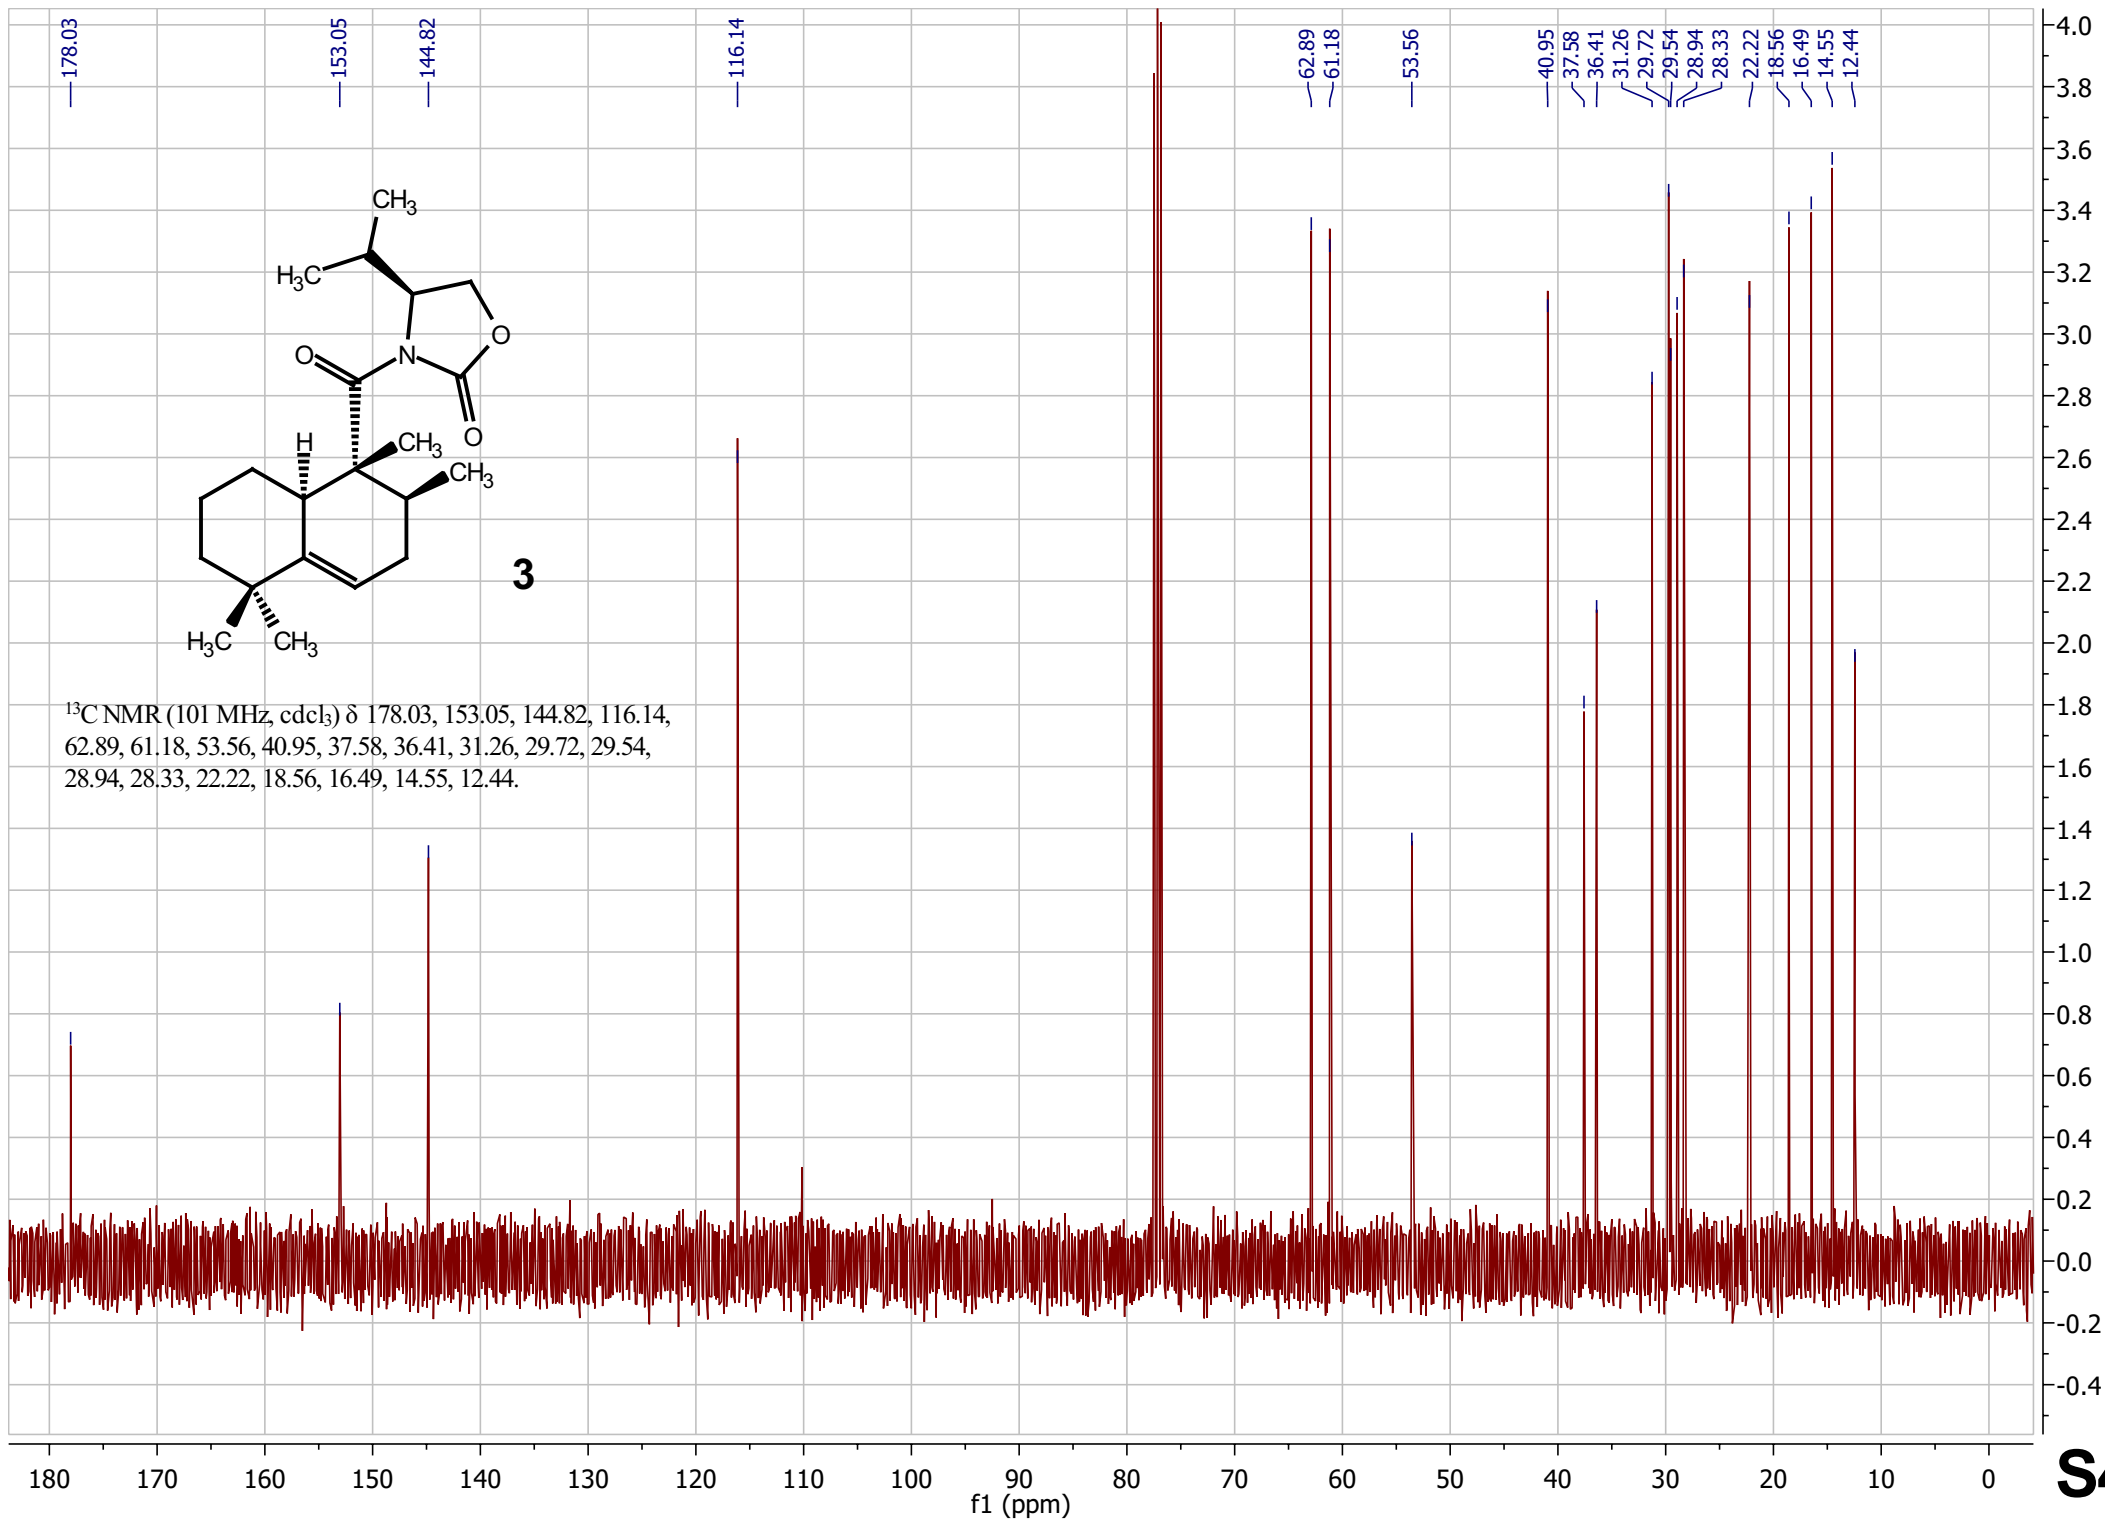

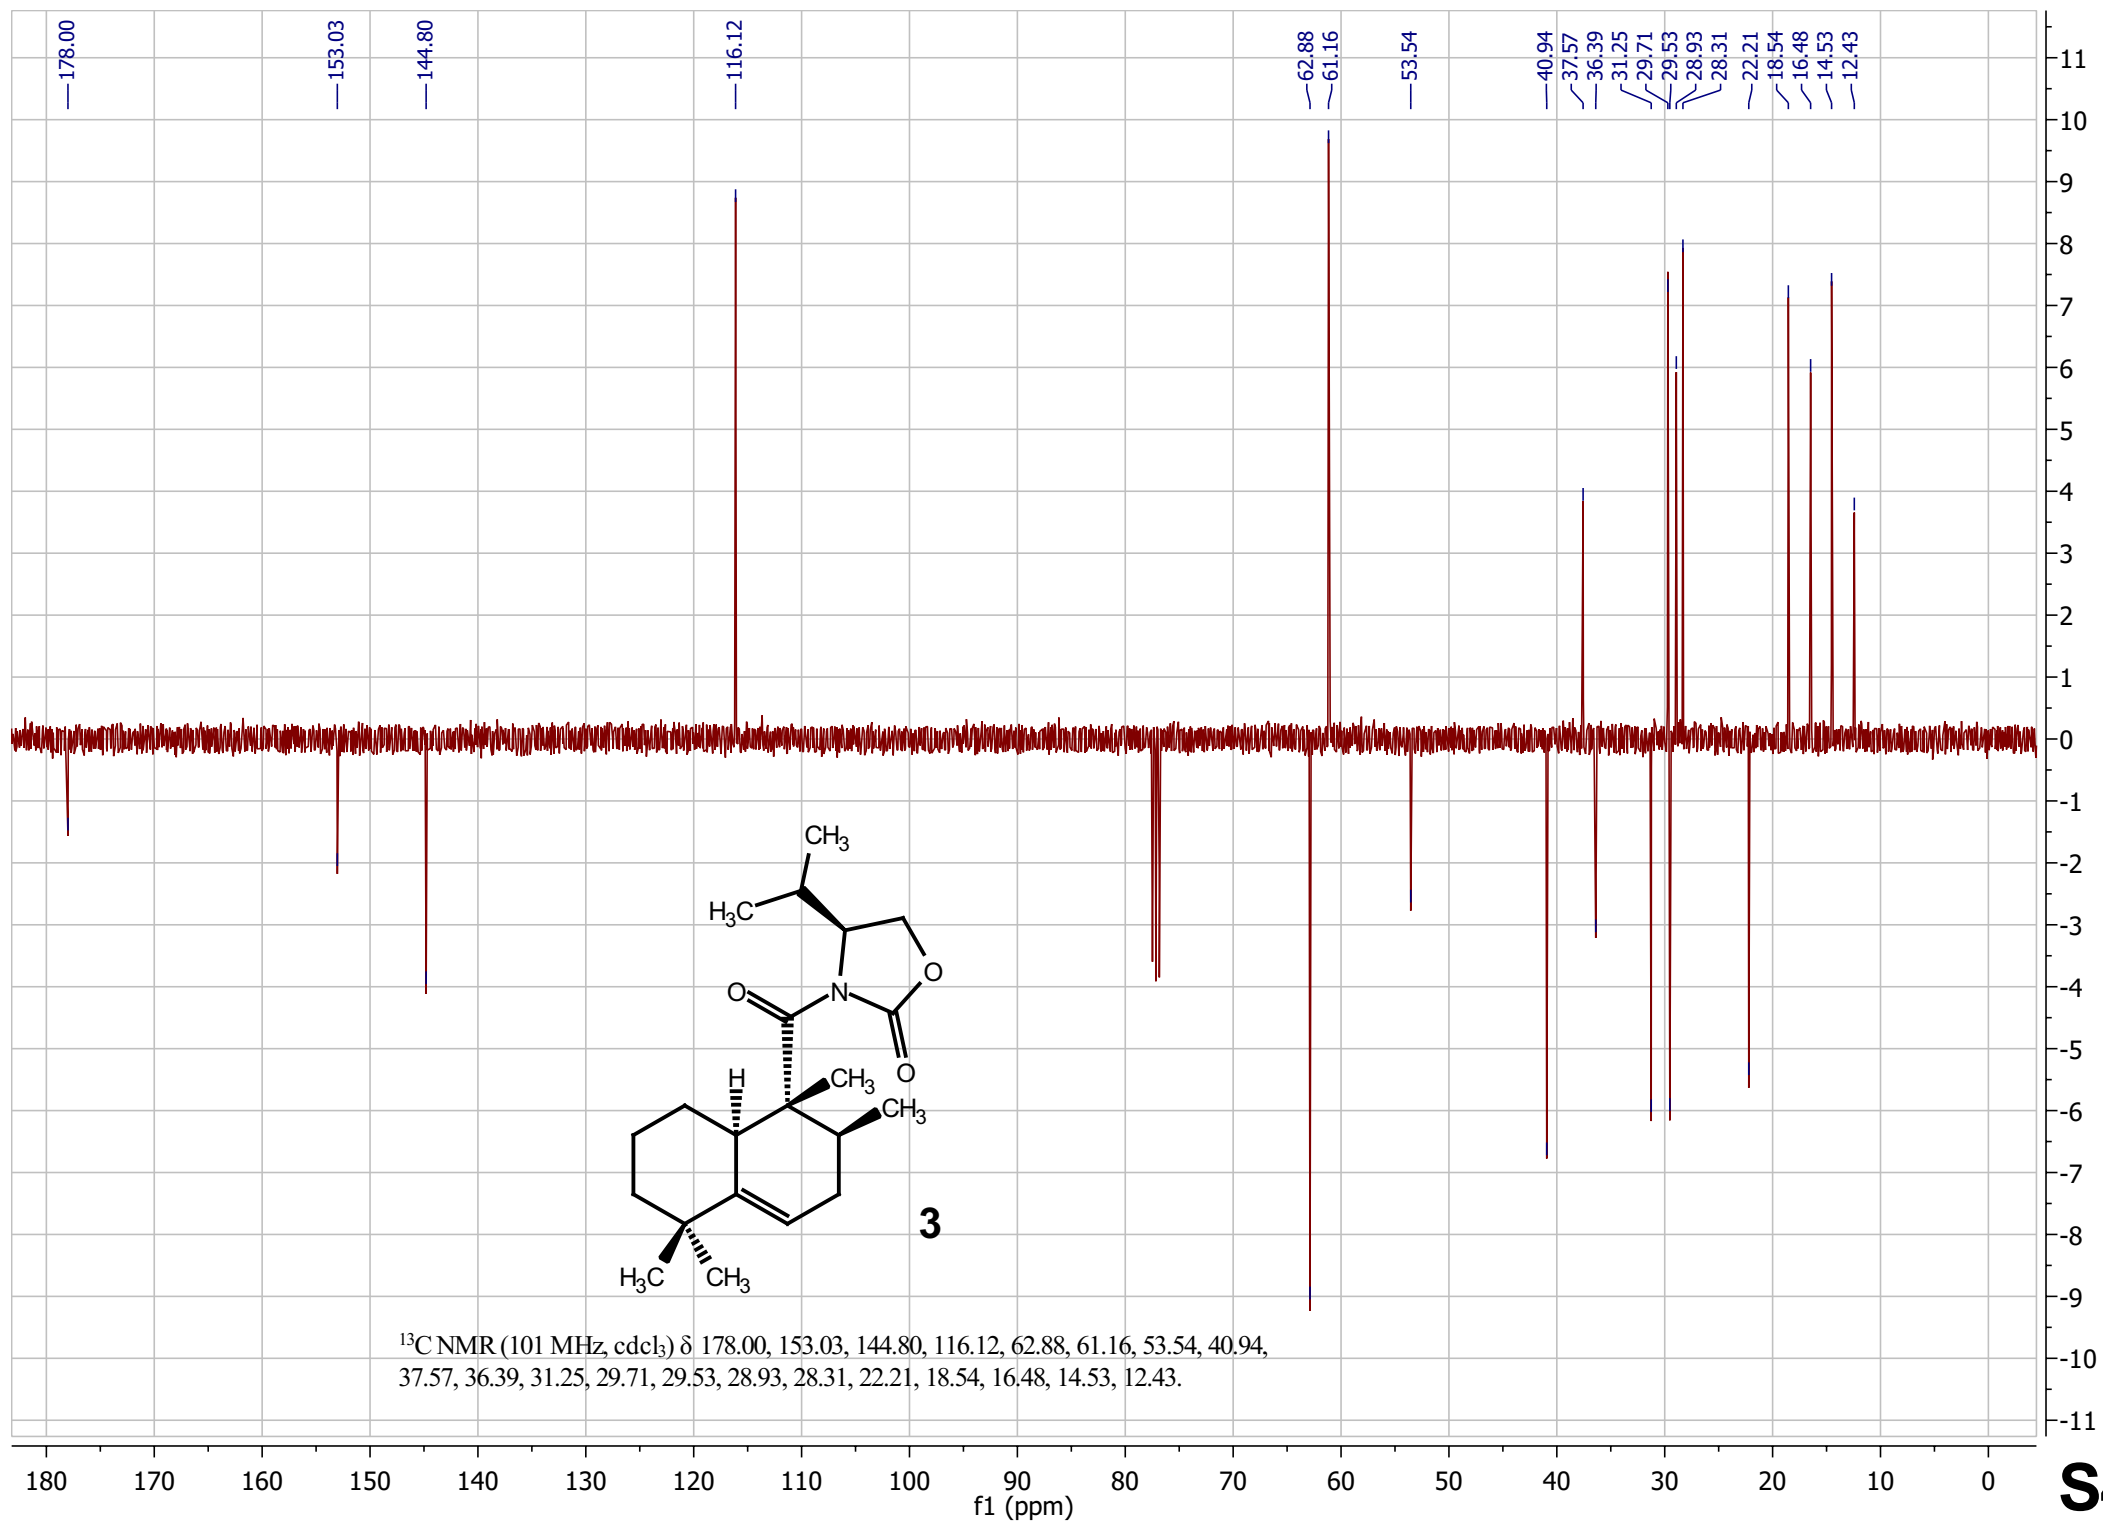

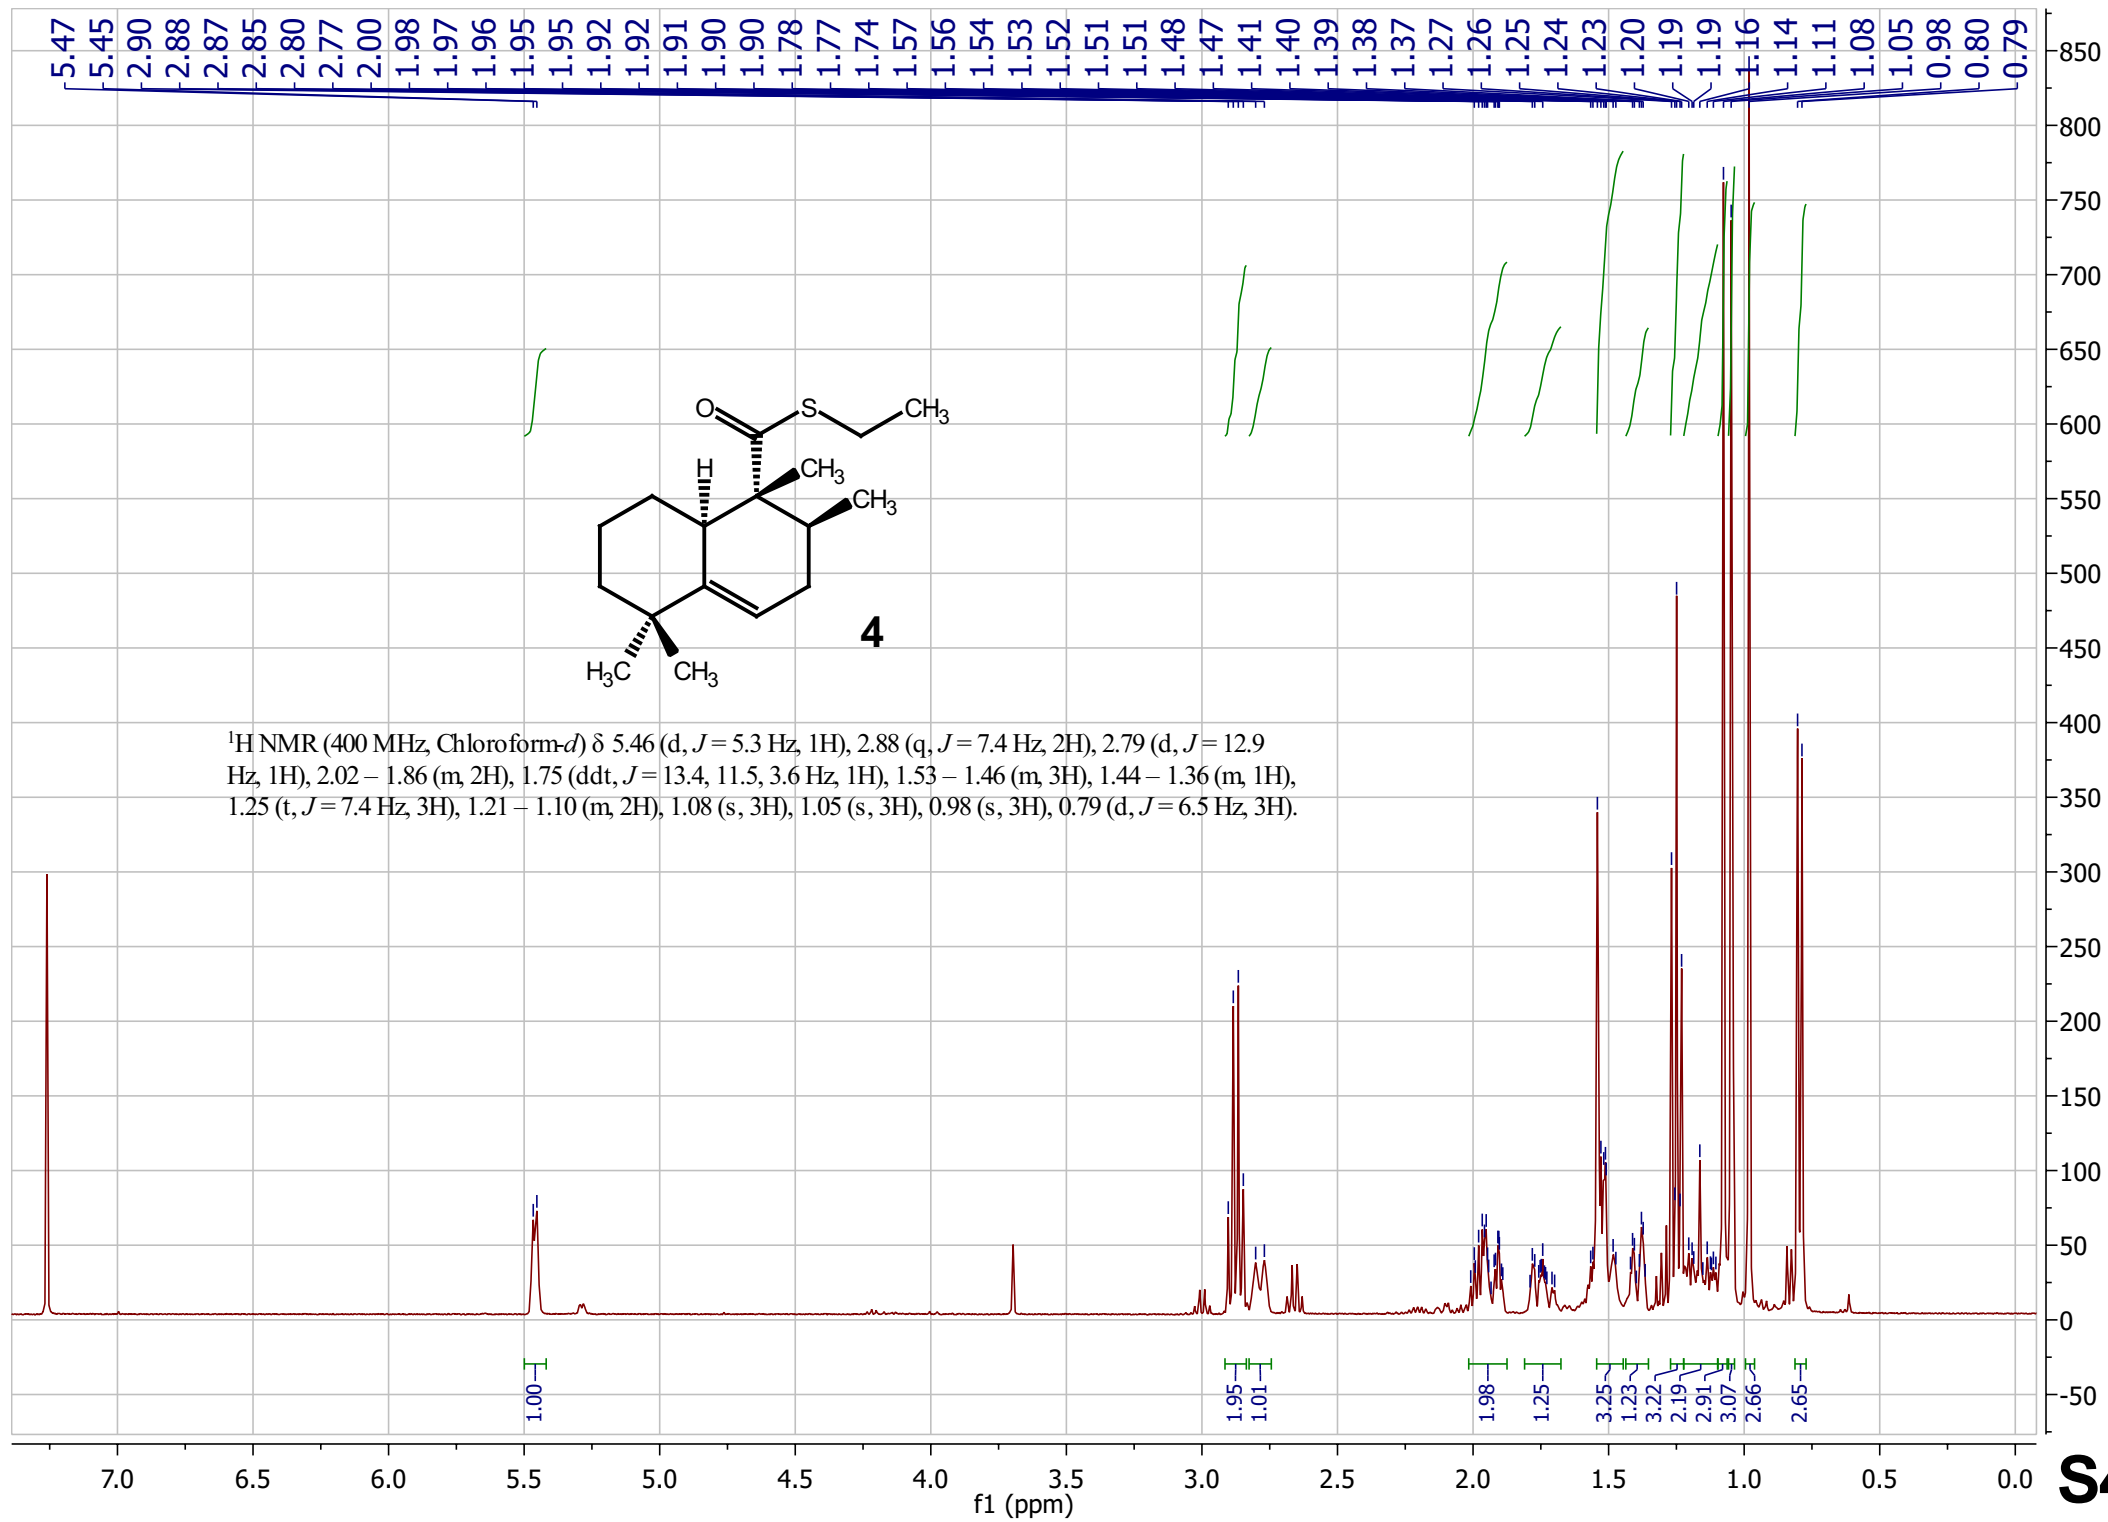



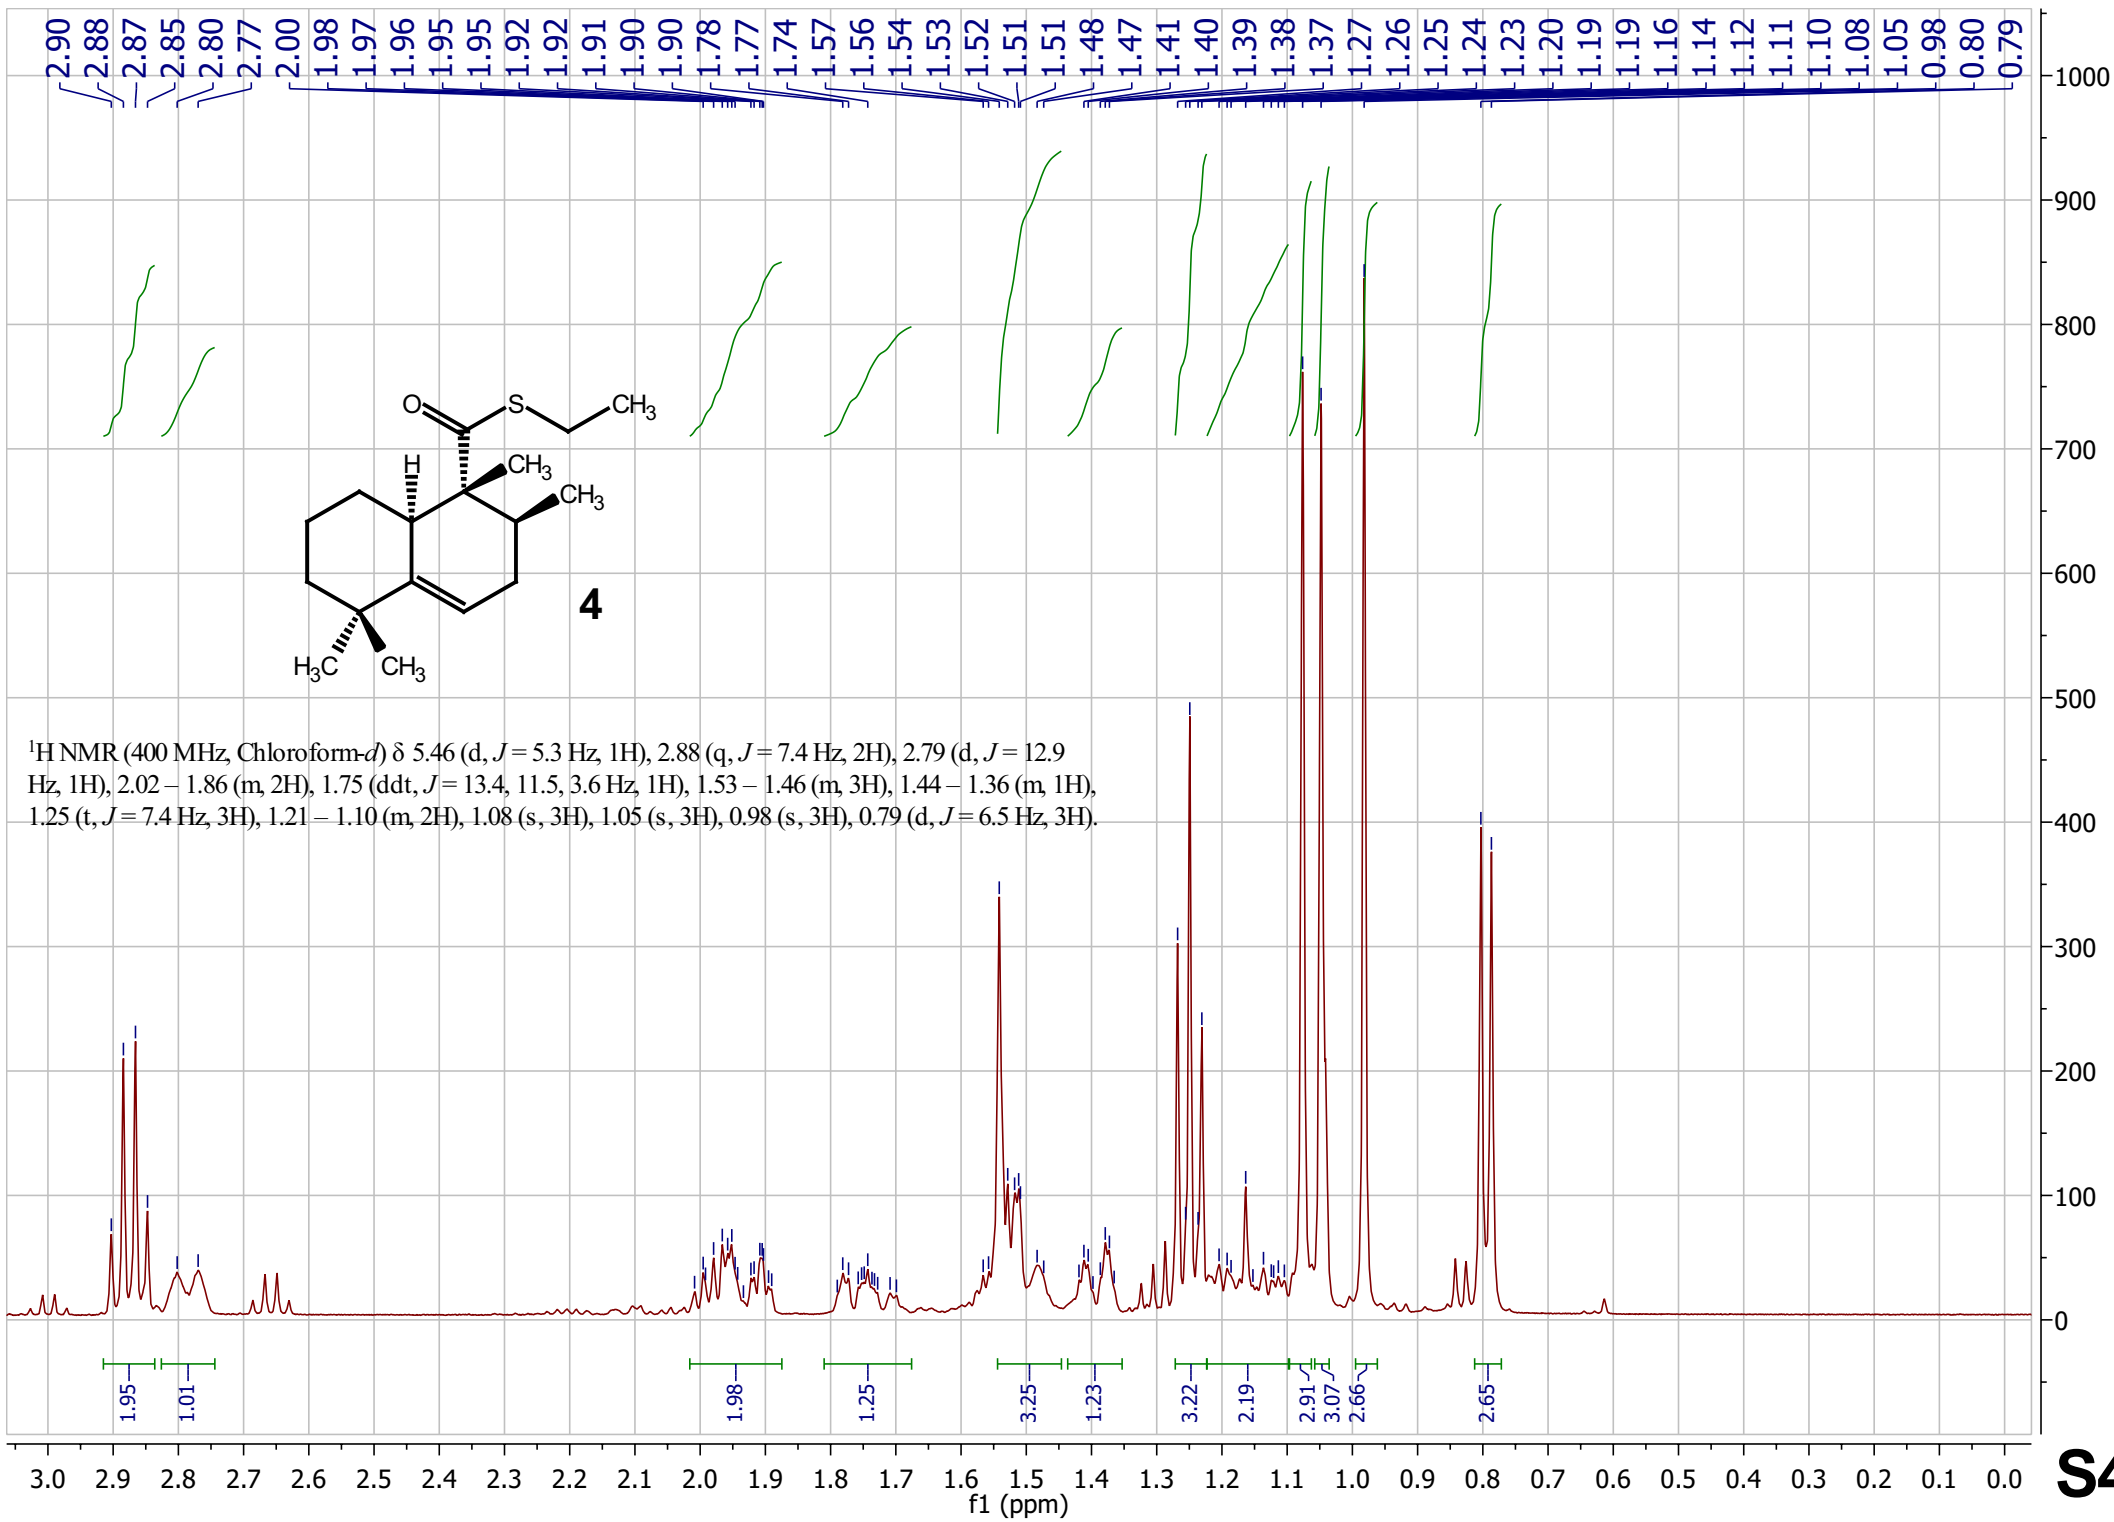

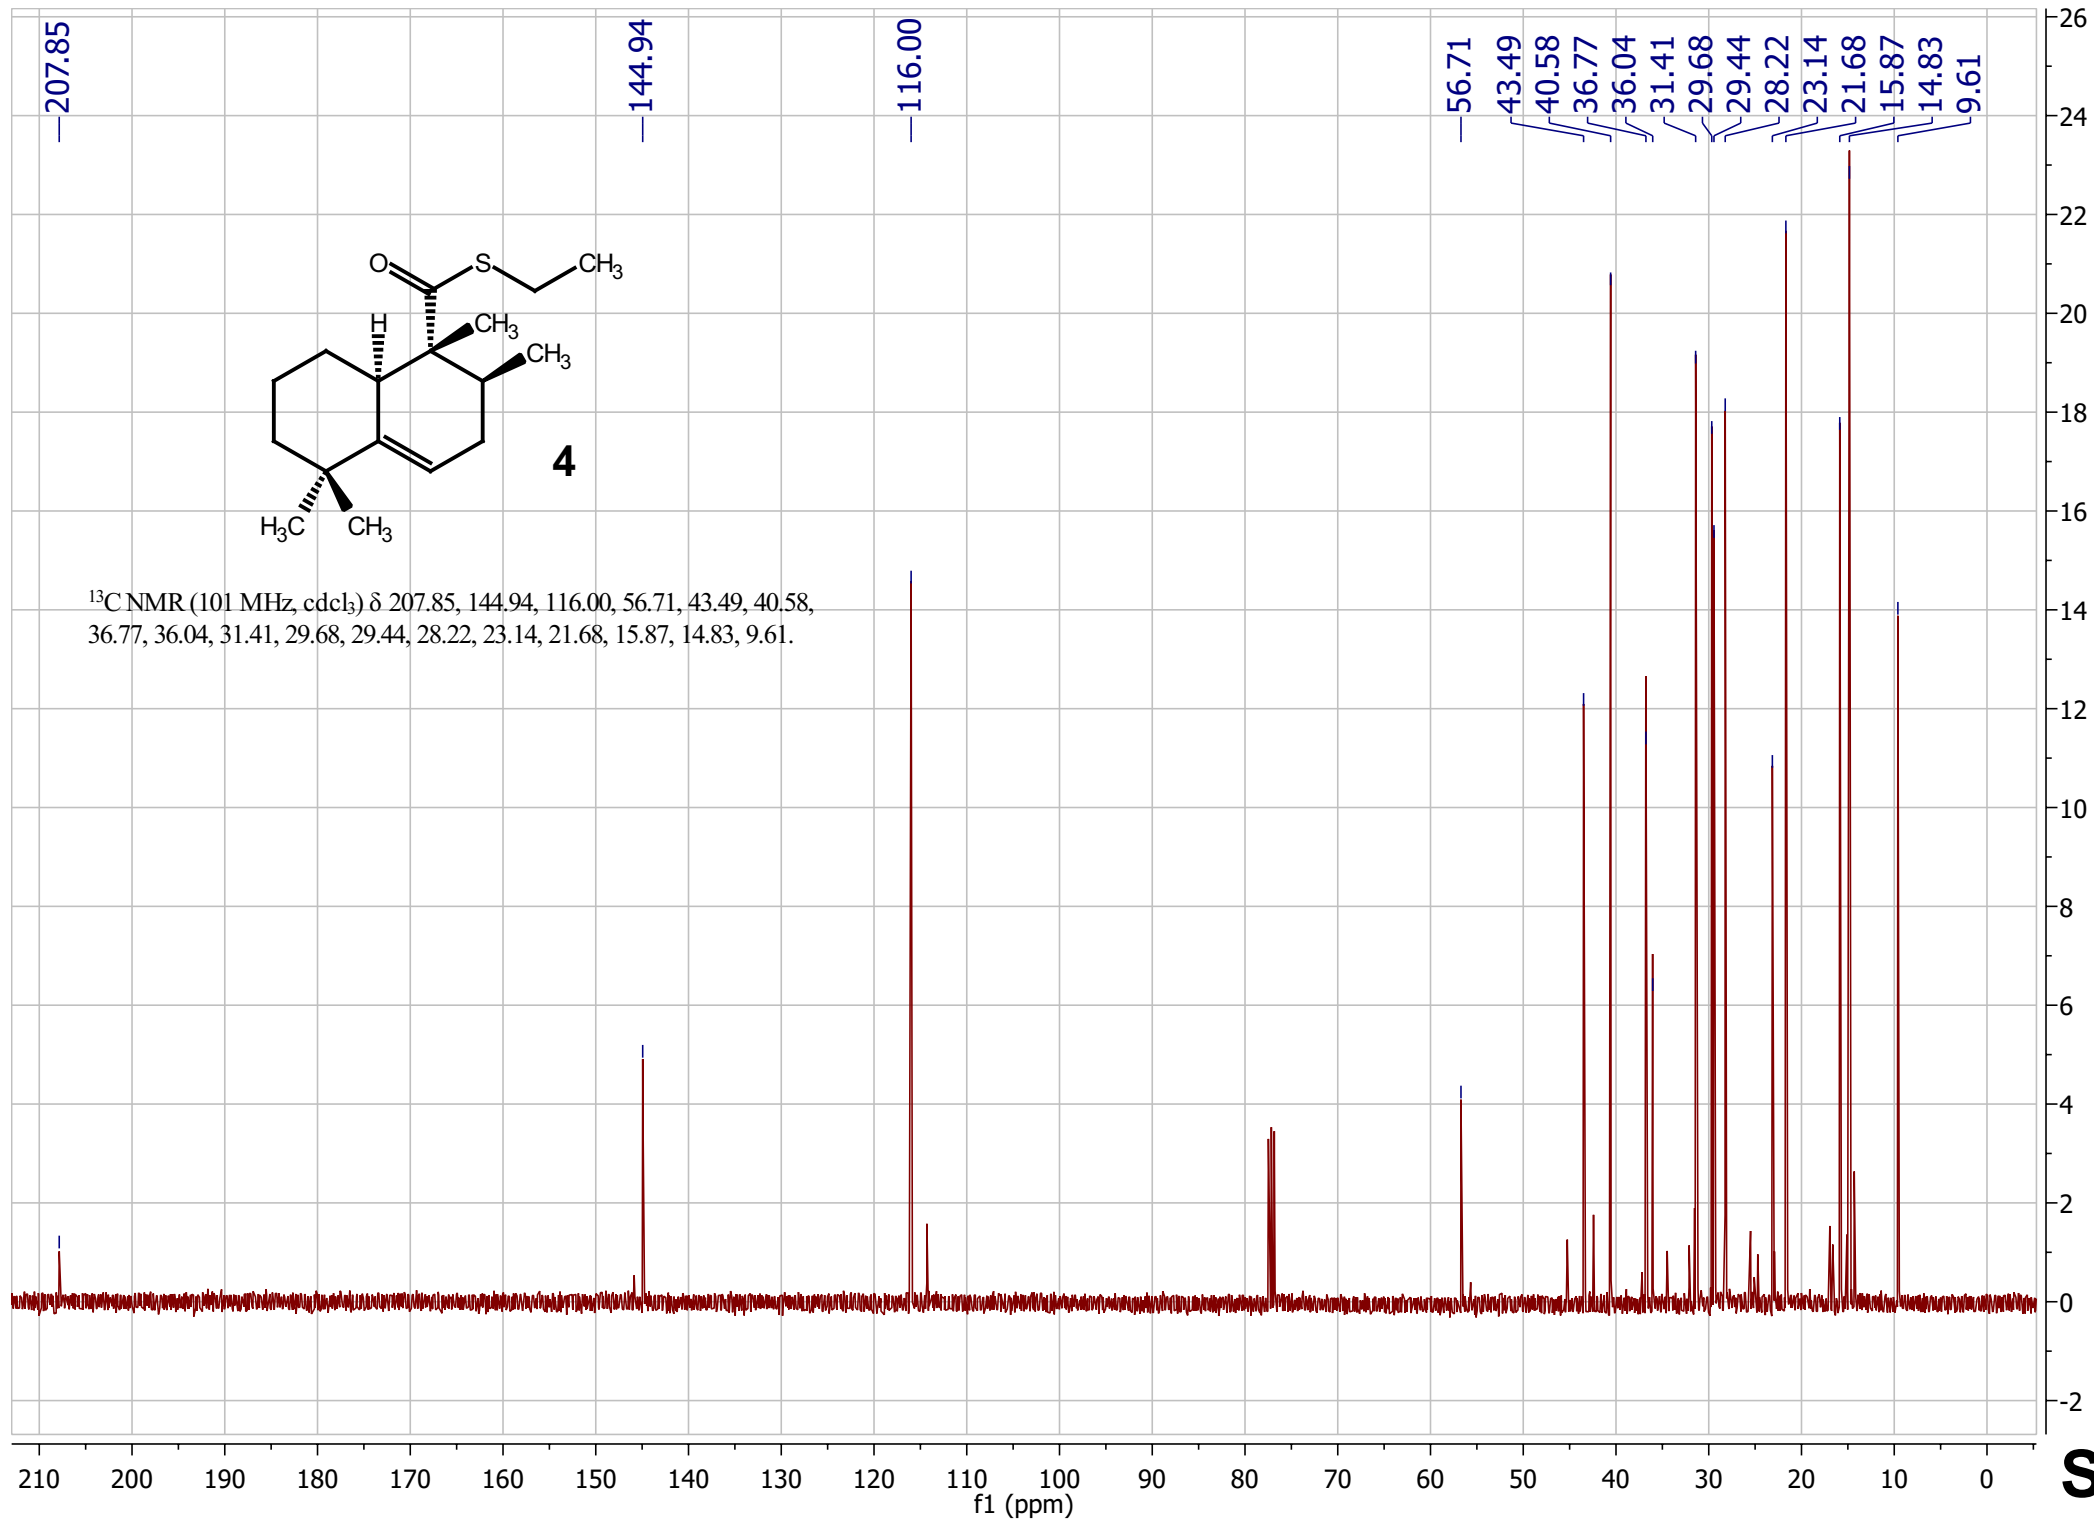

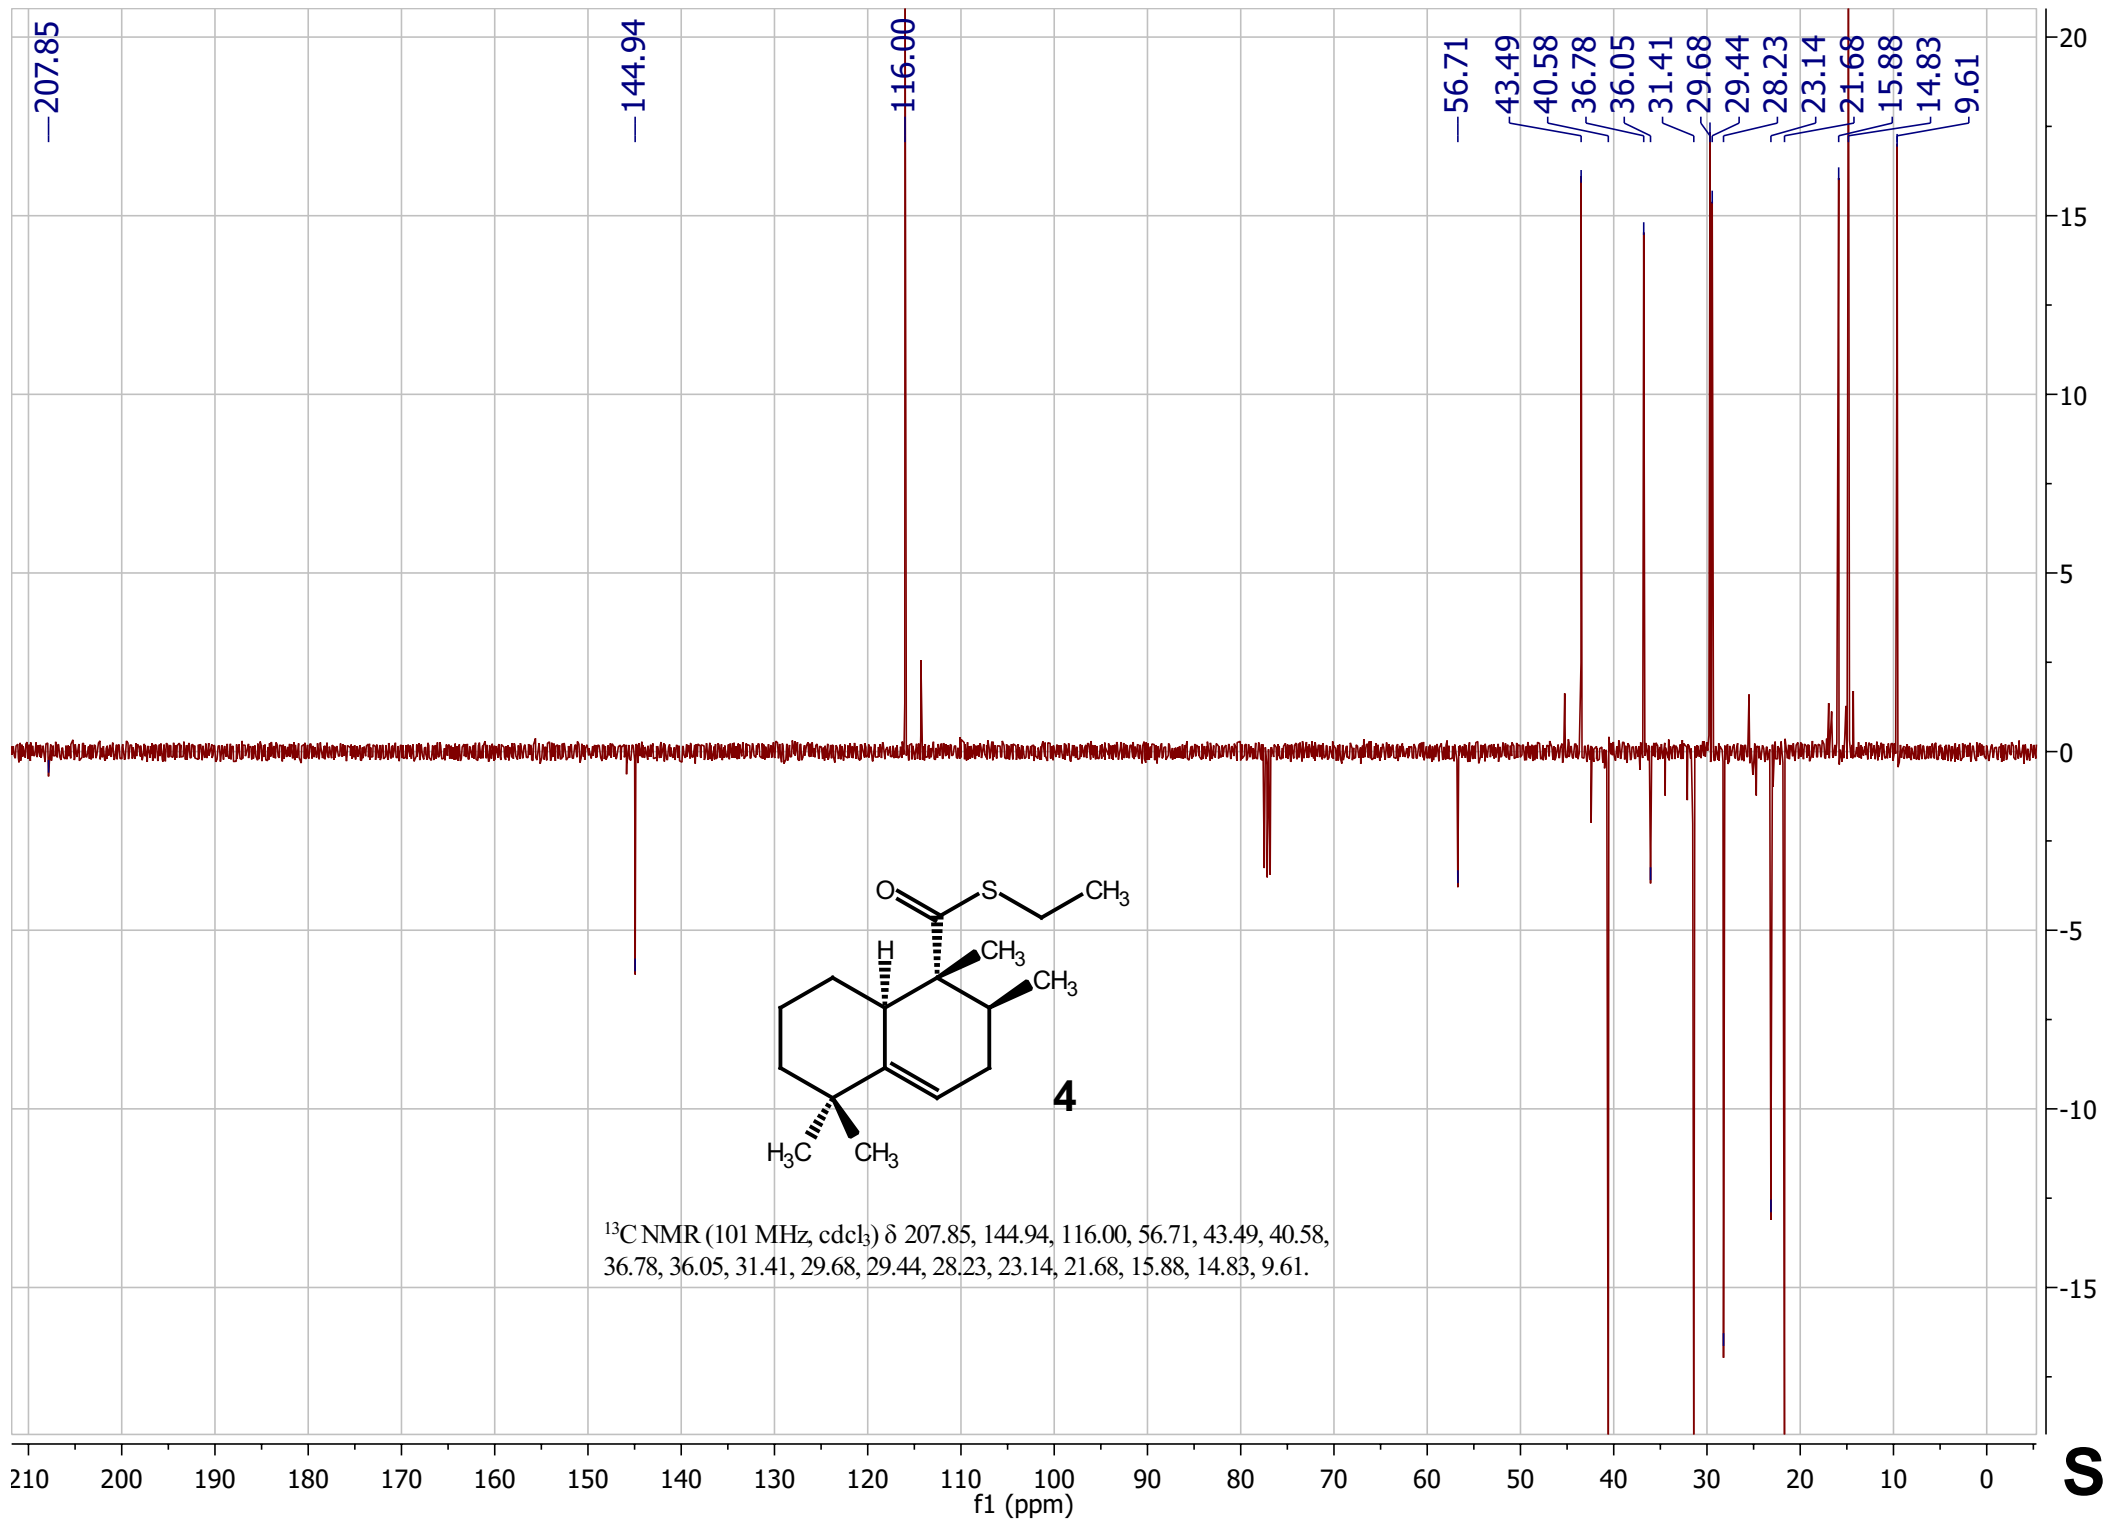

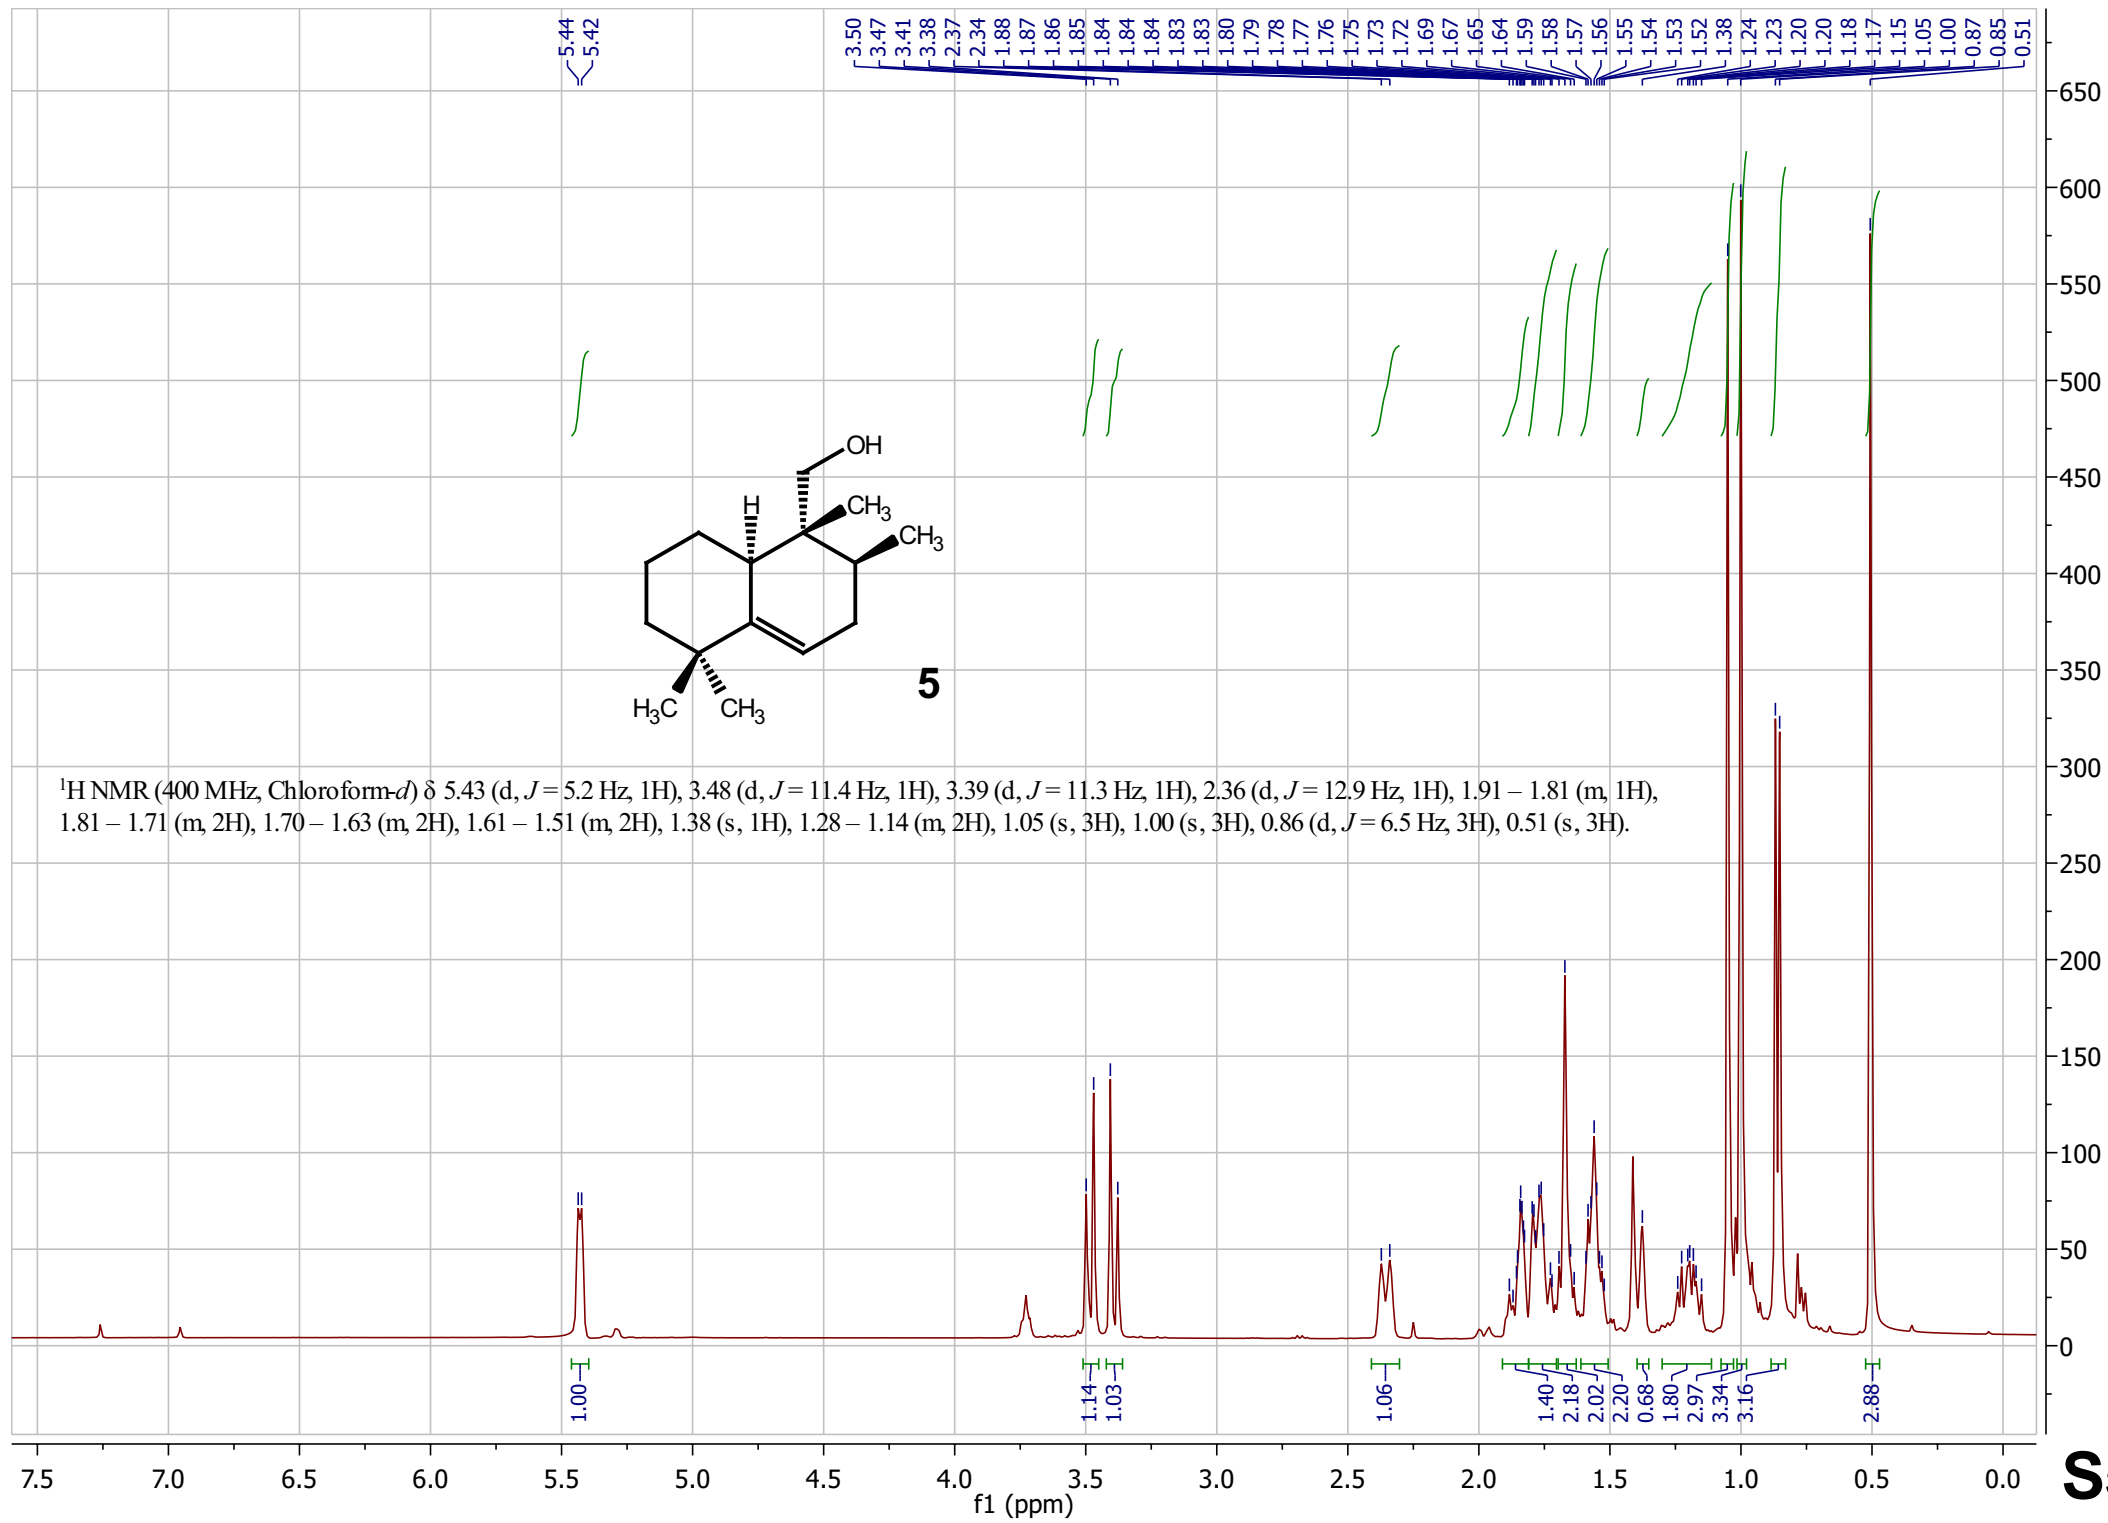

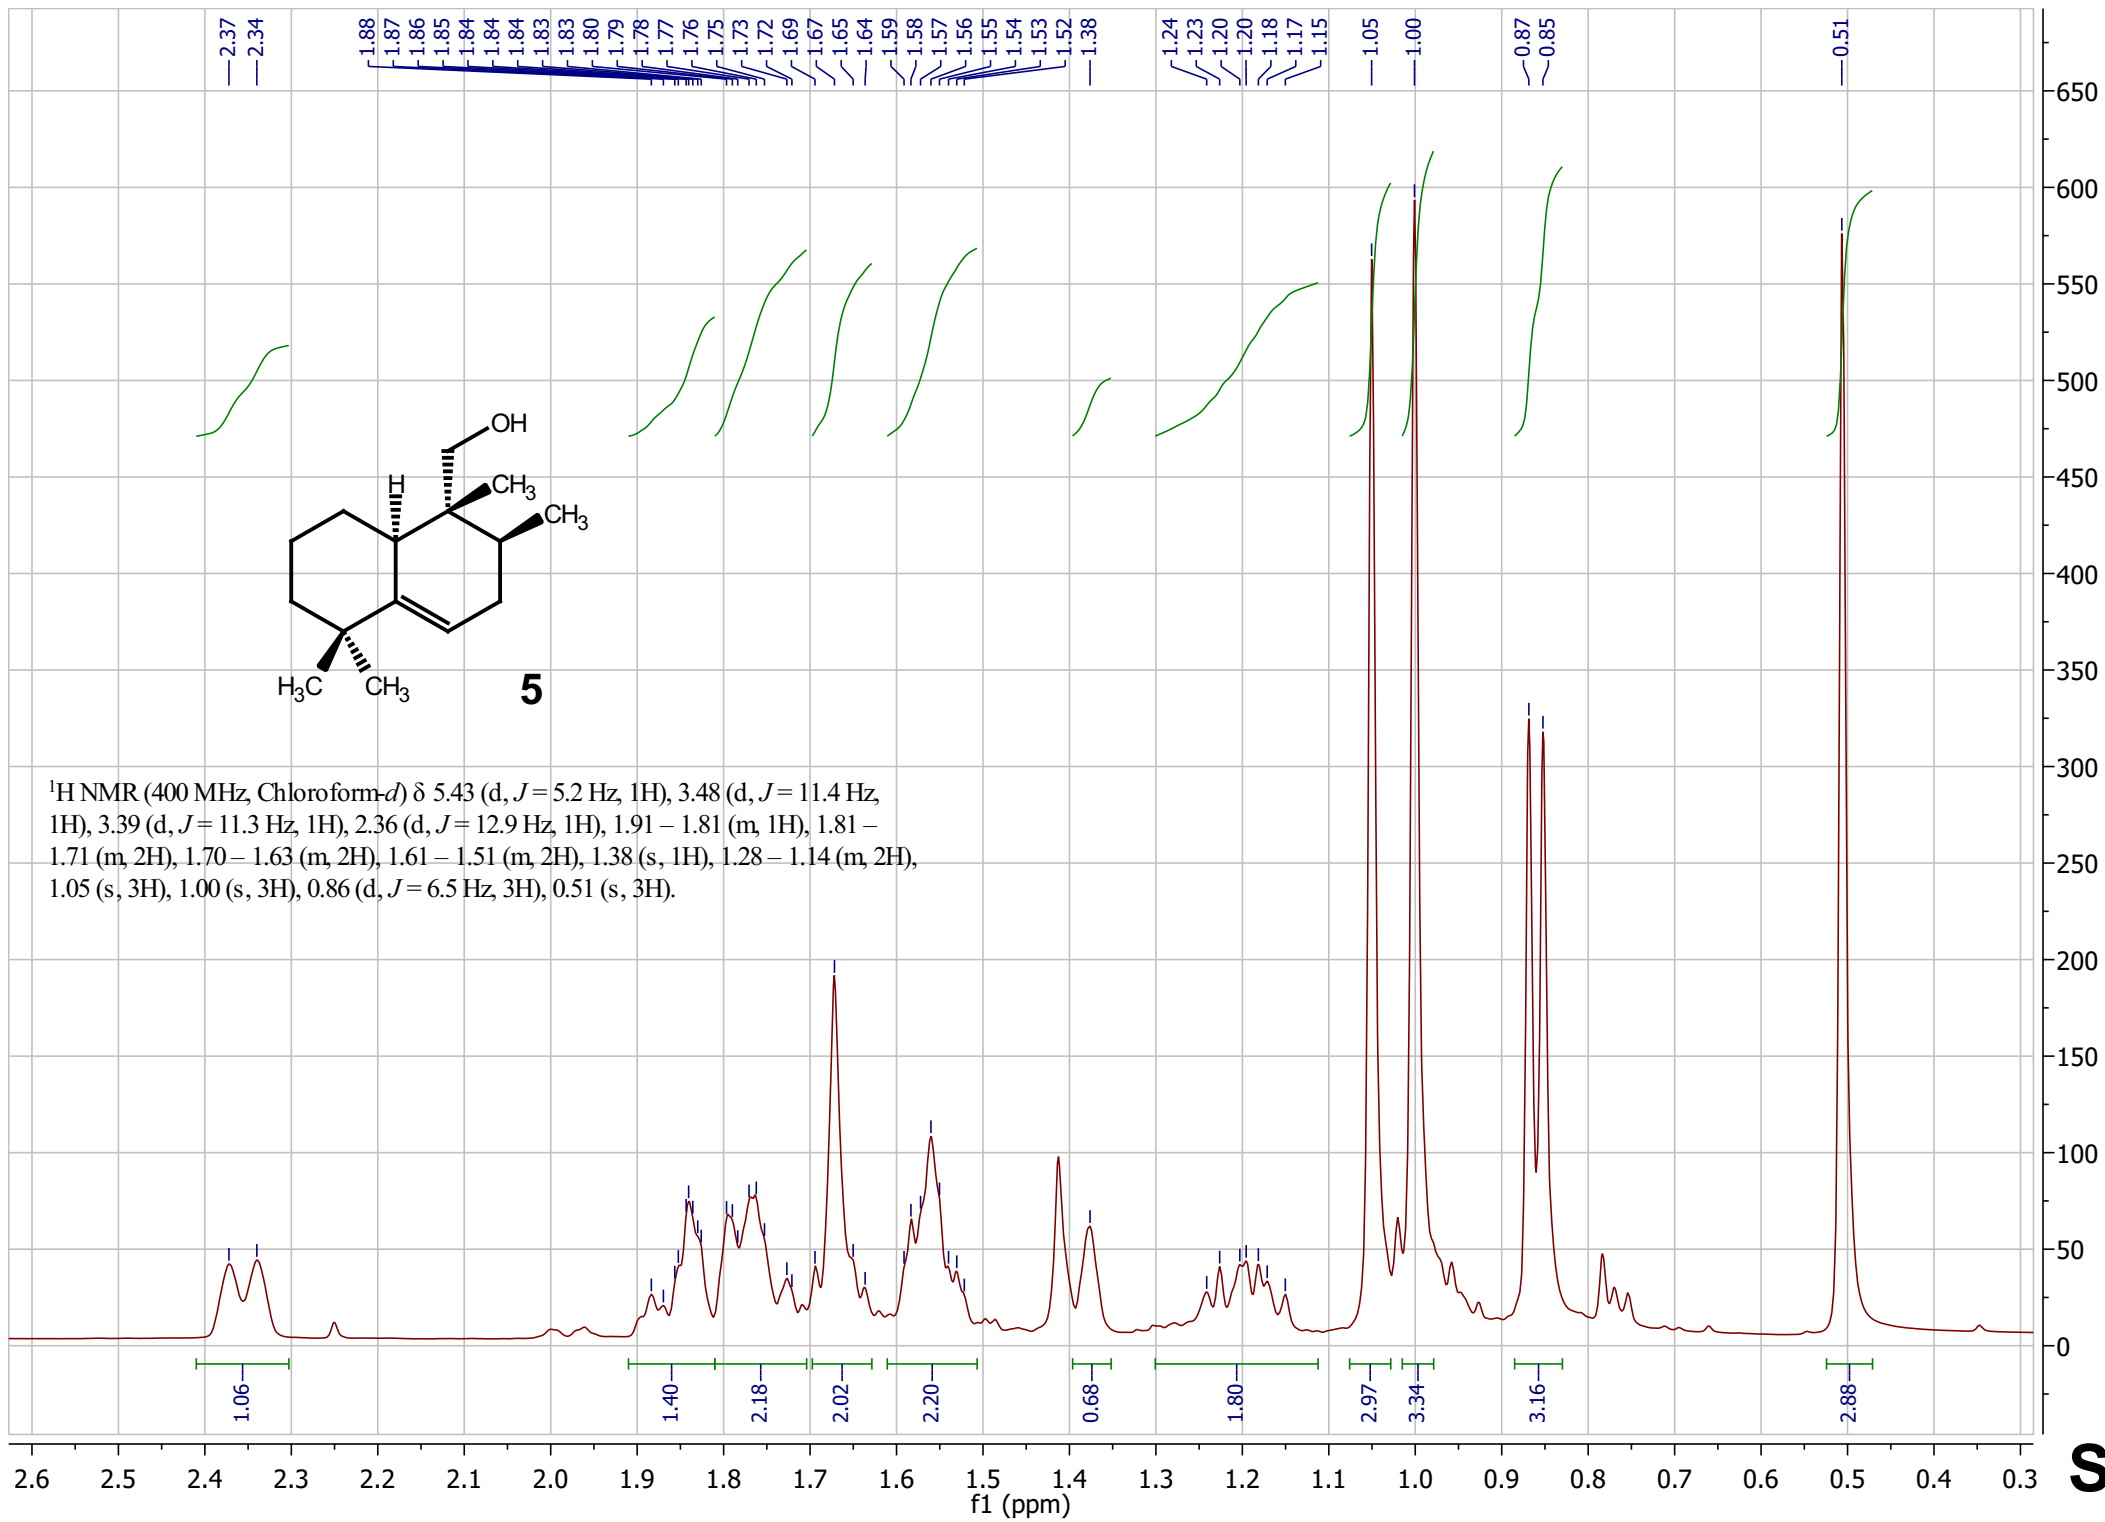

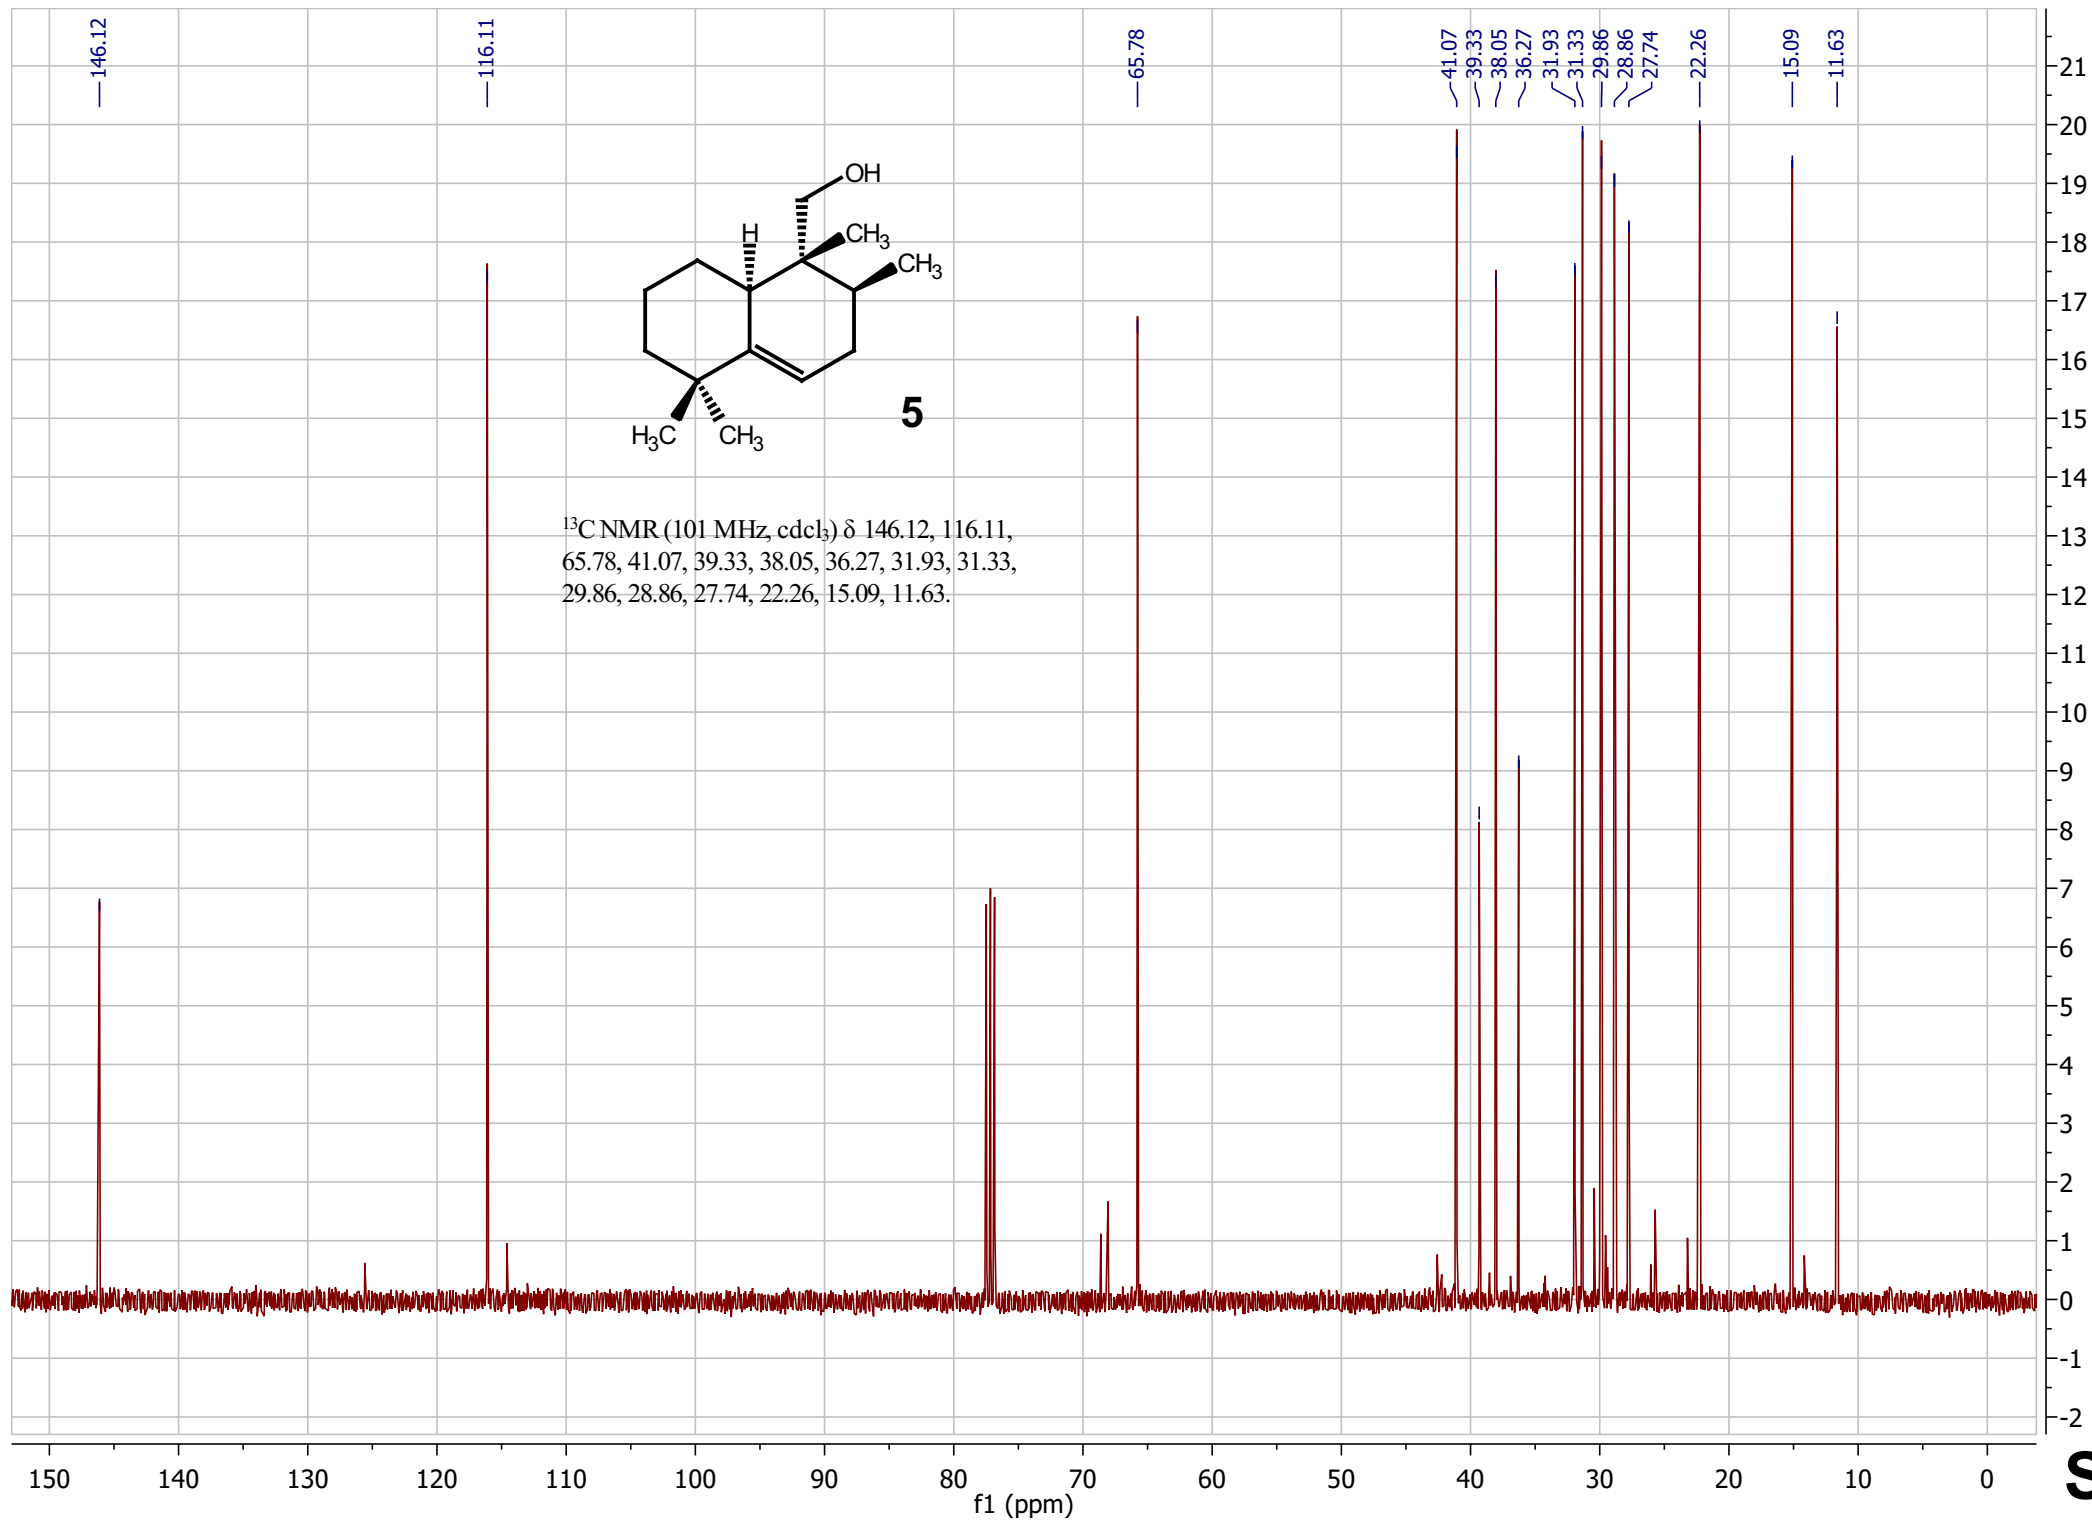

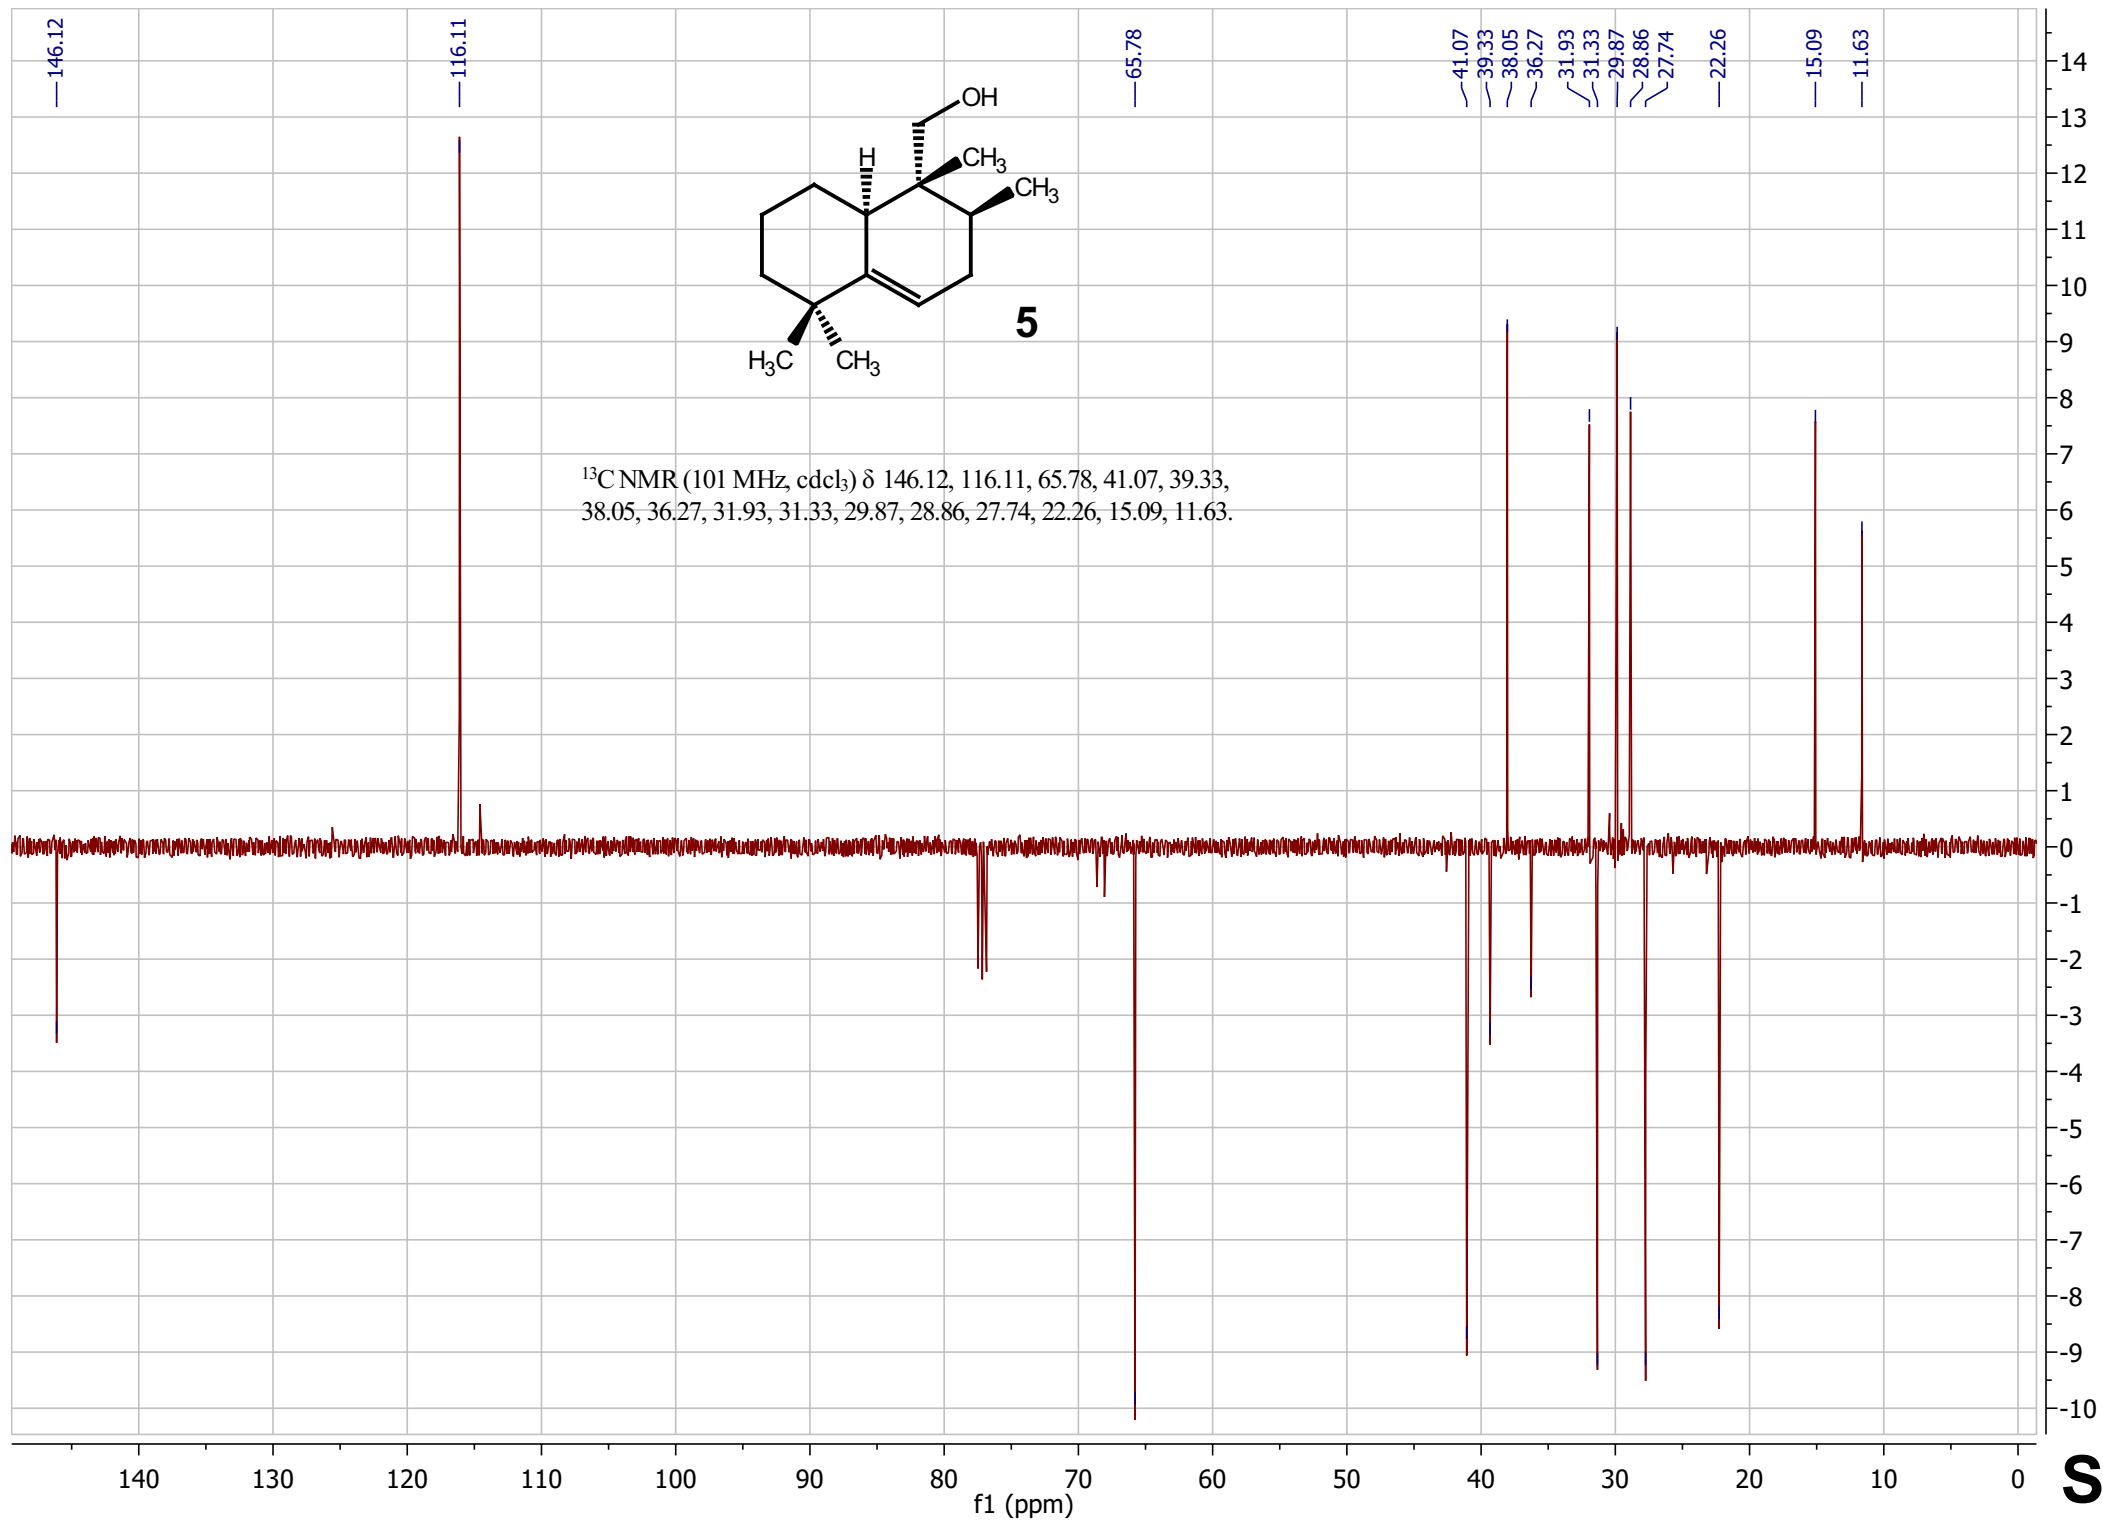

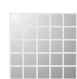SHIMADZU  
LabSolutions

## Analysis Report

## &lt;Sample Information&gt;

Sample Name : DA Sorenson Alcohol RAC AD-H  
 Sample ID :  
 Data Filename : DA Sorenson Alcohol RAC AD-H.lcd  
 Method Filename : C5 98-2 fl 0,5 60 min.lcm  
 Batch Filename : 20131112\_all column screening - 2014.lcb  
 Vial # : 1-1  
 Injection Volume : 4 uL  
 Date Acquired : 23-12-2014 23:25:08  
 Date Processed : 24-12-2014 16:44:44  
 Sample Type : Unknown  
 Acquired by : System Administrator  
 Processed by : System Administrator

## &lt;Chromatogram&gt;

mAU

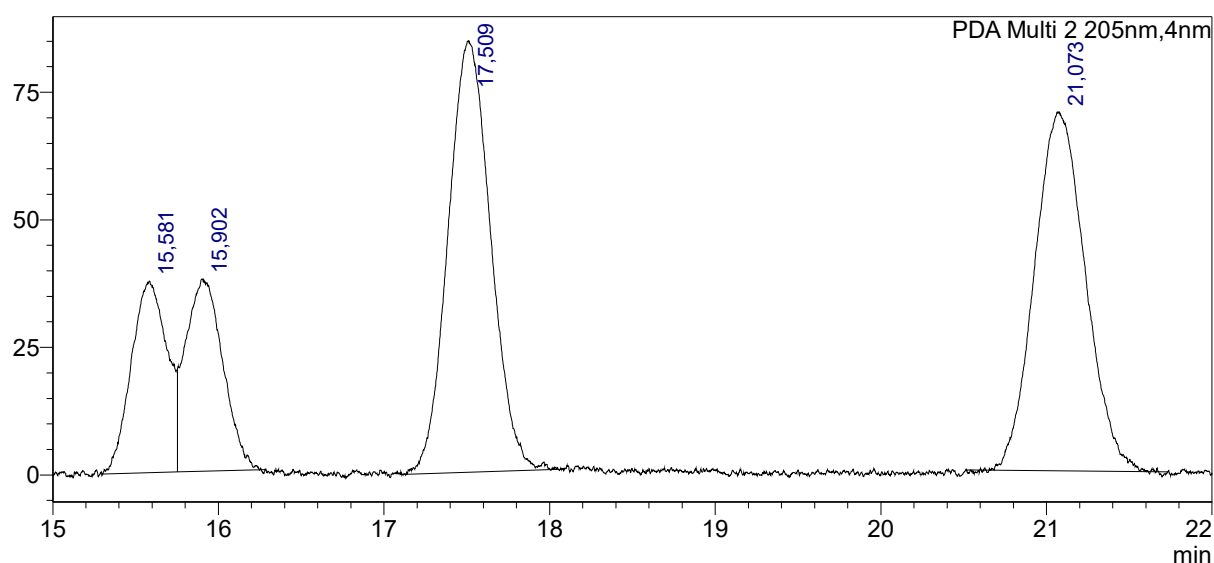

mAU

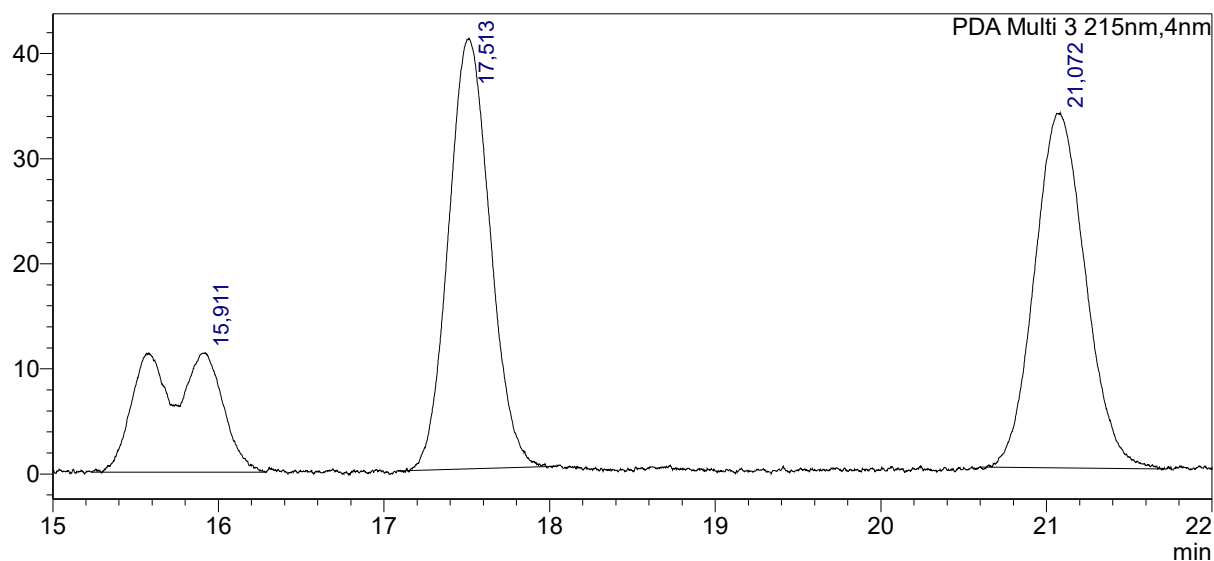

## &lt;Peak Table&gt;

PDA Ch2 205nm



| Peak# | Ret. Time | Area    | Height | Area%   |
|-------|-----------|---------|--------|---------|
| 1     | 15,581    | 568516  | 37414  | 13,625  |
| 2     | 15,902    | 589478  | 37634  | 14,128  |
| 3     | 17,509    | 1513709 | 84449  | 36,278  |
| 4     | 21,073    | 1500803 | 70285  | 35,969  |
| Total |           | 4172506 | 229782 | 100,000 |

## PDA Ch3 215nm

| Peak# | Ret. Time | Area    | Height | Area%   |
|-------|-----------|---------|--------|---------|
| 1     | 15,911    | 354004  | 11321  | 19,783  |
| 2     | 17,513    | 714835  | 40879  | 39,948  |
| 3     | 21,072    | 720568  | 33684  | 40,269  |
| Total |           | 1789407 | 85884  | 100,000 |

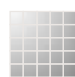SHIMADZU  
LabSolutions

## Analysis Report

## &lt;Sample Information&gt;

|                  |                                                 |              |                        |
|------------------|-------------------------------------------------|--------------|------------------------|
| Sample Name      | : Diels-Alder adduct Alcohol 4 ENT first DA     | Sample Type  | : Unknown              |
| Sample ID        | :                                               | Level        | : 3                    |
| Data Filename    | : Diels-Alder adduct Alcohol 4 ENT first DA.lcd | Acquired by  | : System Administrator |
| Method Filename  | : C5 98-2 fl 0,5 40 min.lcm                     | Processed by | : System Administrator |
| Batch Filename   | : MHR-047.lcb                                   |              |                        |
| Vial #           | : 1-88                                          |              |                        |
| Injection Volume | : 1 uL                                          |              |                        |
| Date Acquired    | : 10-10-2015 17:35:06                           |              |                        |
| Date Processed   | : 10-10-2015 18:15:08                           |              |                        |

## &lt;Chromatogram&gt;

mAU

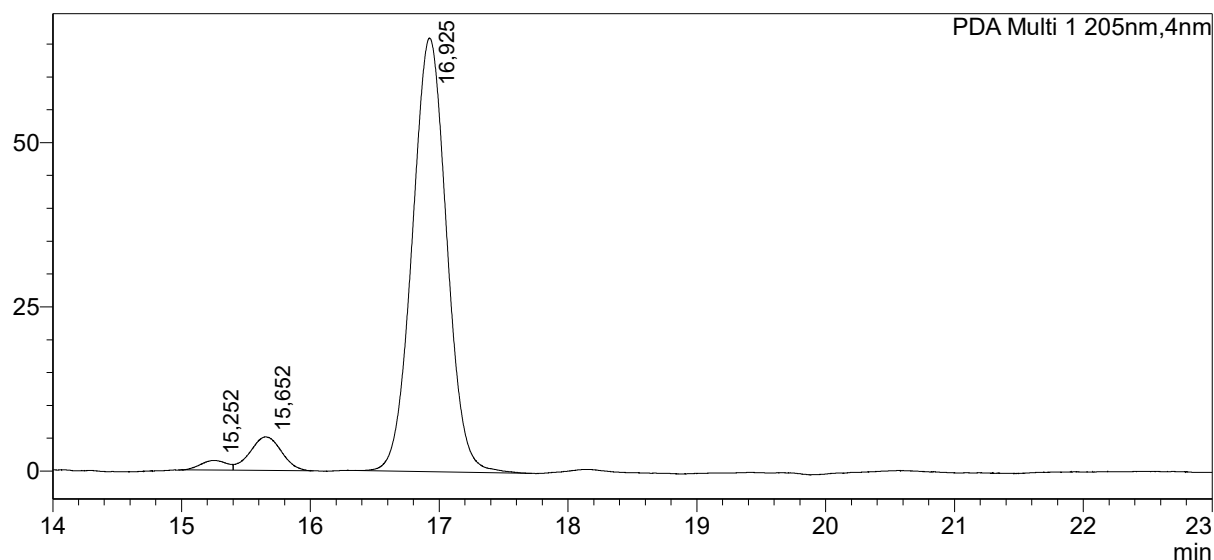

mAU

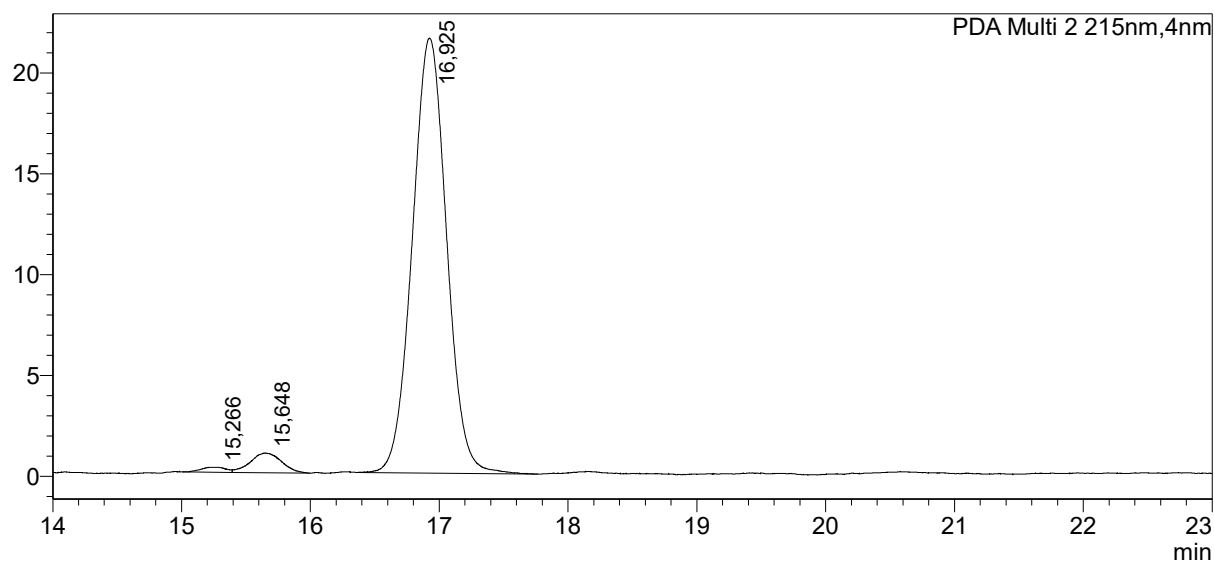

## &lt;Peak Table&gt;

PDA Ch1 205nm

| Peak# | Ret. Time | Area    | Height | Area%   |
|-------|-----------|---------|--------|---------|
| 1     | 15,252    | 21156   | 1475   | 1,589   |
| 2     | 15,652    | 86592   | 5108   | 6,502   |
| 3     | 16,925    | 1224077 | 65981  | 91,910  |
| Total |           | 1331825 | 72564  | 100,000 |

## PDA Ch2 215nm

| Peak# | Ret. Time | Area   | Height | Area%   |
|-------|-----------|--------|--------|---------|
| 1     | 15,266    | 3376   | 248    | 0,807   |
| 2     | 15,648    | 16509  | 976    | 3,945   |
| 3     | 16,925    | 398634 | 21561  | 95,249  |
| Total |           | 418519 | 22785  | 100,000 |

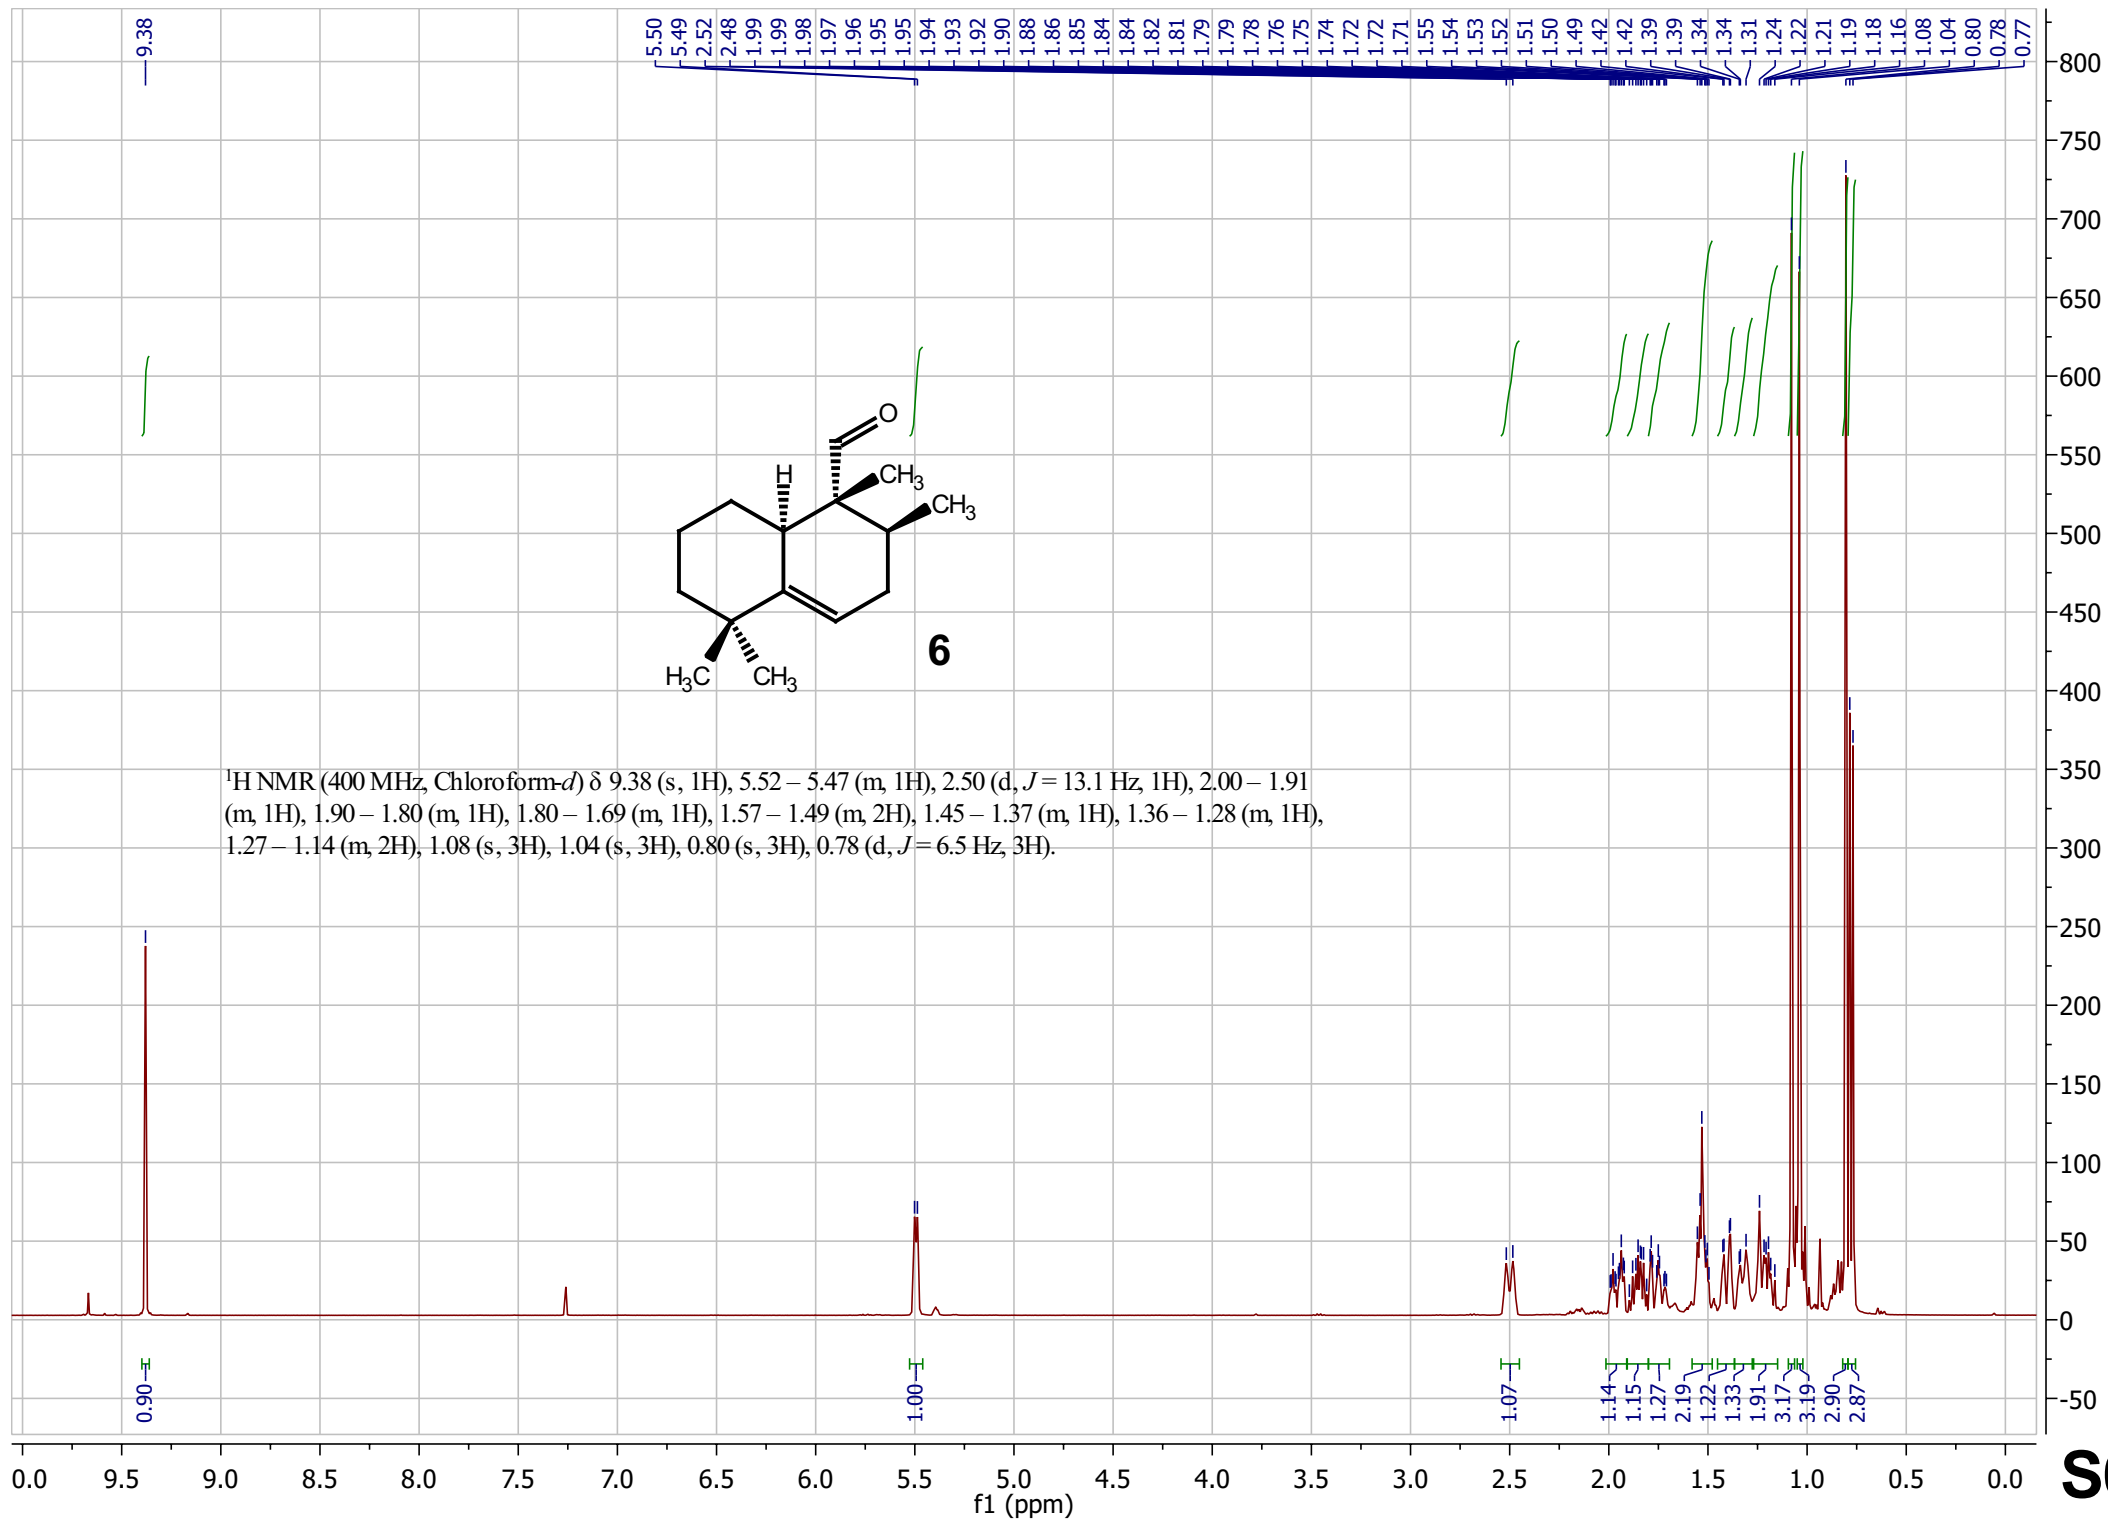

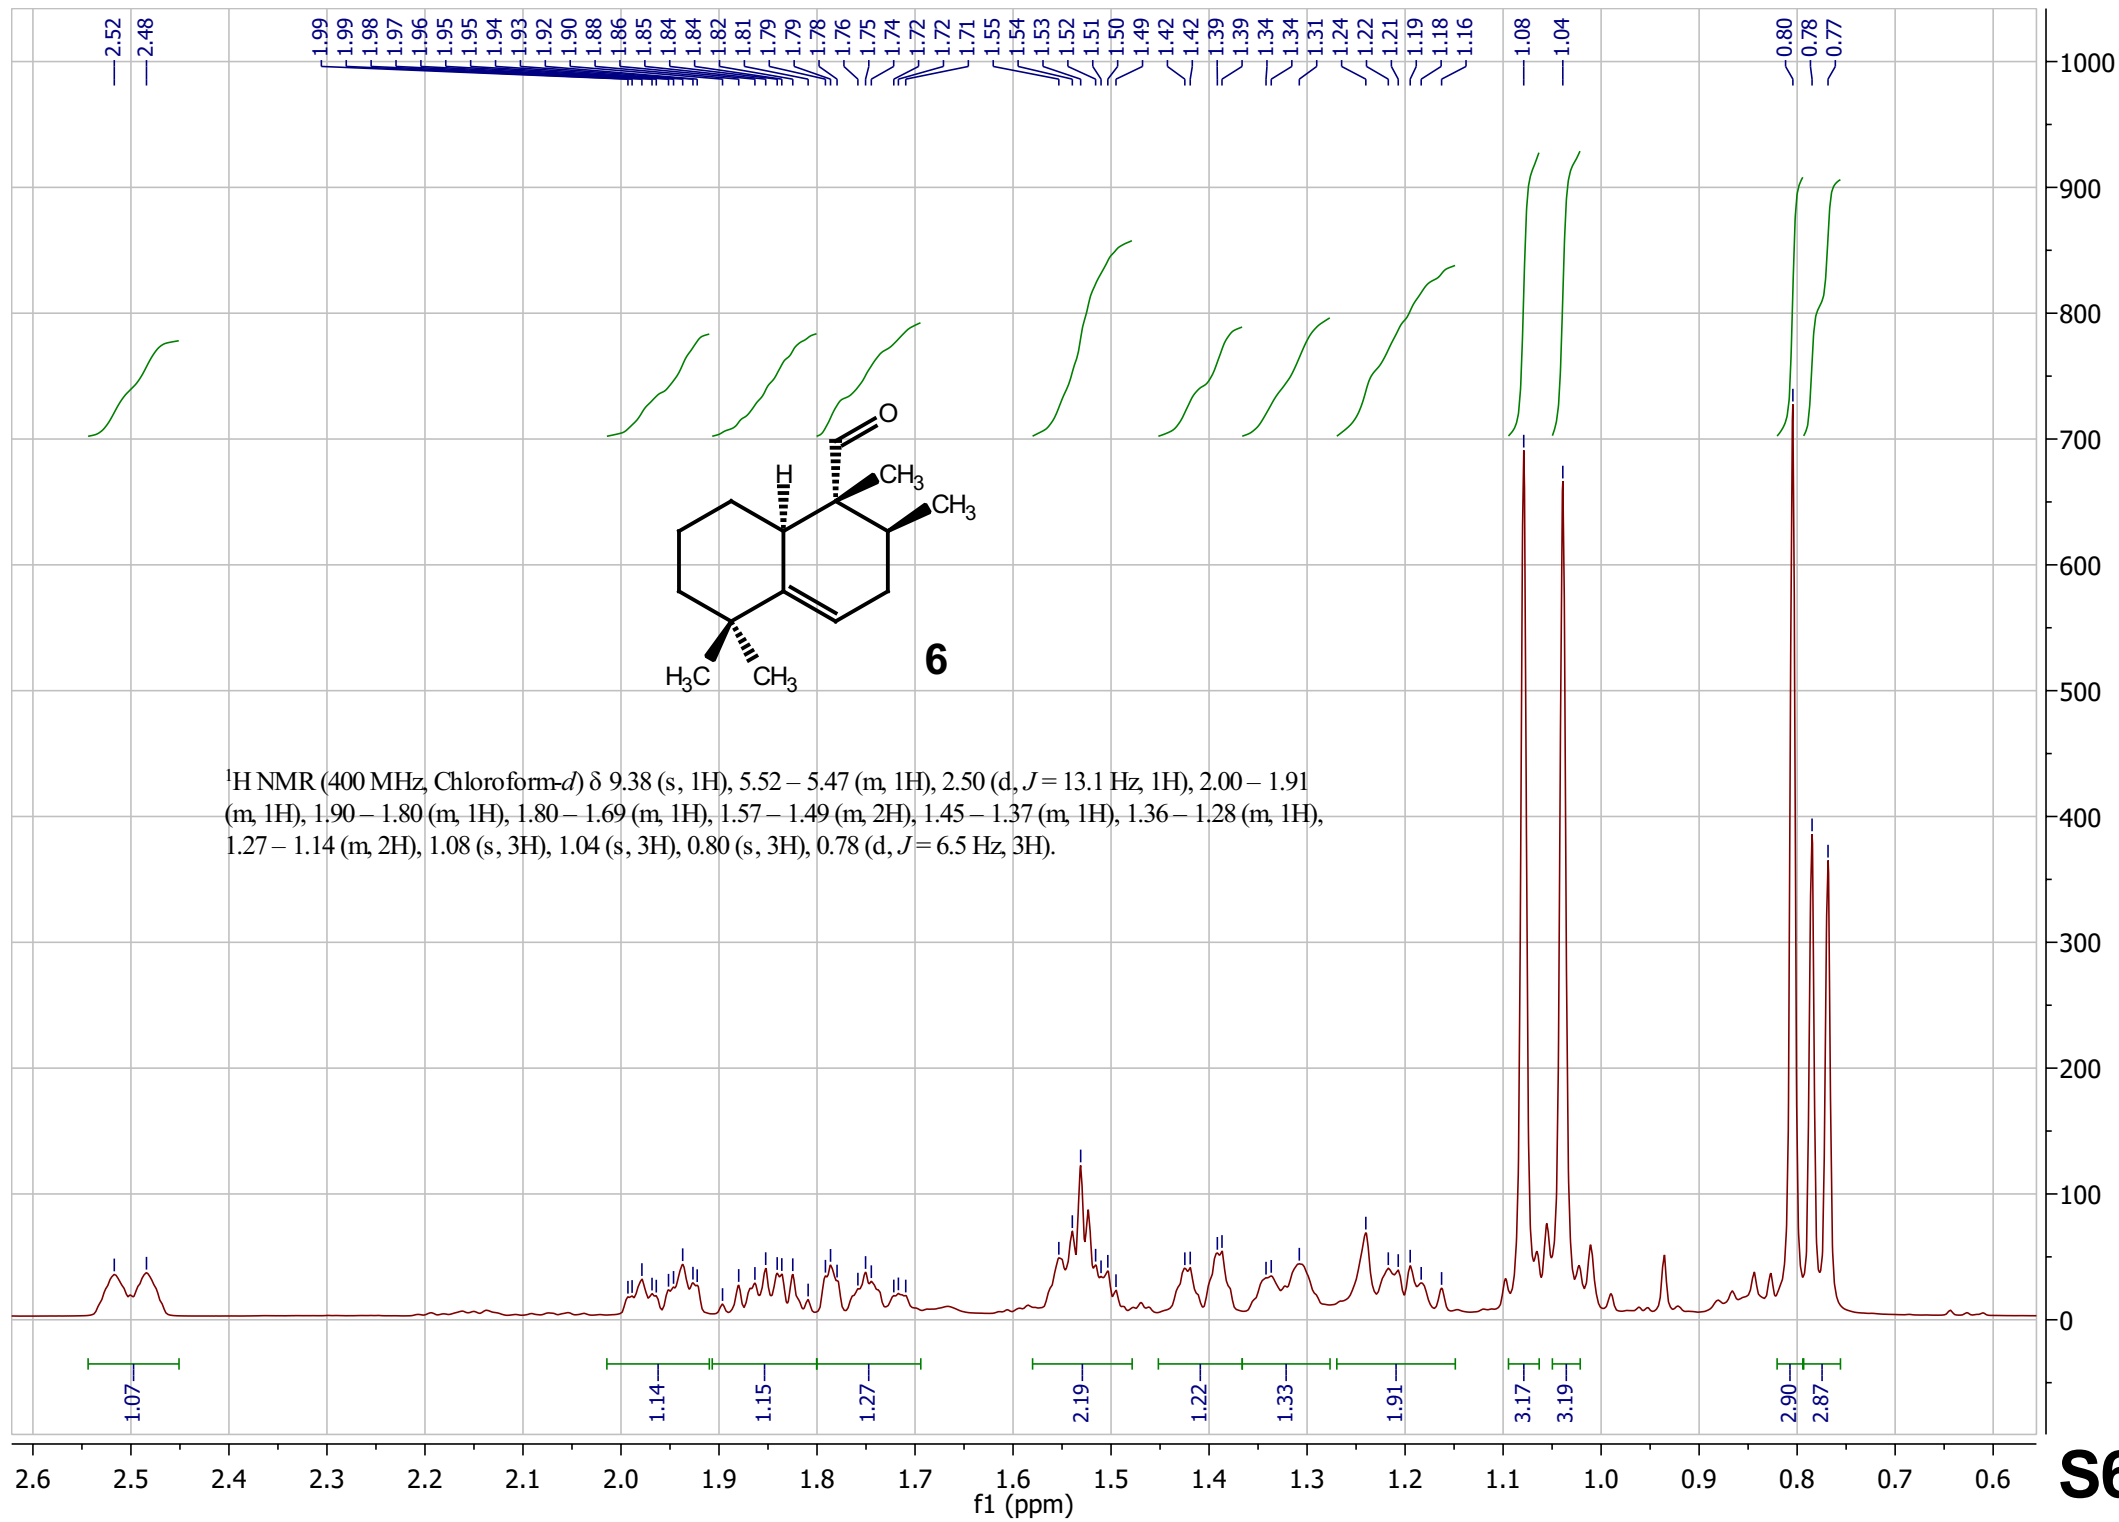

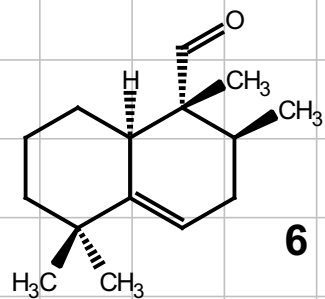

$^{13}\text{C}$  NMR (101 MHz,  $\text{cdCl}_3$ )  $\delta$  207.16, 143.92, 116.56, 52.26, 40.61, 38.15, 36.28, 32.65, 30.47, 29.66, 29.13, 28.68, 21.77, 16.14, 7.49.

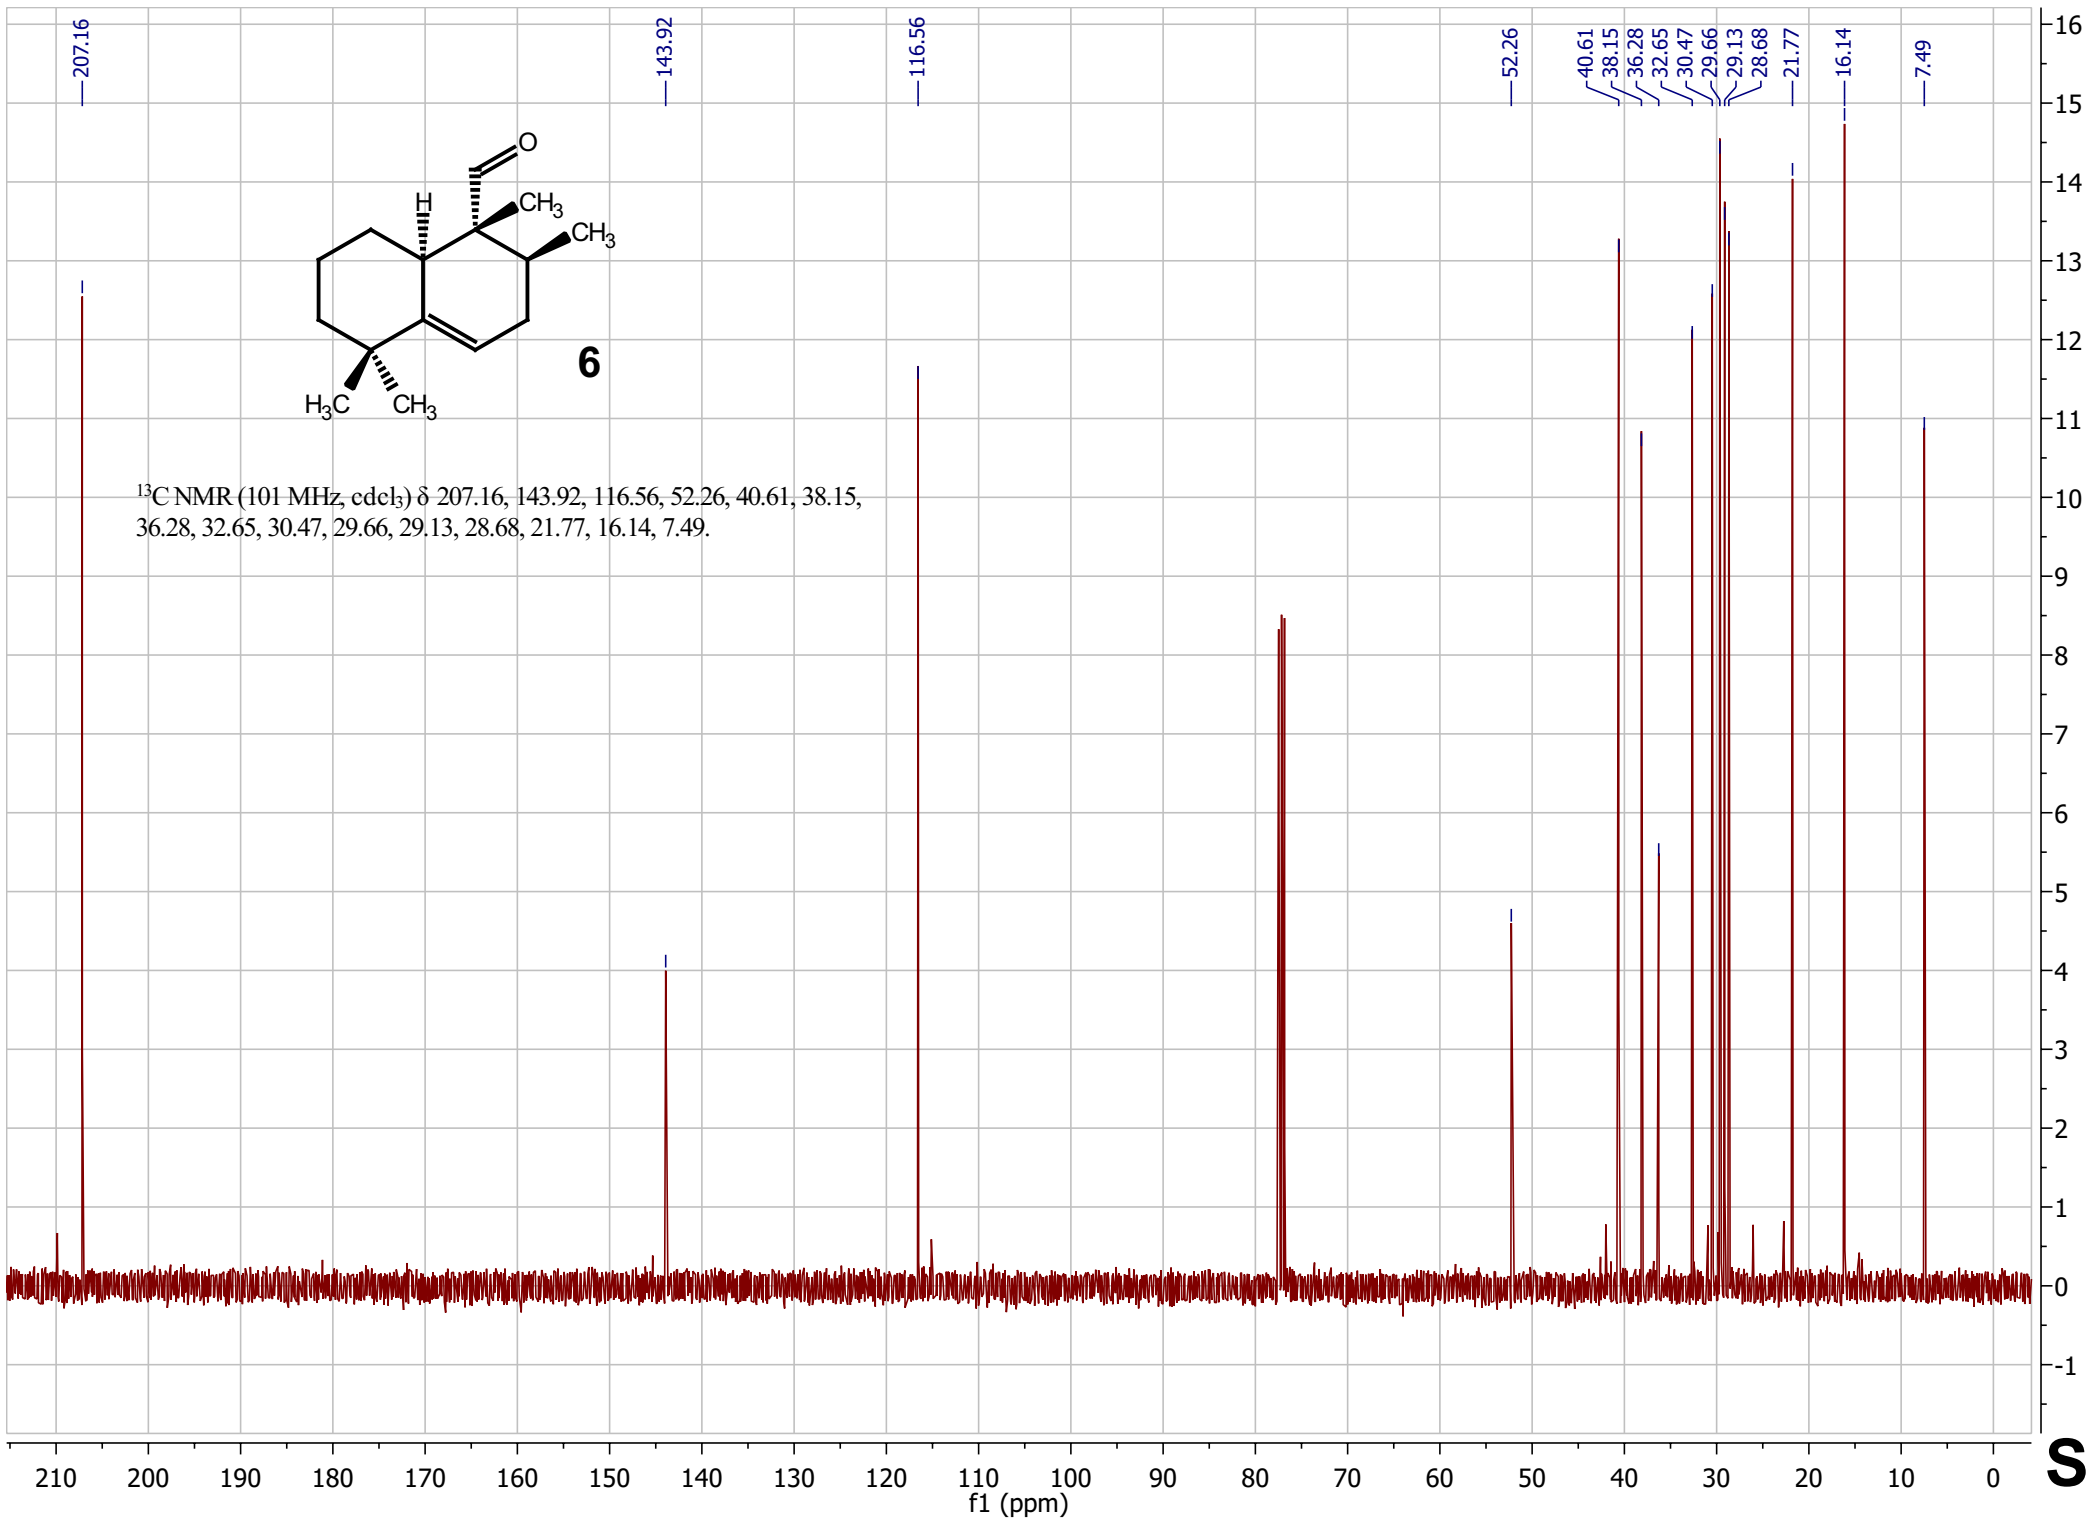

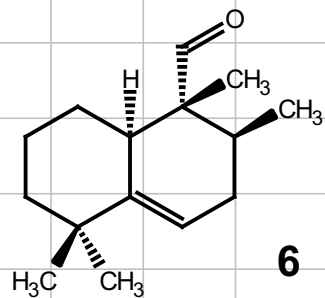

$^{13}\text{C}$ NMR (101 MHz,  $\text{cdCl}_3$ )  $\delta$  207.16, 143.92, 116.56, 52.26, 40.62, 38.16, 36.28, 32.65, 30.48, 29.66, 29.13, 28.68, 21.78, 16.14, 7.49.

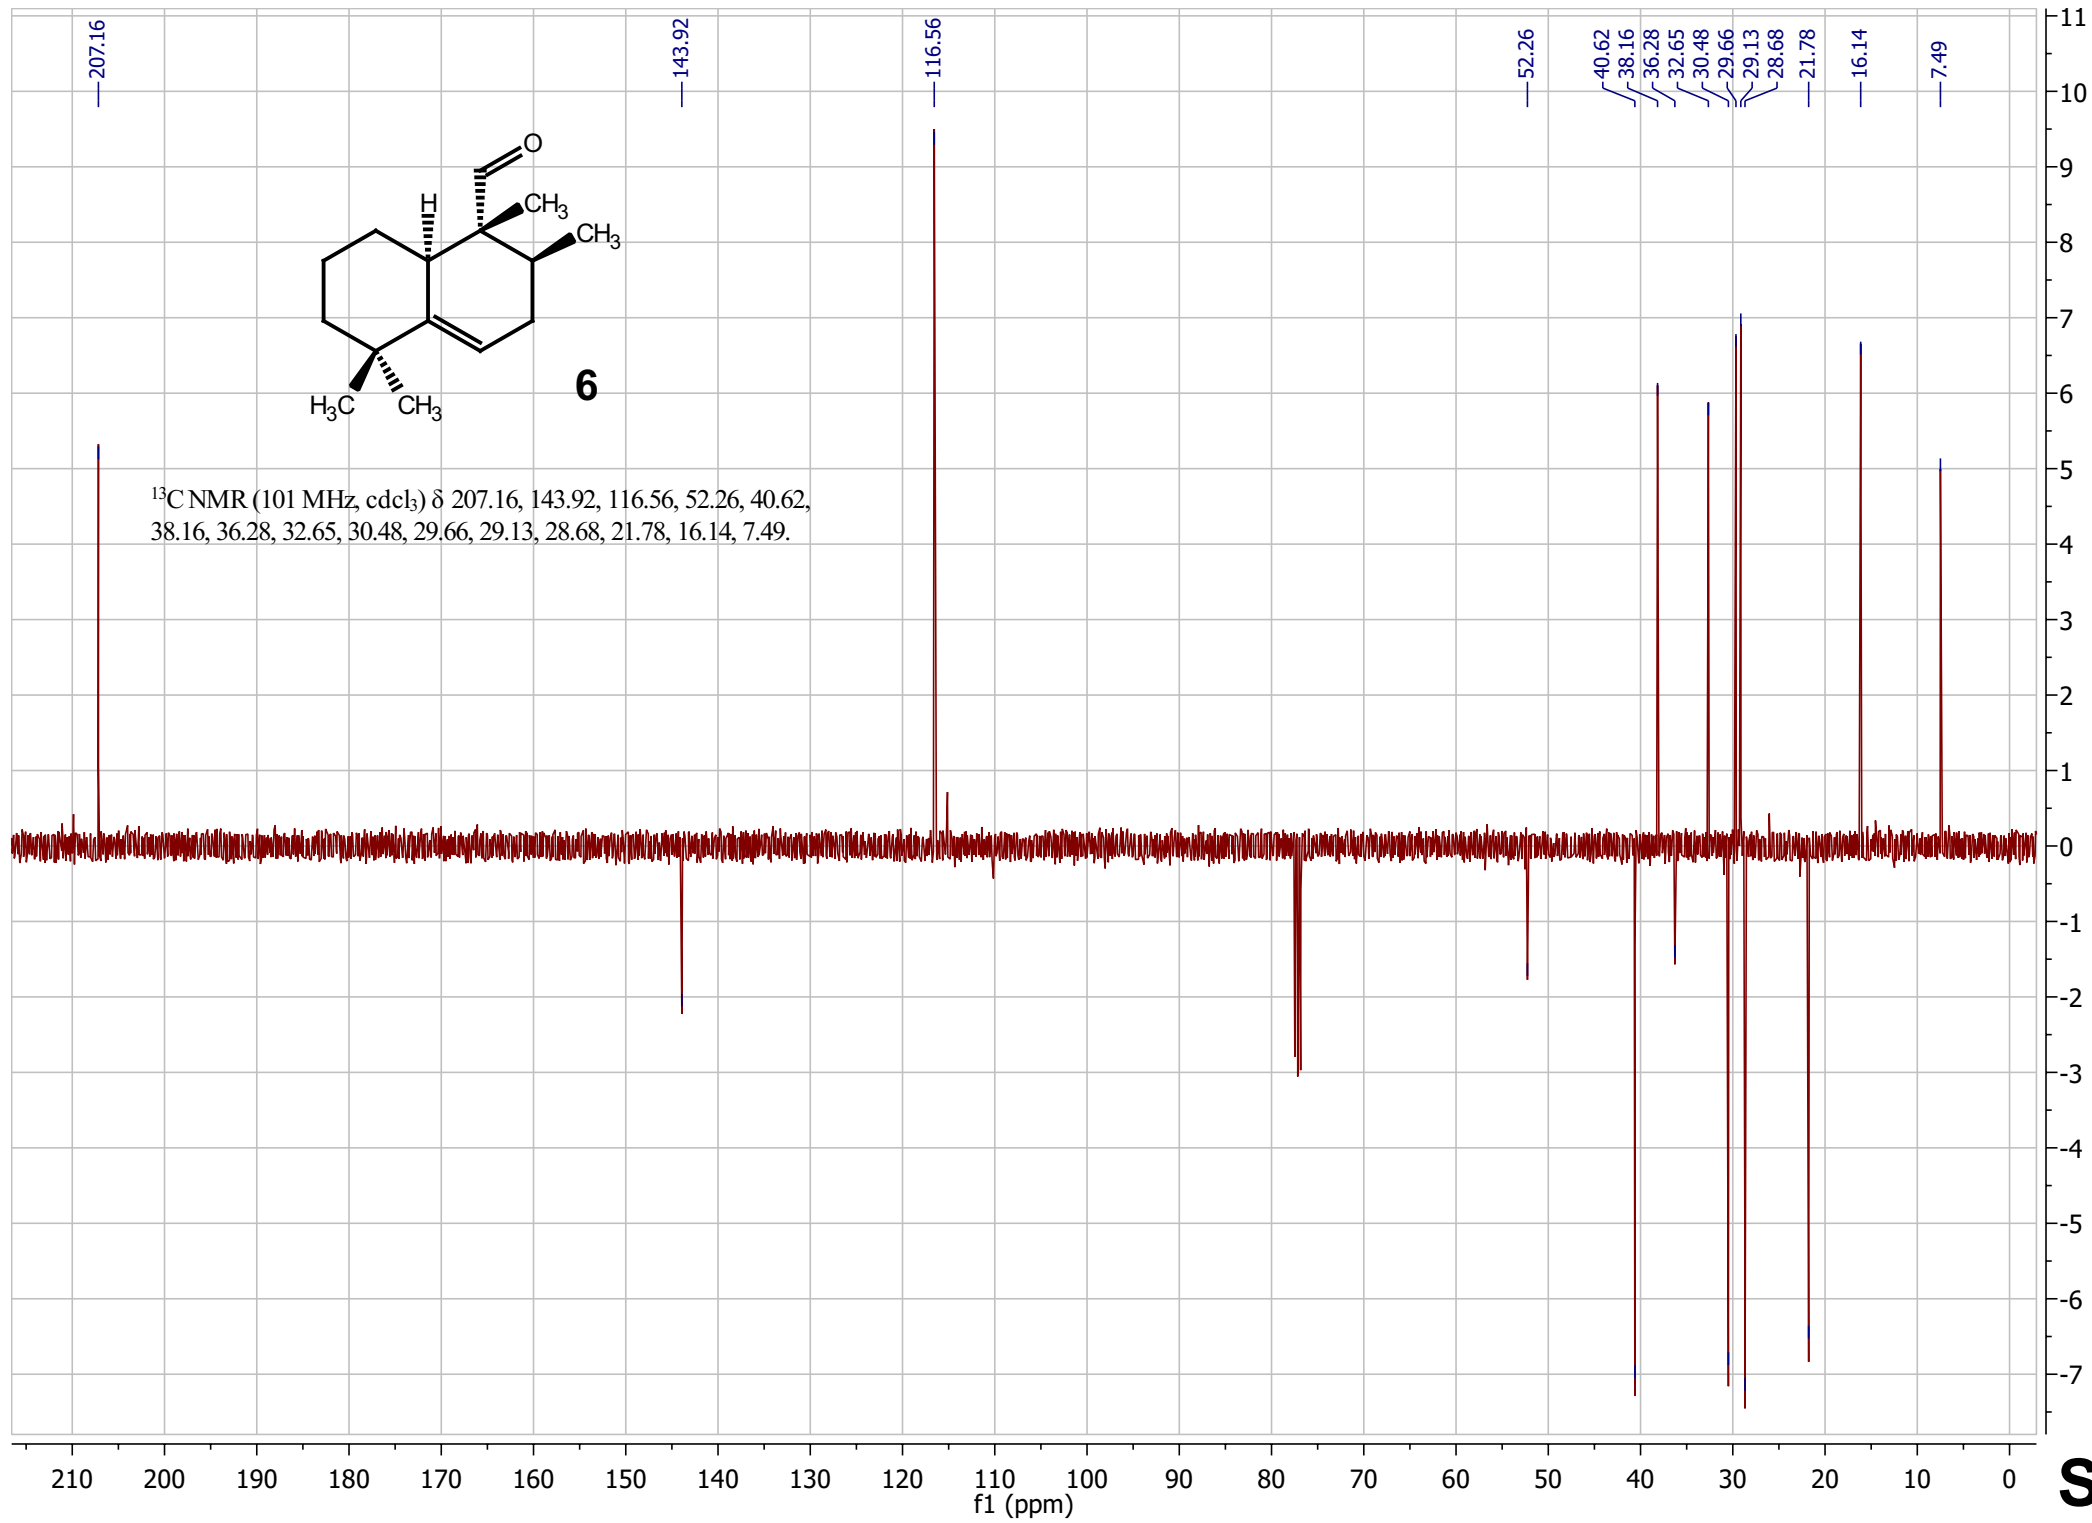

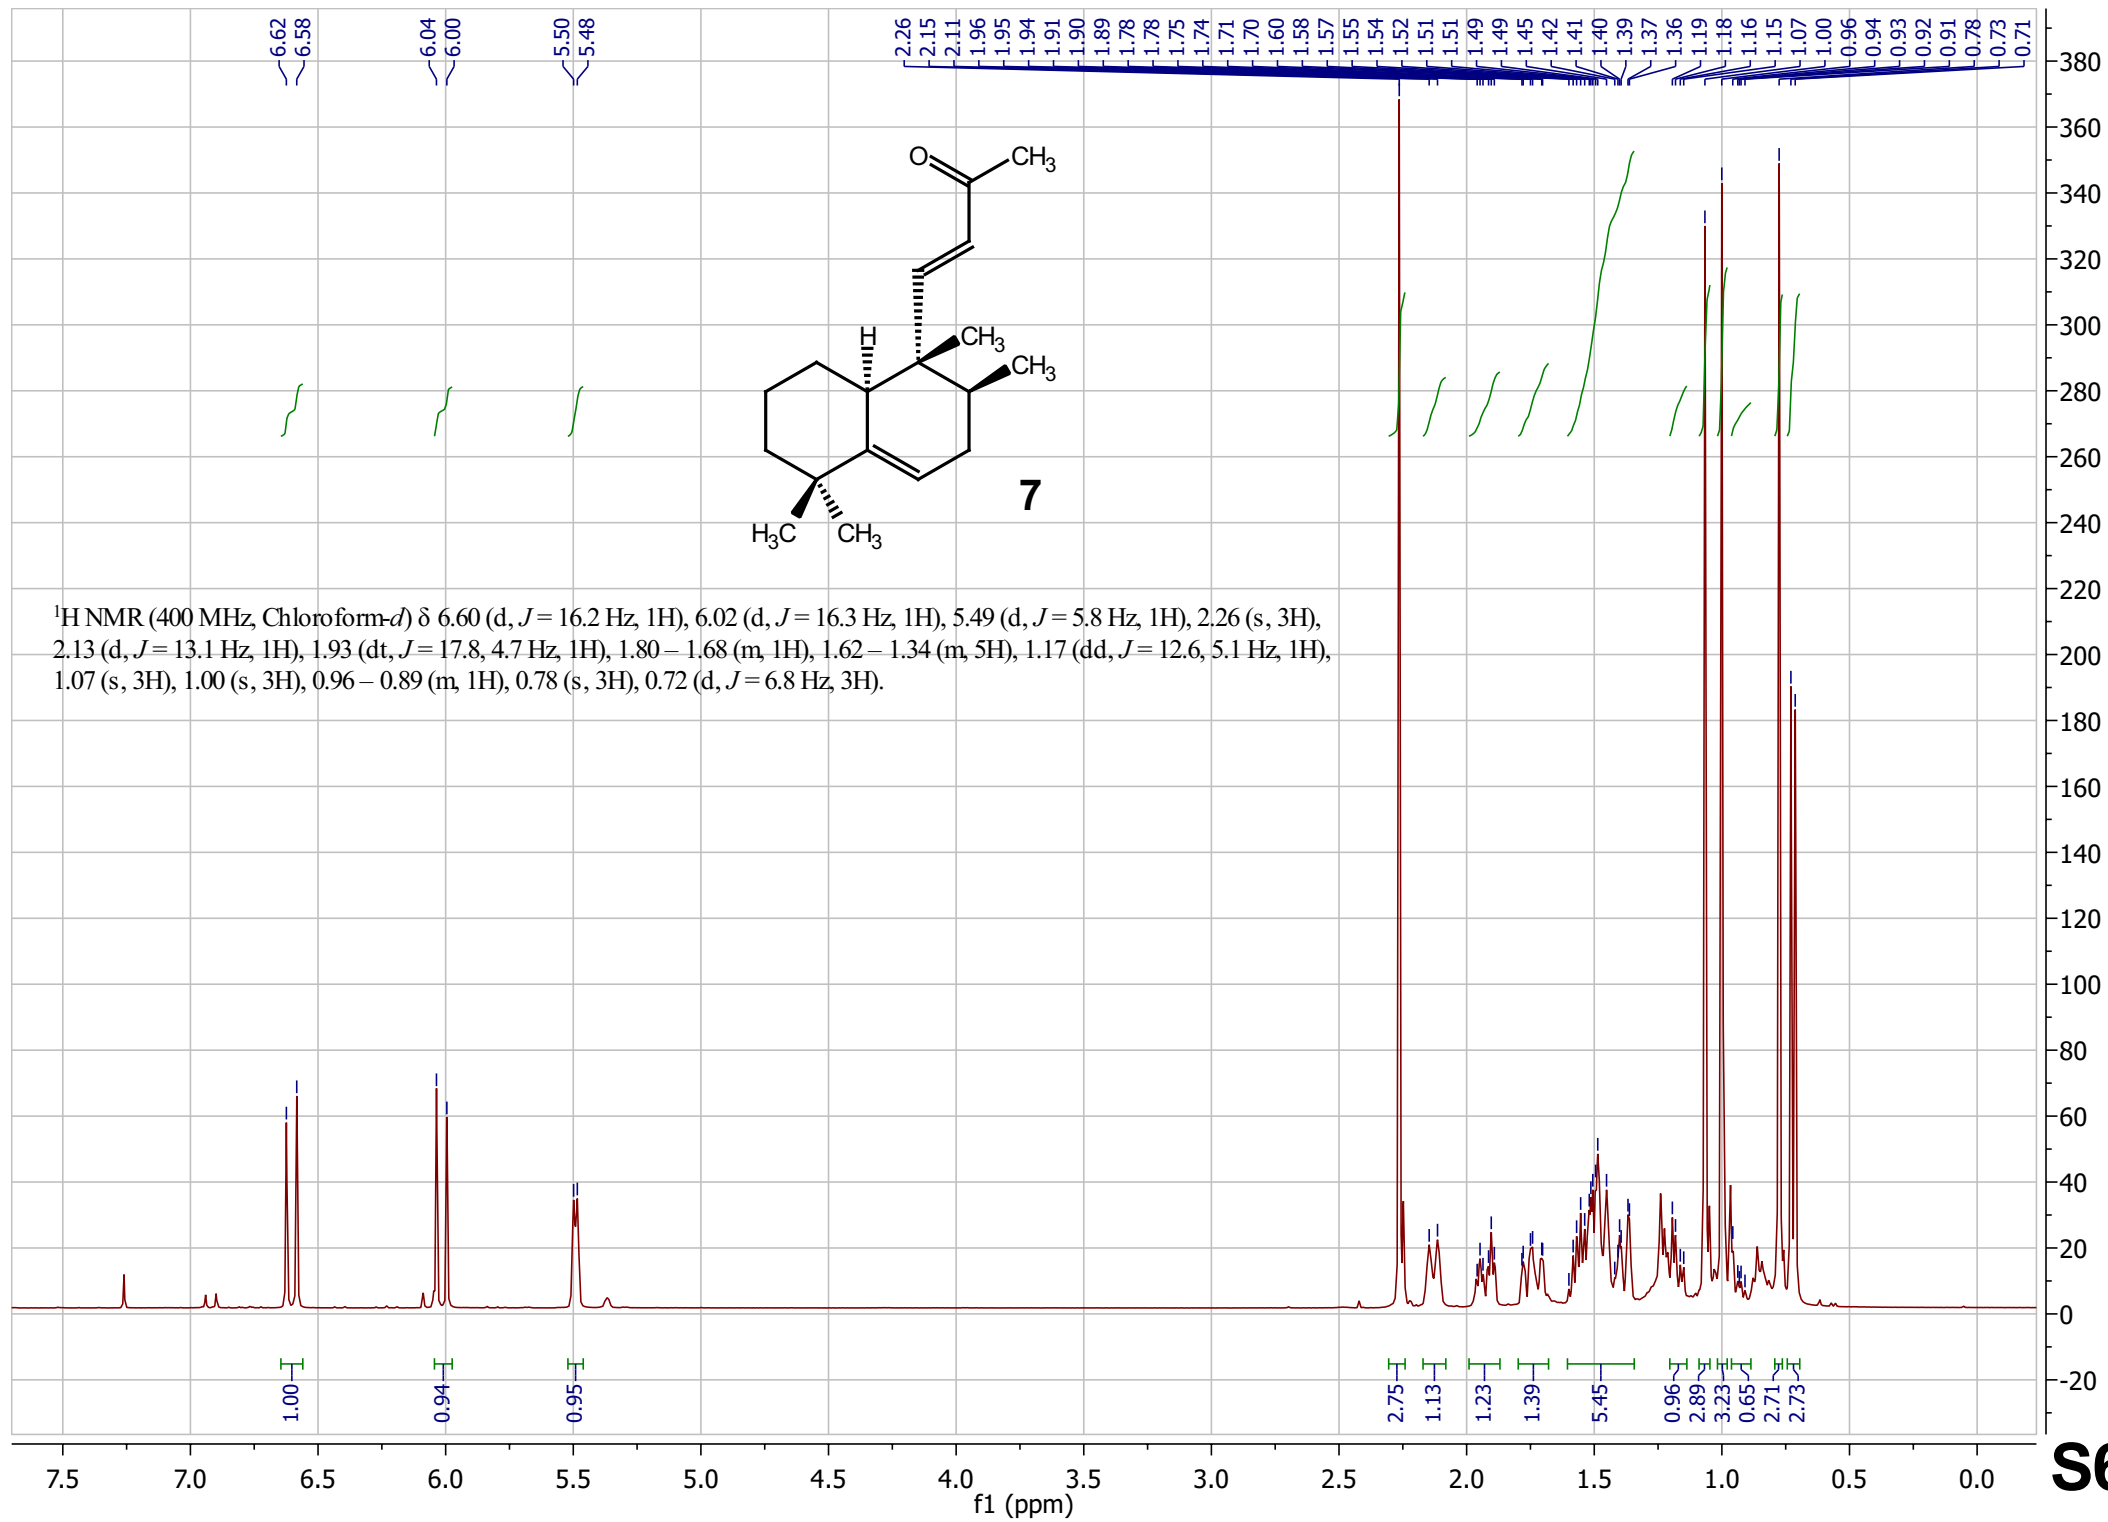



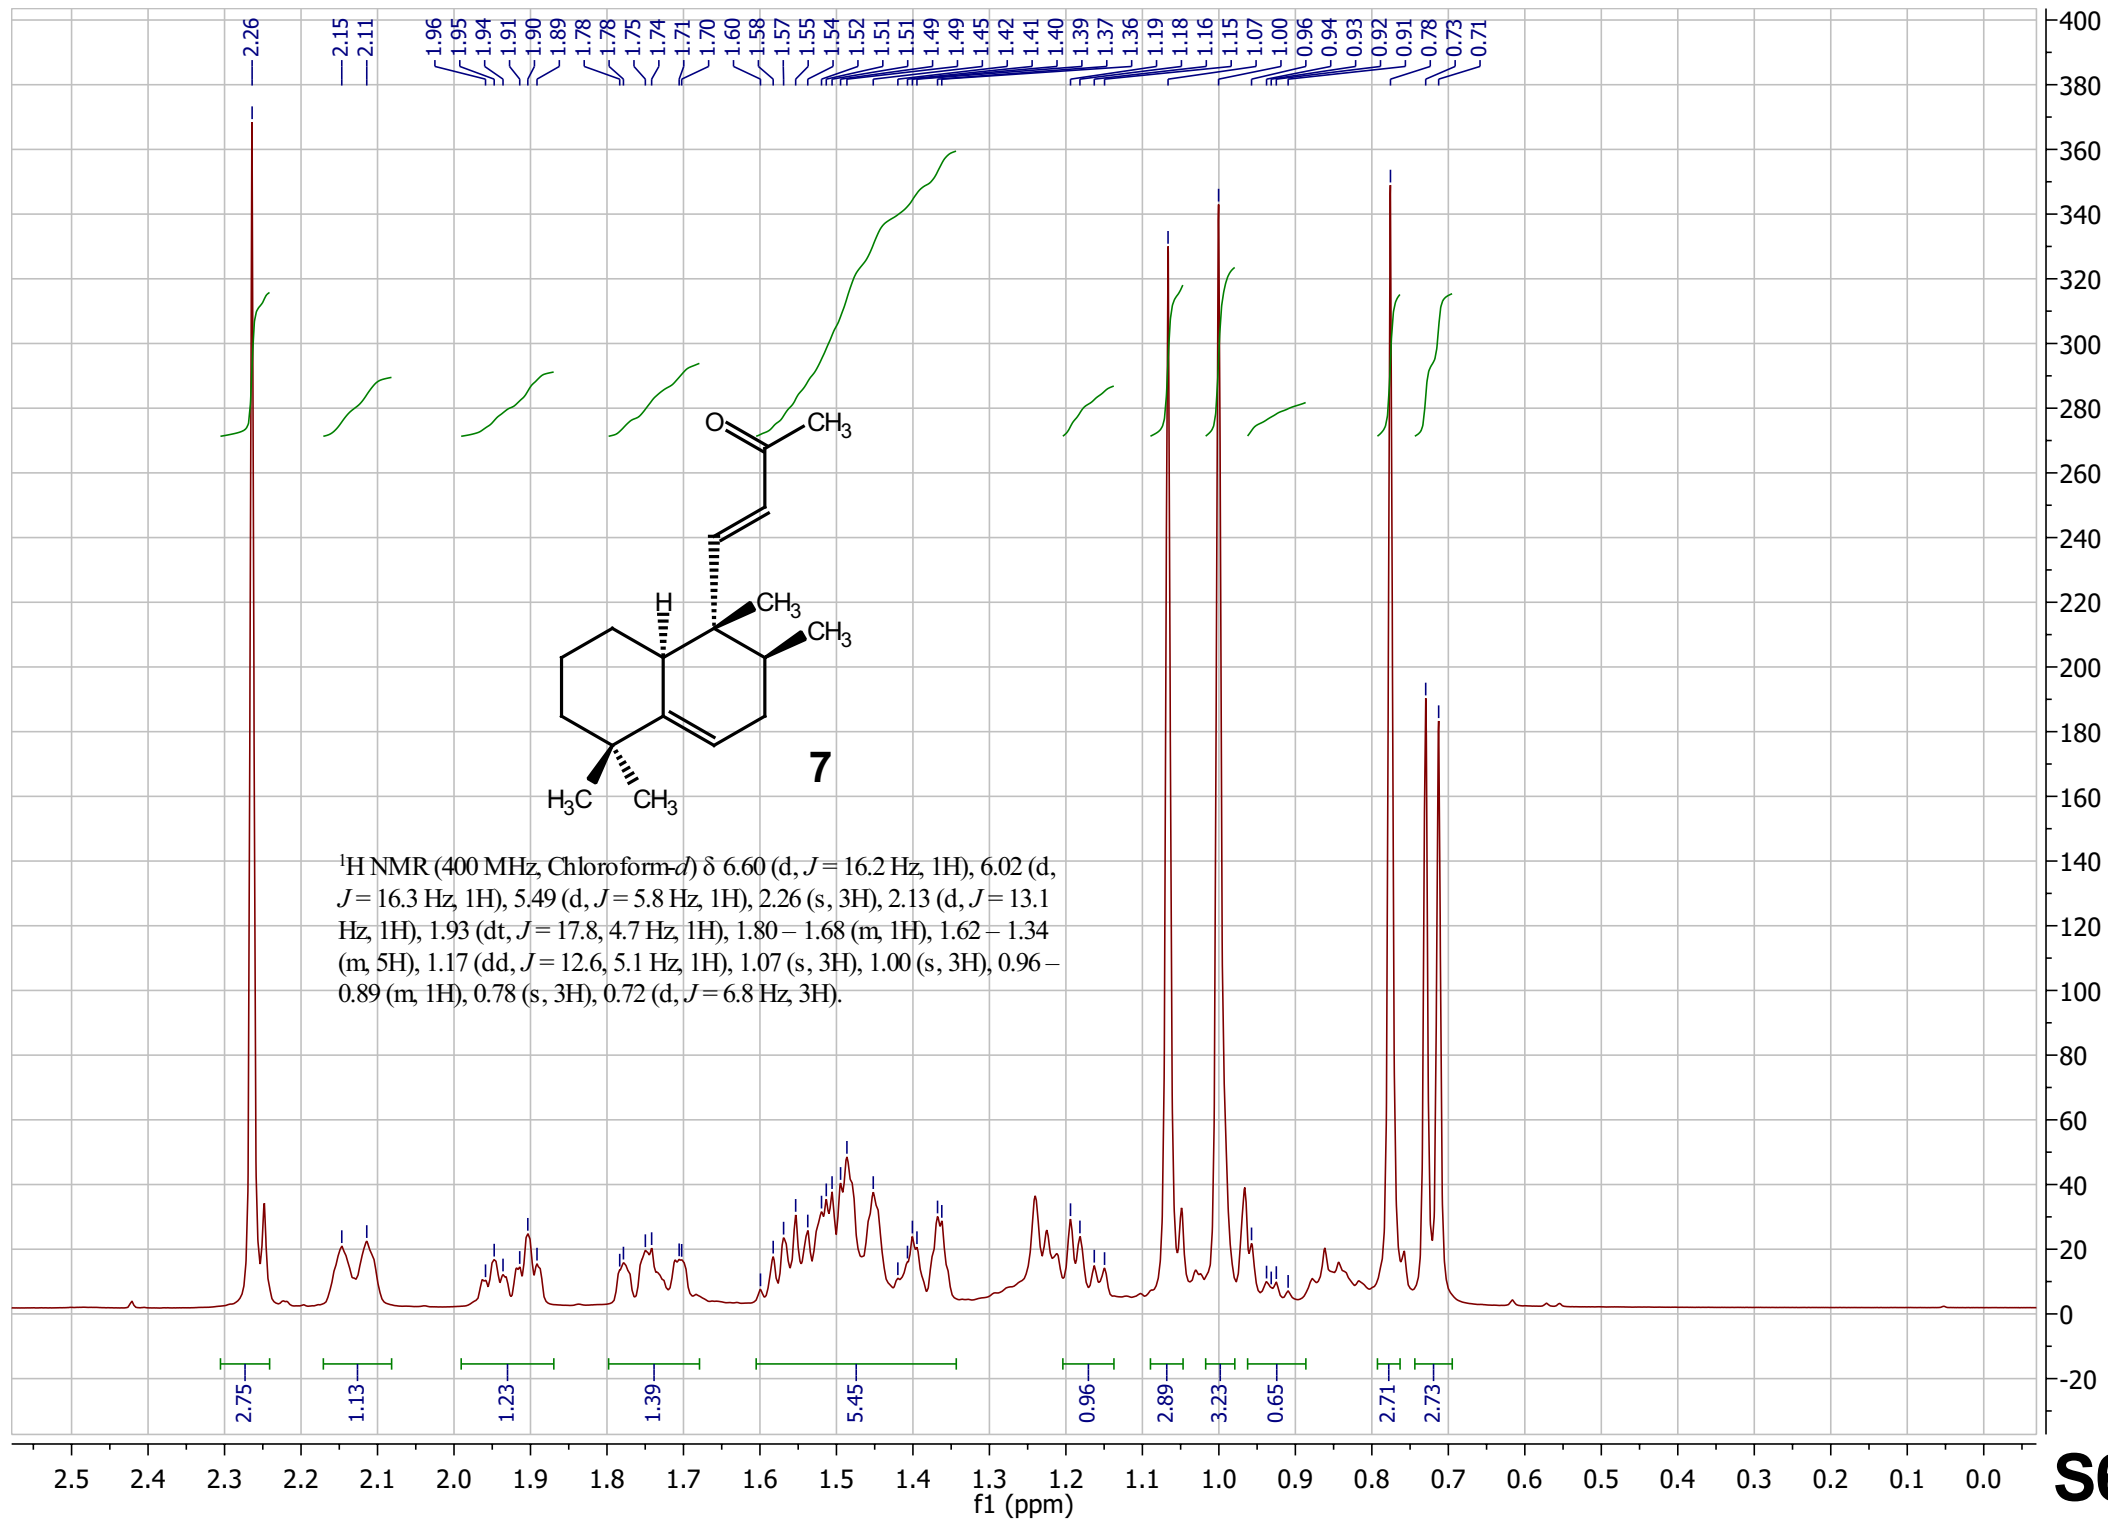

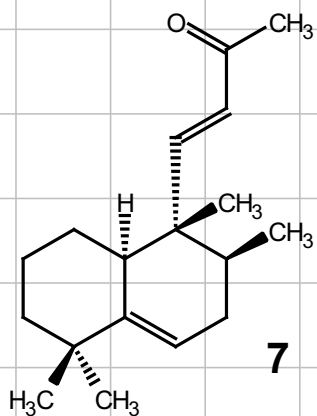

$^{13}\text{C}$  NMR (101 MHz,  $\text{cdCl}_3$ )  $\delta$  198.72, 158.19, 144.73, 129.58, 116.47, 43.67, 43.00, 40.77, 36.65, 36.22, 31.12, 29.67, 29.28, 28.27, 27.43, 21.96, 16.38, 10.28.

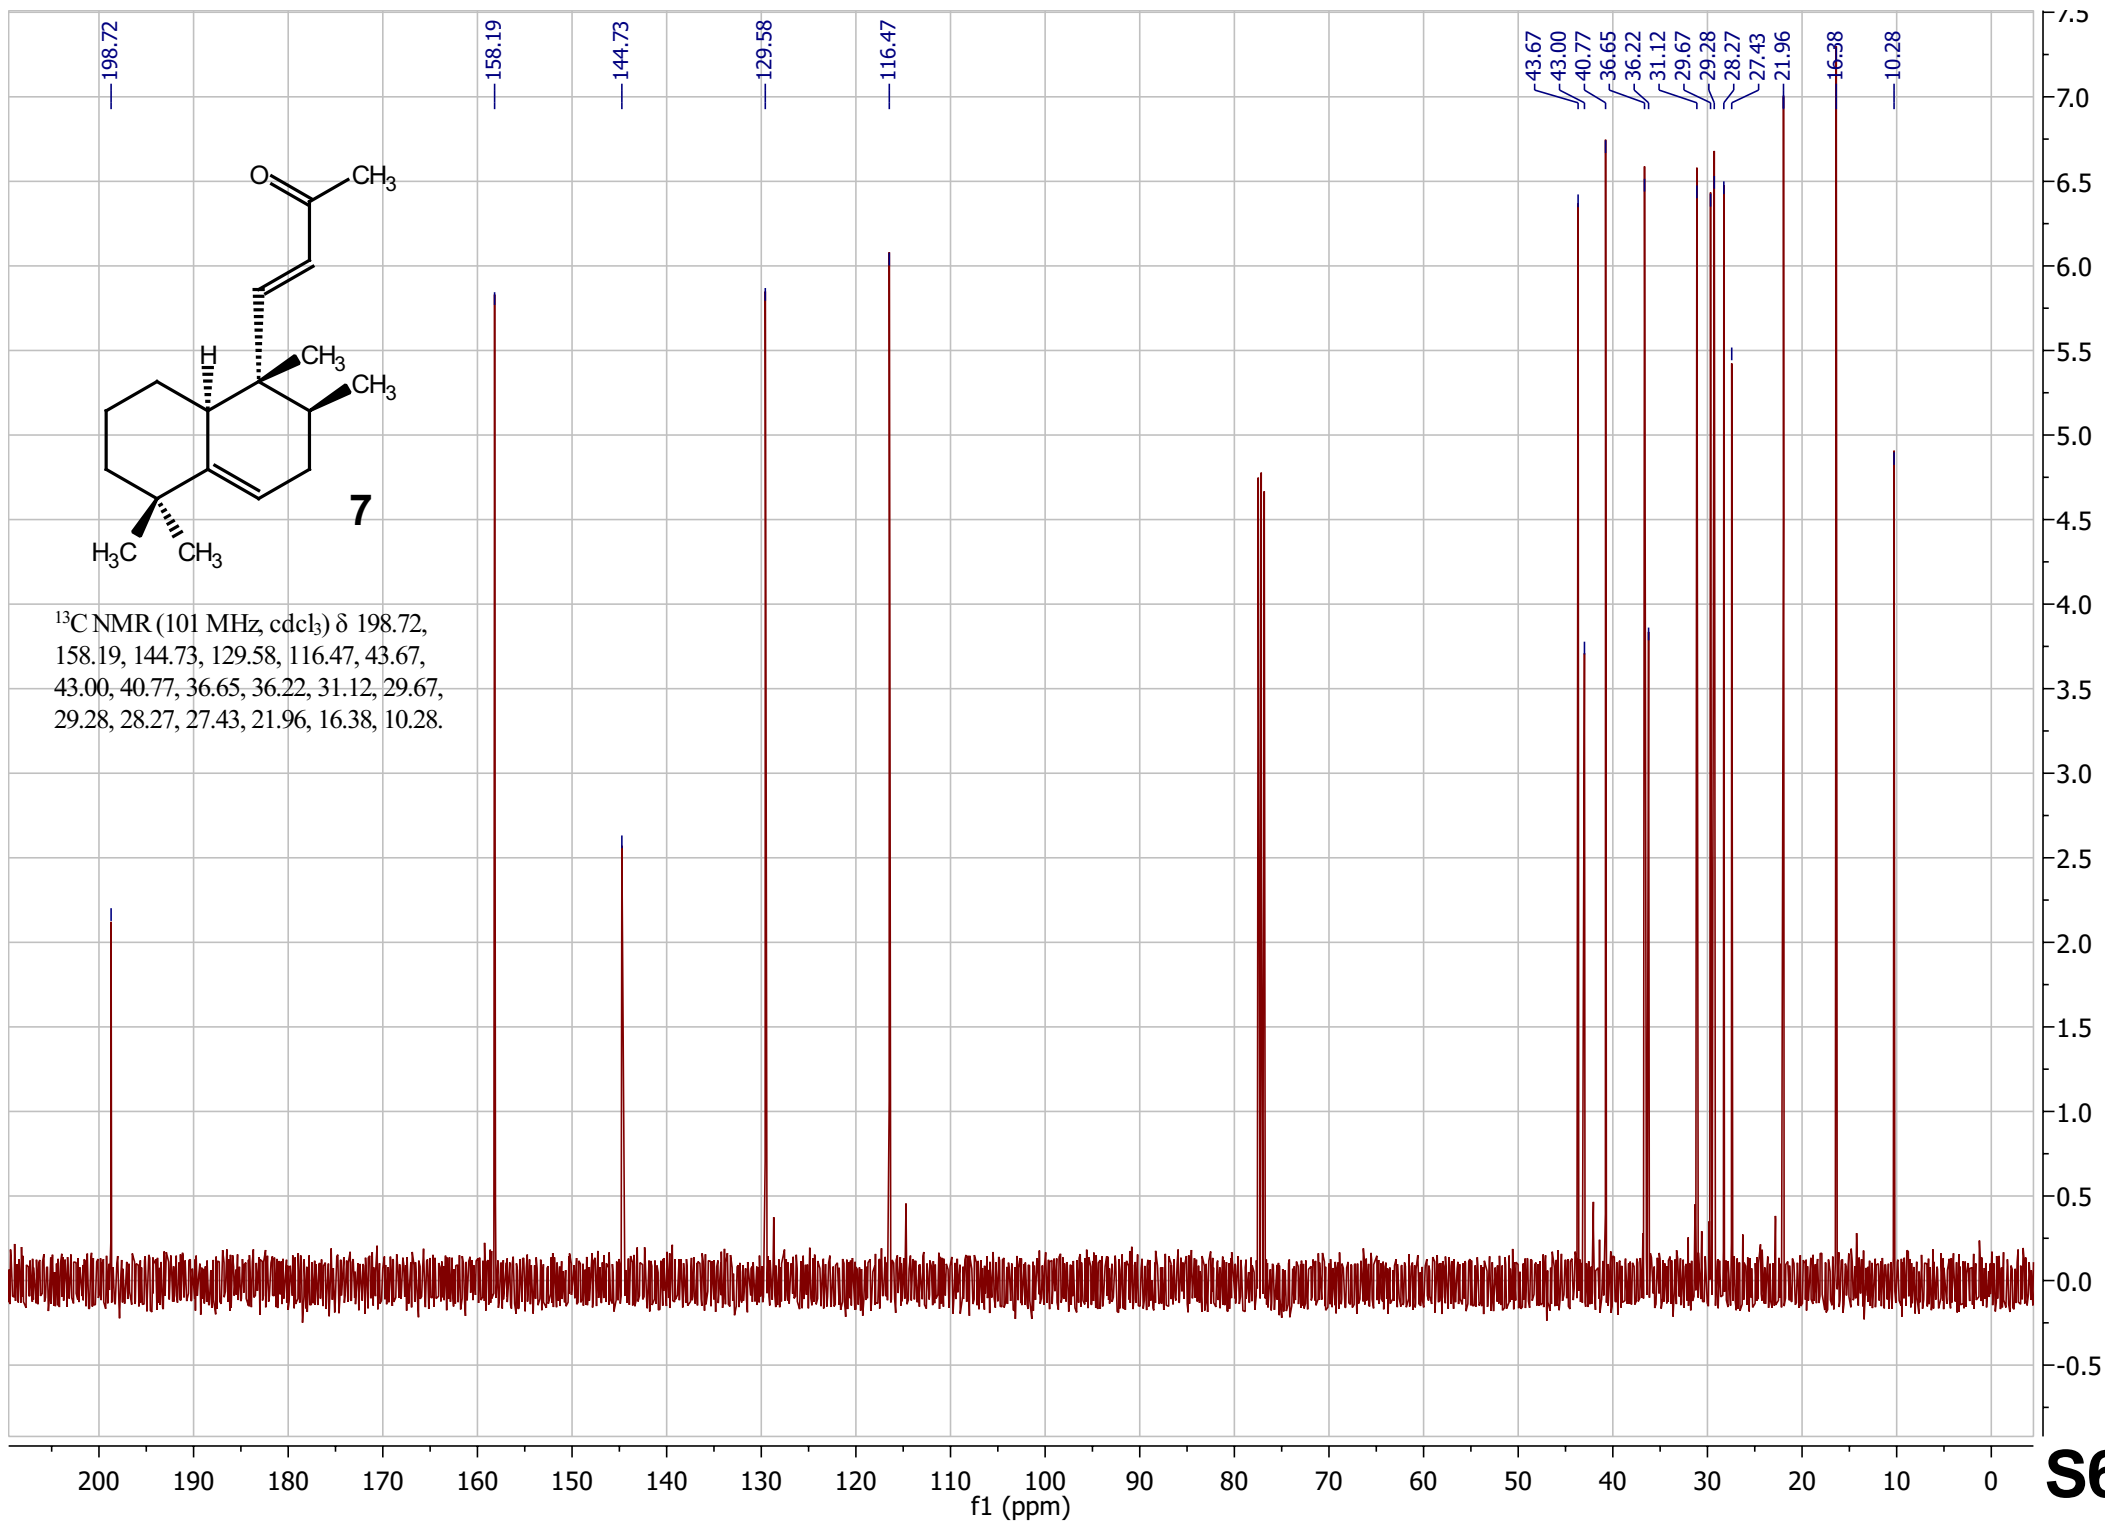

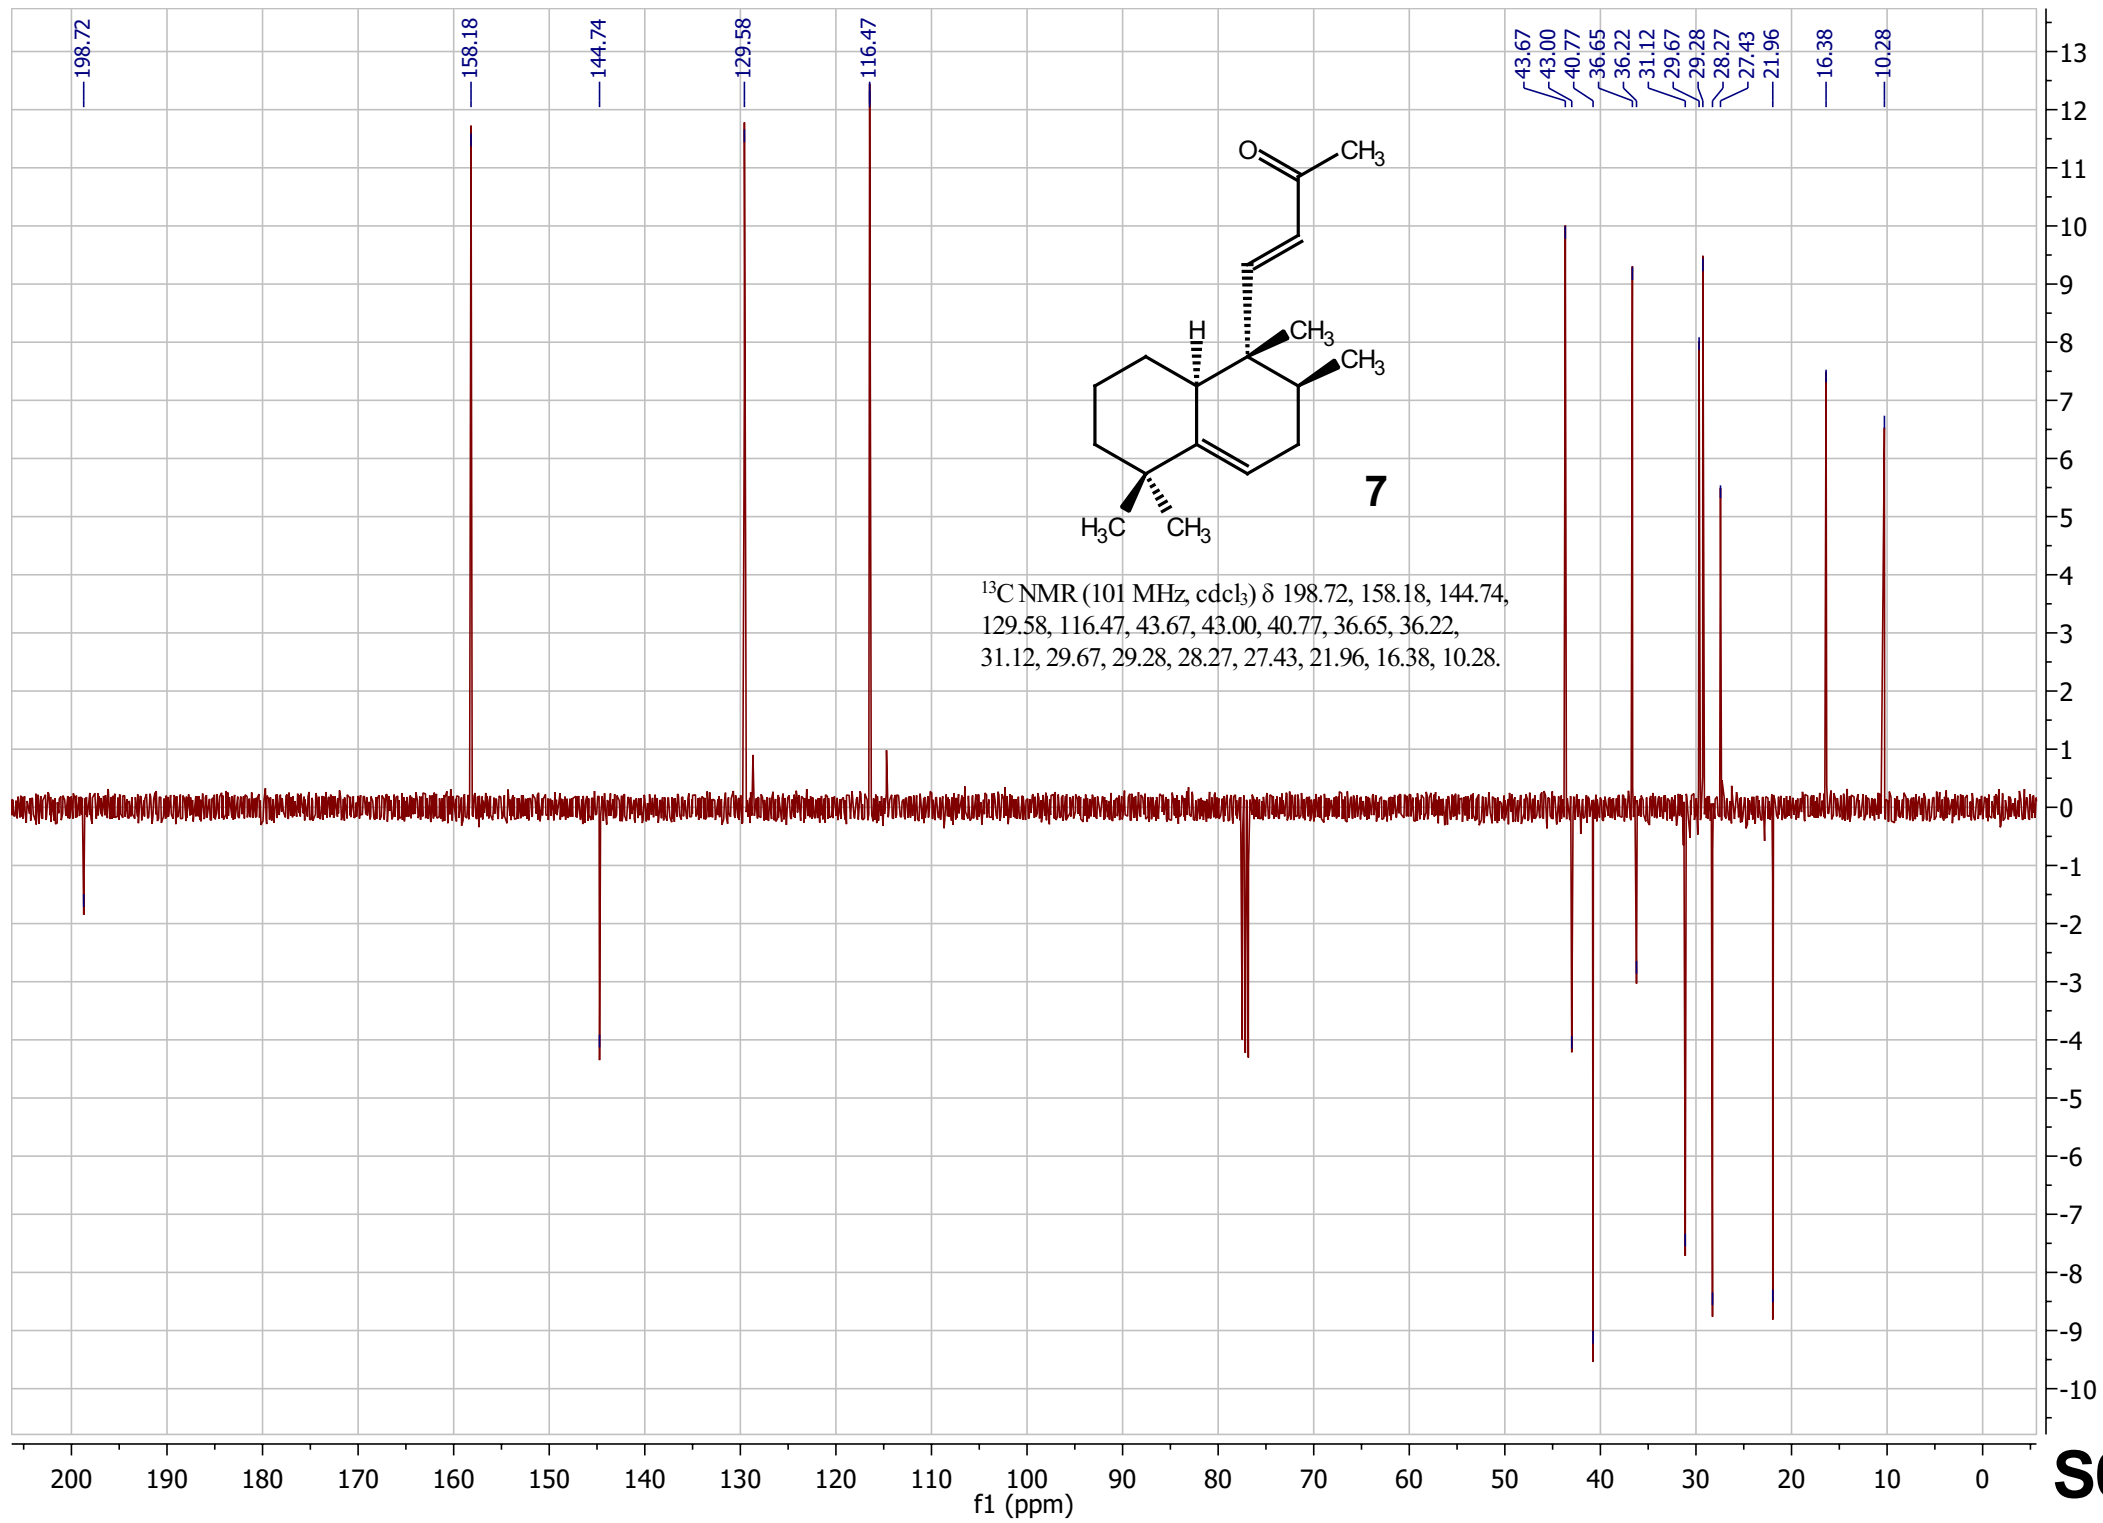

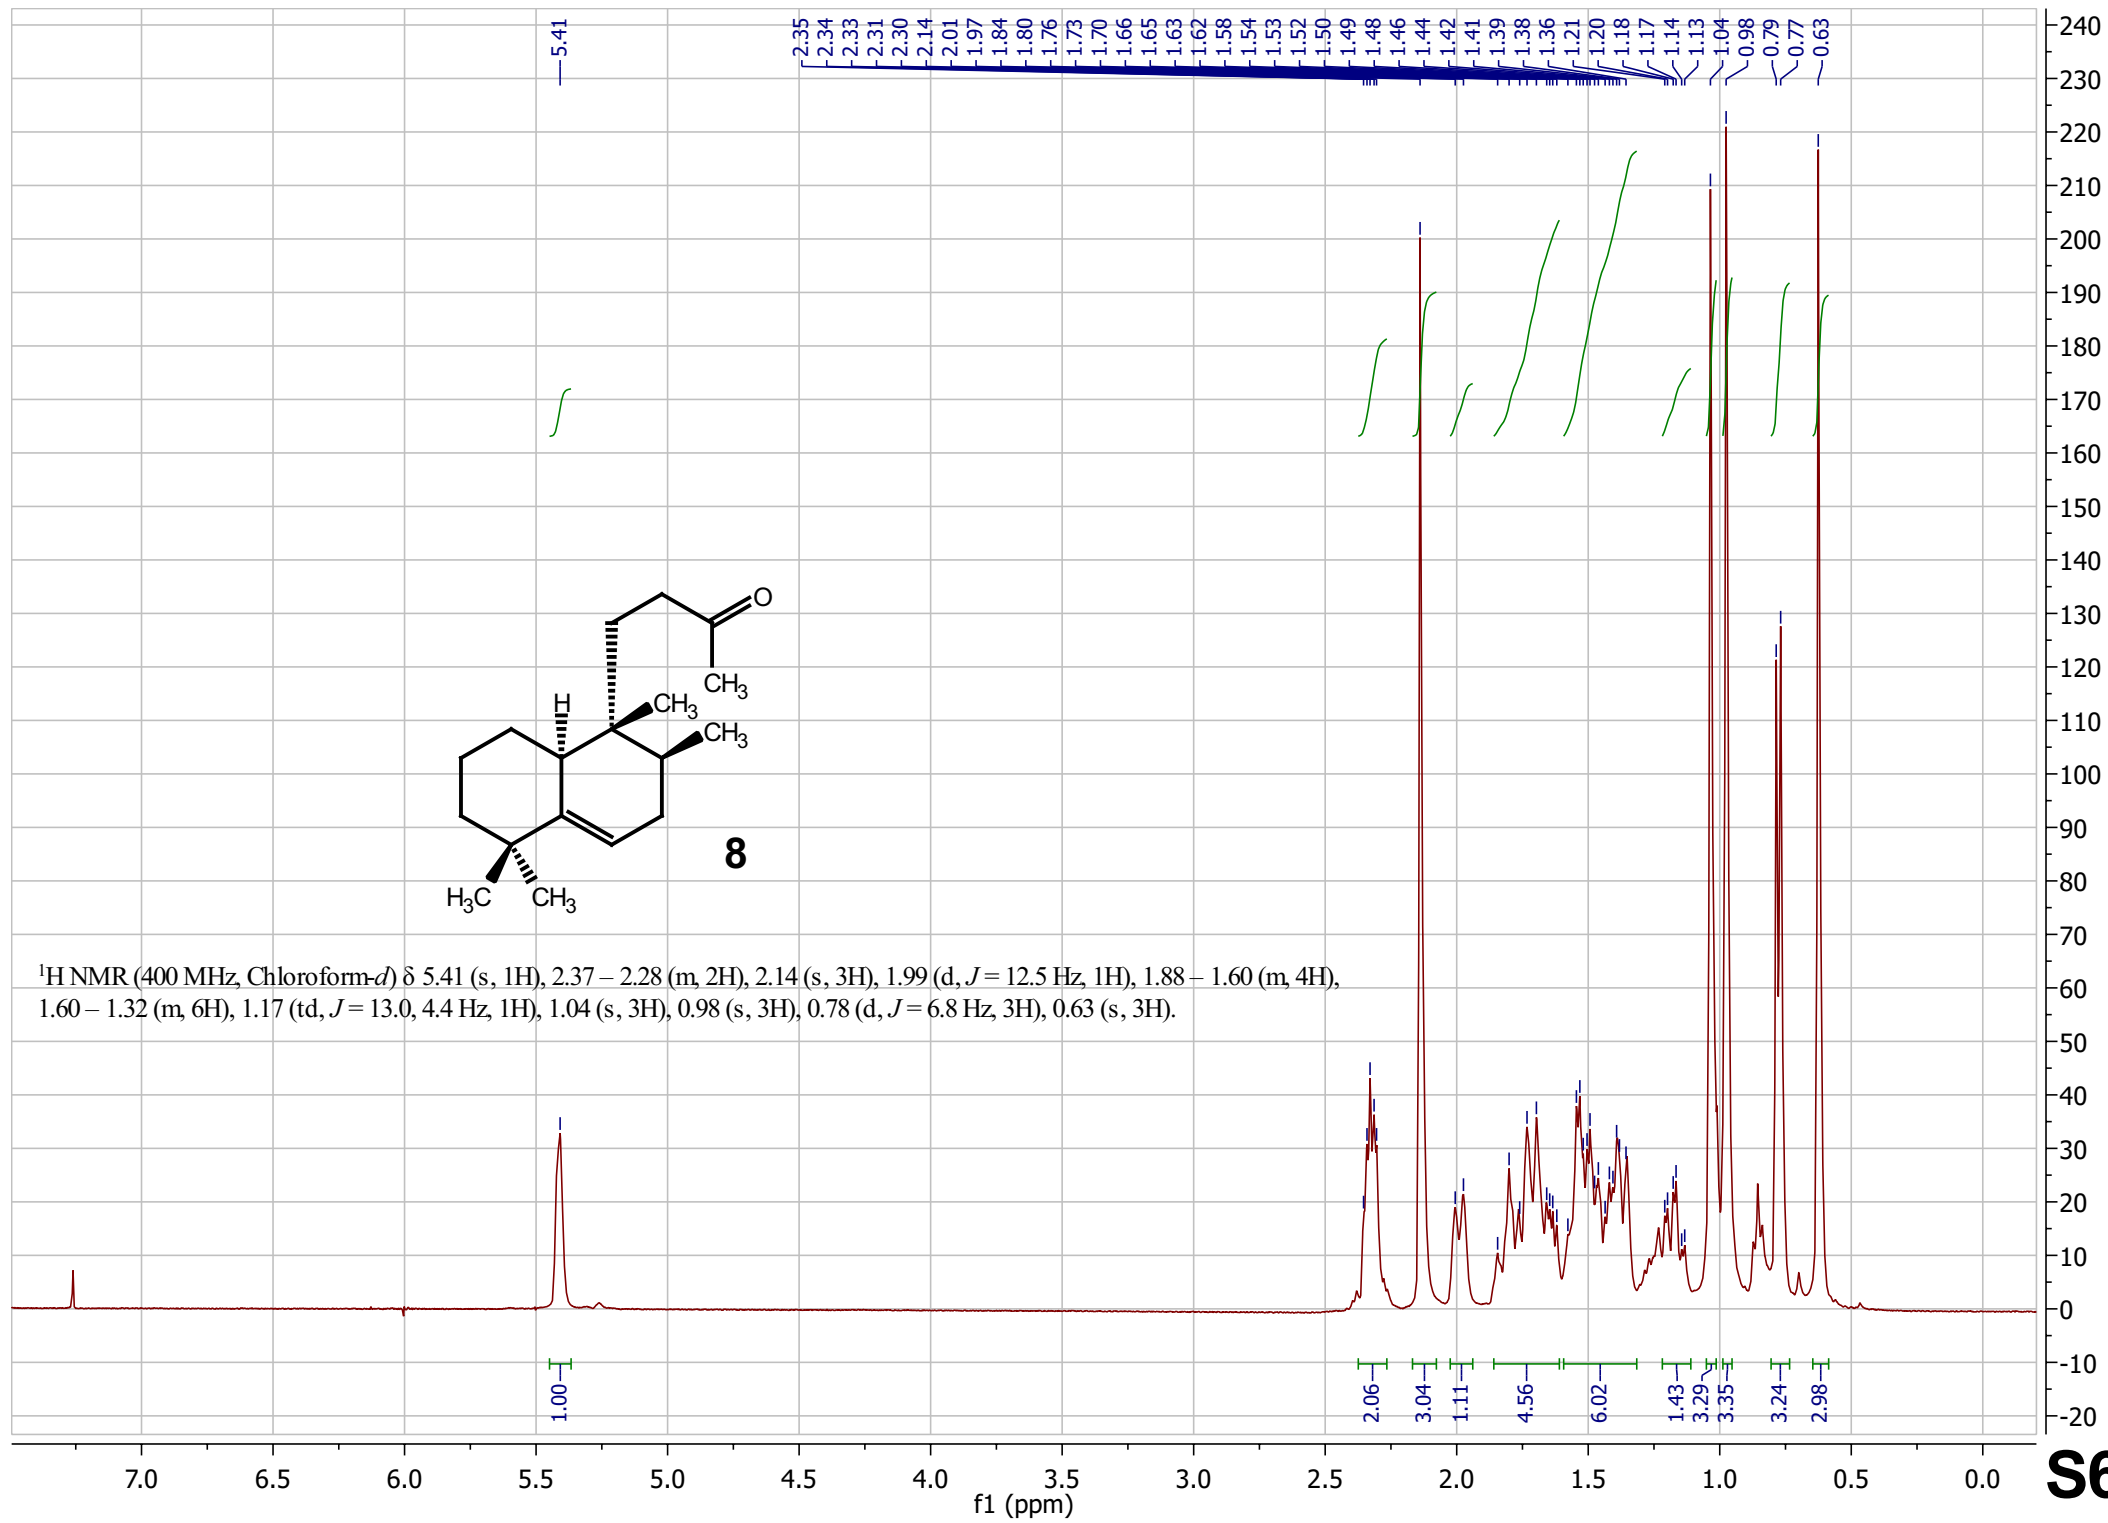

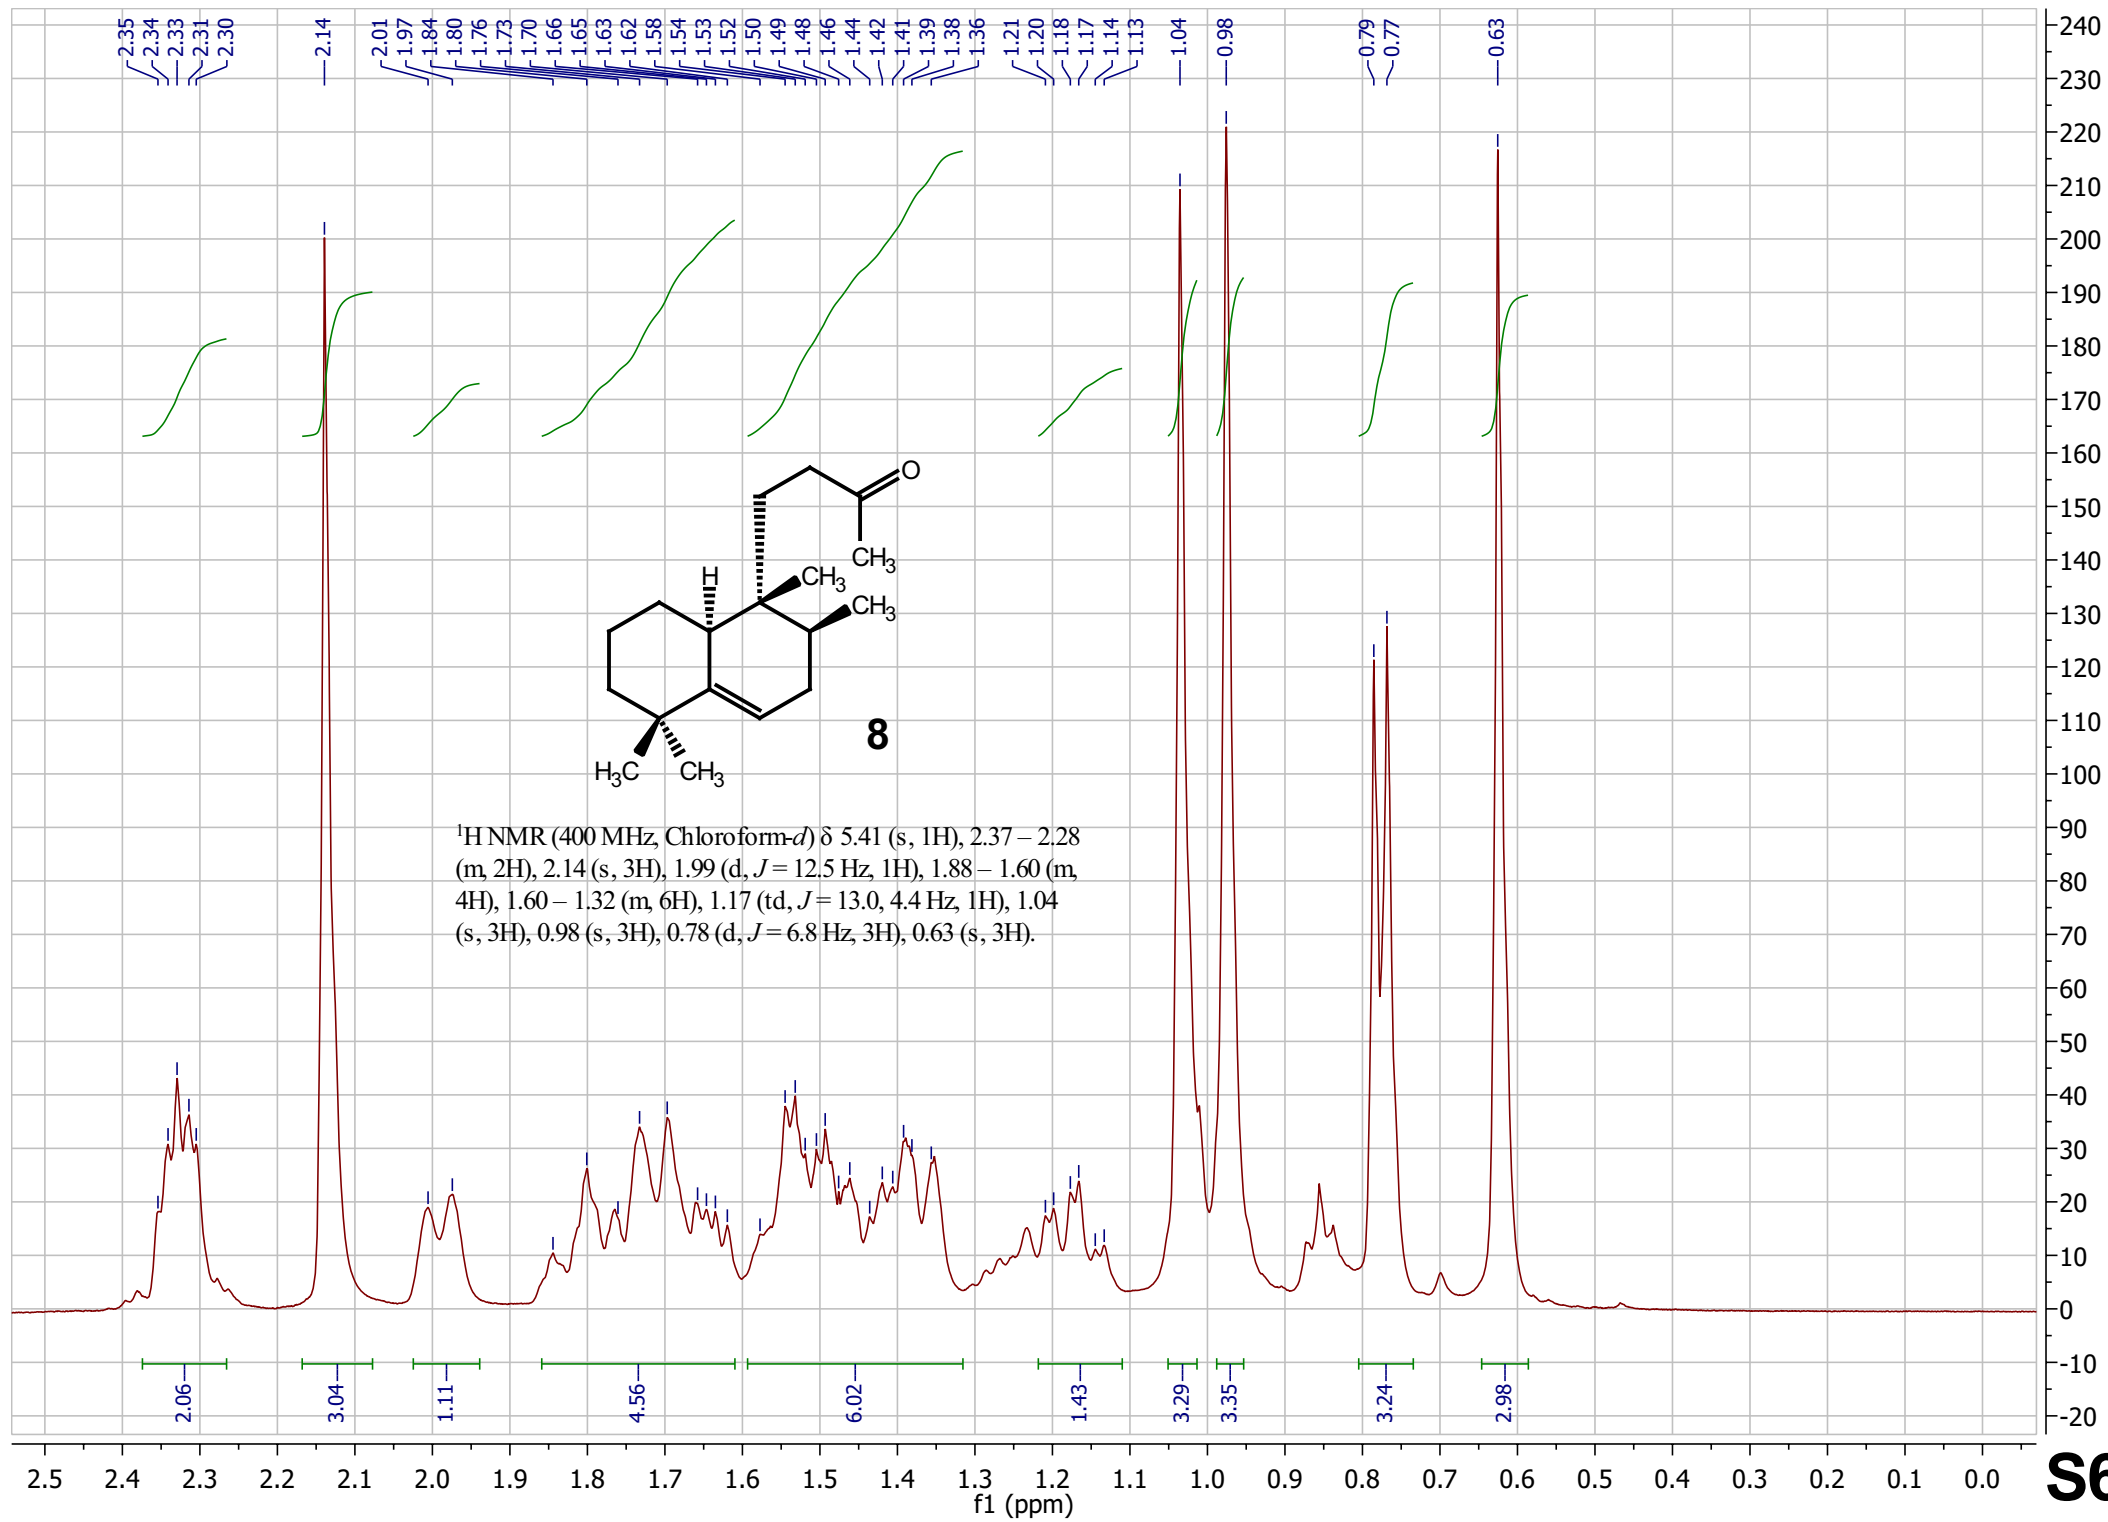

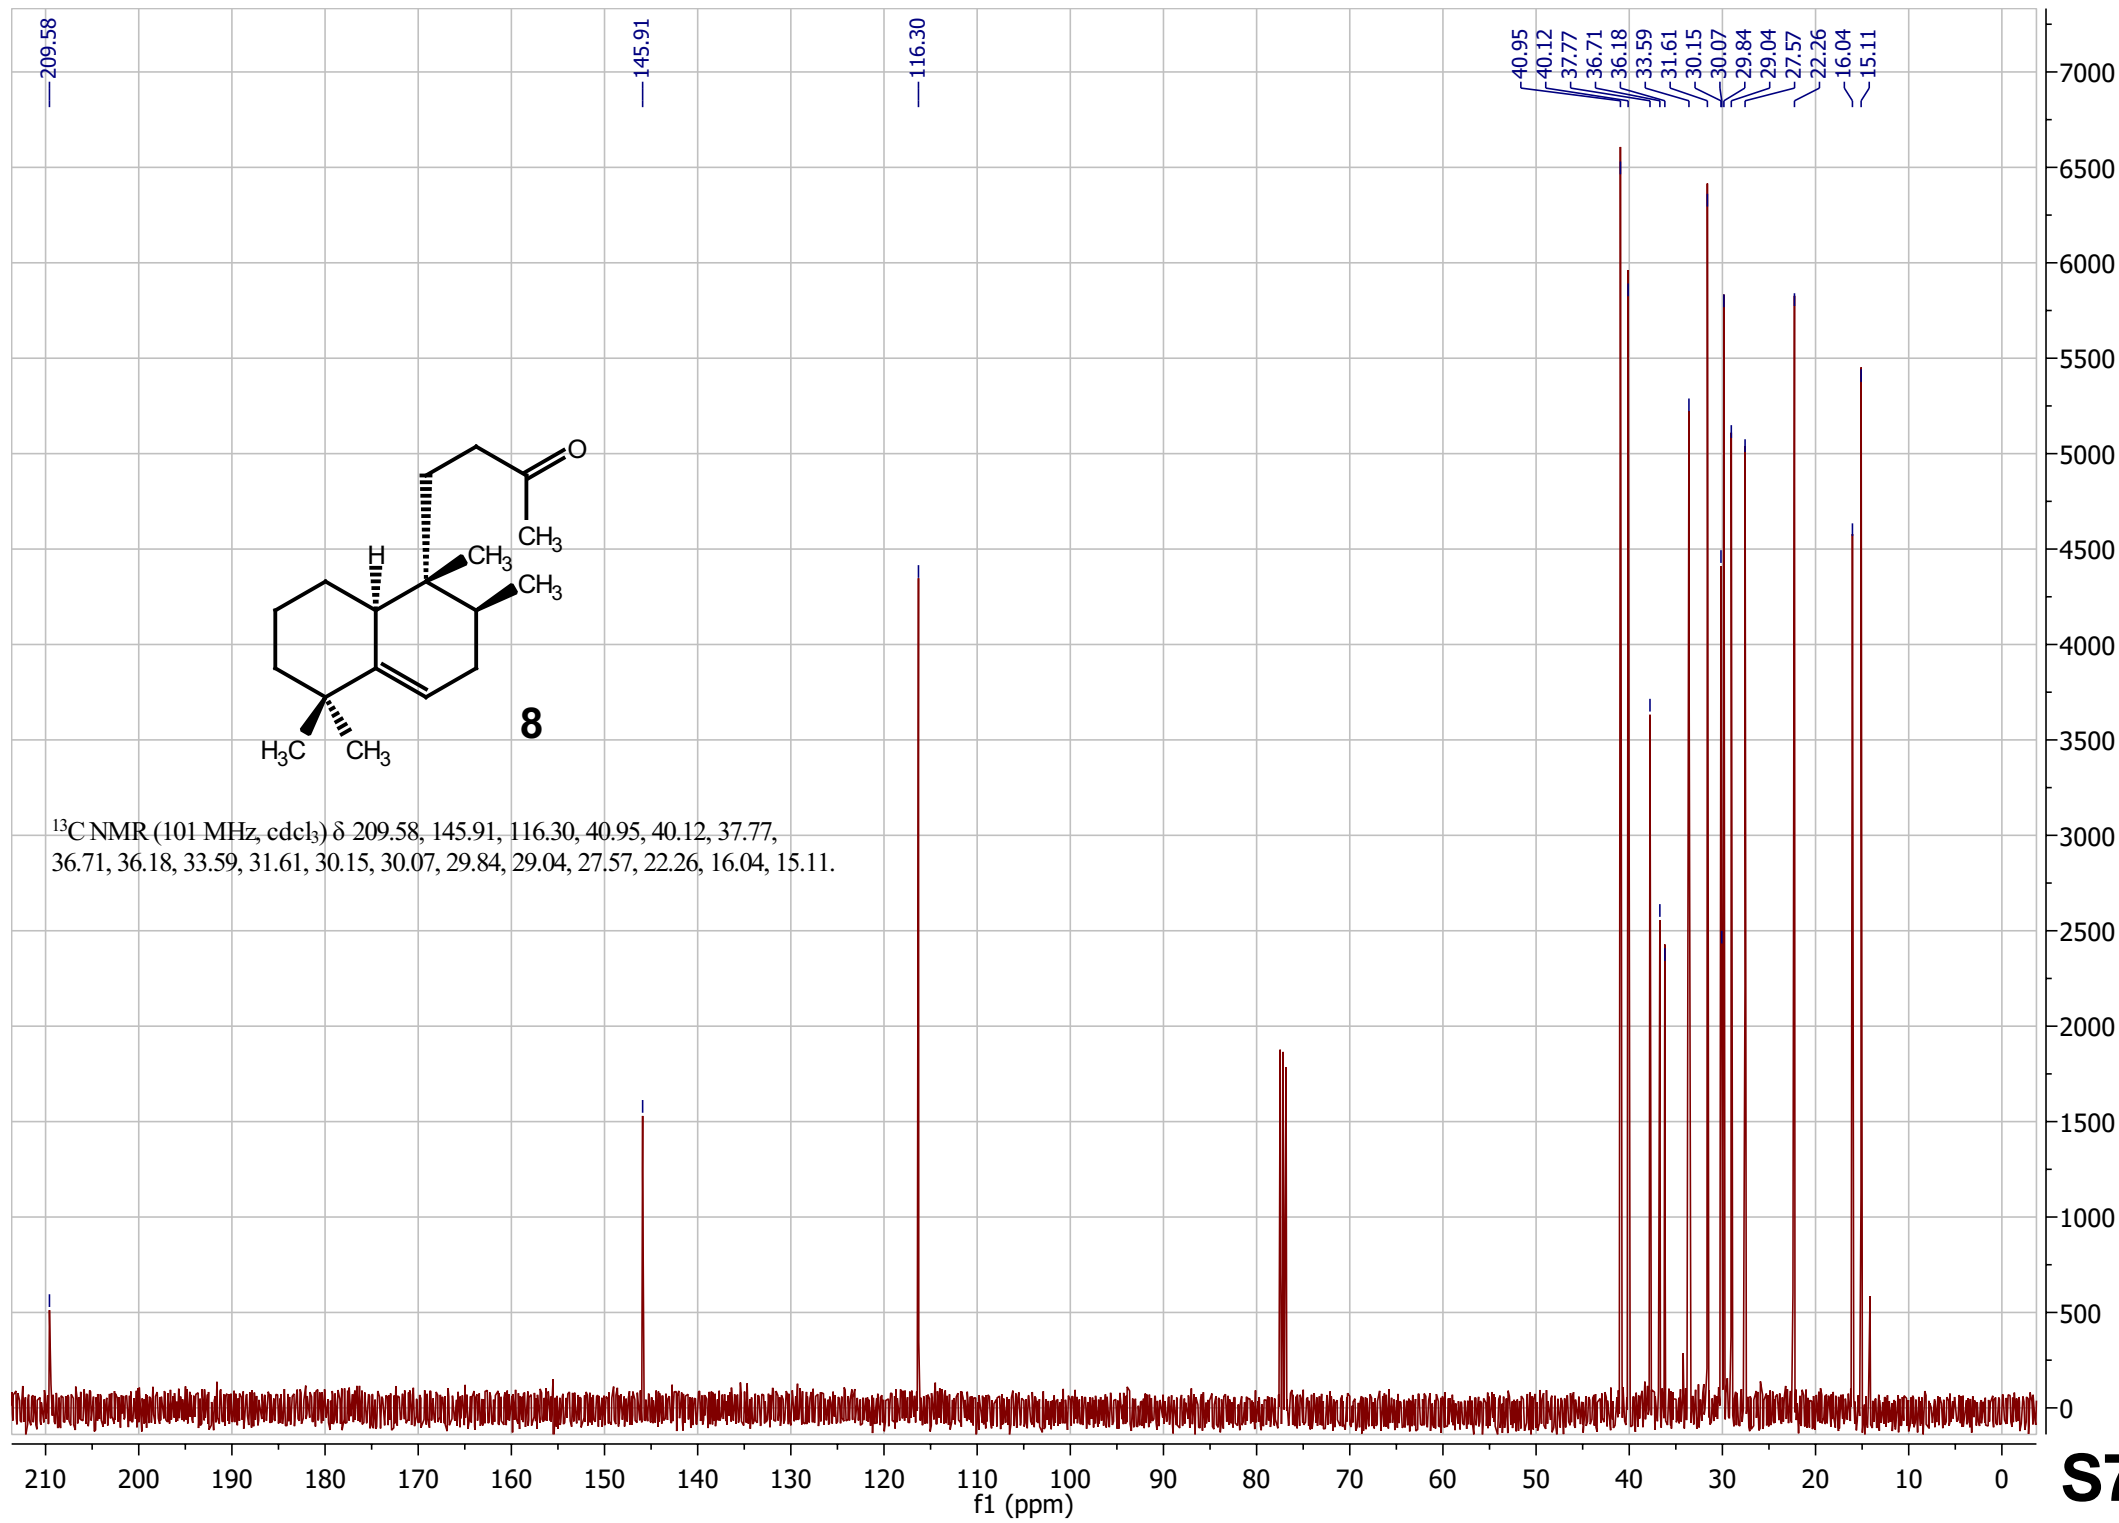

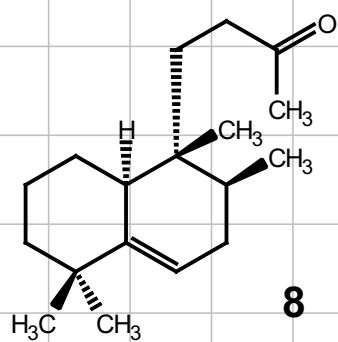

$^{13}\text{C}$  NMR (101 MHz,  $\text{CDCl}_3$ )  $\delta$  209.61, 145.92, 116.31, 40.95, 40.13, 37.78, 36.72, 36.19, 33.60, 31.62, 30.16, 30.08, 29.85, 29.06, 27.57, 22.27, 16.05, 15.14.

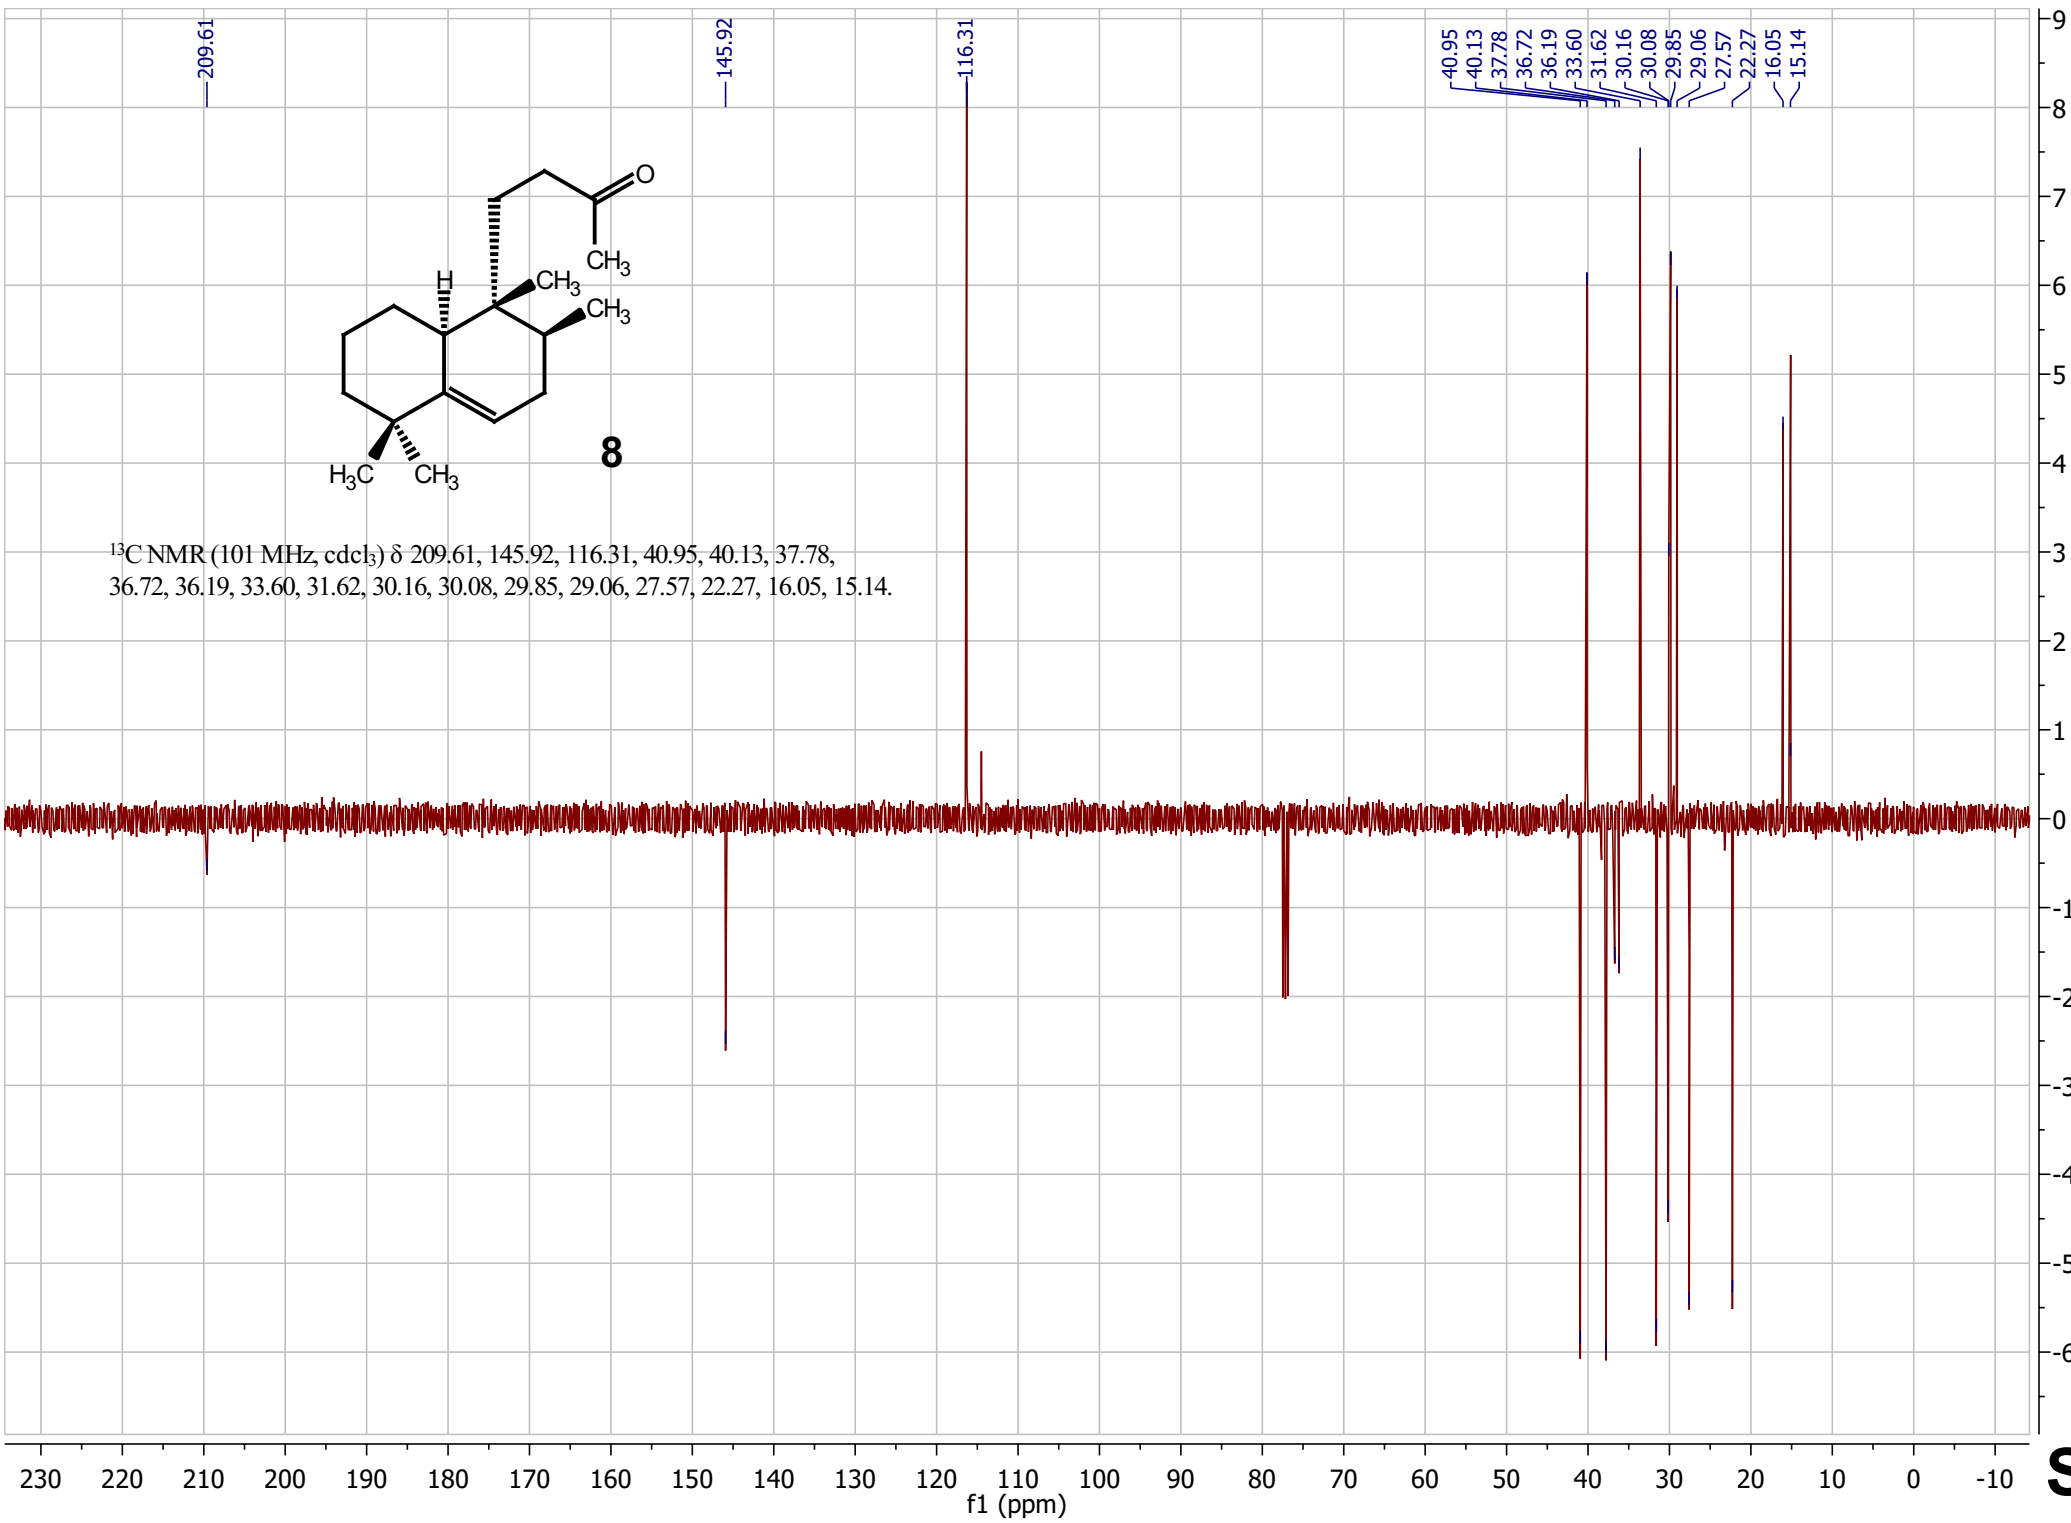

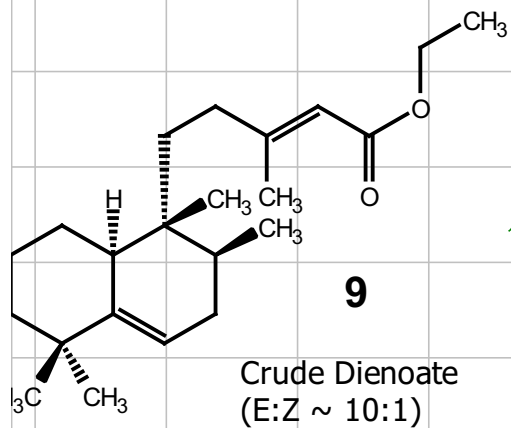

$^1\text{H}$  NMR (400 MHz, Chloroform-*d*)  
 $\delta$  5.67 (s, 1H), 5.45 – 5.40 (m, 1H),  
 4.13 (q,  $J = 7.1$  Hz, 2H), 2.17 (s,  
 3H), 2.13 (d,  $J = 13.1$  Hz, 1H), 2.03  
 (dt,  $J = 10.1, 4.4$  Hz, 2H), 1.90 –  
 1.67 (m, 4H), 1.65 – 1.44 (m, 5H),  
 1.44 – 1.34 (m, 2H), 1.26 (d,  $J = 6.9$   
 Hz, 2H), 1.22 – 1.14 (m, 1H), 1.05  
 (s, 3H), 0.99 (s, 3H), 0.81 (d,  $J =$   
 6.7 Hz, 3H), 0.63 (s, 3H).

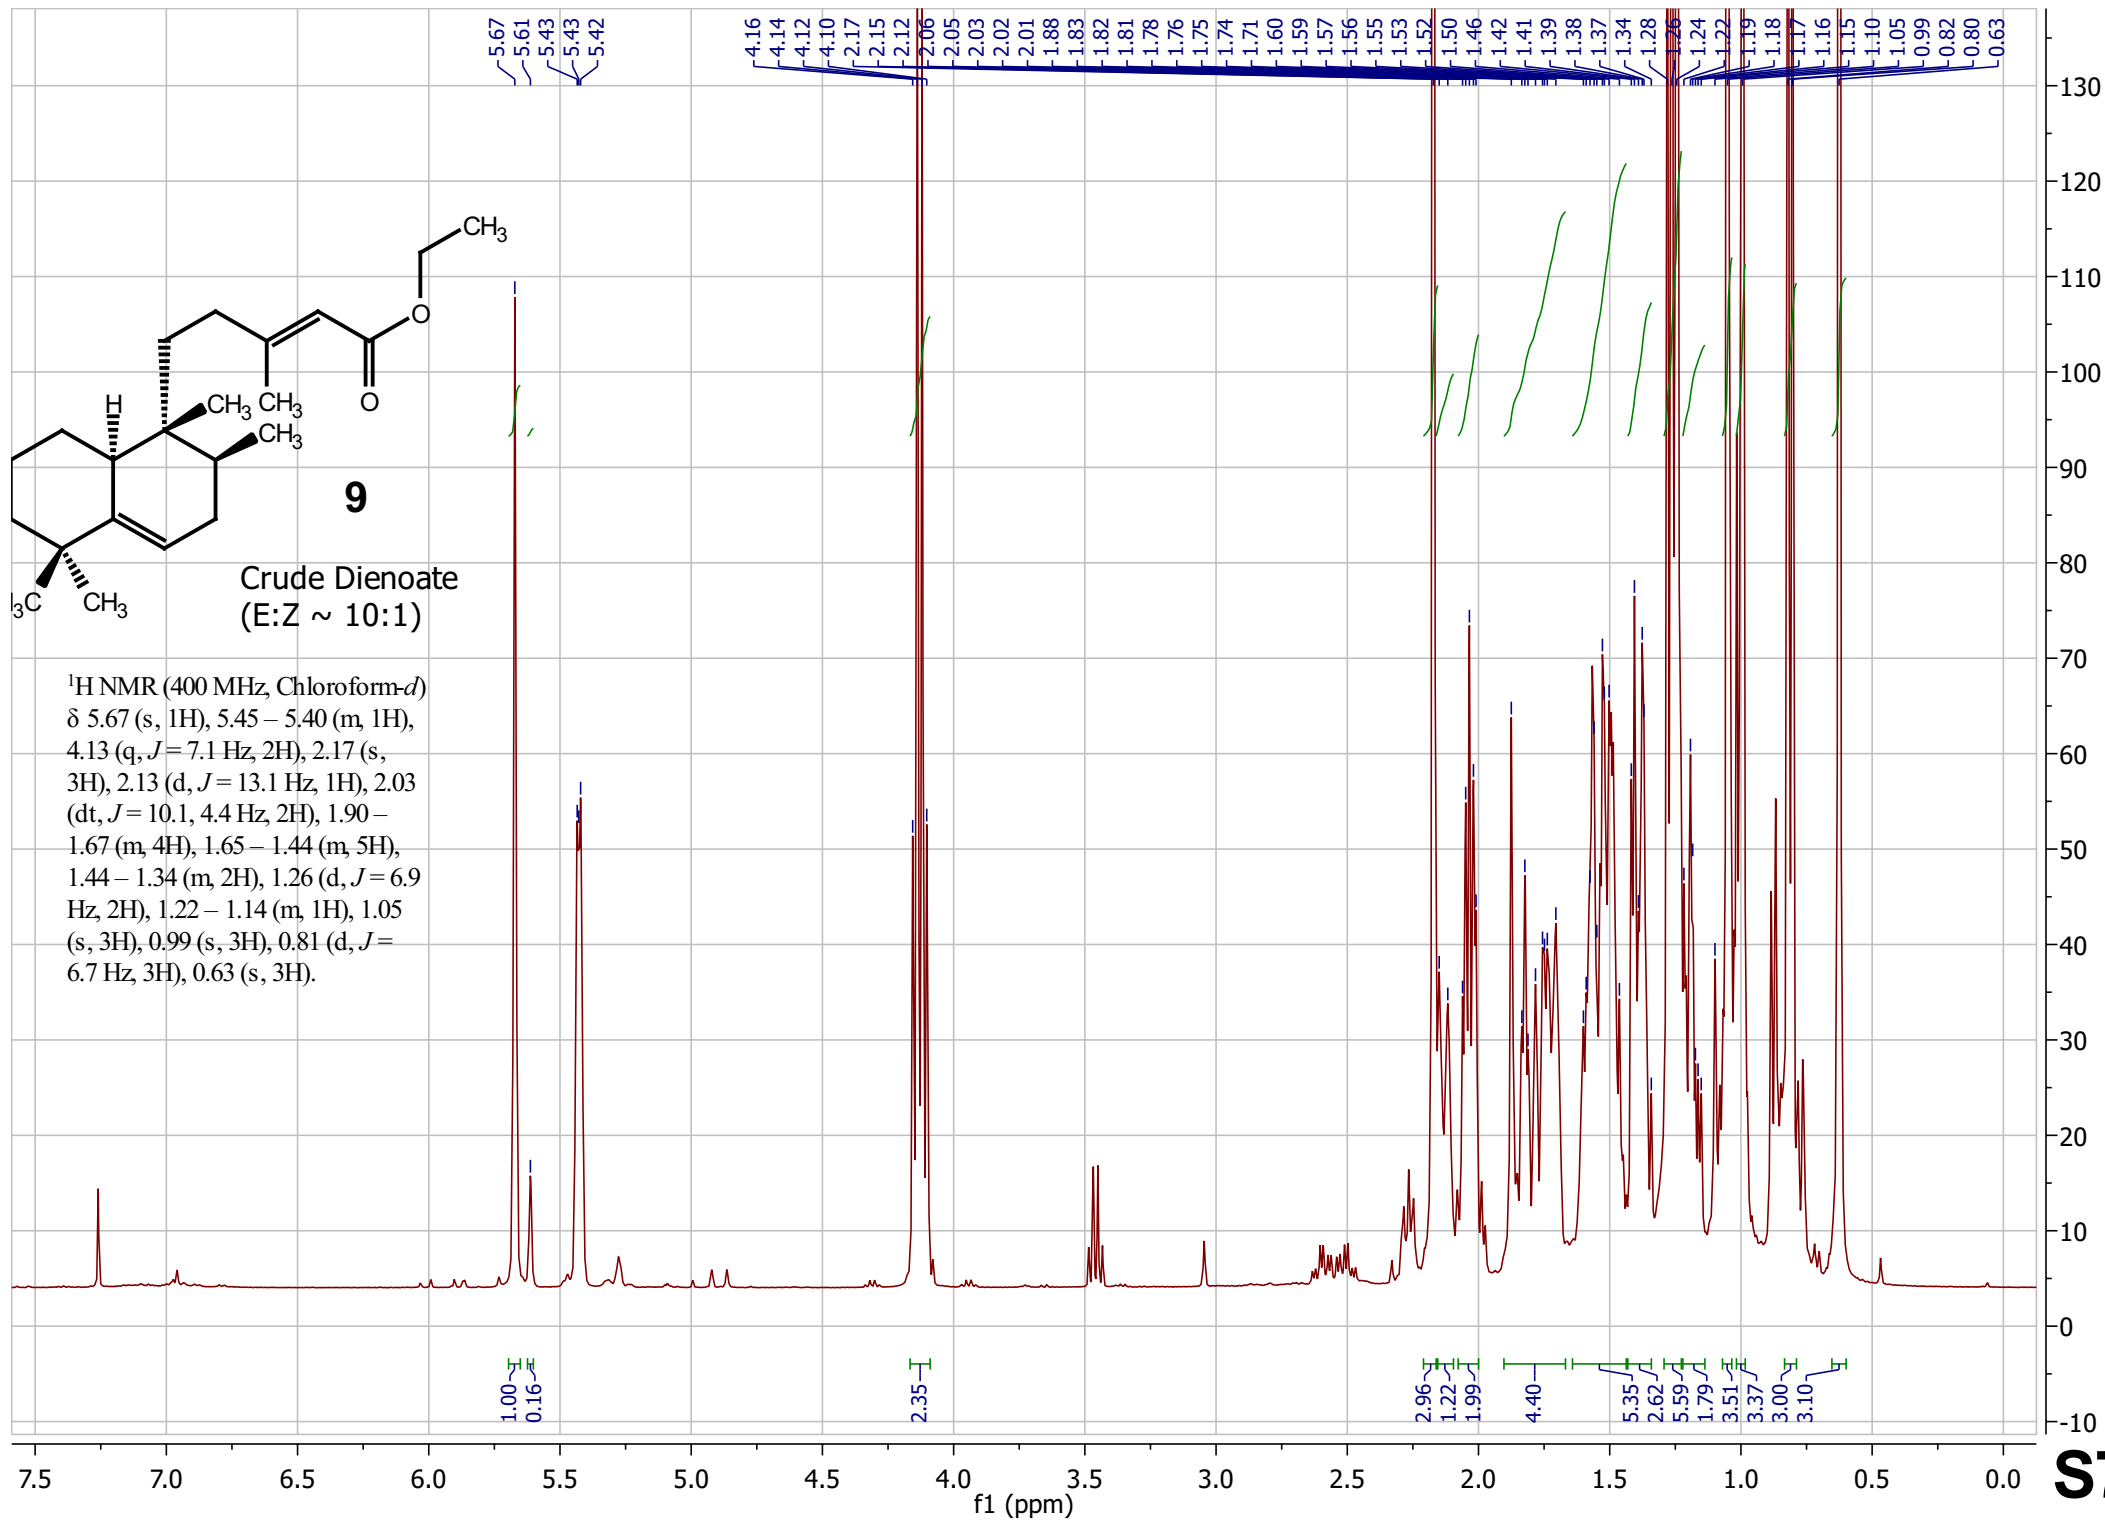



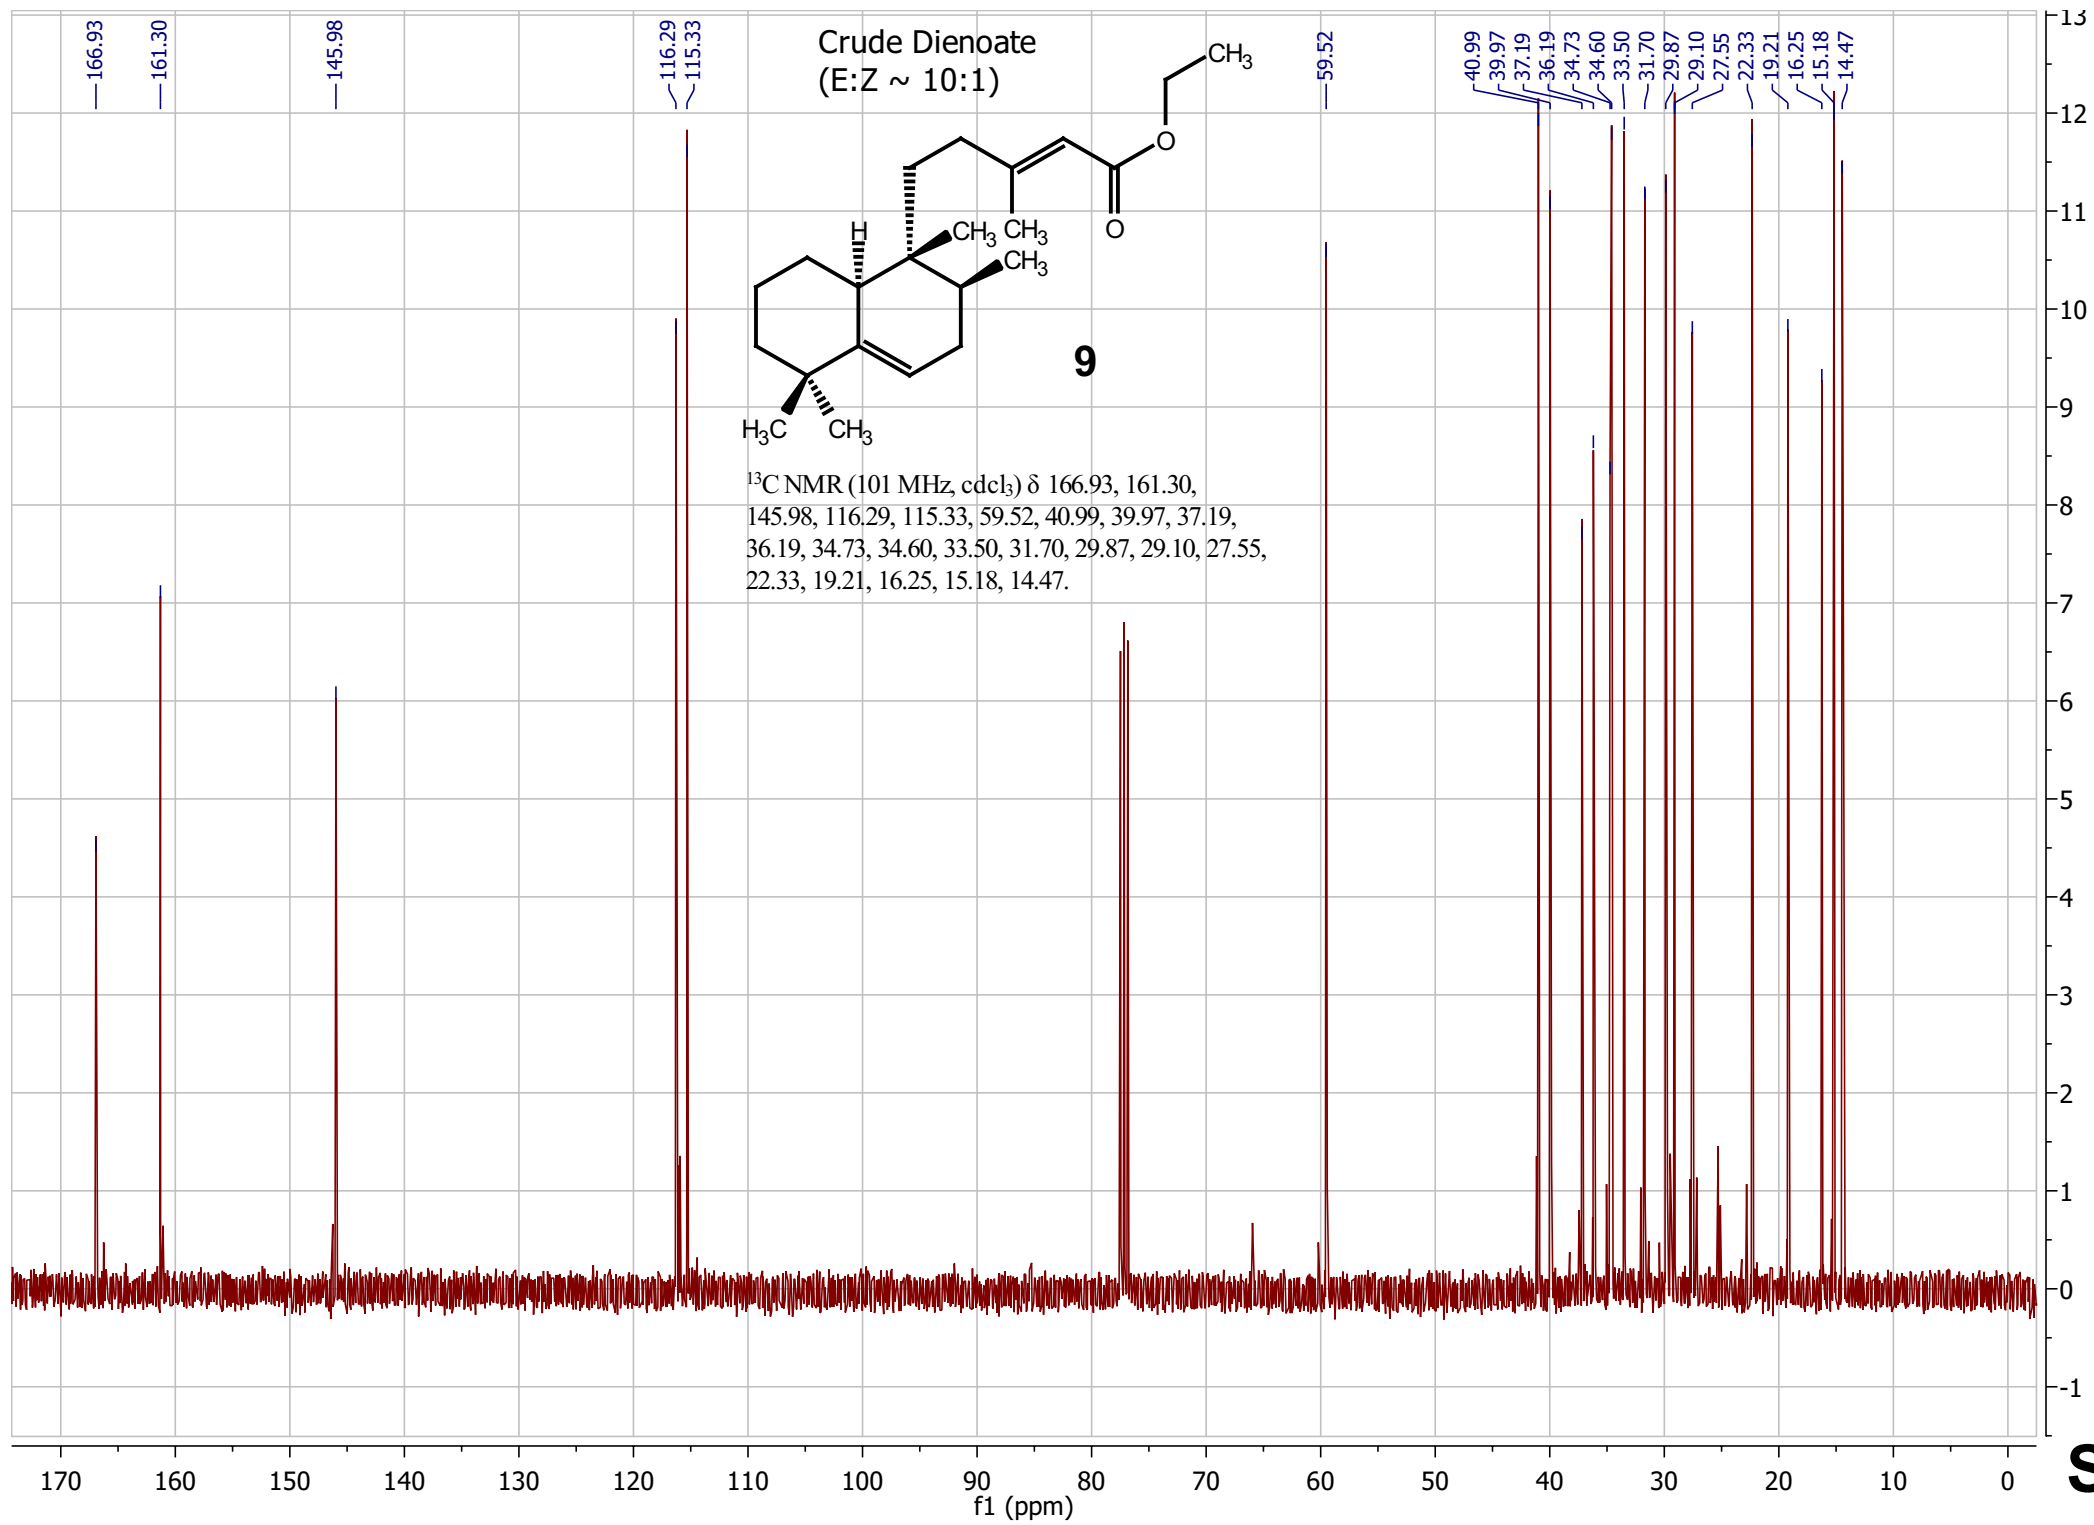

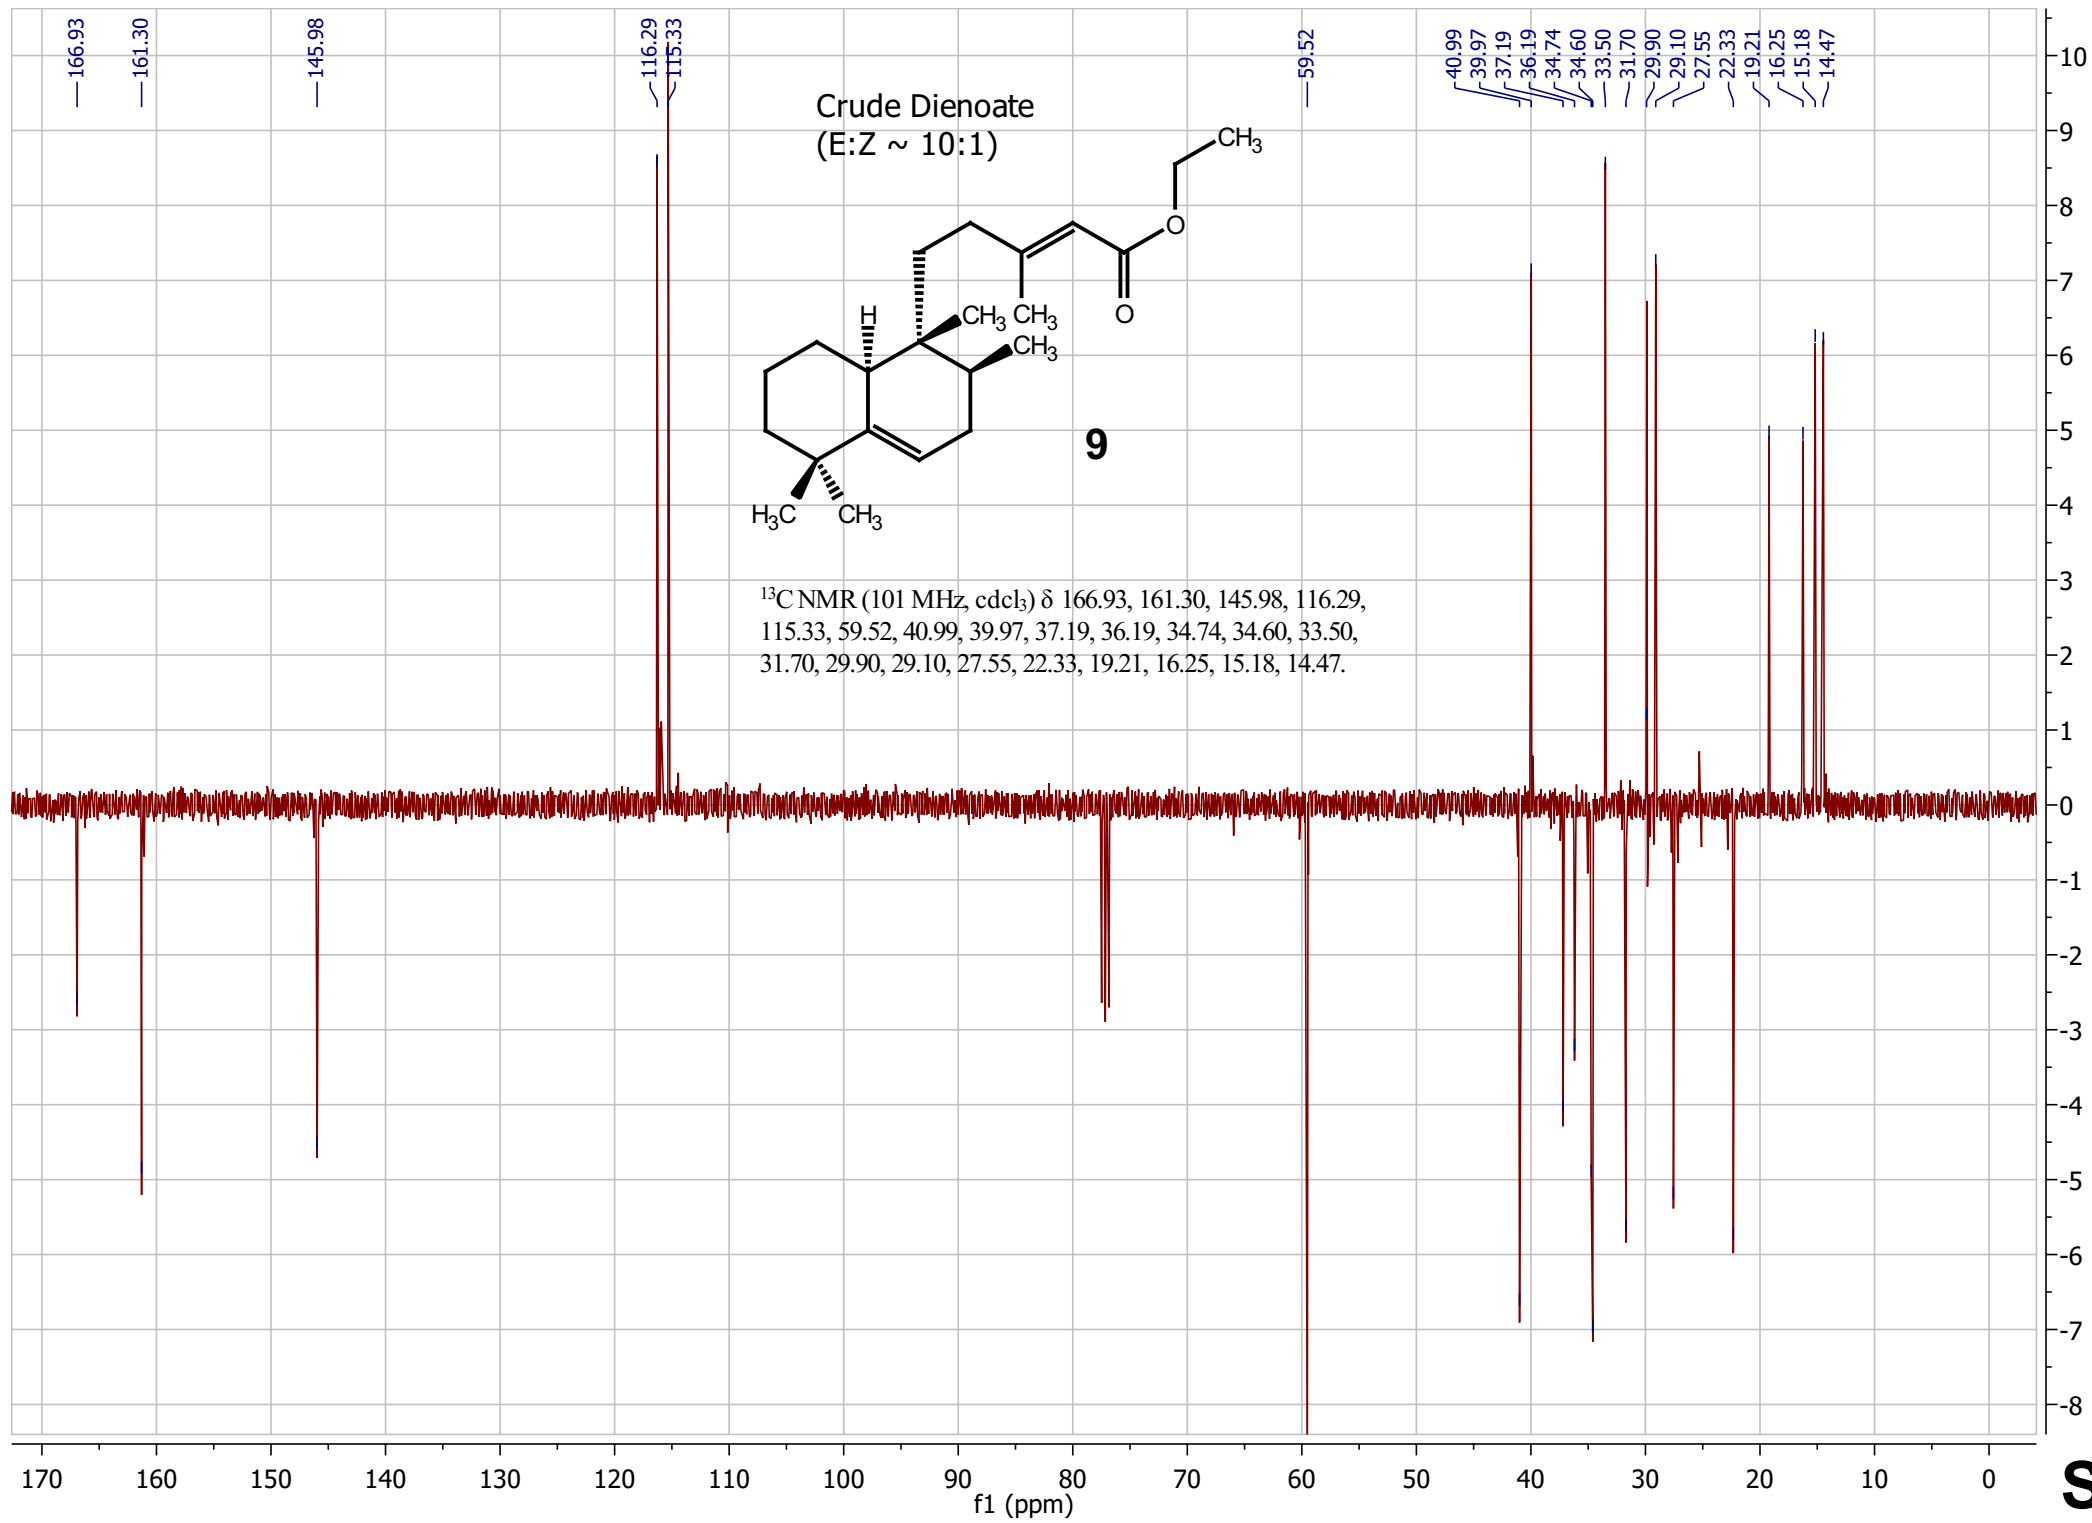

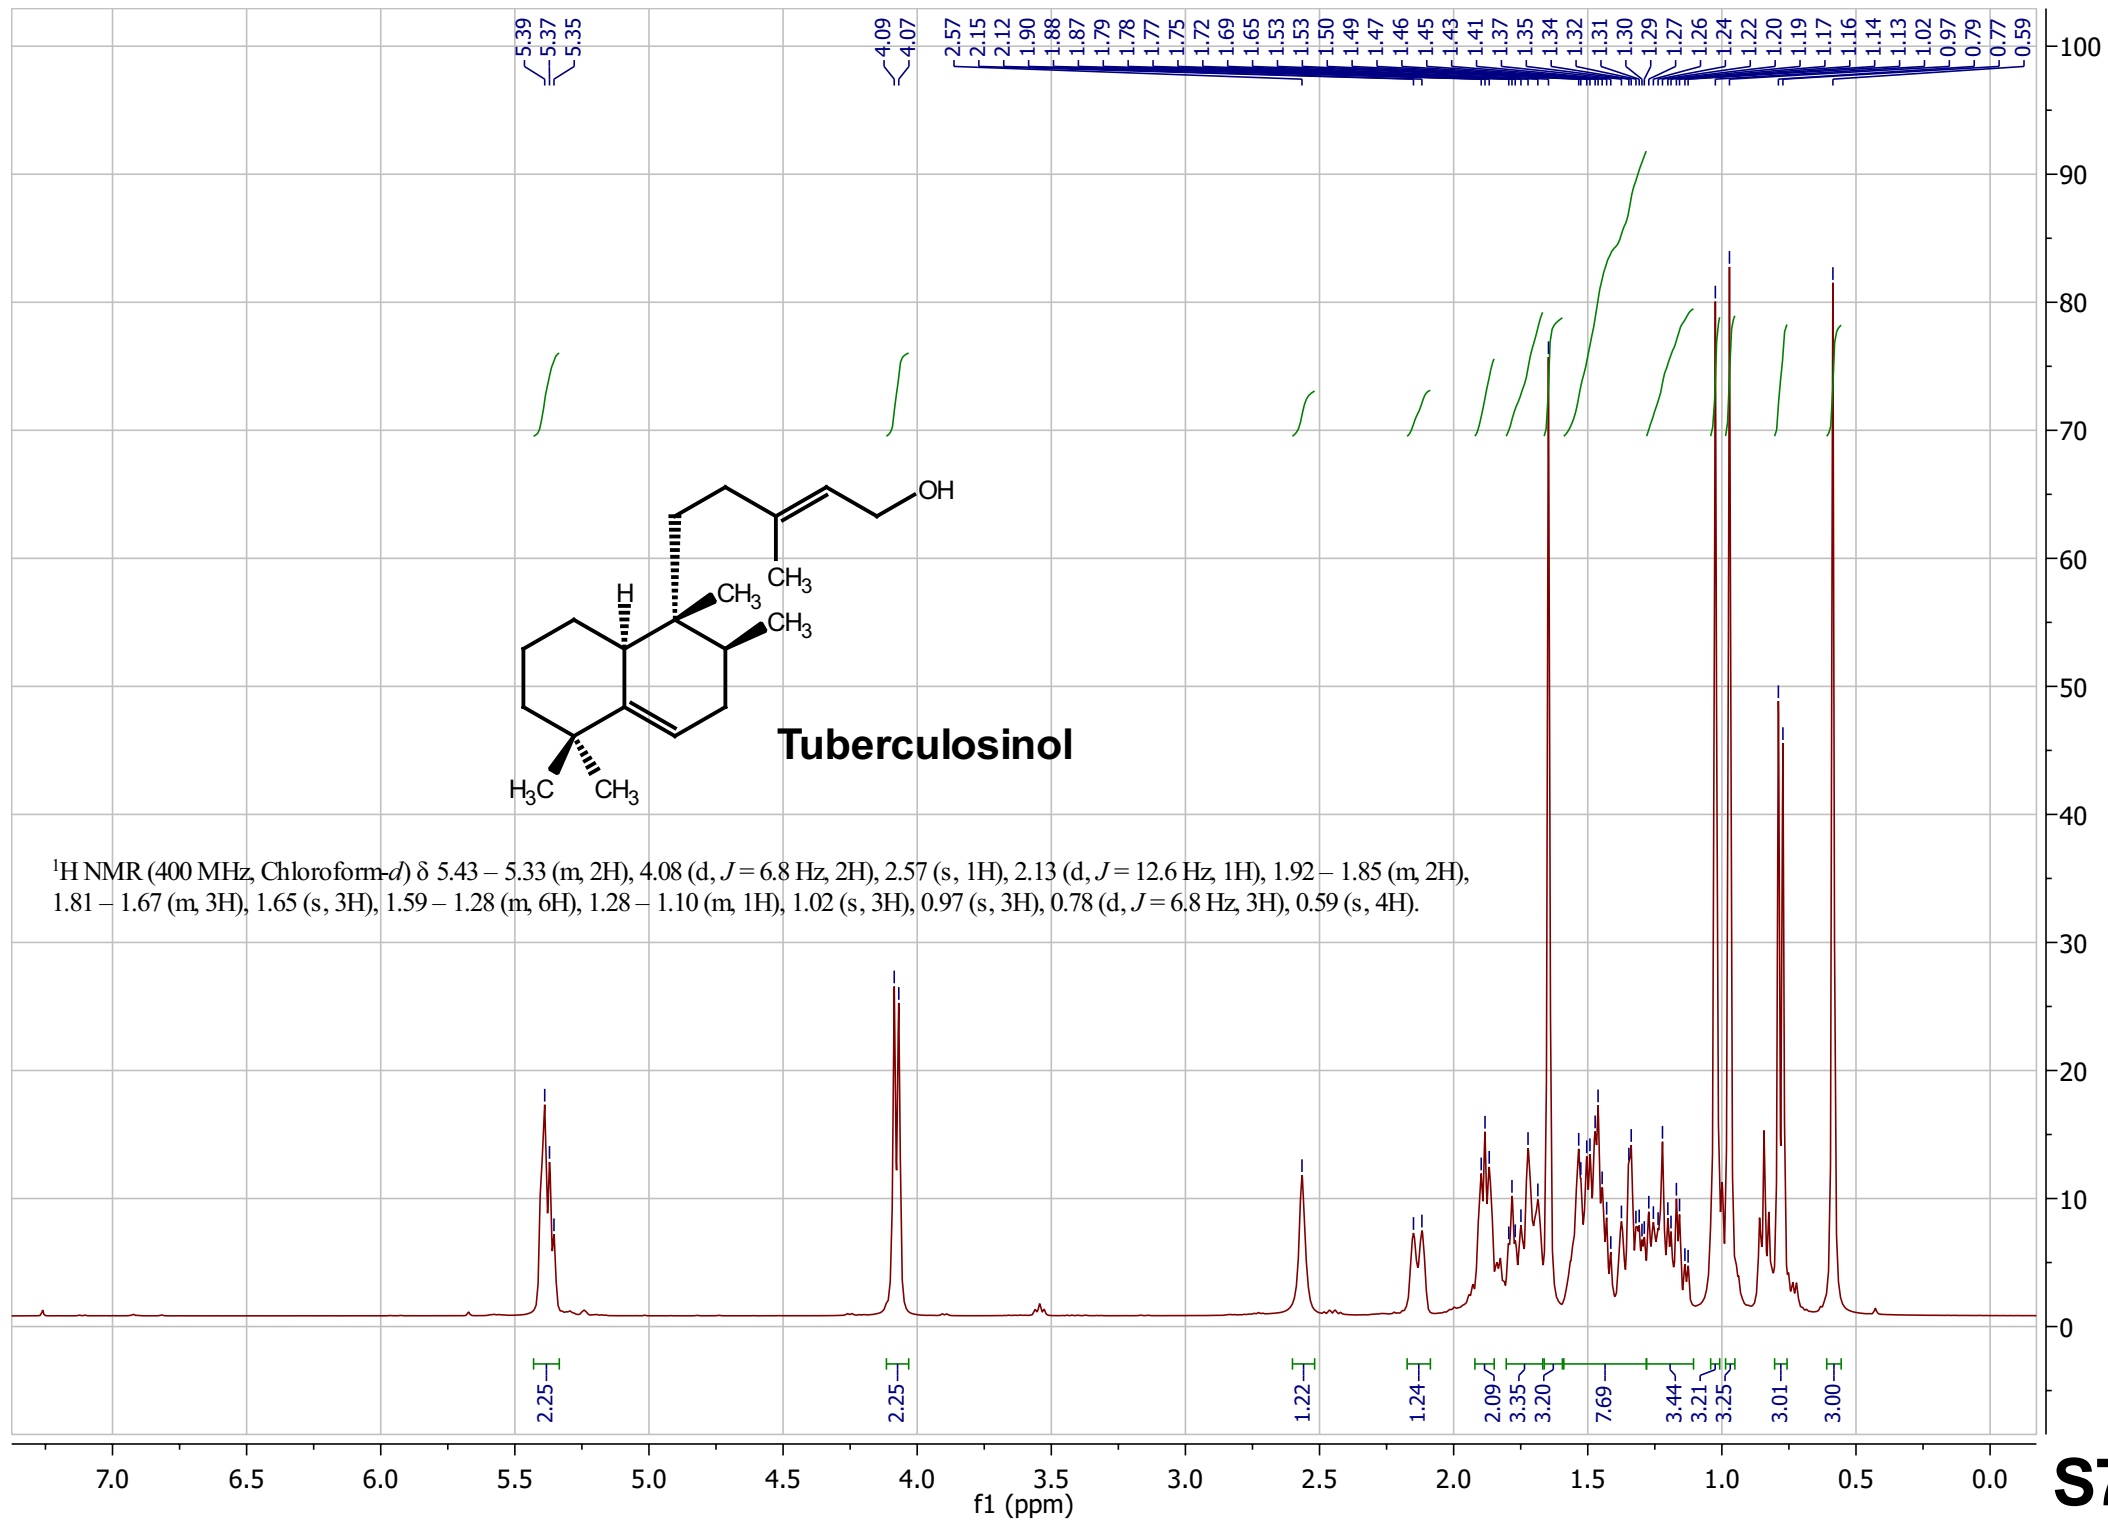

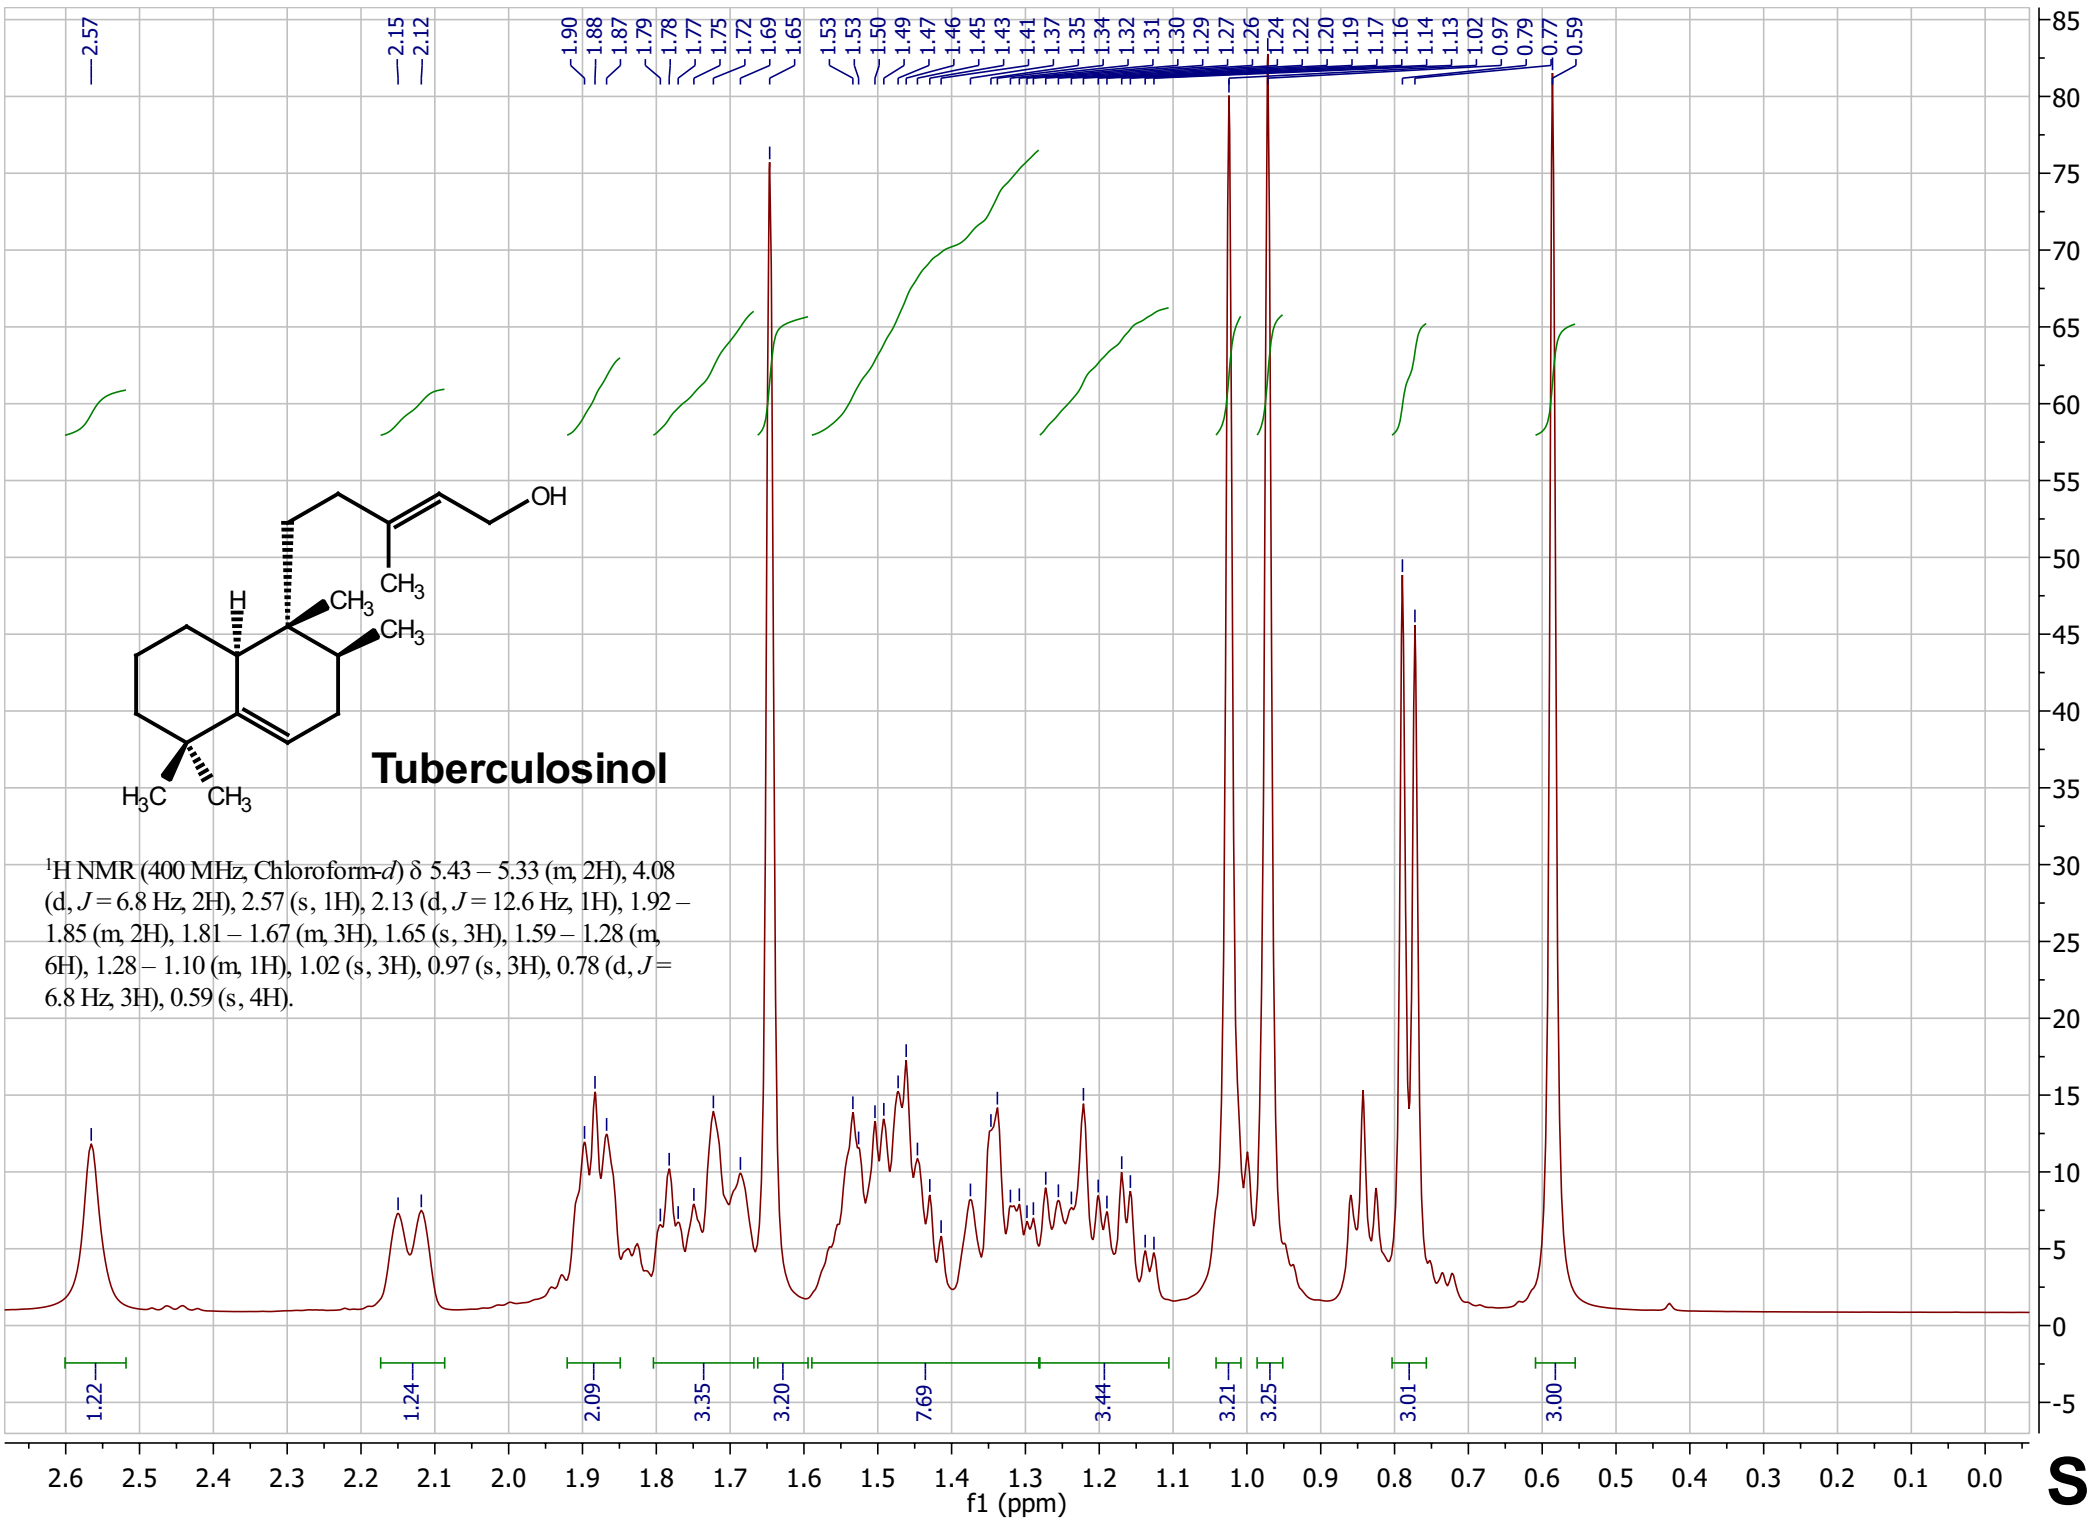

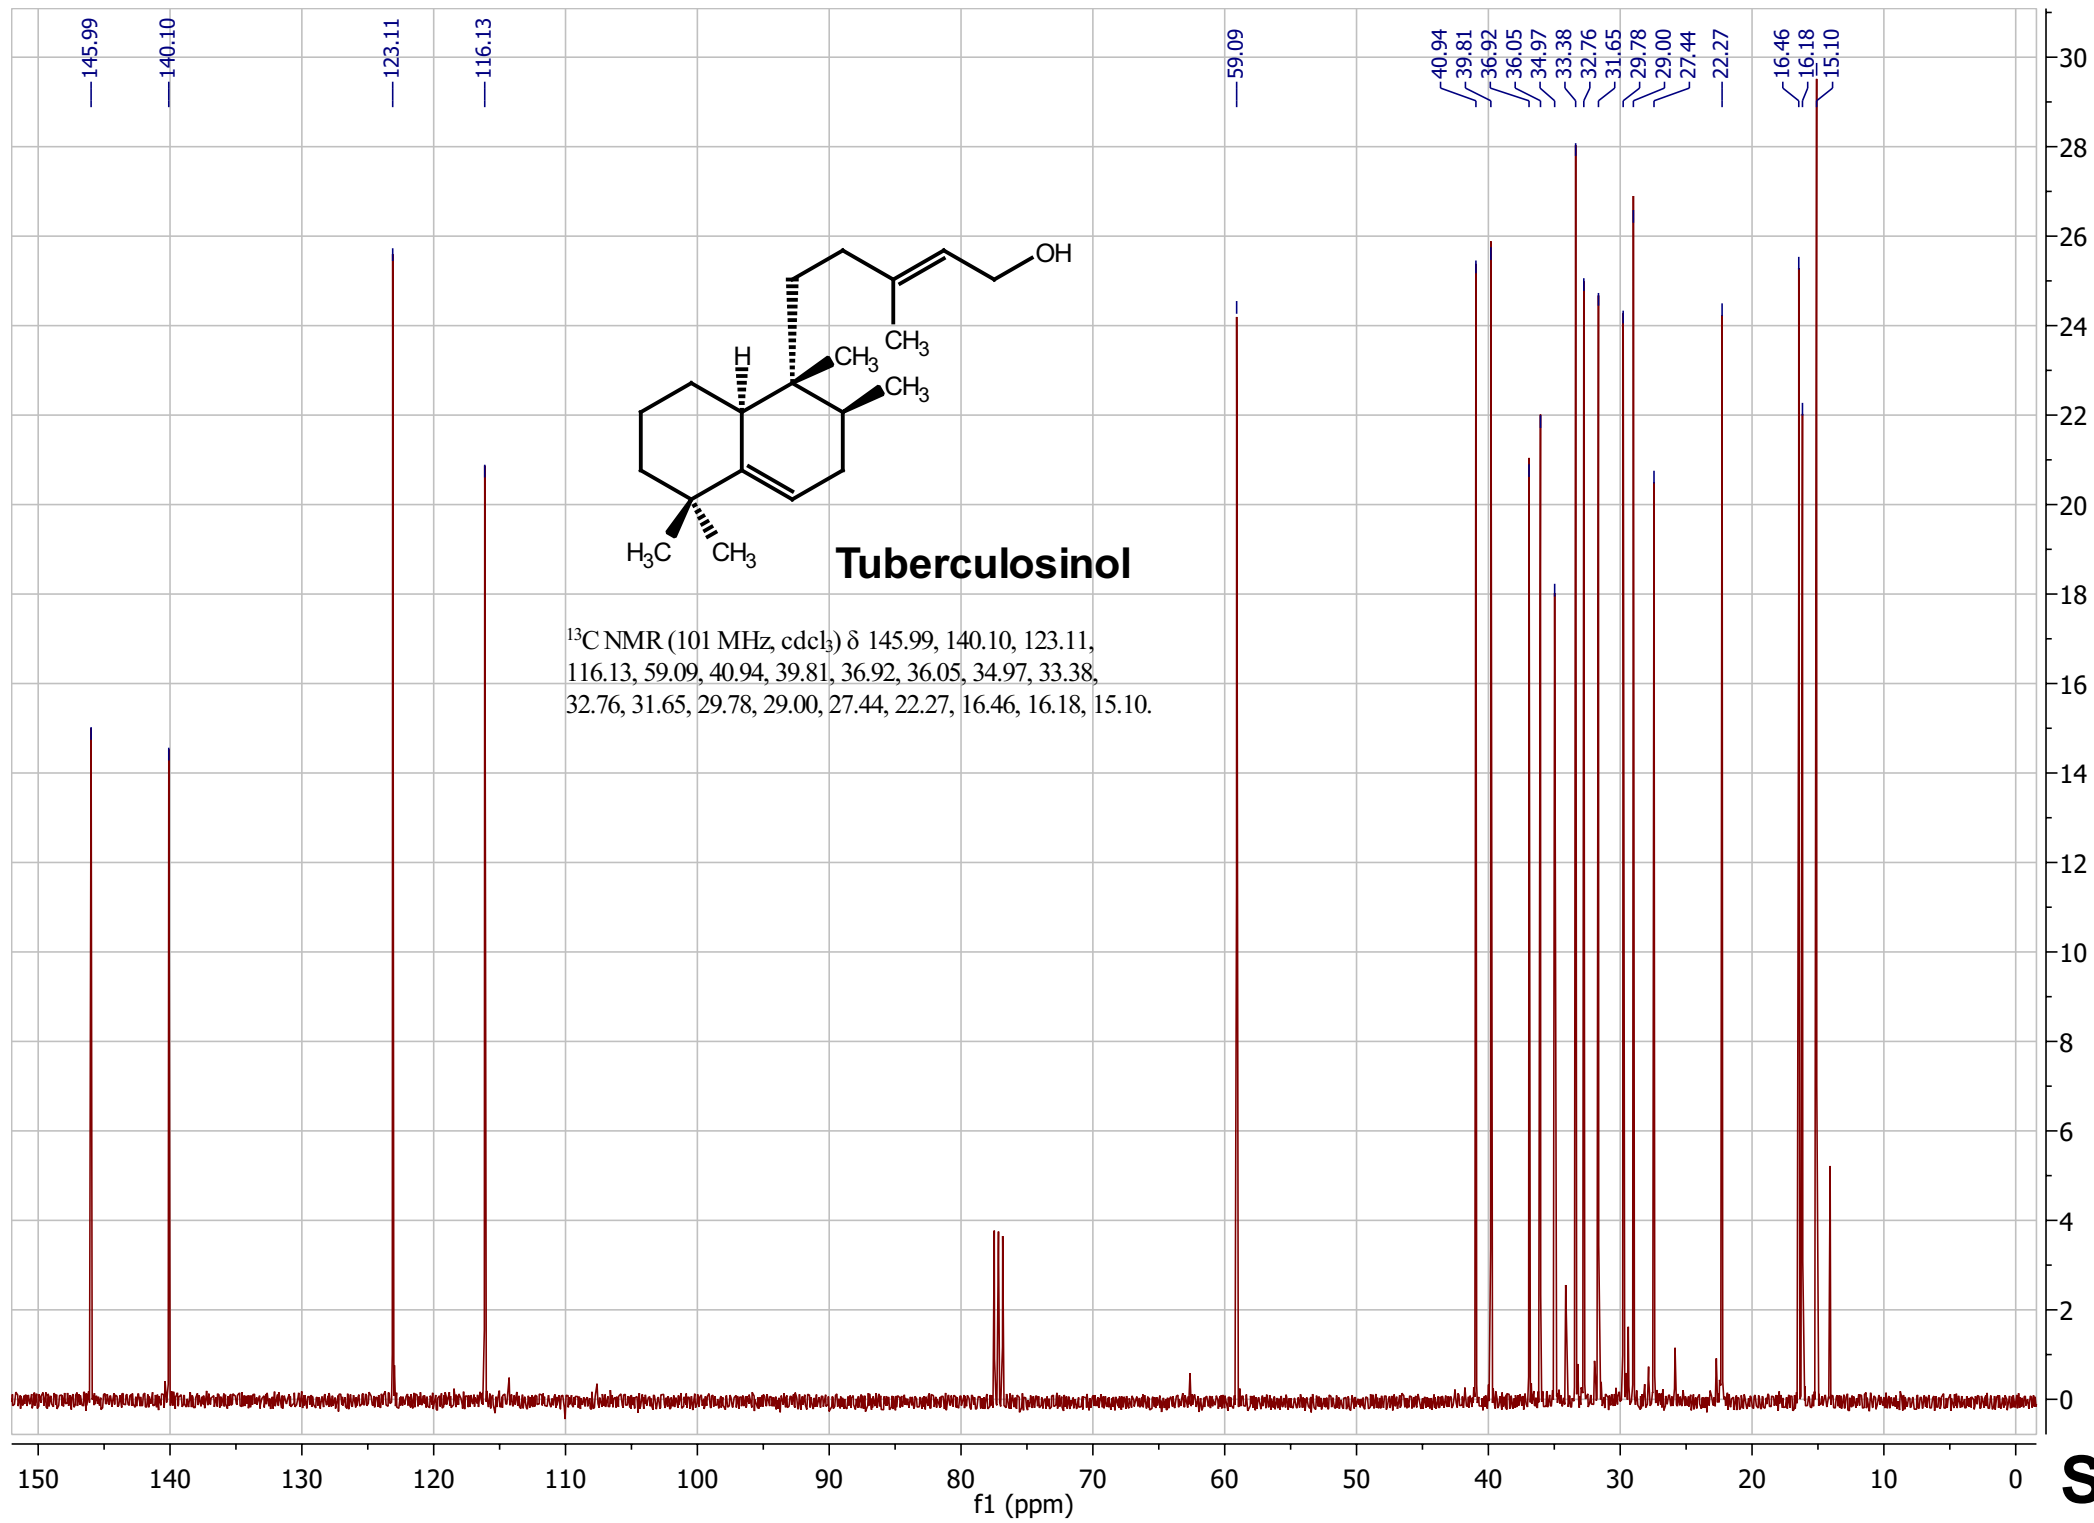

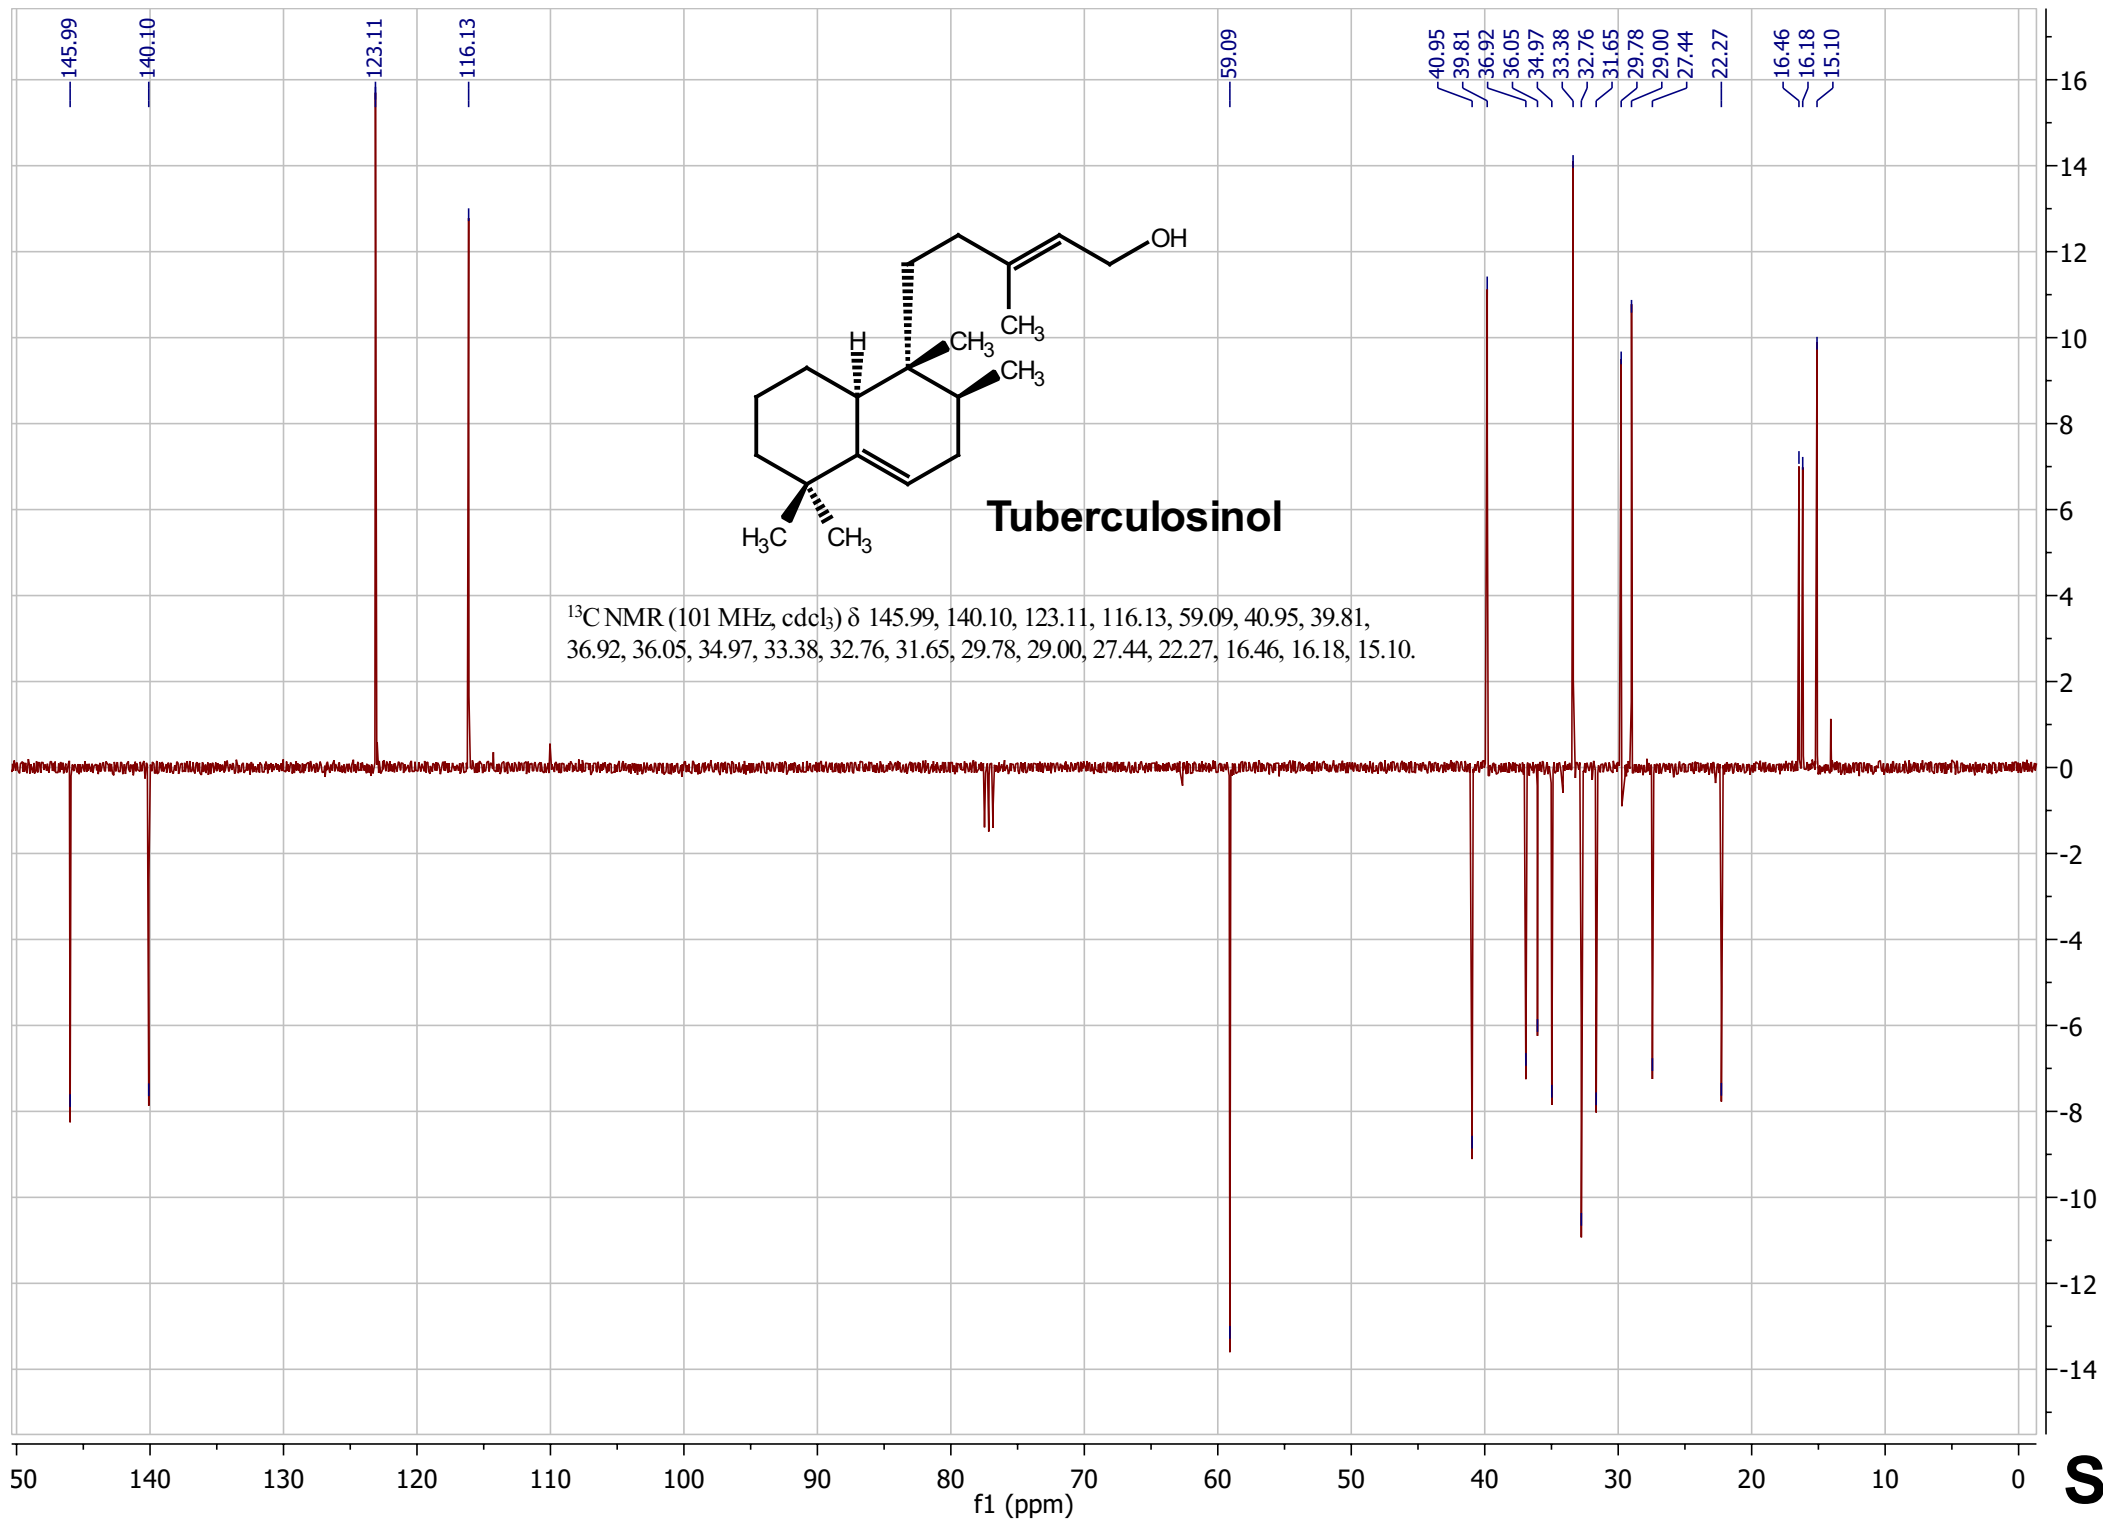

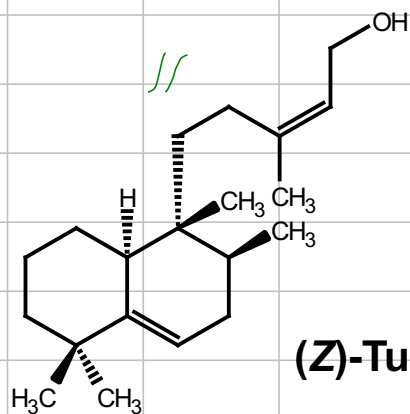

**(Z)-Tuberculosinol**

$^1\text{H NMR}$  (400 MHz, Chloroform-*d*)  $\delta$  5.46 – 5.42 (m, 1H), 5.39 (t,  $J = 6.9$  Hz, 1H), 4.13 (d,  $J = 7.0$  Hz, 2H), 2.21 (d,  $J = 13.2$  Hz, 1H), 1.99 (ddp,  $J = 17.4, 12.6, 5.3$  Hz, 3H), 1.91 – 1.79 (m, 1H), 1.76 (s, 3H), 1.67 – 1.47 (m, 4H), 1.47 – 1.15 (m, 6H), 1.07 (s, 3H), 1.02 (s, 3H), 0.85 (d,  $J = 6.7$  Hz, 3H), 0.62 (s, 3H).

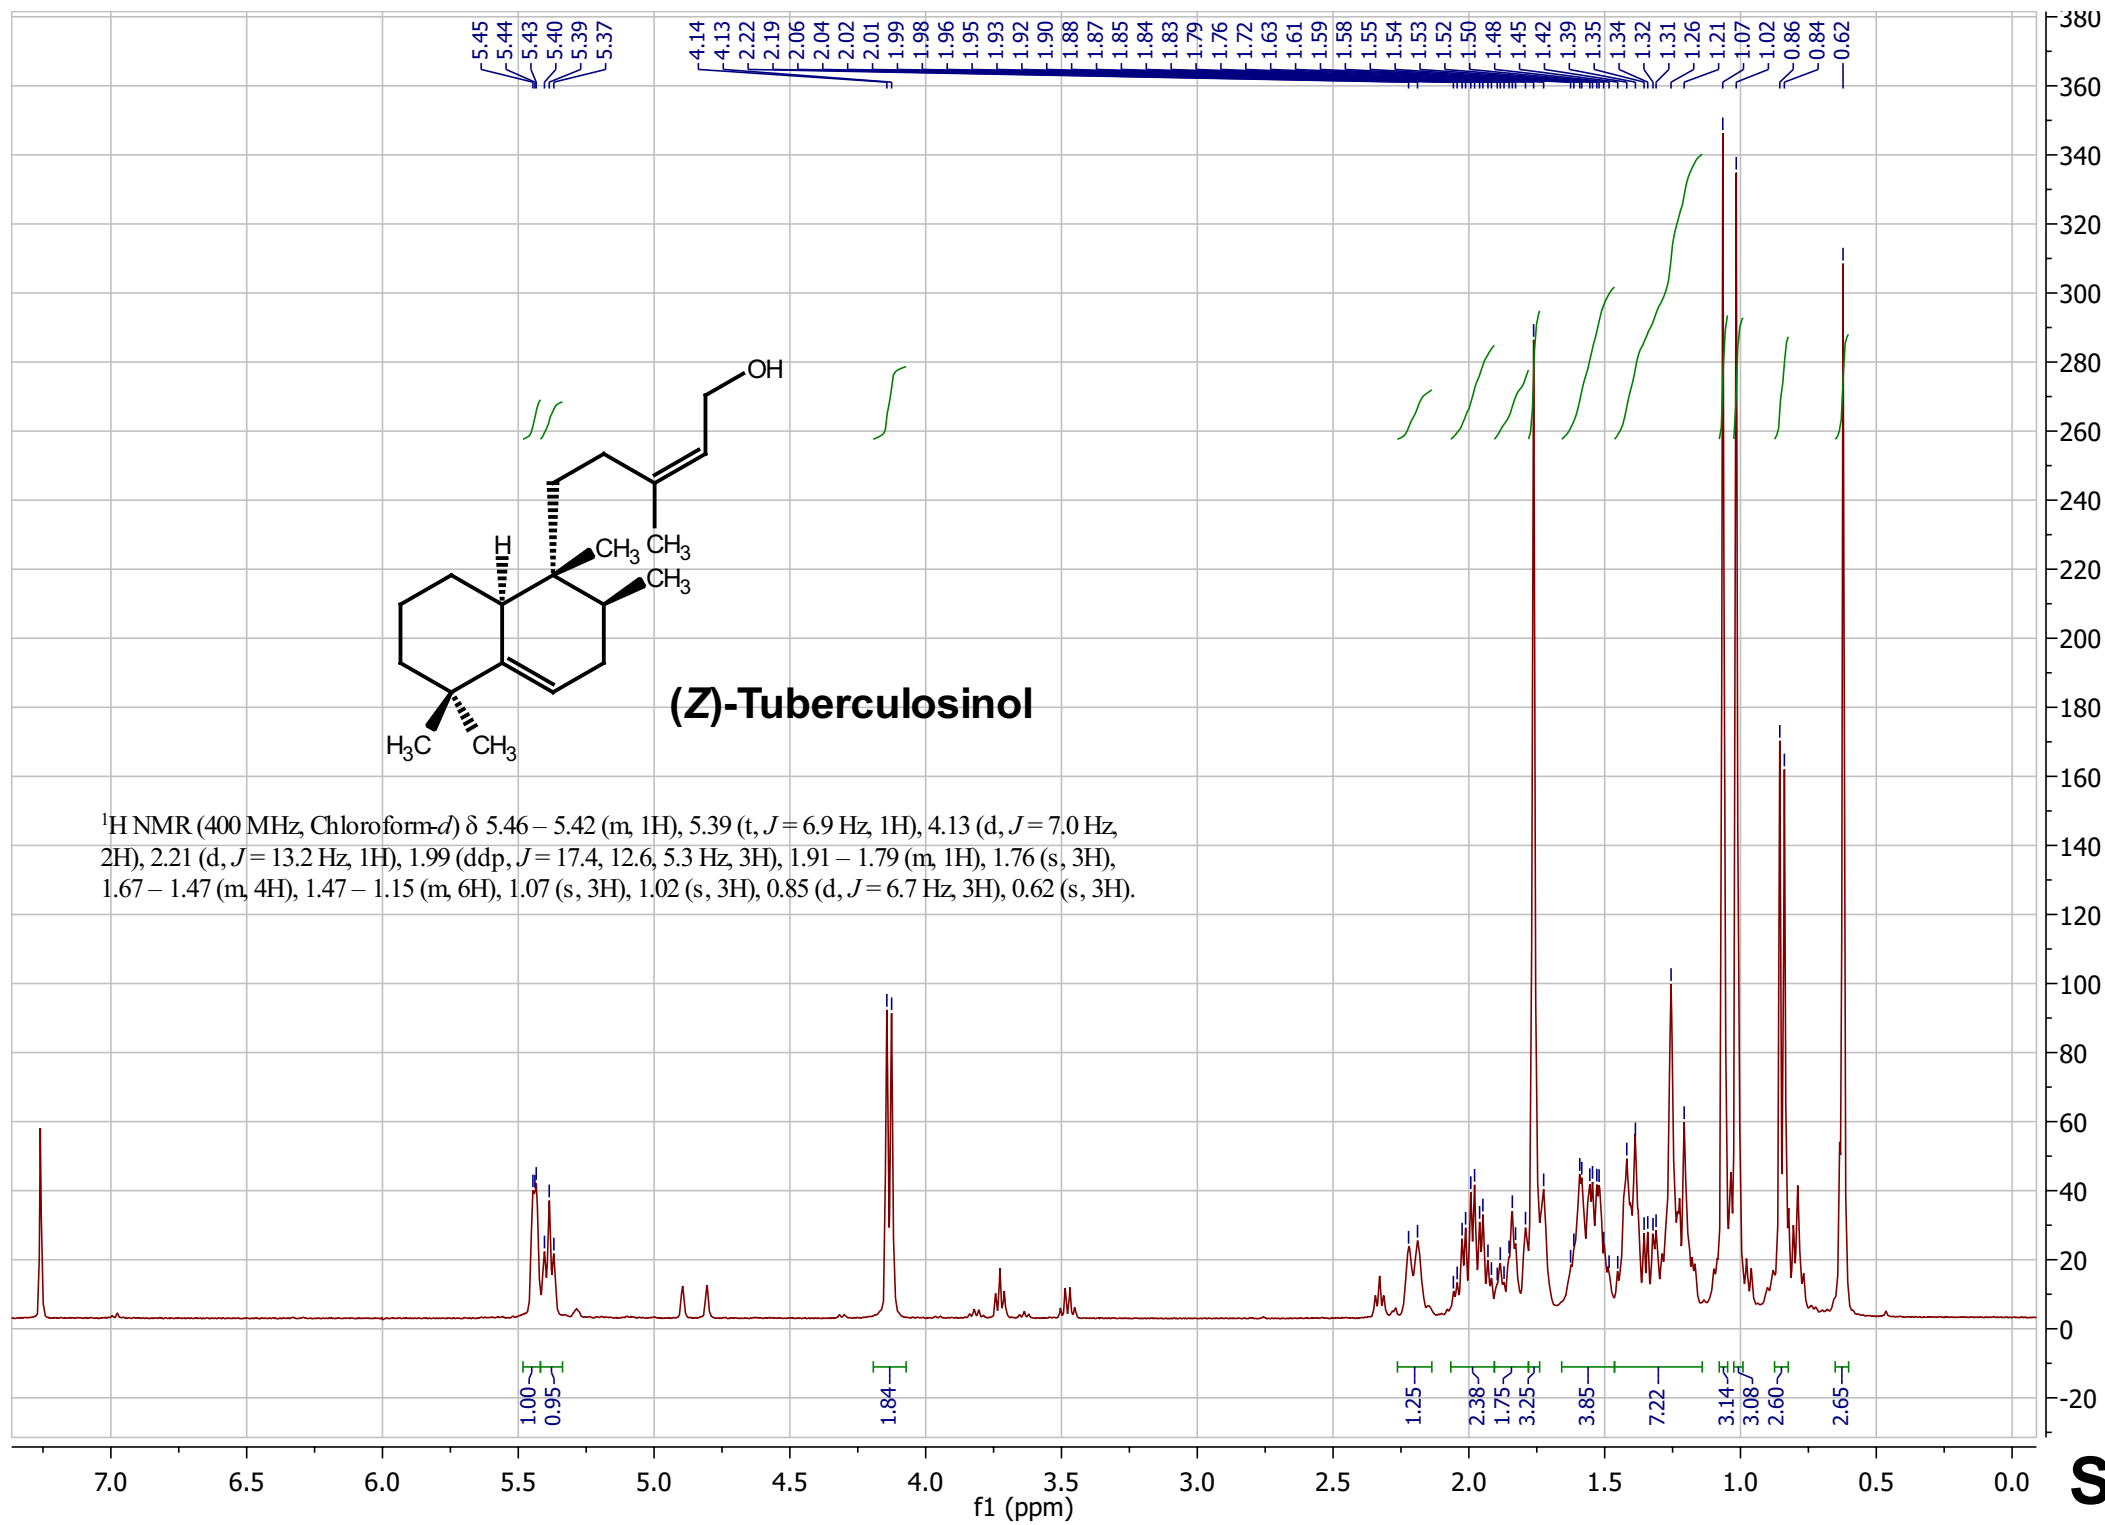

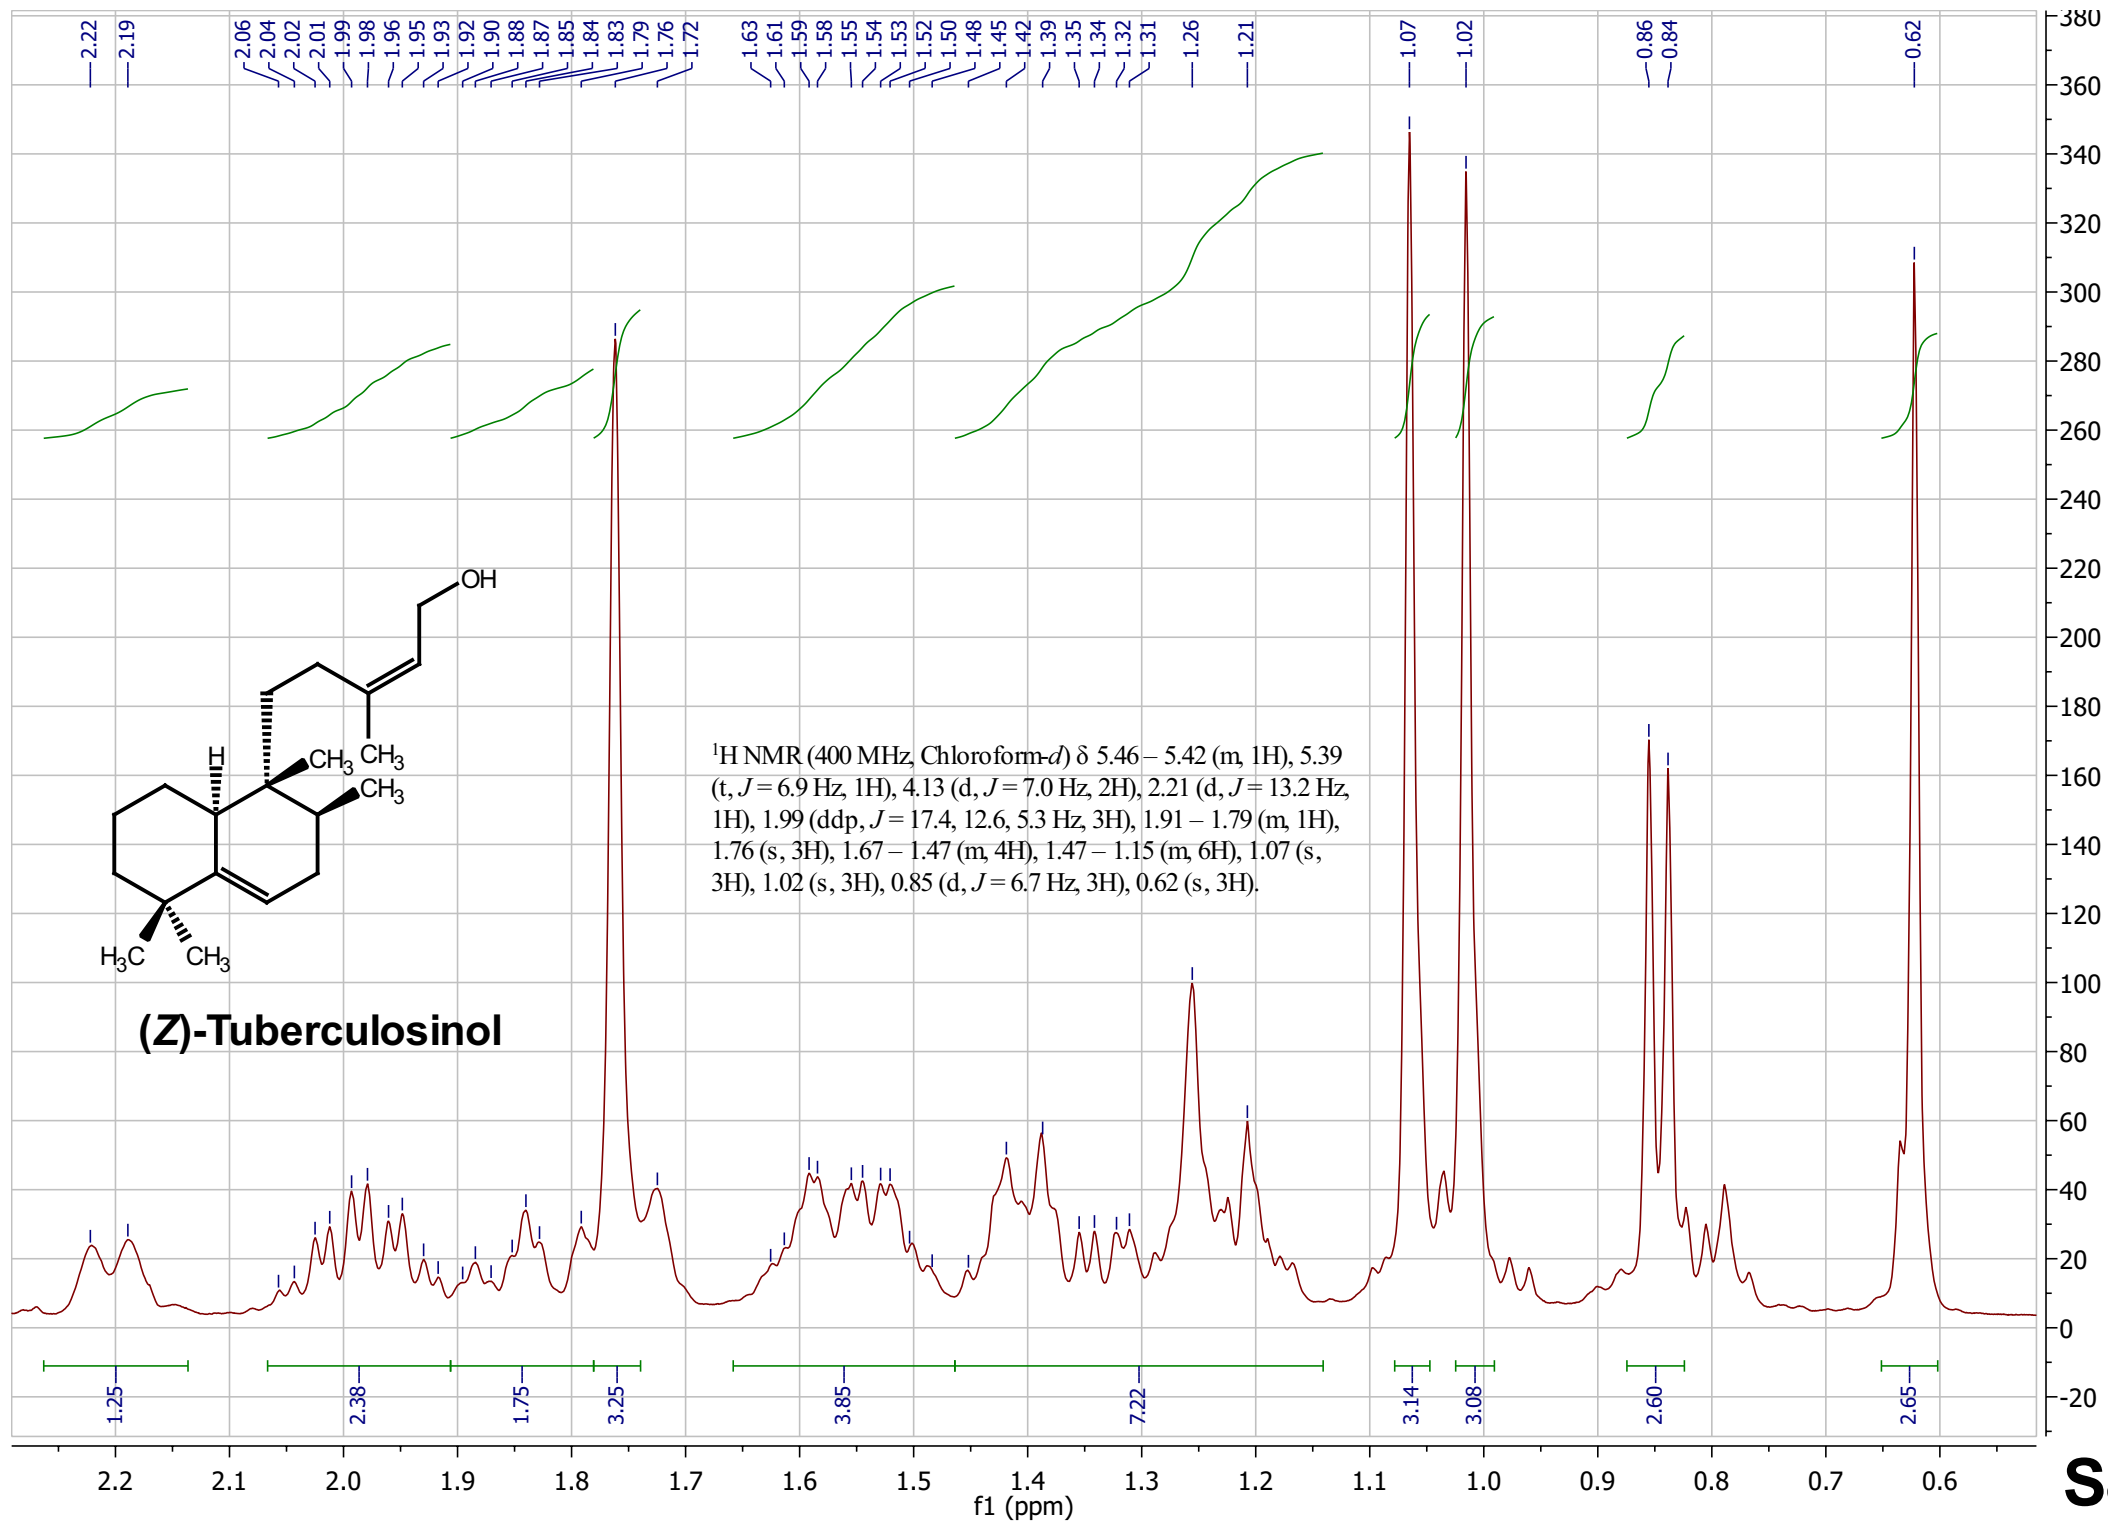



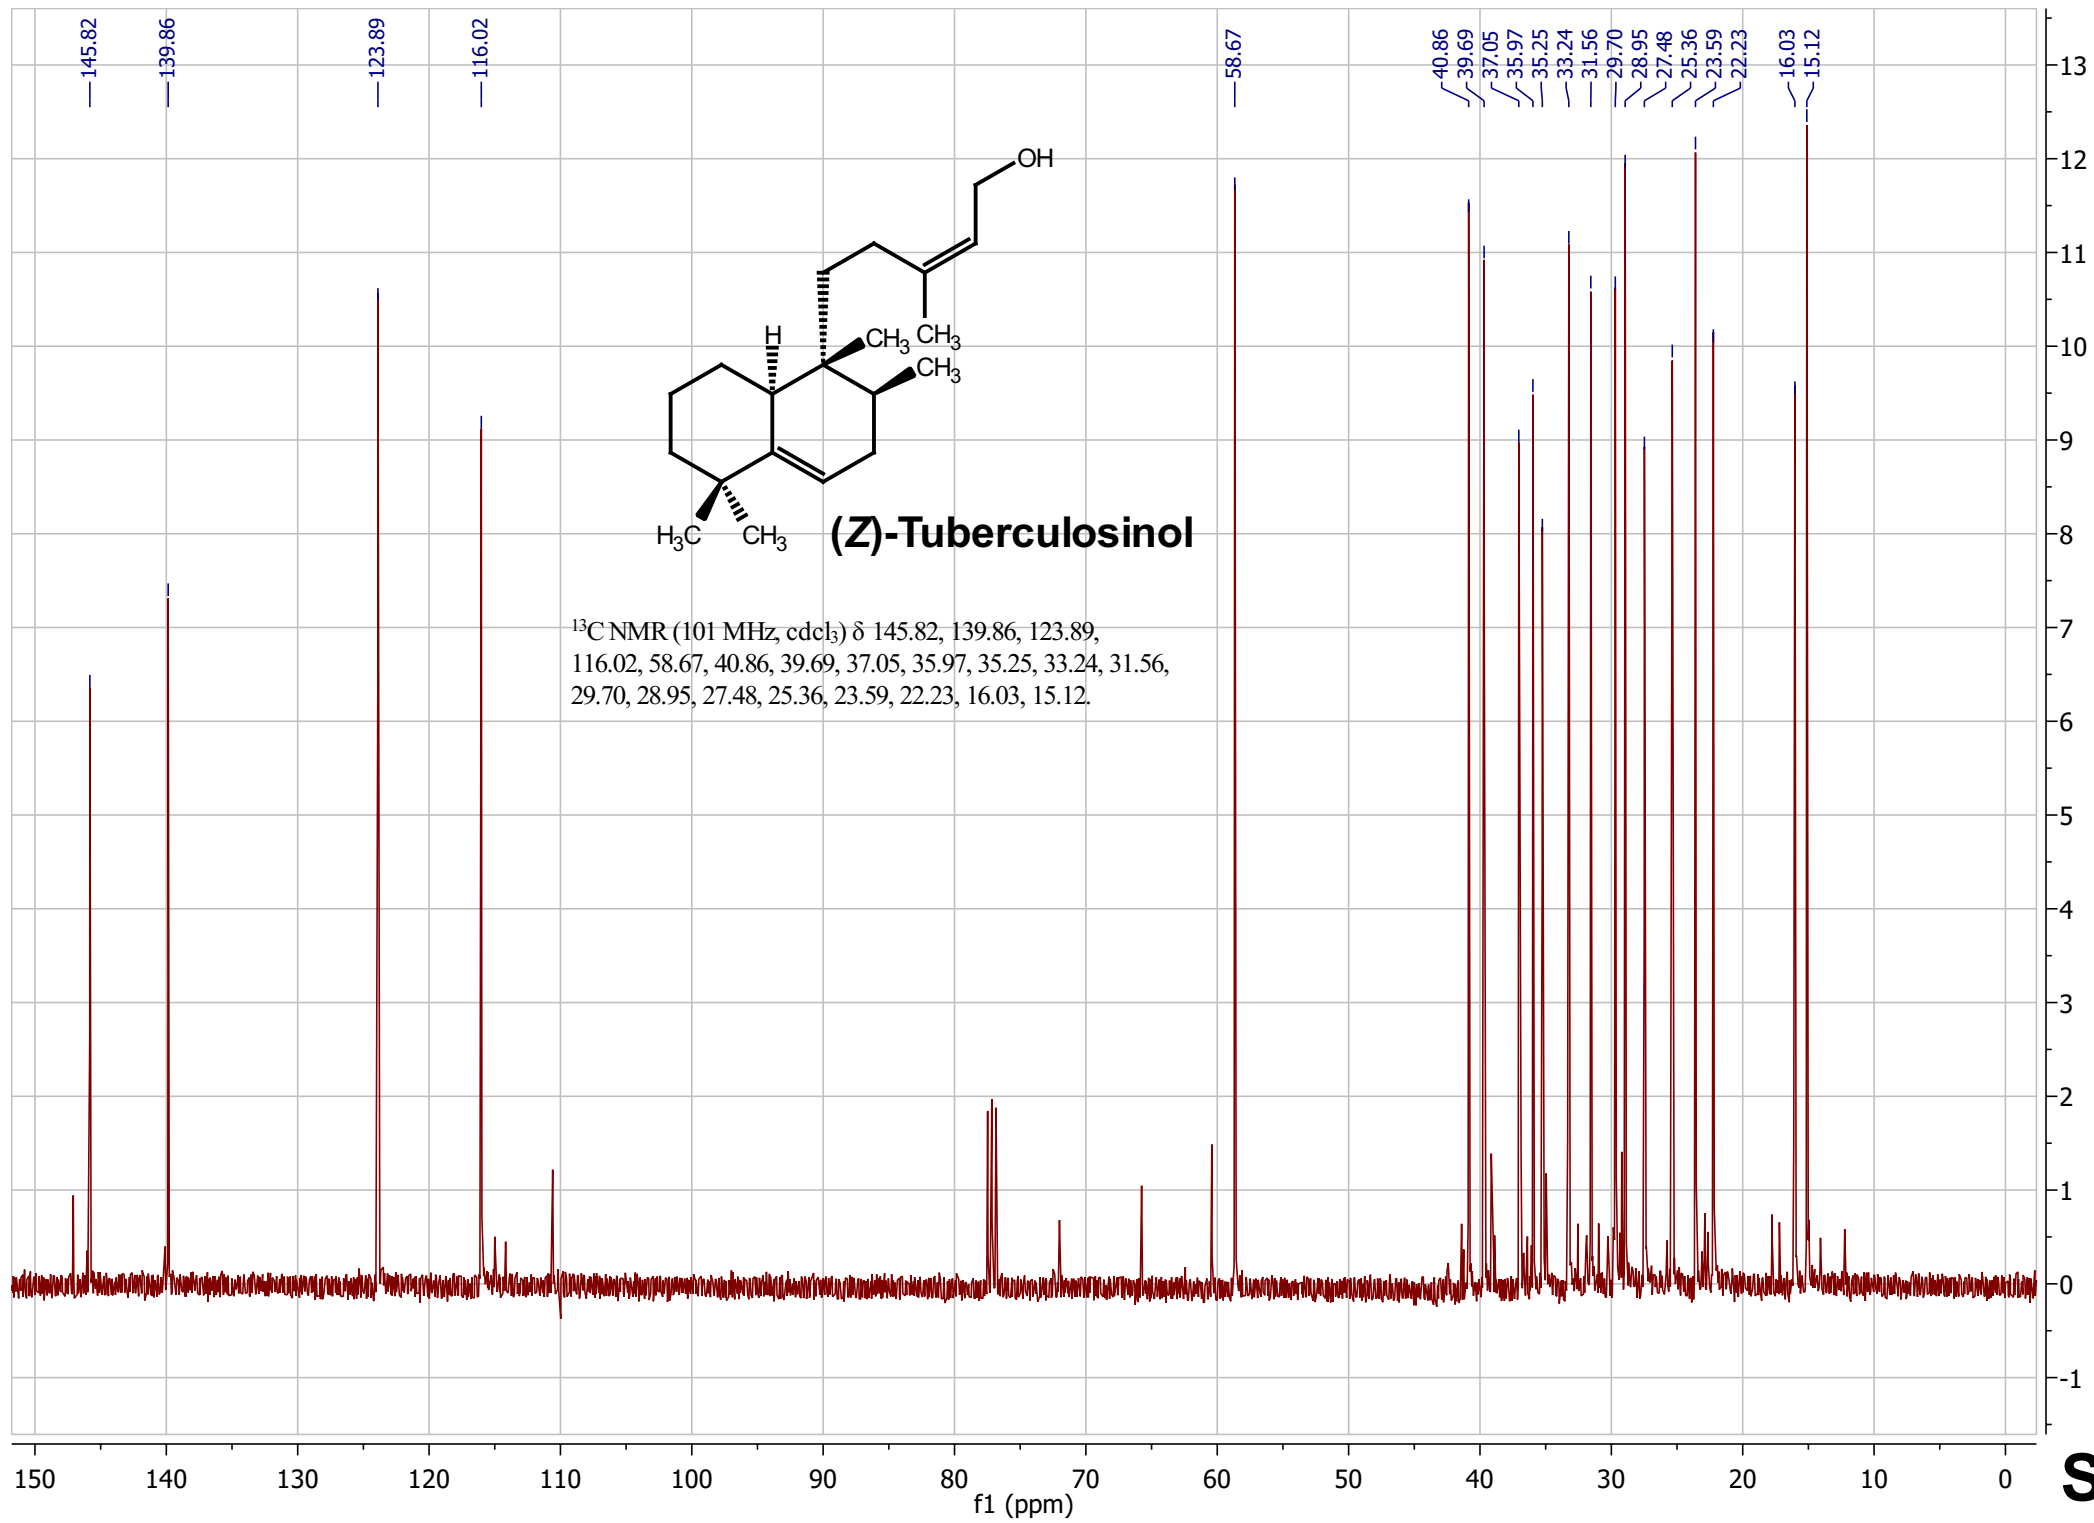

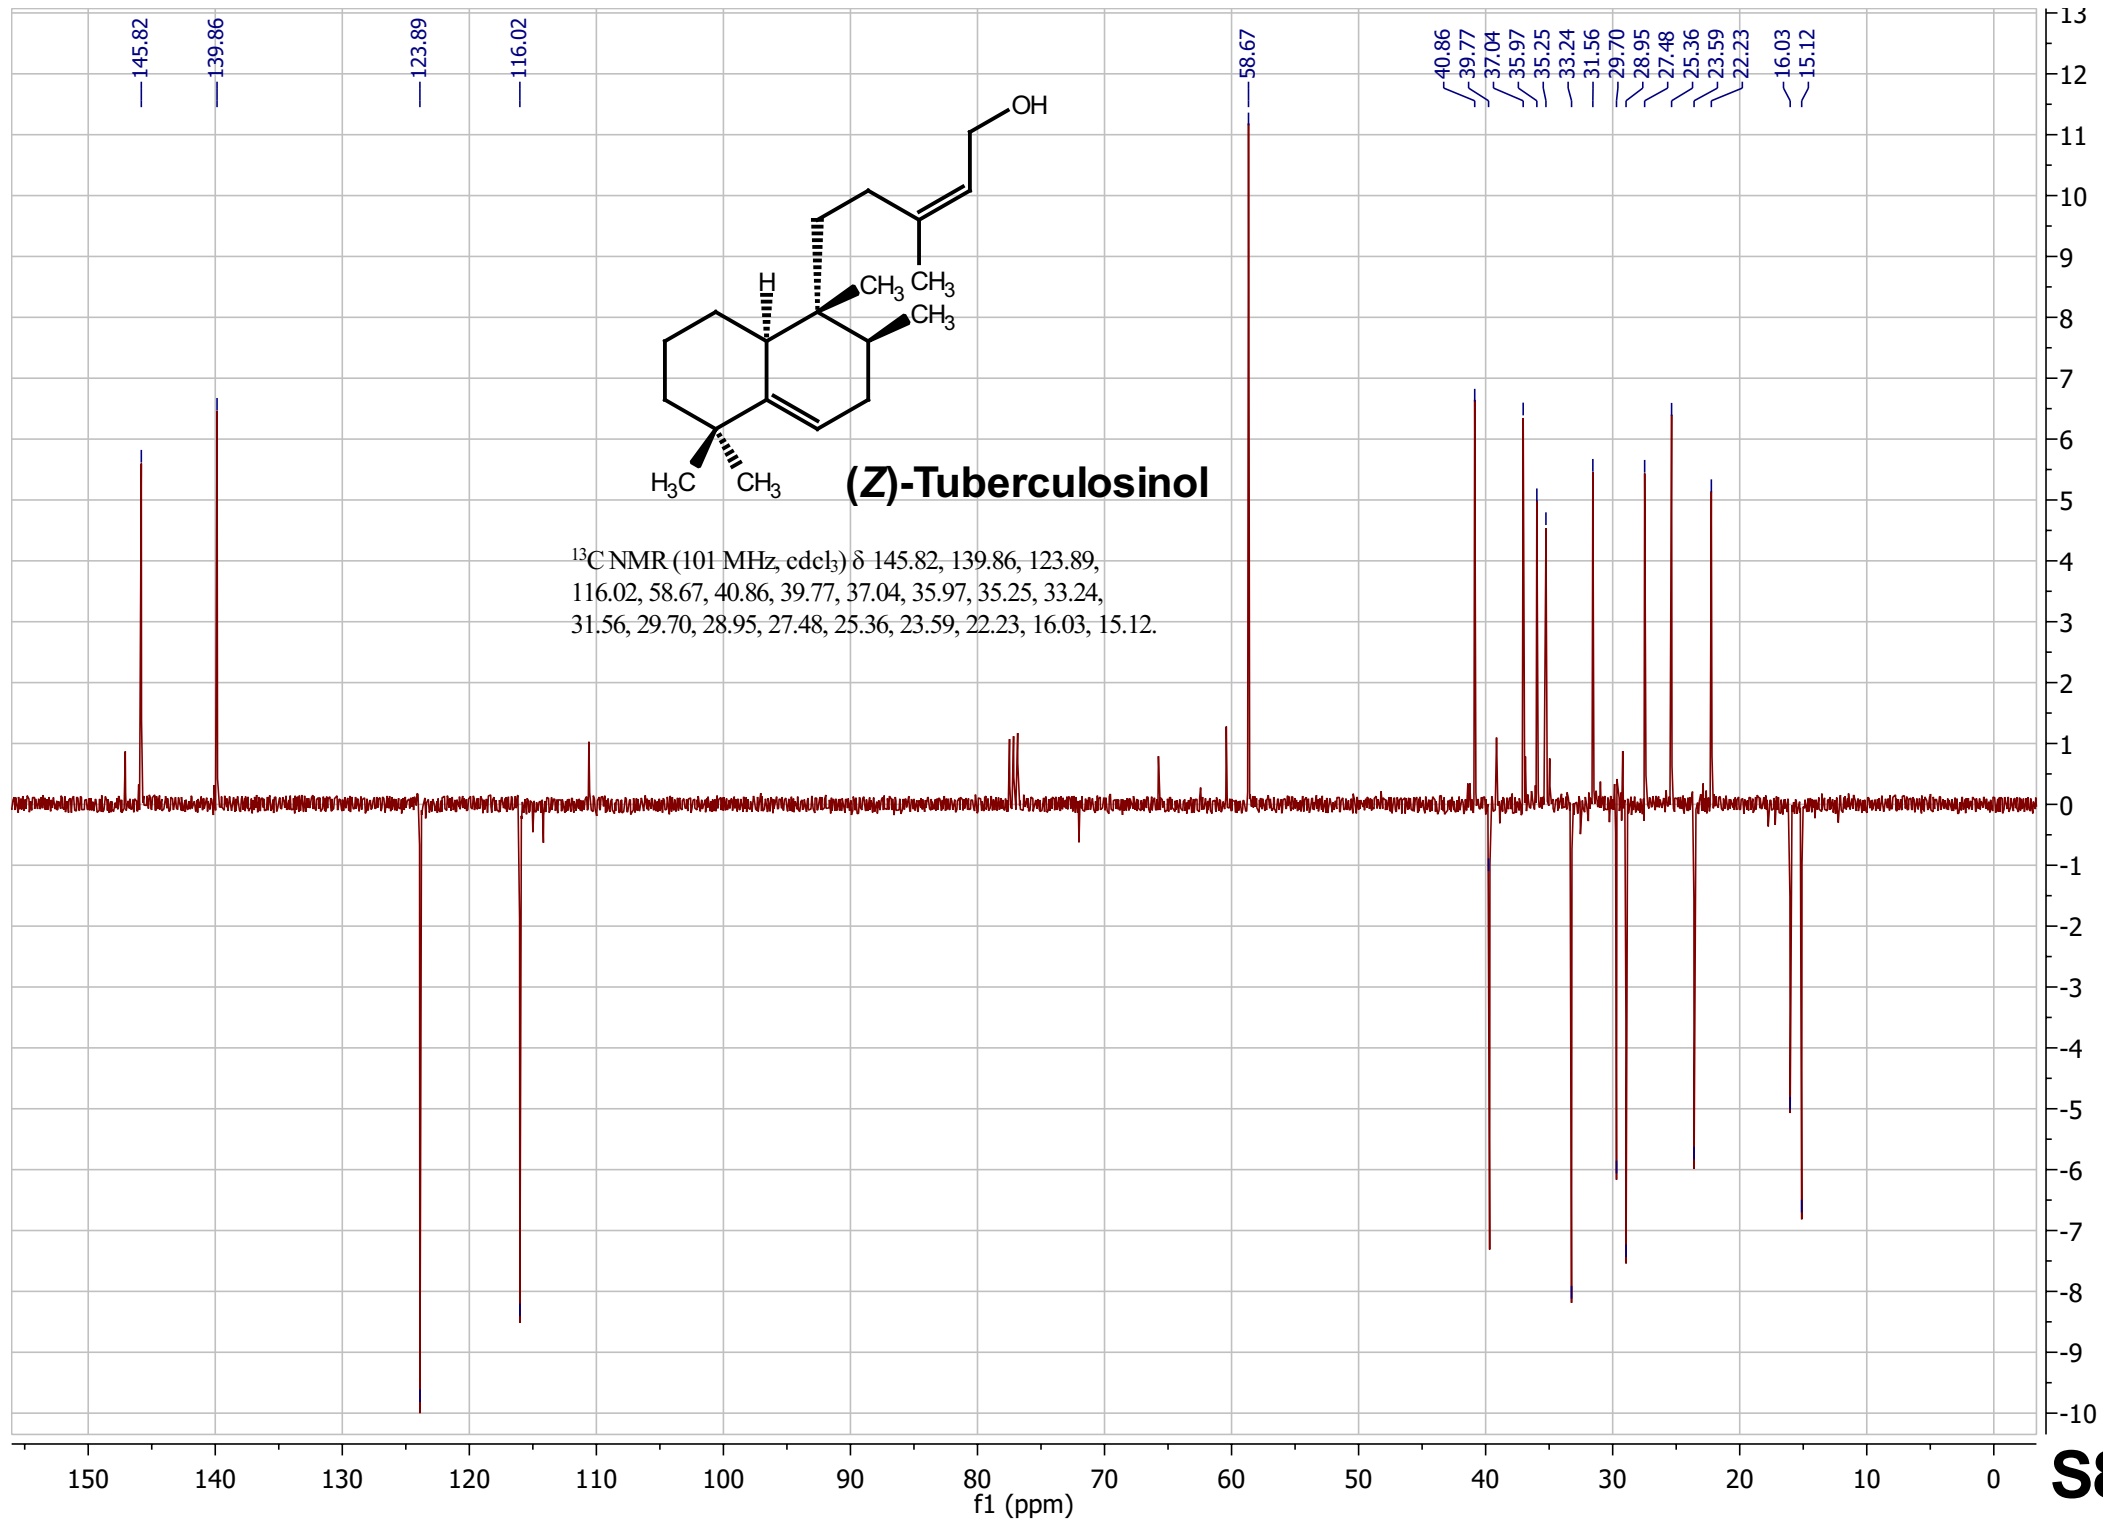

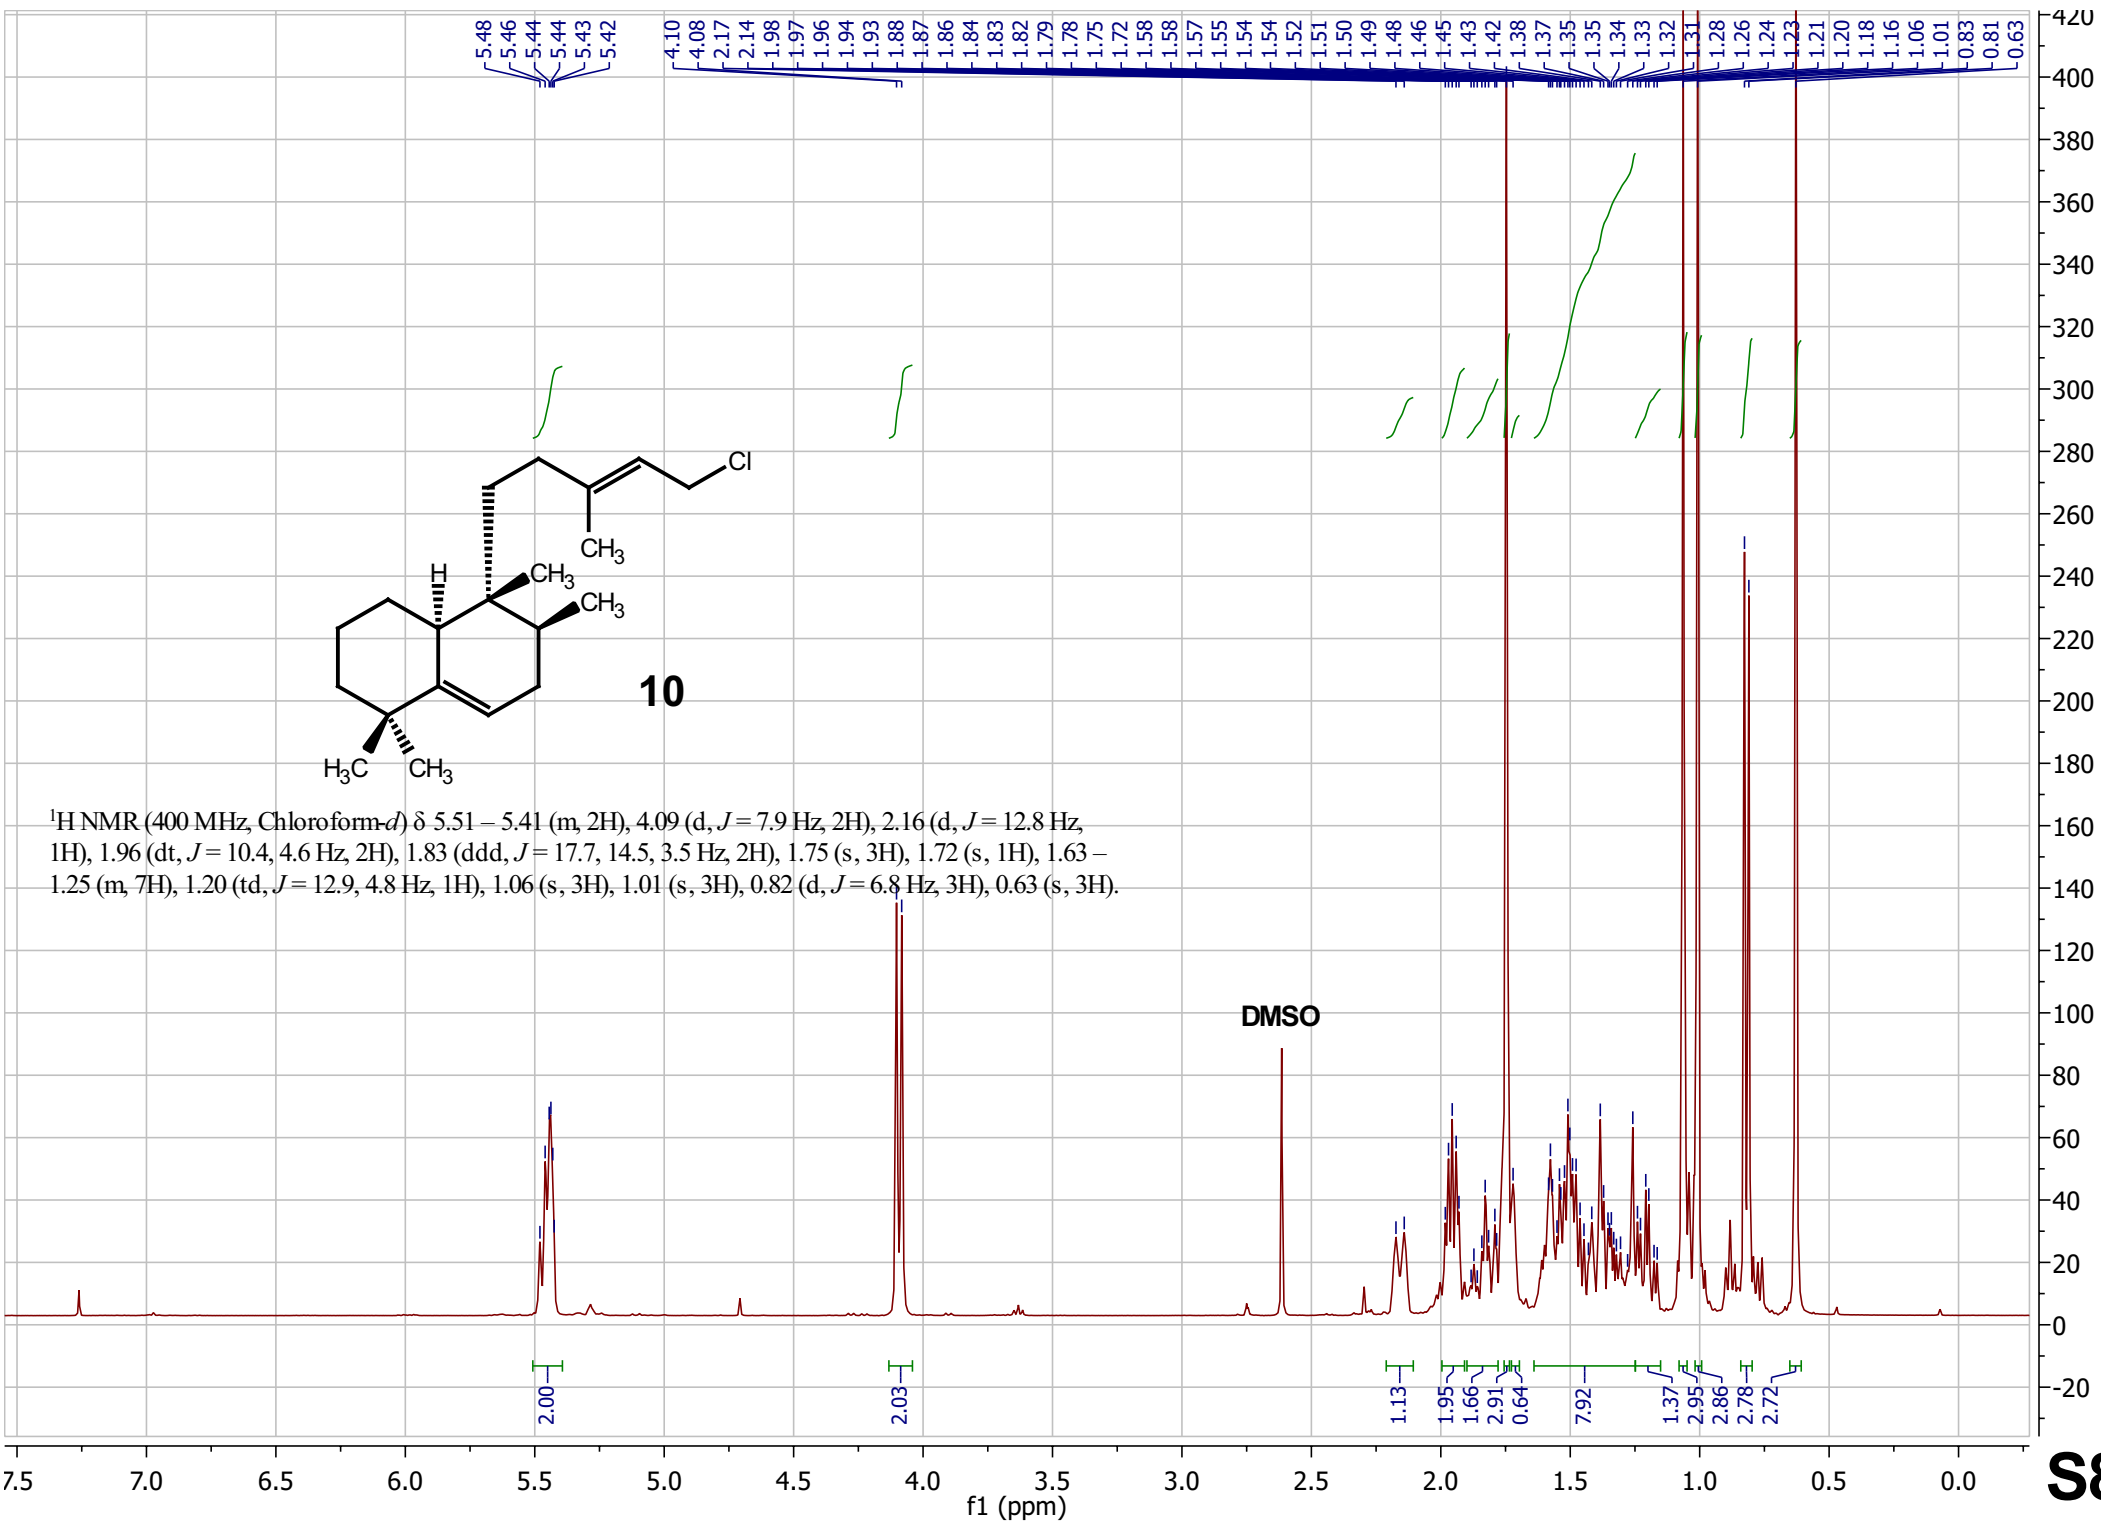

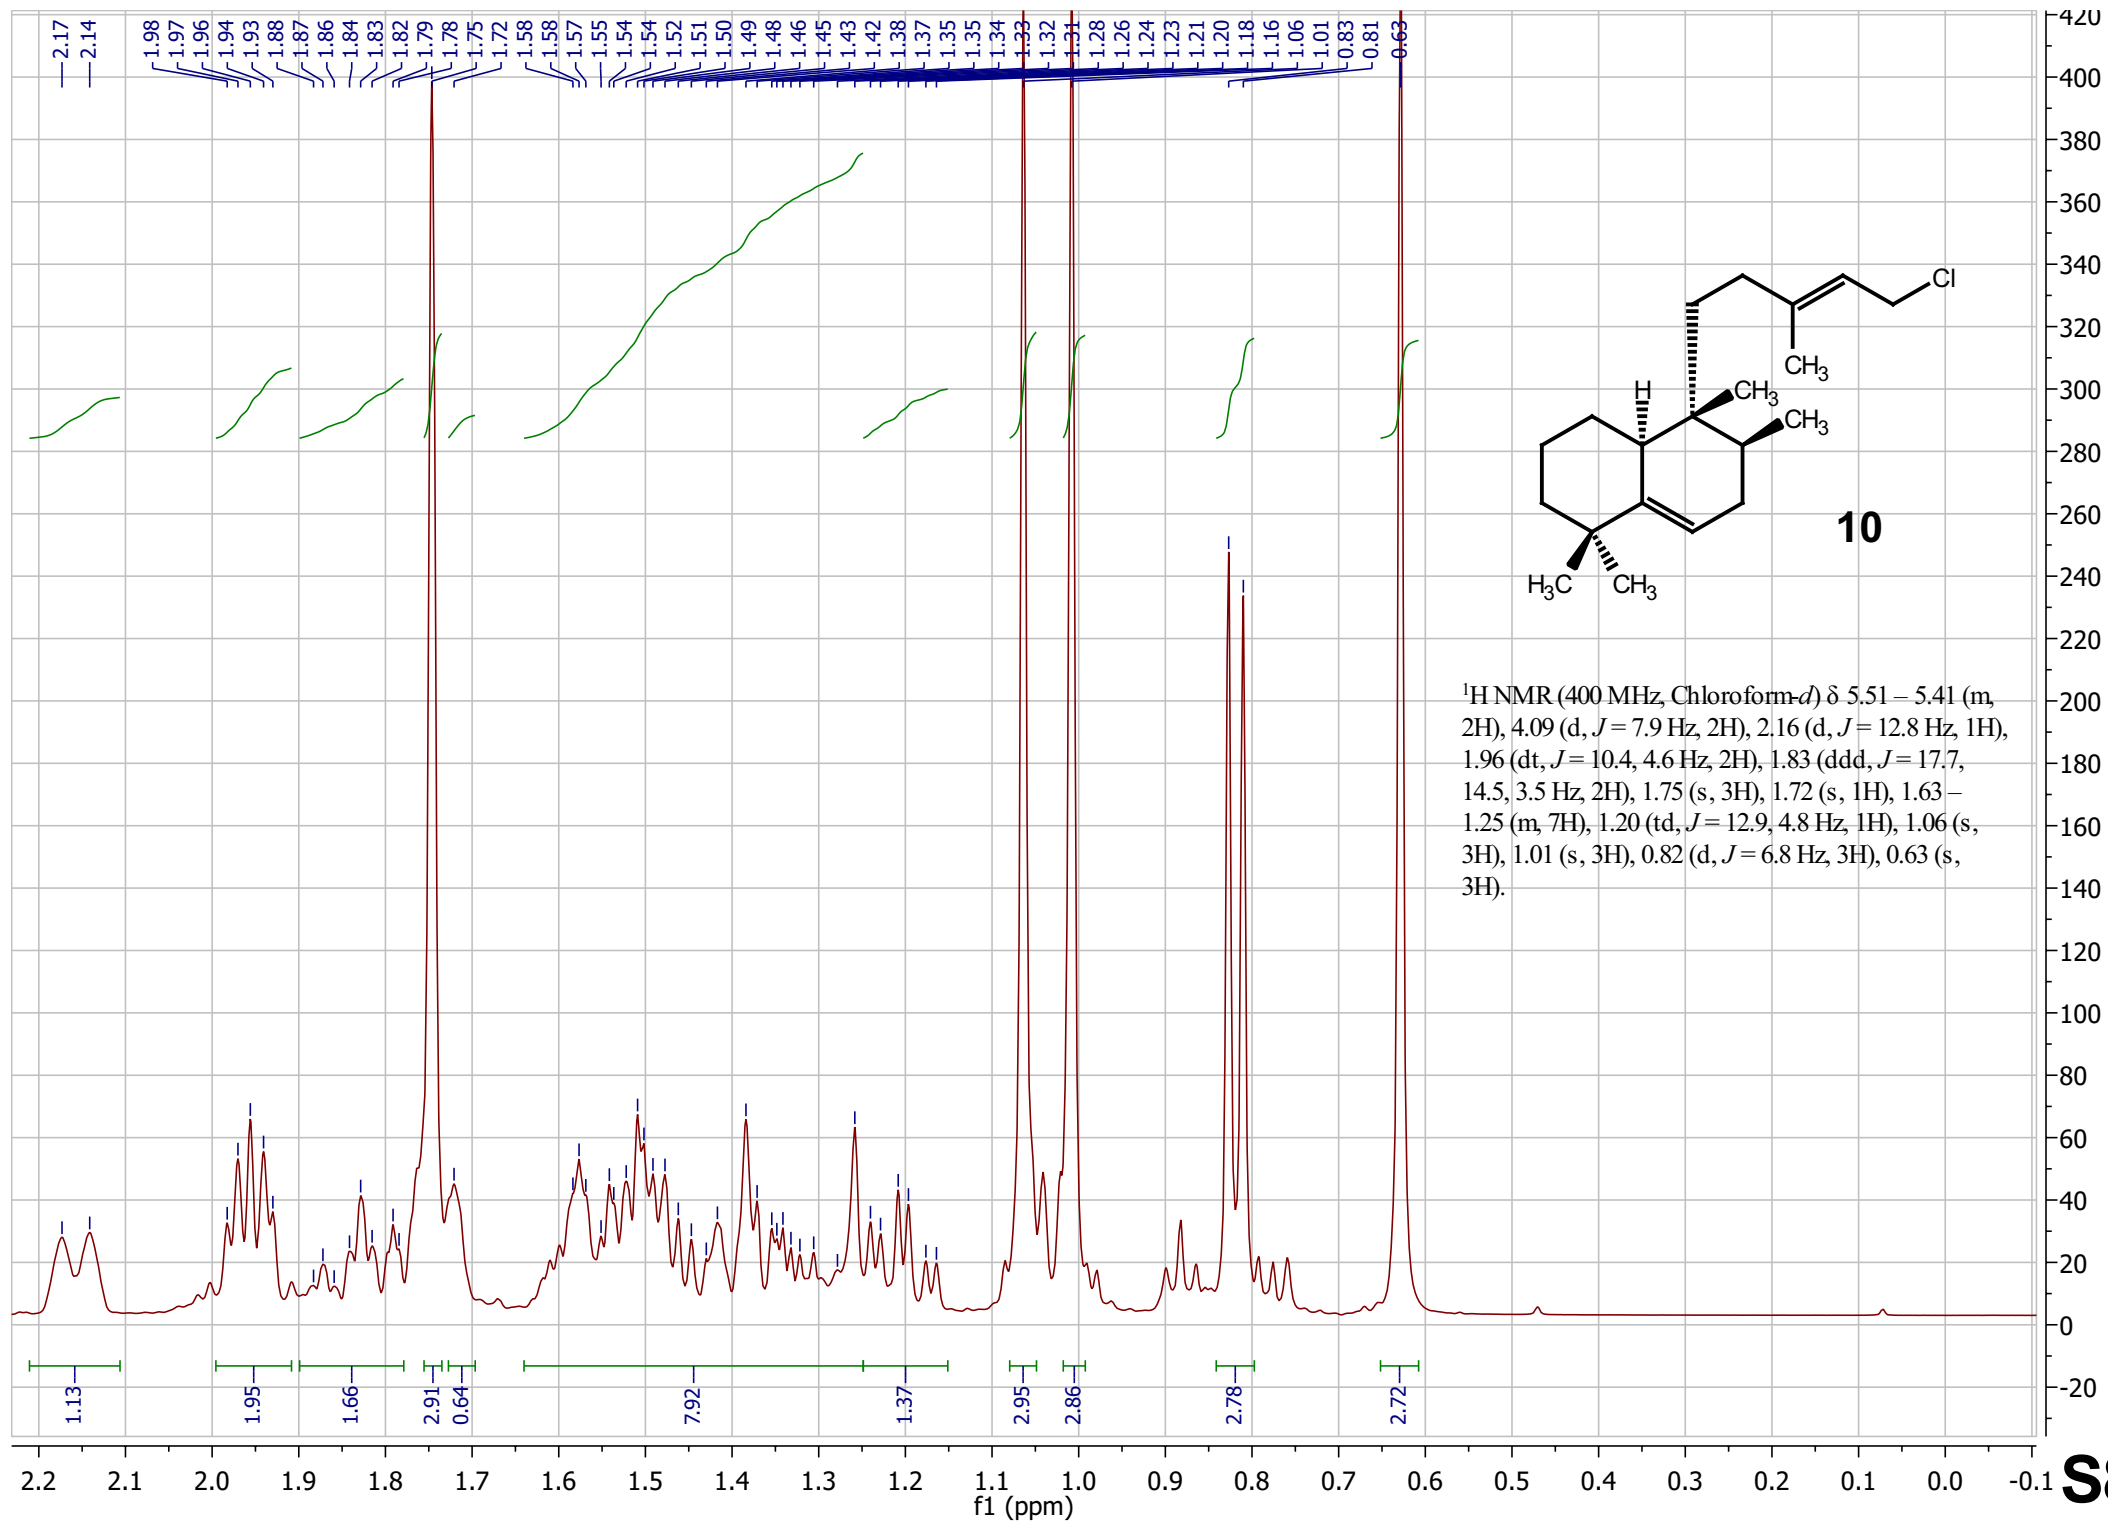

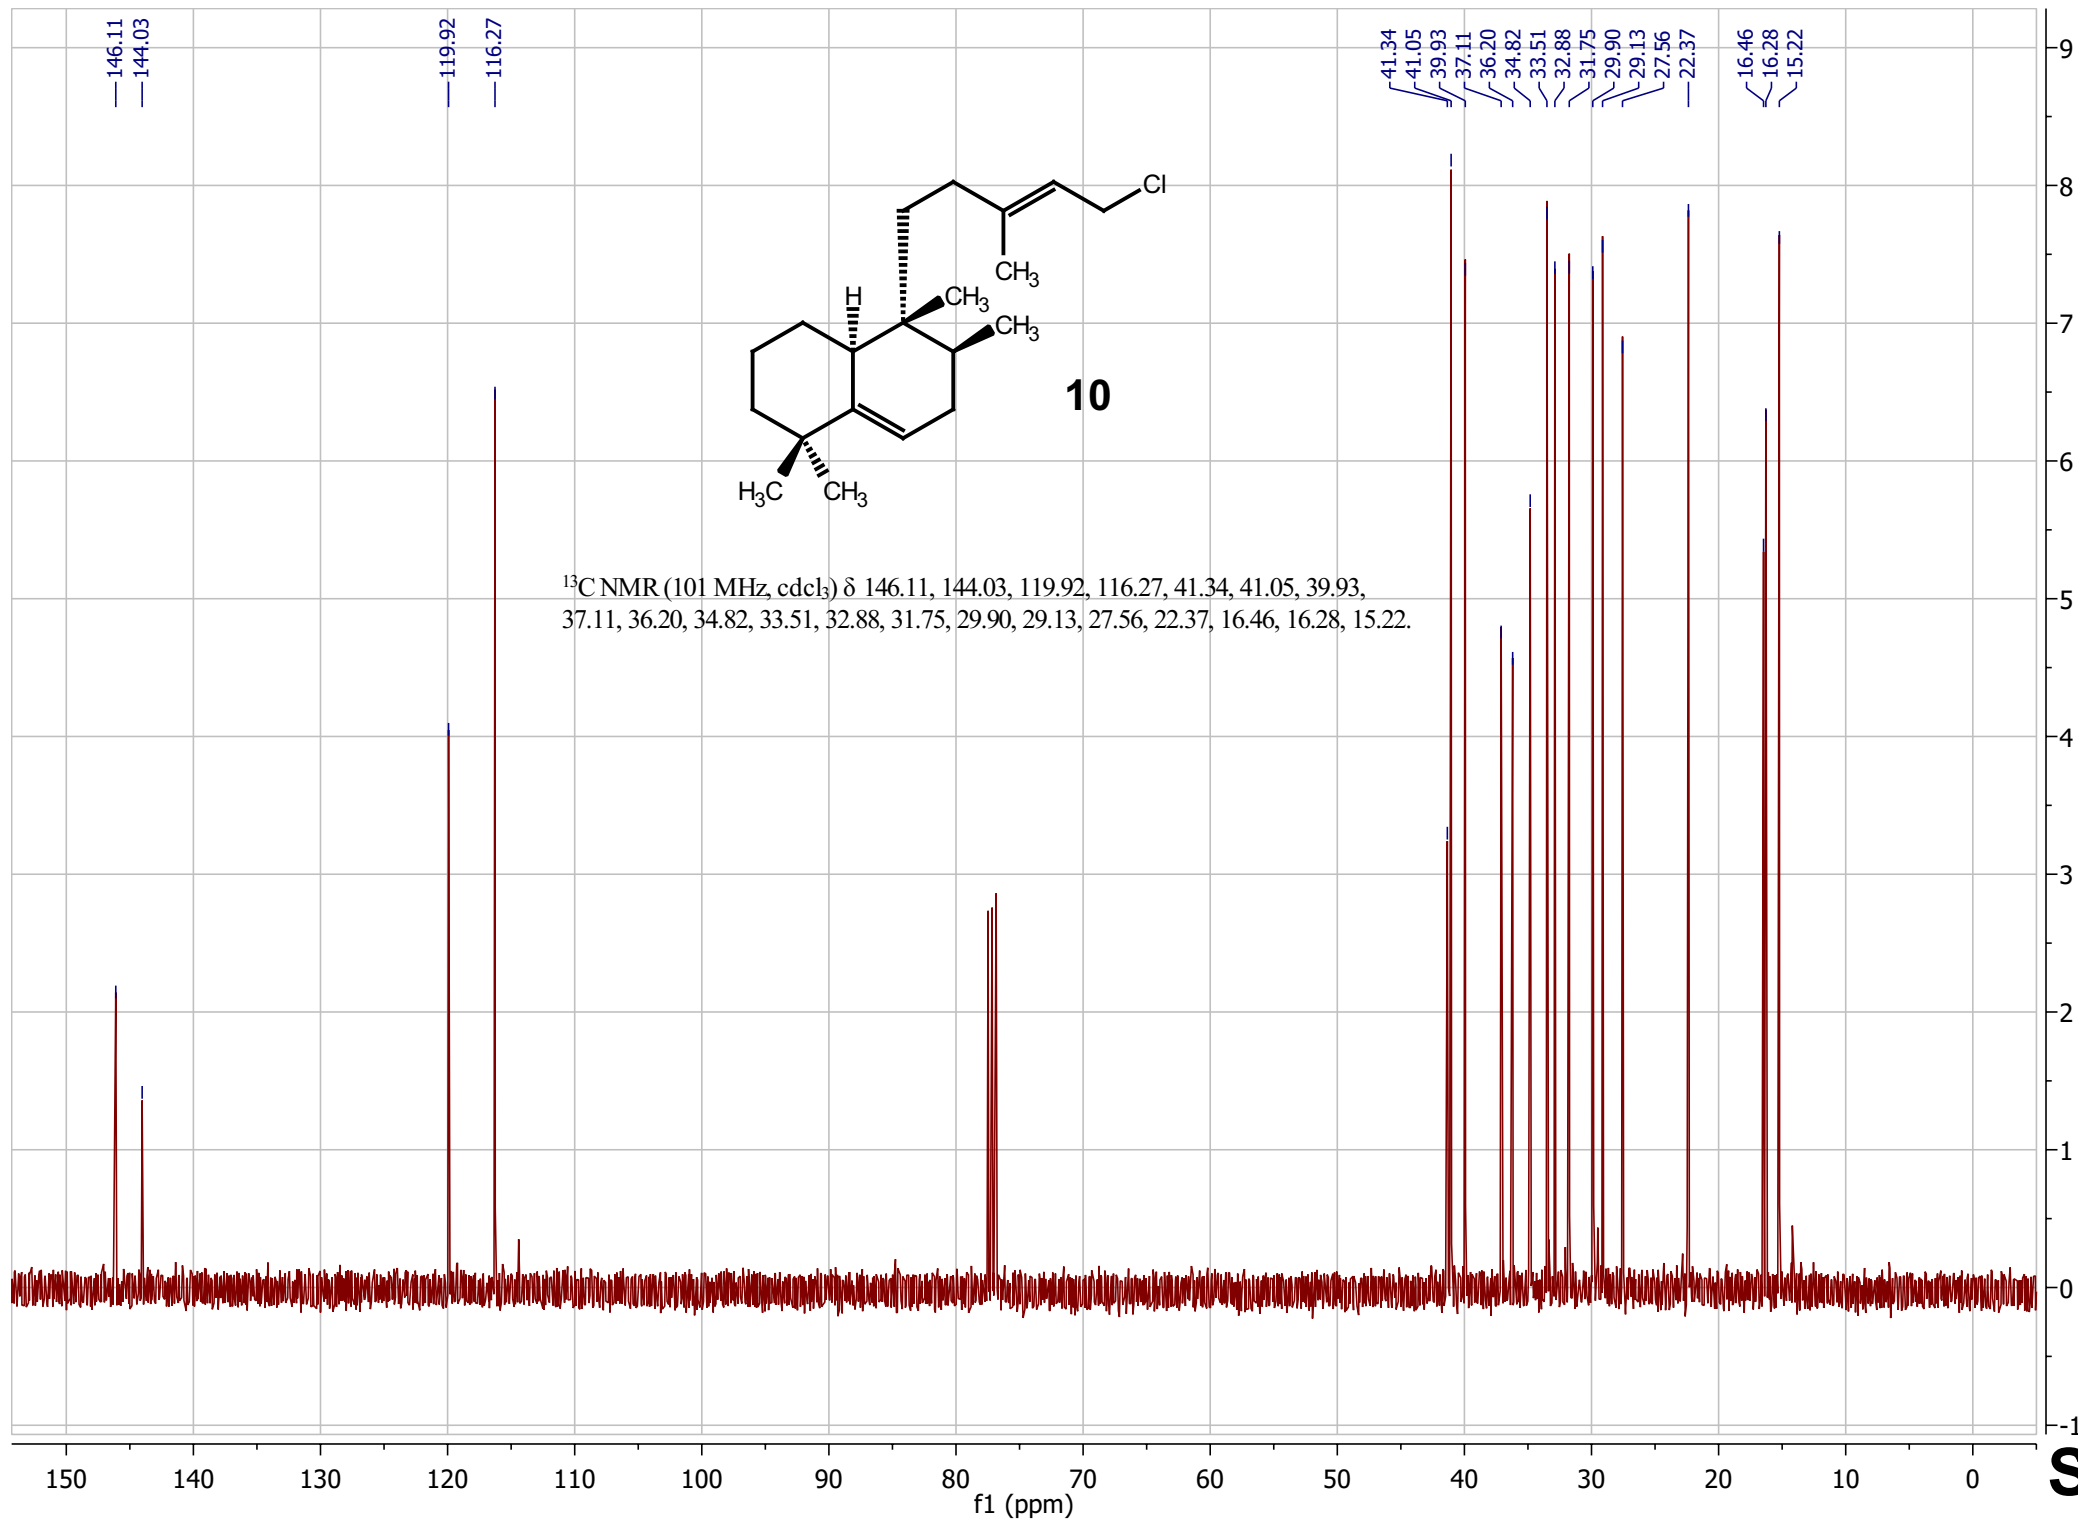

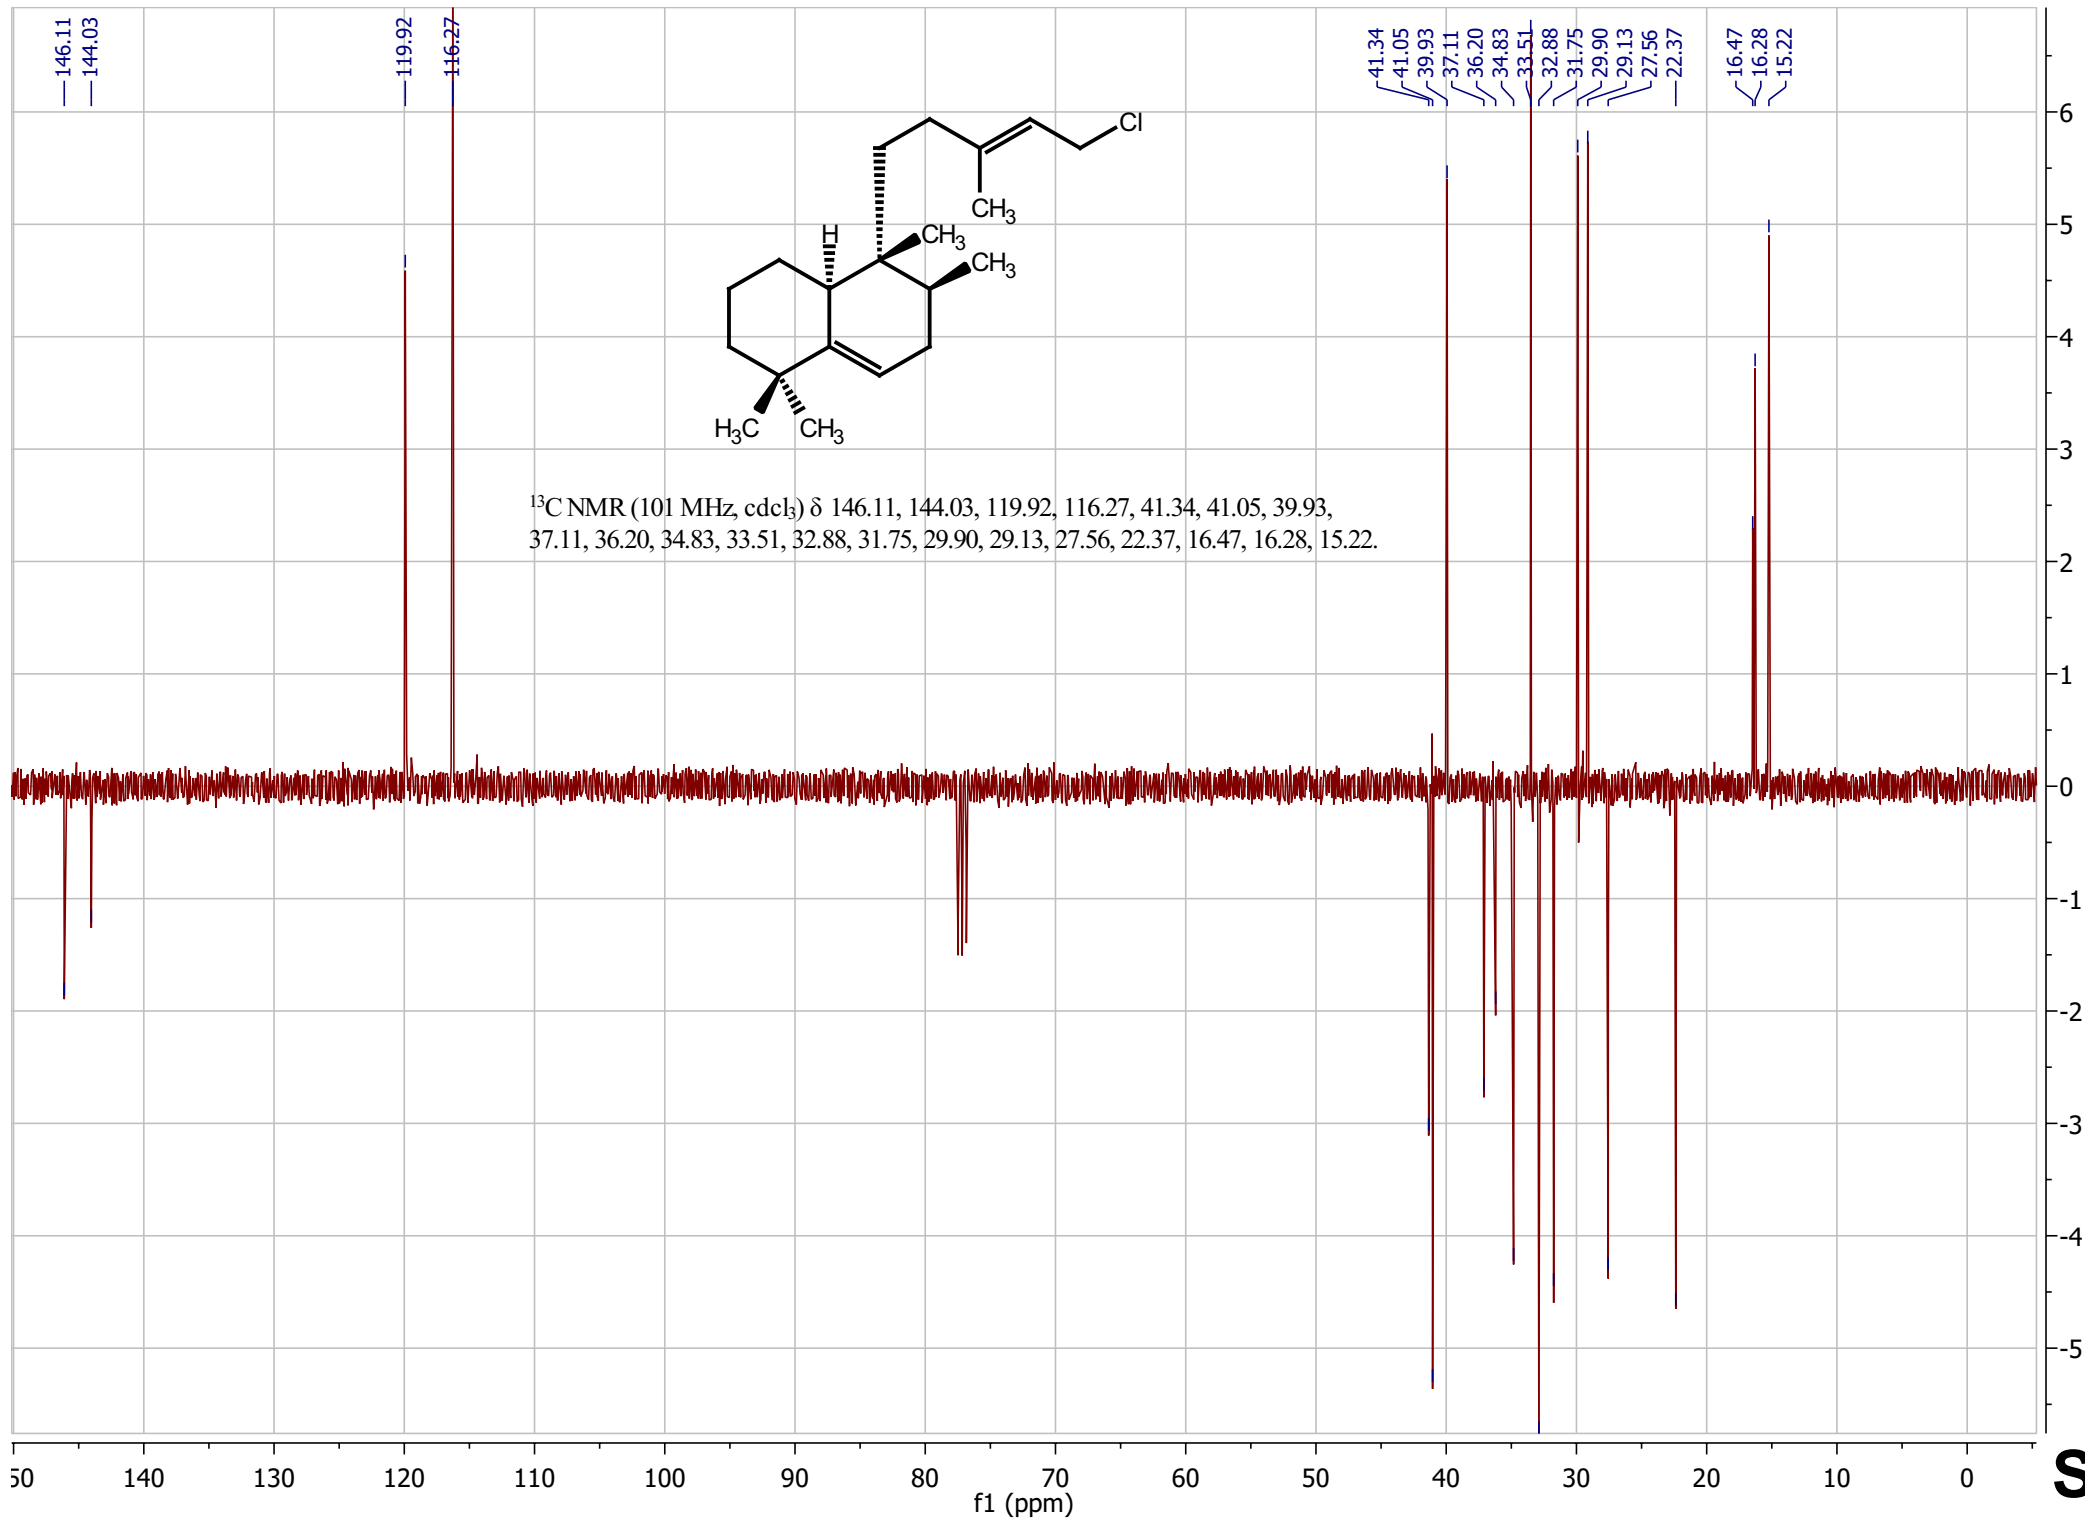

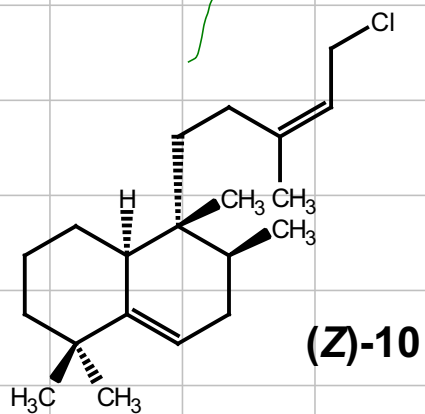

**Crude NMR (no column chromatography performed!)**

<sup>1</sup>H NMR (400 MHz, Chloroform-*d*) δ 5.46 – 5.36 (m, 2H), 4.13 – 4.00 (m, 2H), 2.20 (d, *J* = 12.7 Hz, 1H), 2.01 (dt, *J* = 30.4, 12.7, 5.2 Hz, 3H), 1.86 (dt, *J* = 17.6, 4.7 Hz, 1H), 1.77 (s, 3H), 1.76 – 1.71 (m, 1H), 1.64 – 1.21 (m, 7H), 1.05 (s, 3H), 1.01 (s, 3H), 0.85 (d, *J* = 6.8 Hz, 3H), 0.62 (s, 3H).

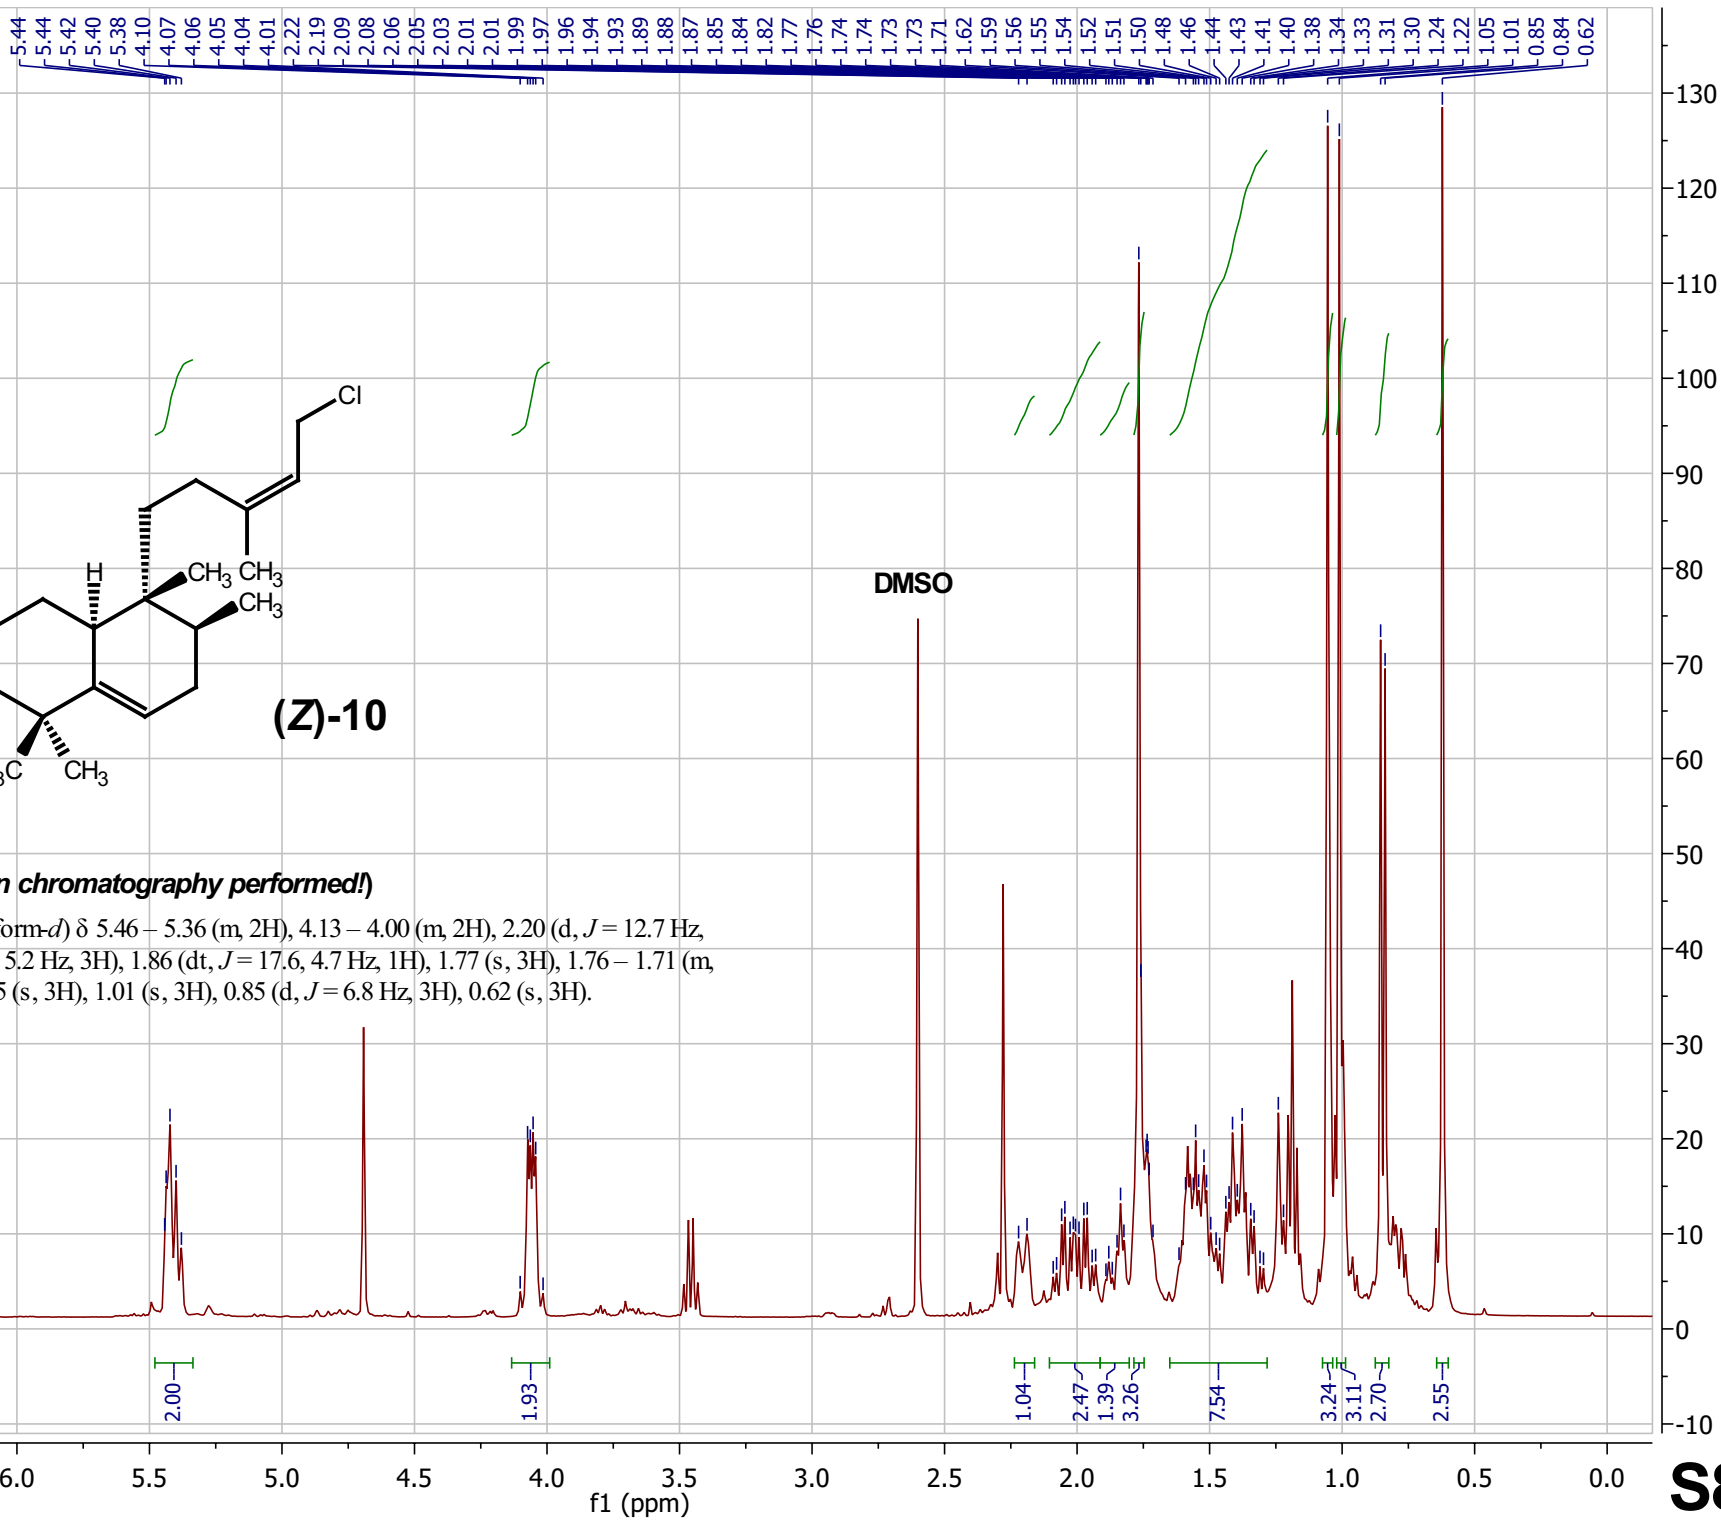

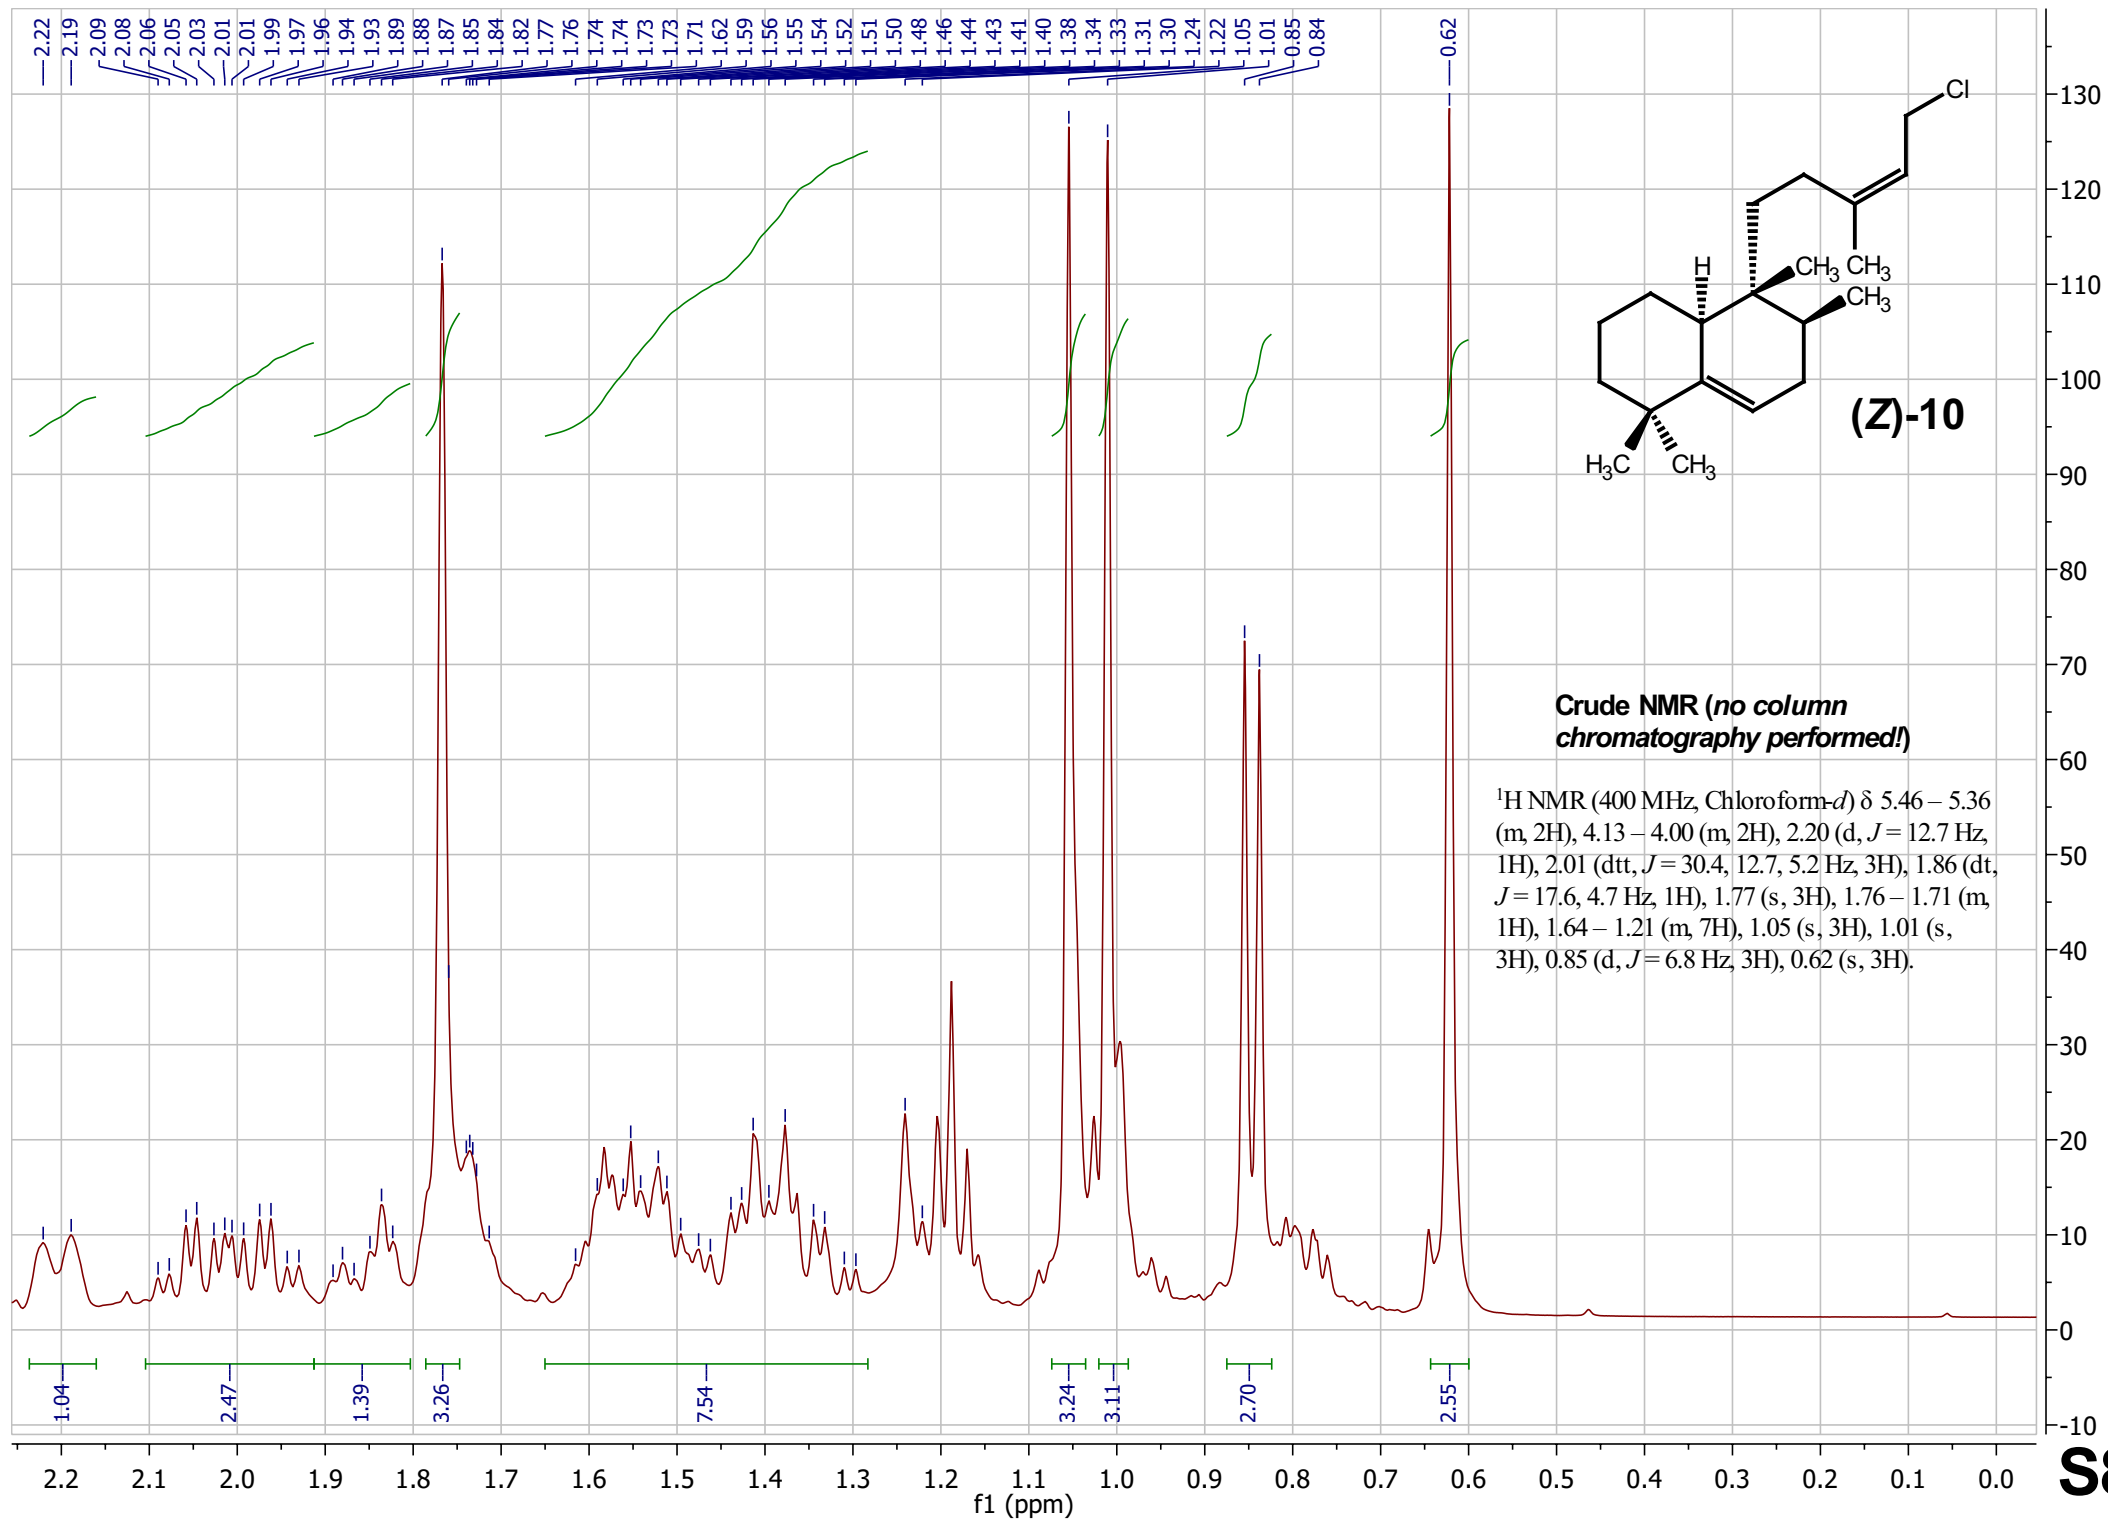



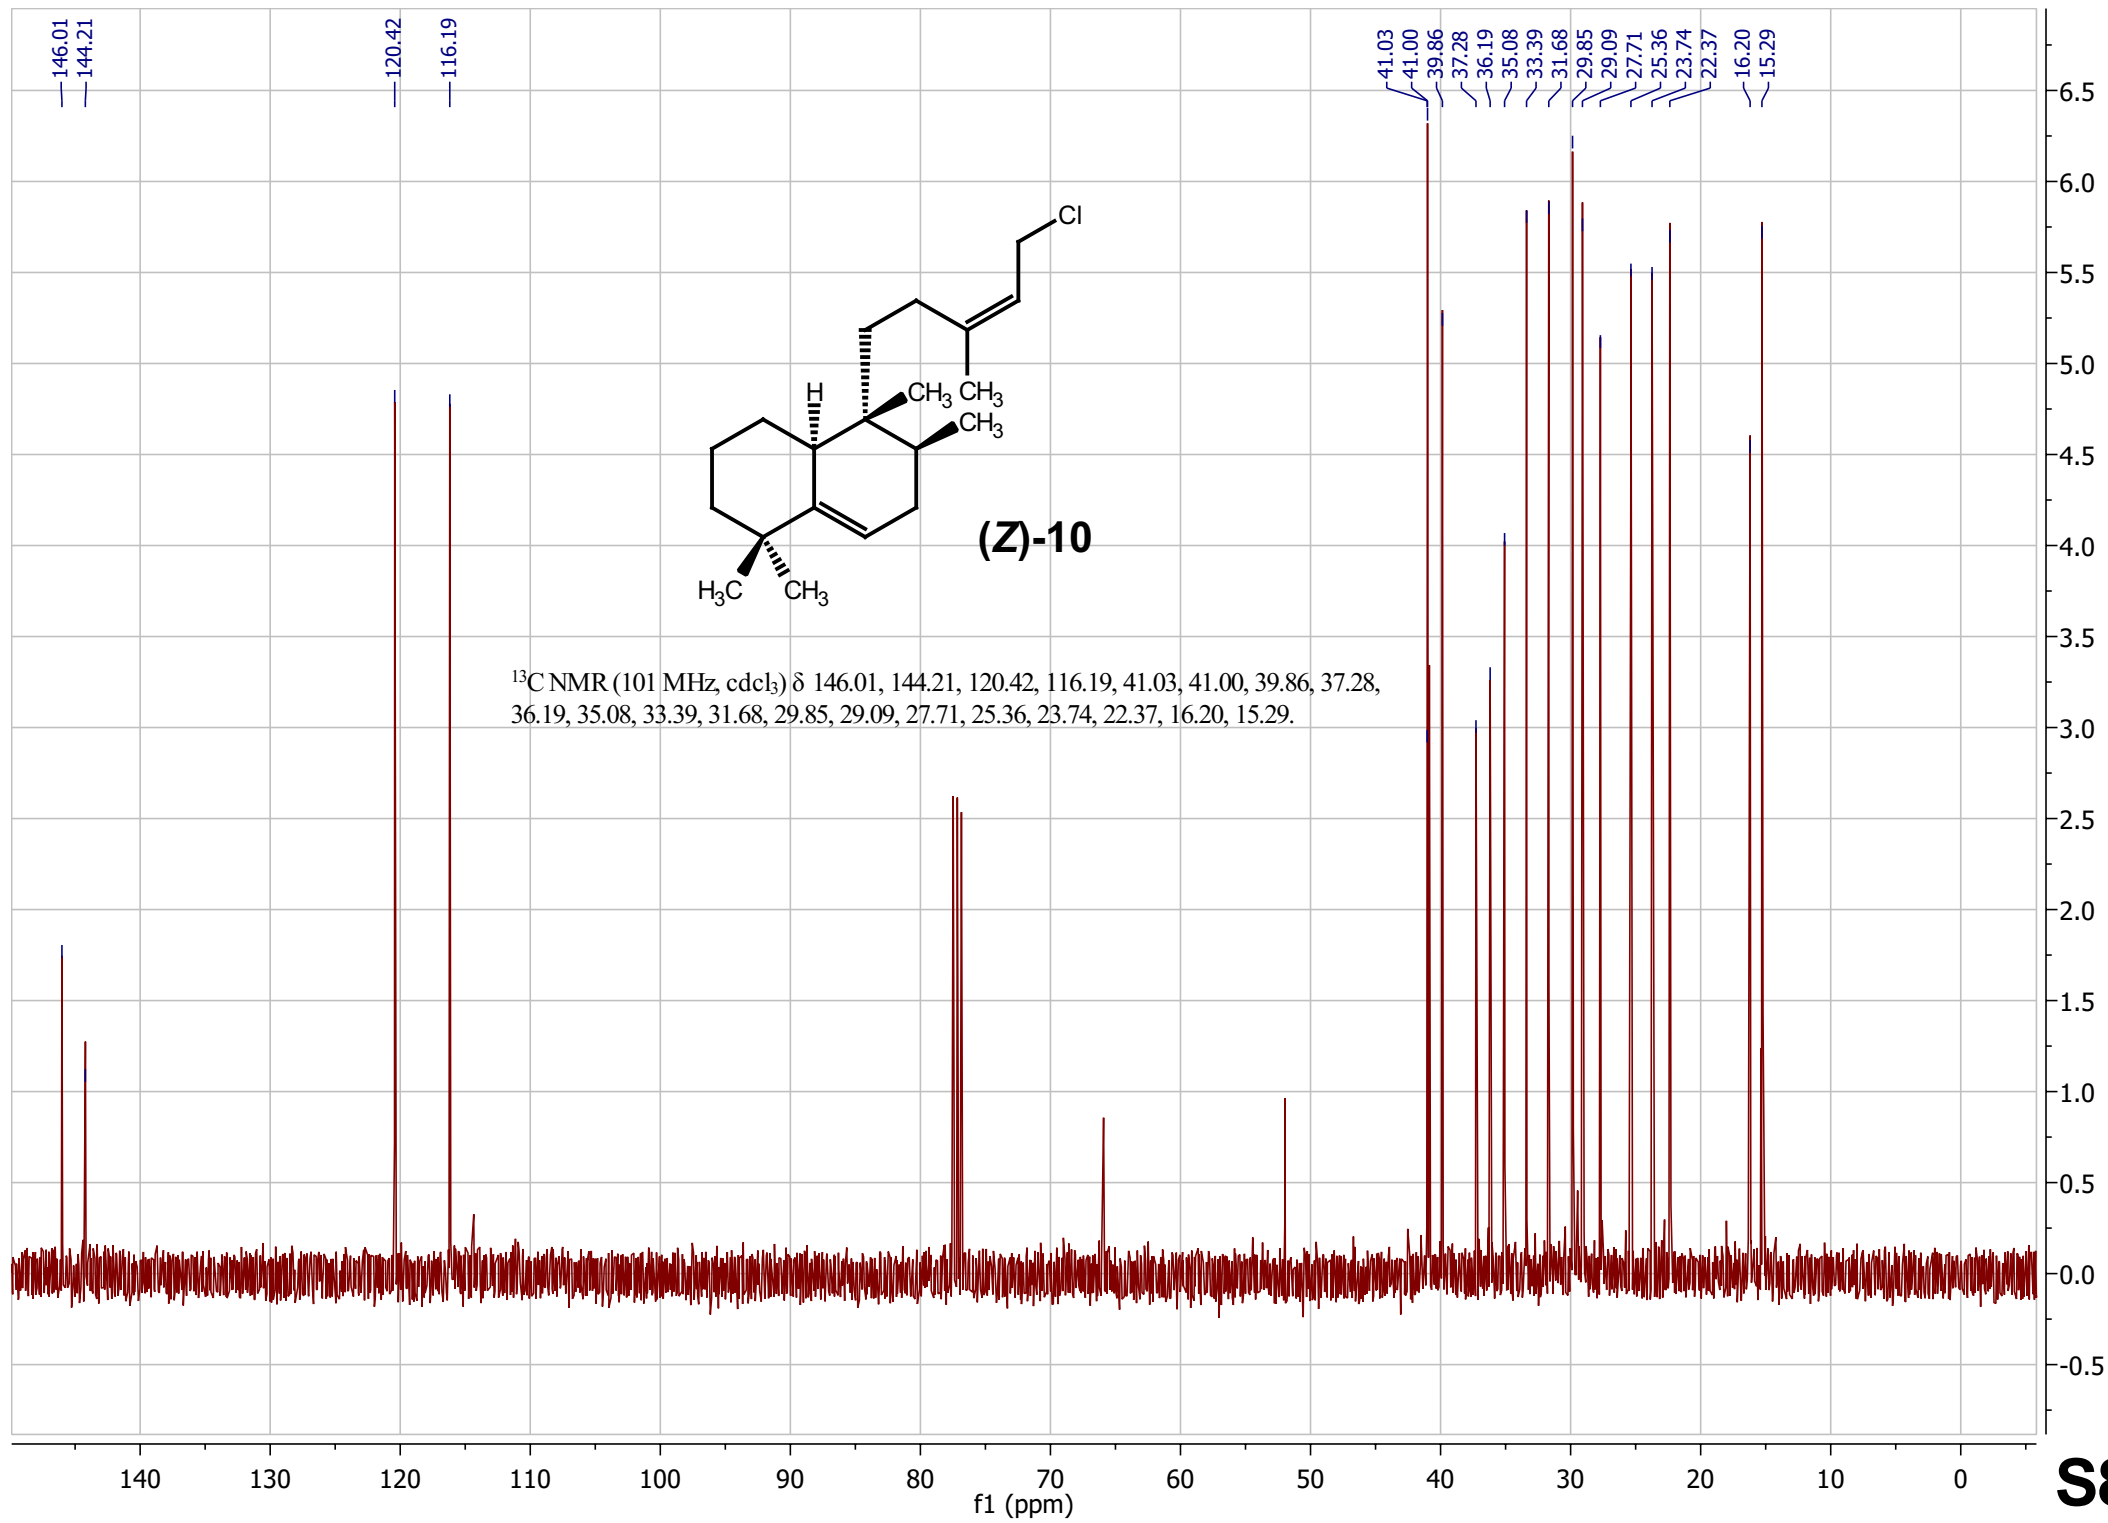

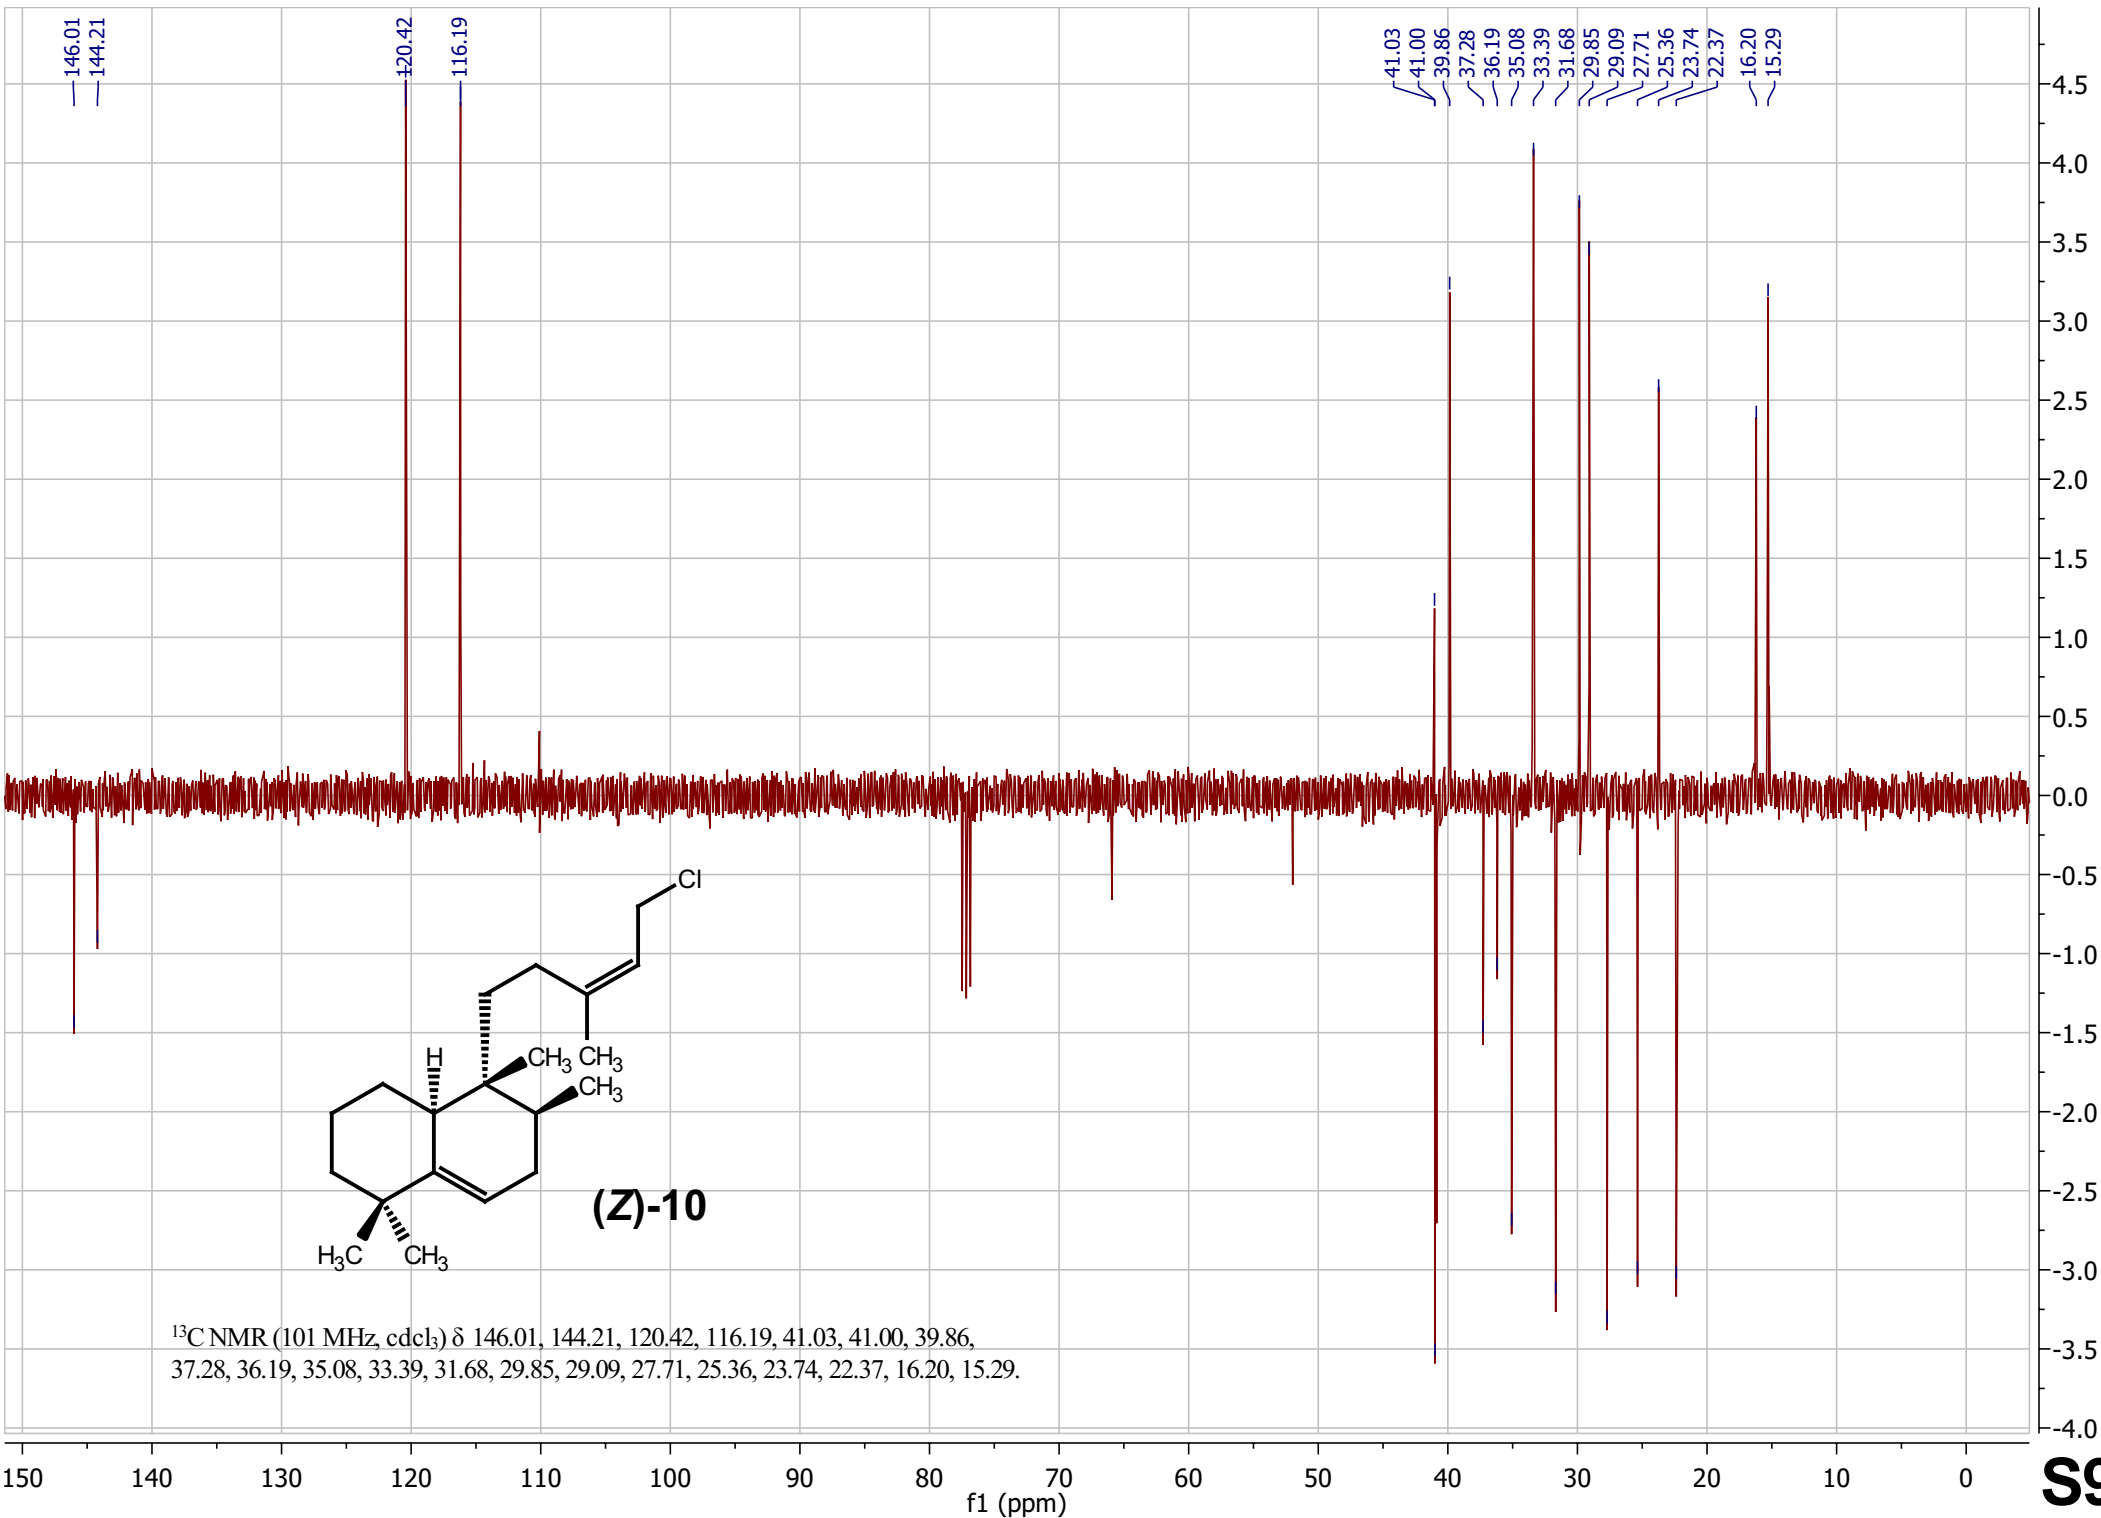

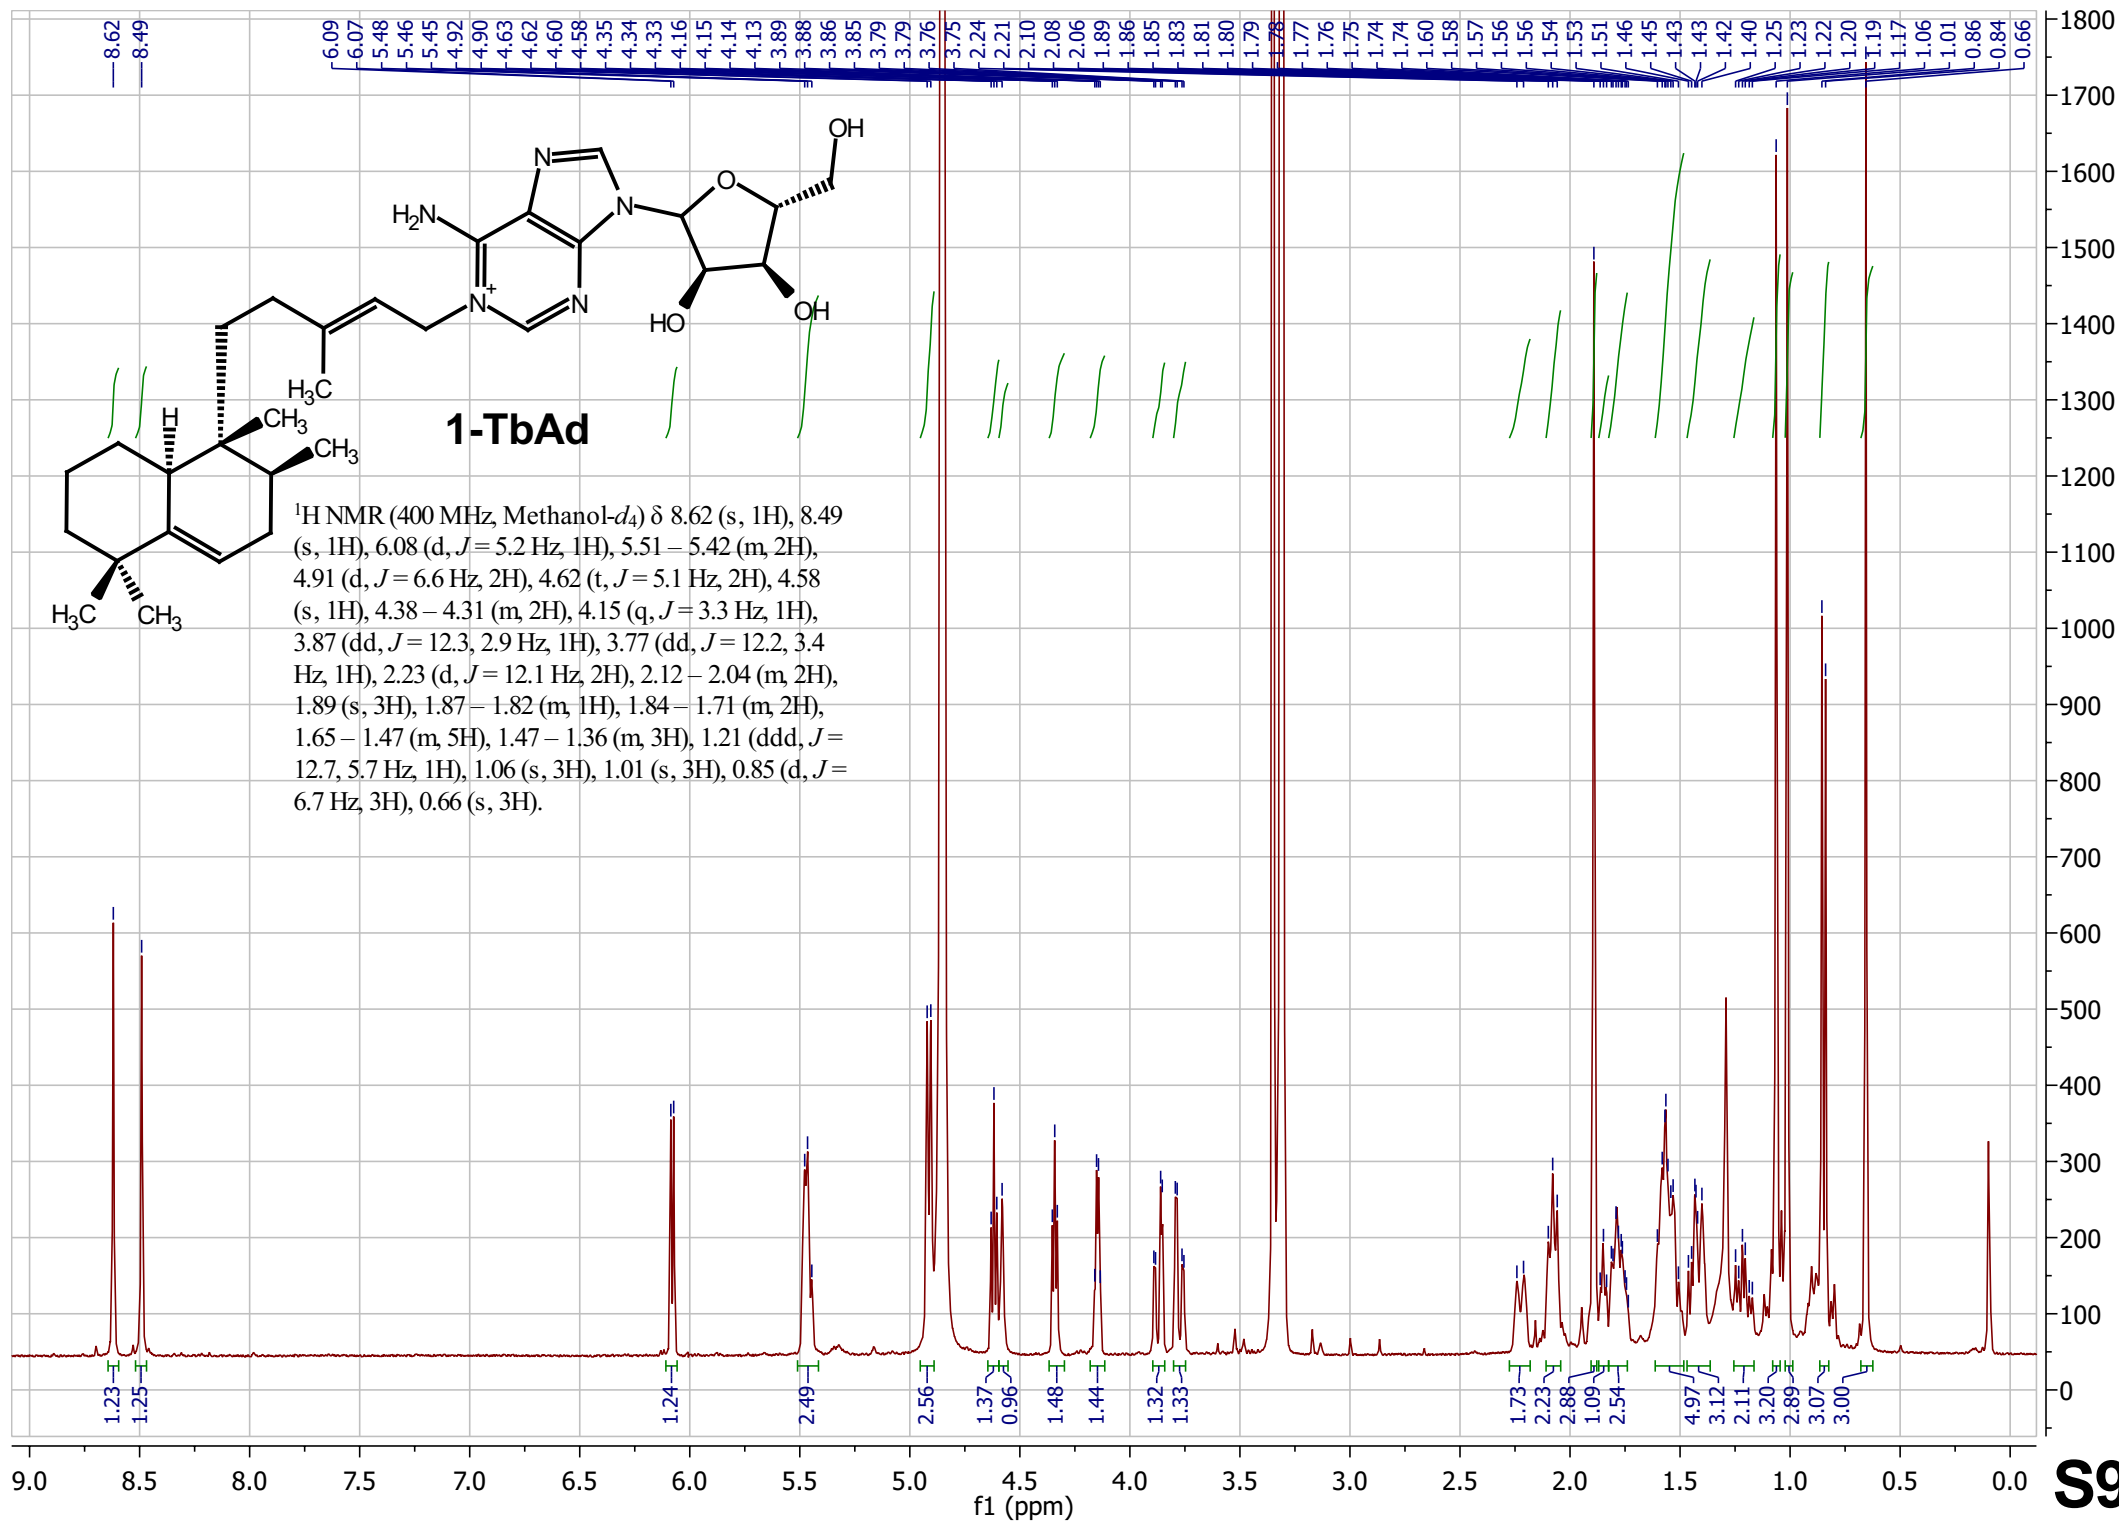

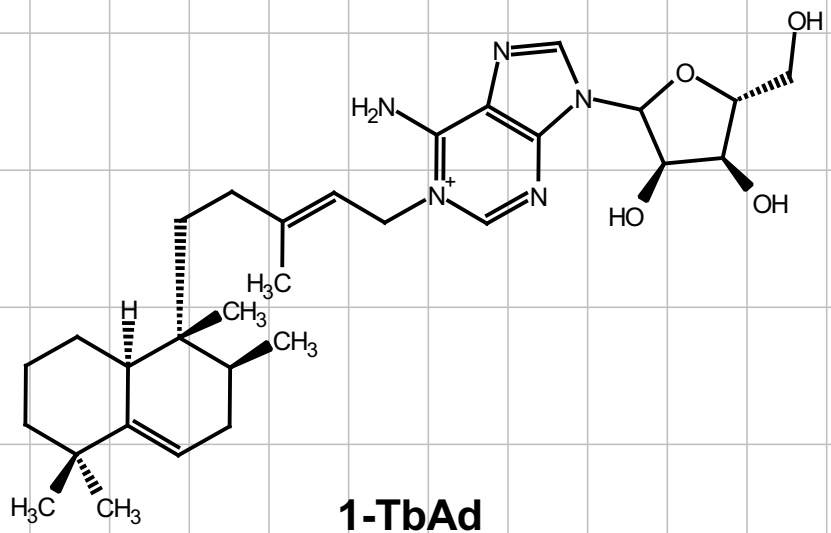

<sup>1</sup>H NMR (400 MHz, Methanol-*d*<sub>4</sub>) δ 8.62 (s, 1H), 8.49 (s, 1H), 6.08 (d, *J* = 5.2 Hz, 1H), 5.51 – 5.42 (m, 2H), 4.91 (d, *J* = 6.6 Hz, 2H), 4.62 (t, *J* = 5.1 Hz, 2H), 4.58 (s, 1H), 4.38 – 4.31 (m, 2H), 4.15 (q, *J* = 3.3 Hz, 1H), 3.87 (dd, *J* = 12.3, 2.9 Hz, 1H), 3.77 (dd, *J* = 12.2, 3.4 Hz, 1H), 2.23 (d, *J* = 12.1 Hz, 2H), 2.12 – 2.04 (m, 2H), 1.89 (s, 3H), 1.87 – 1.82 (m, 1H), 1.84 – 1.71 (m, 2H), 1.65 – 1.47 (m, 5H), 1.47 – 1.36 (m, 3H), 1.21 (ddd, *J* = 12.7, 5.7 Hz, 1H), 1.06 (s, 3H), 1.01 (s, 3H), 0.85 (d, *J* = 6.7 Hz, 3H), 0.66 (s, 3H).

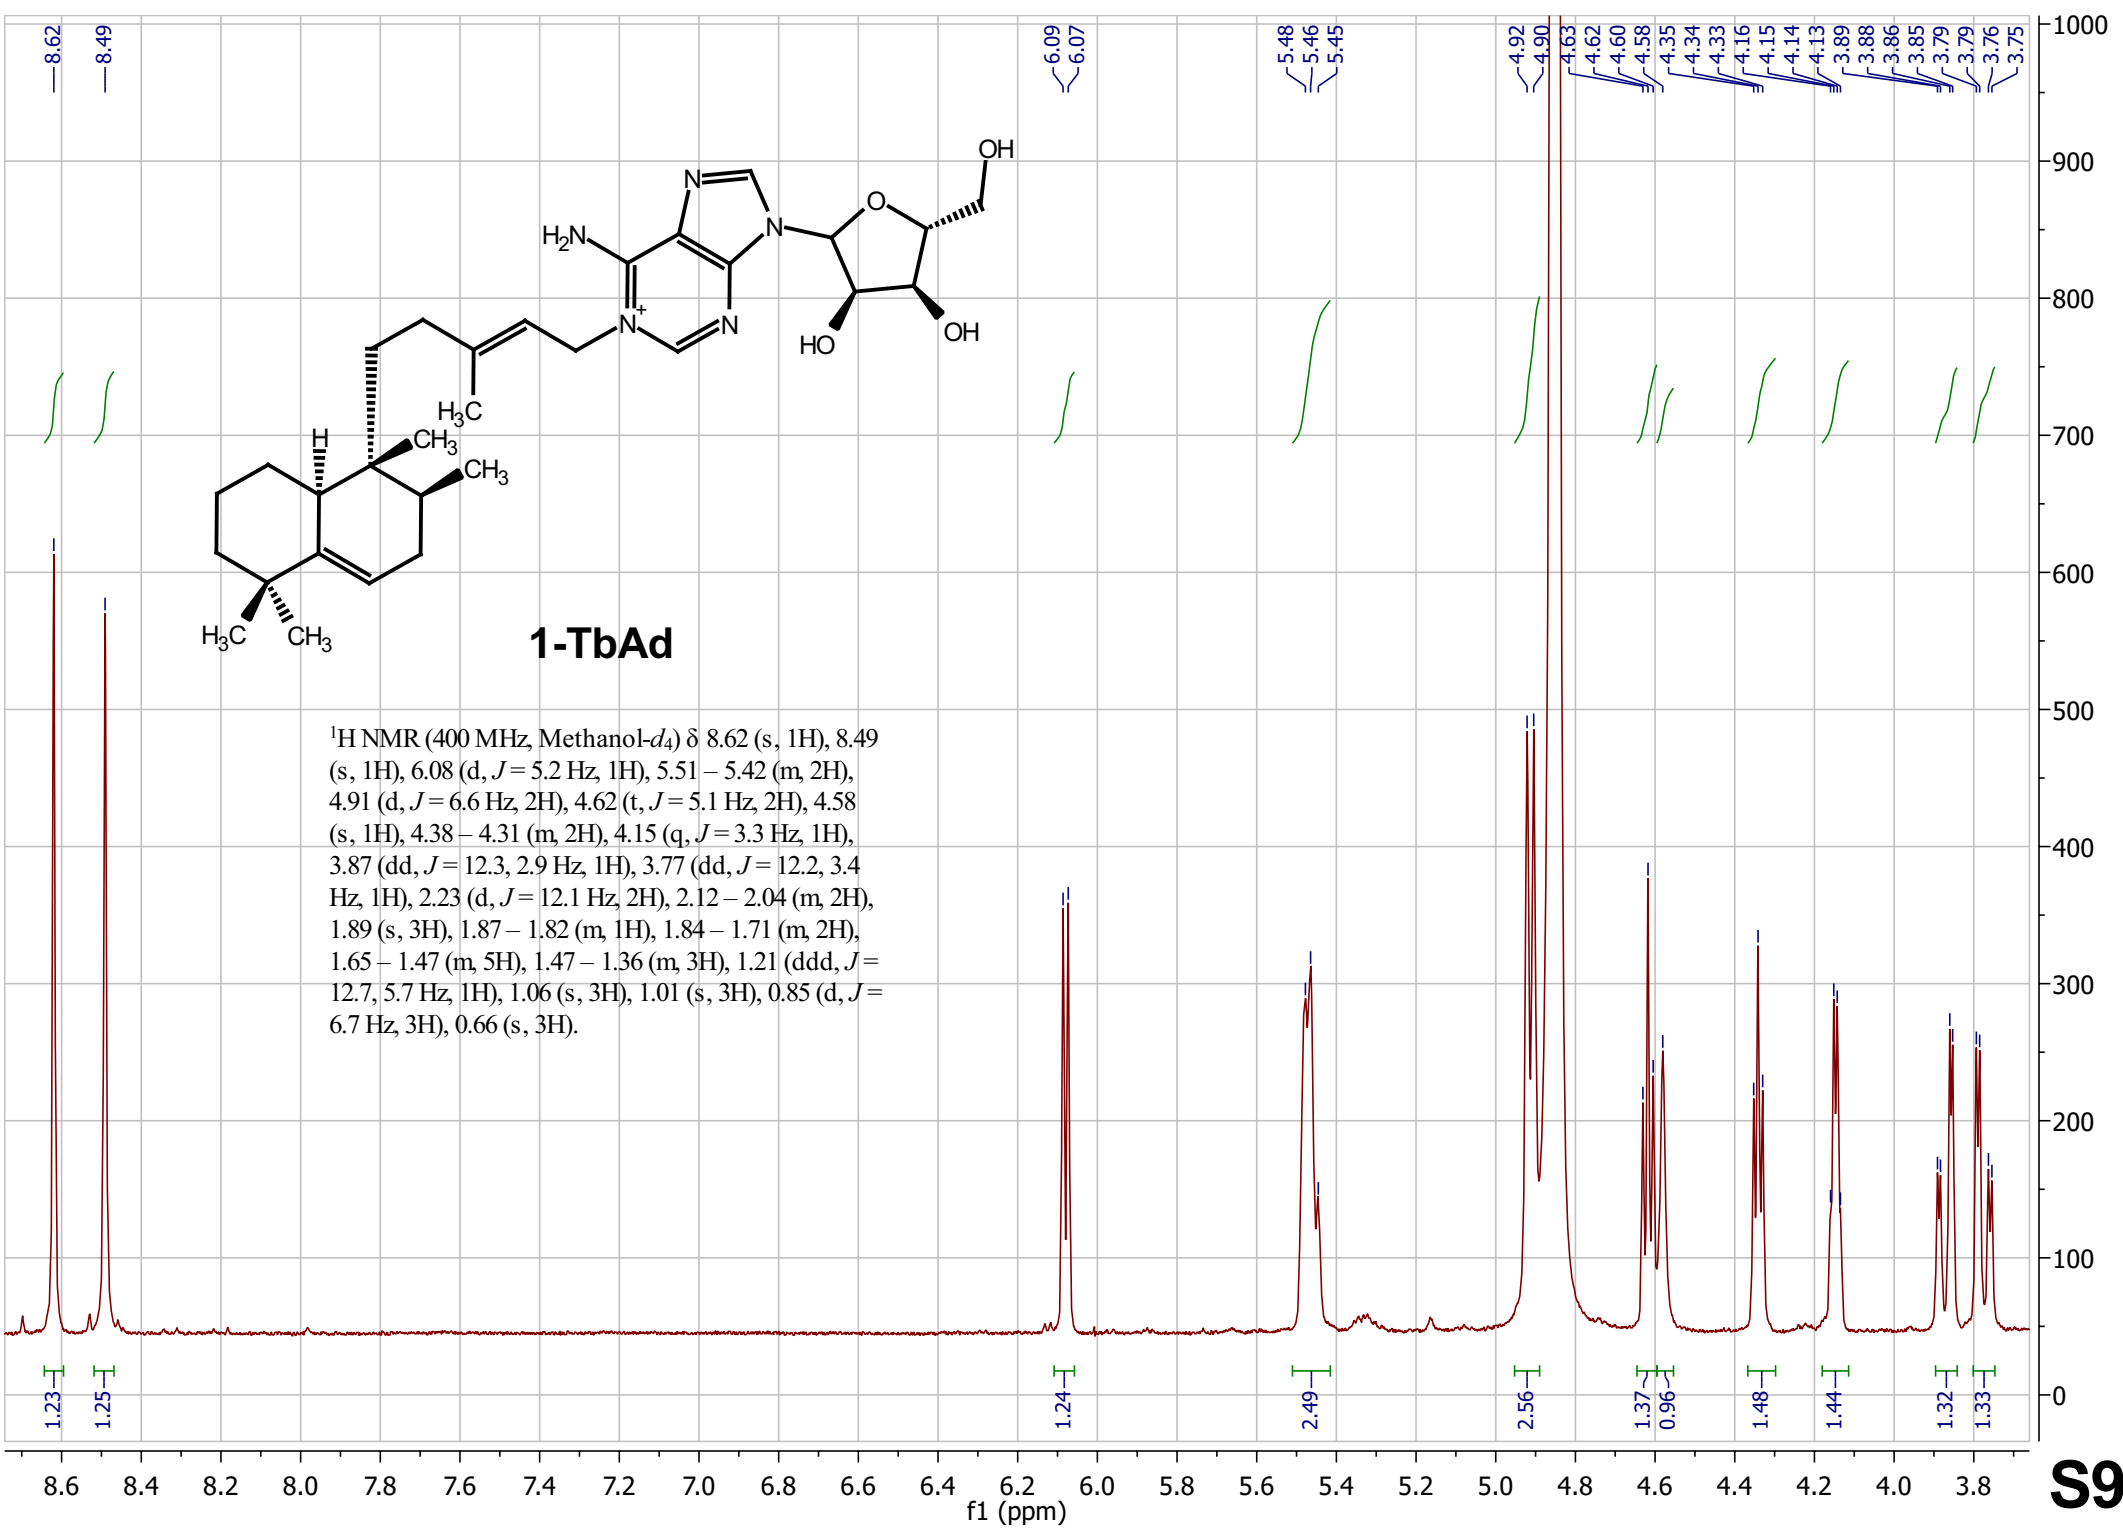

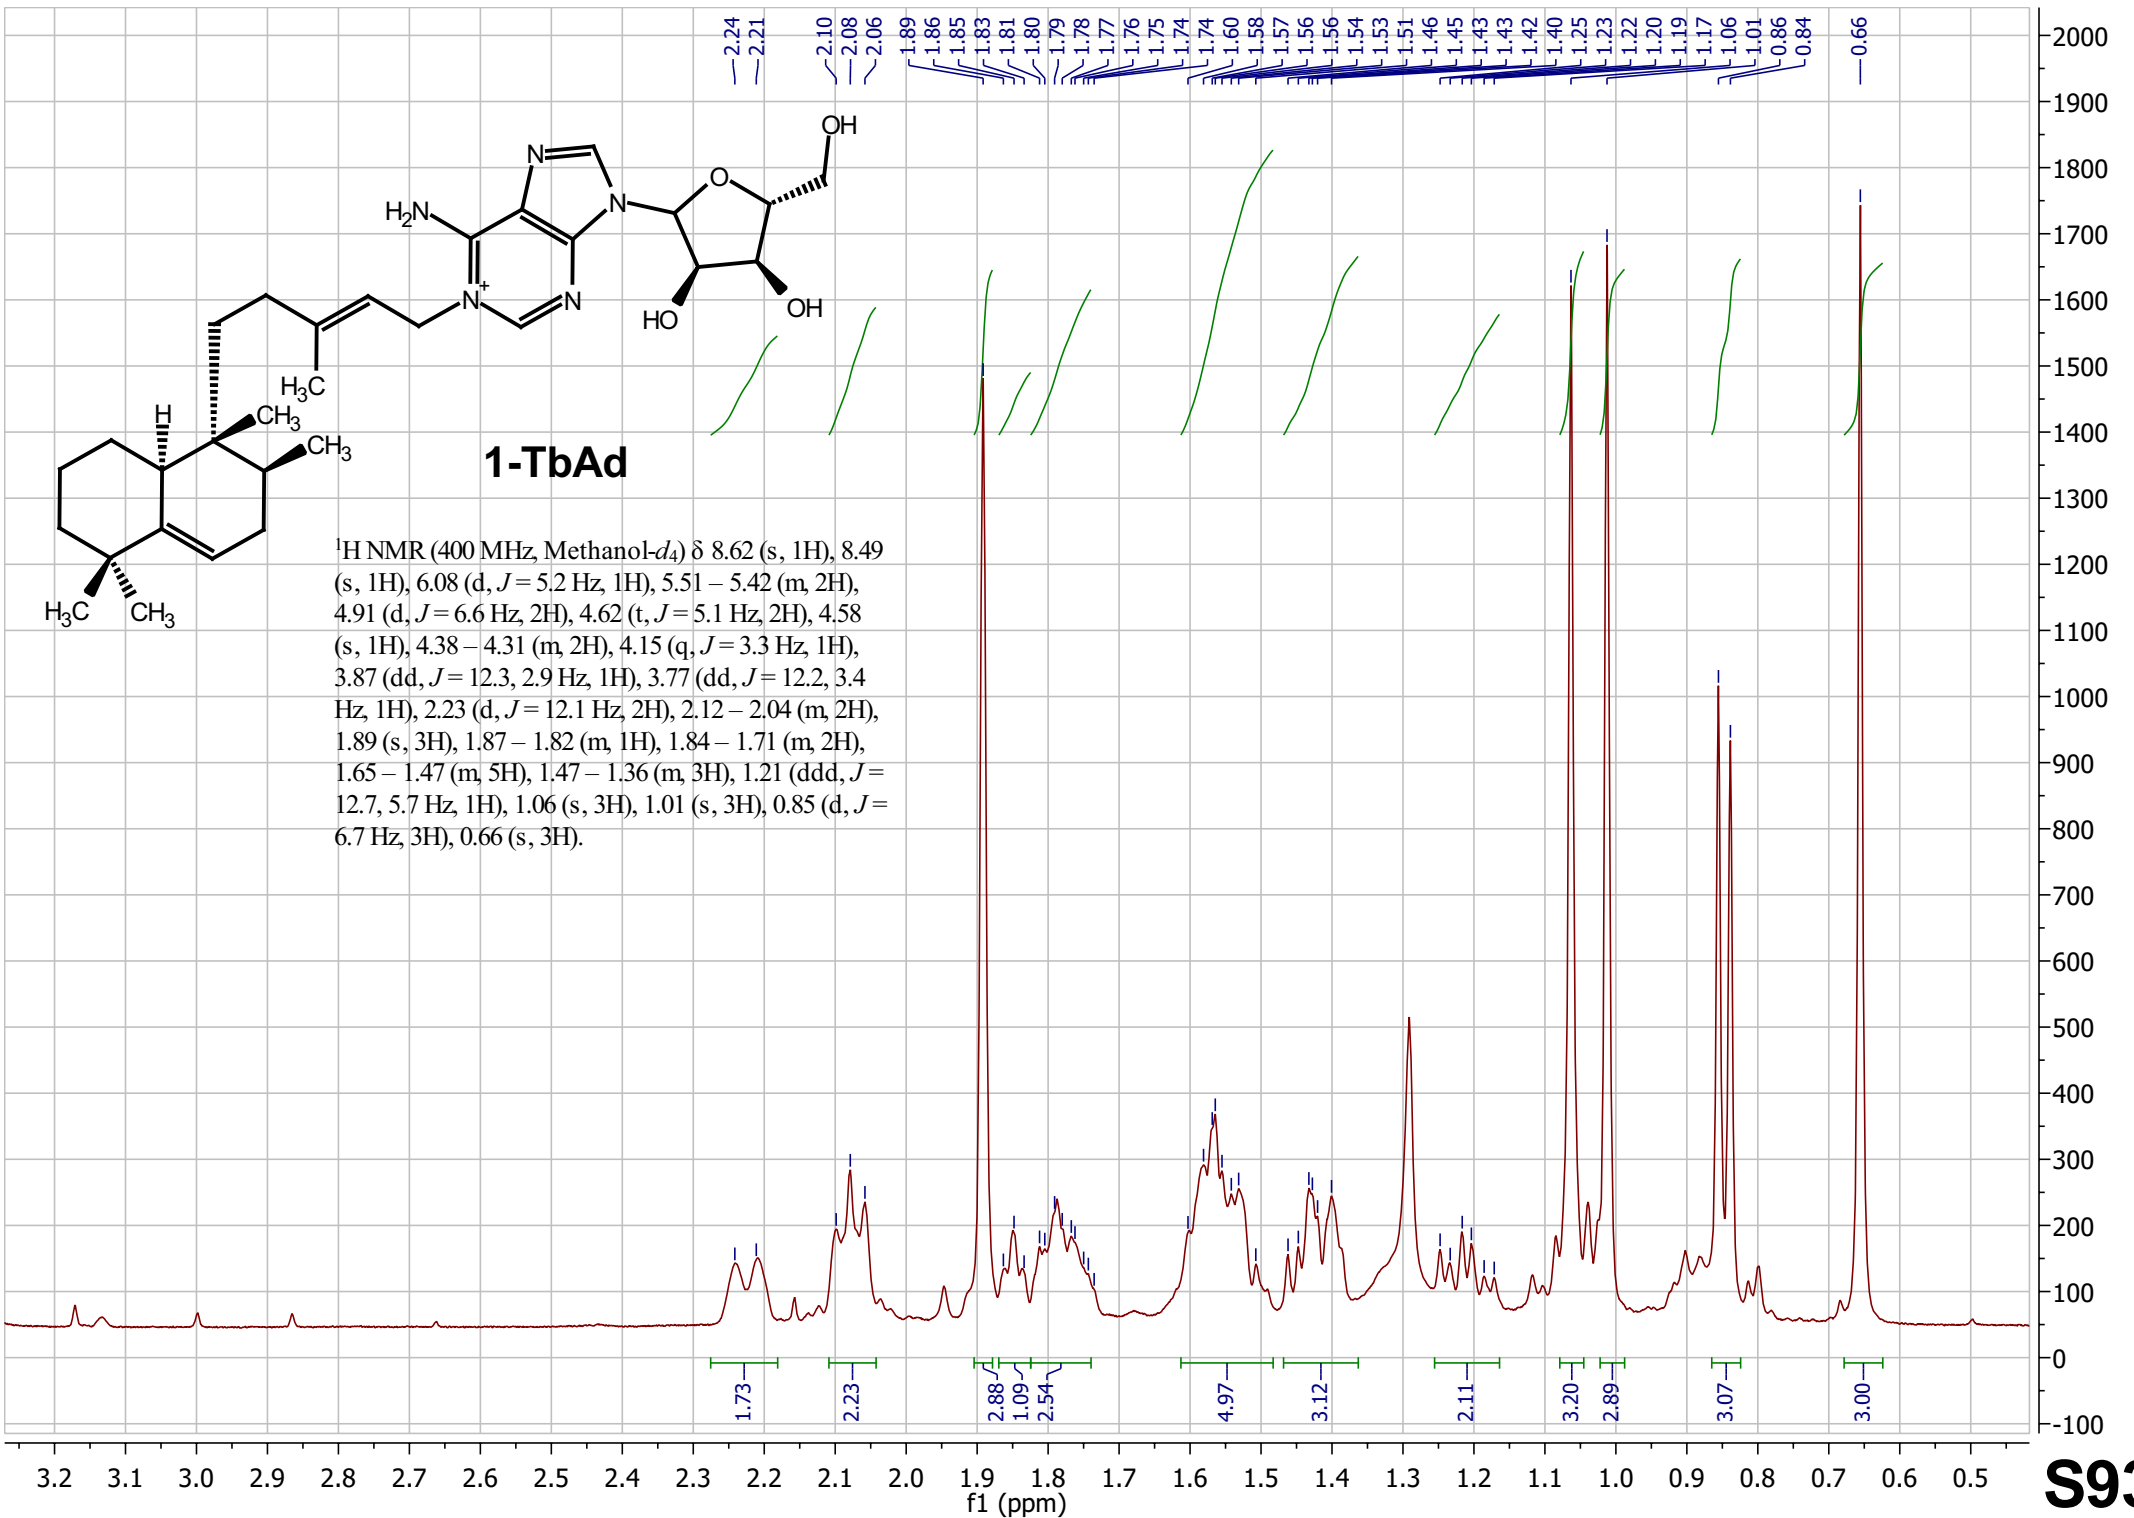

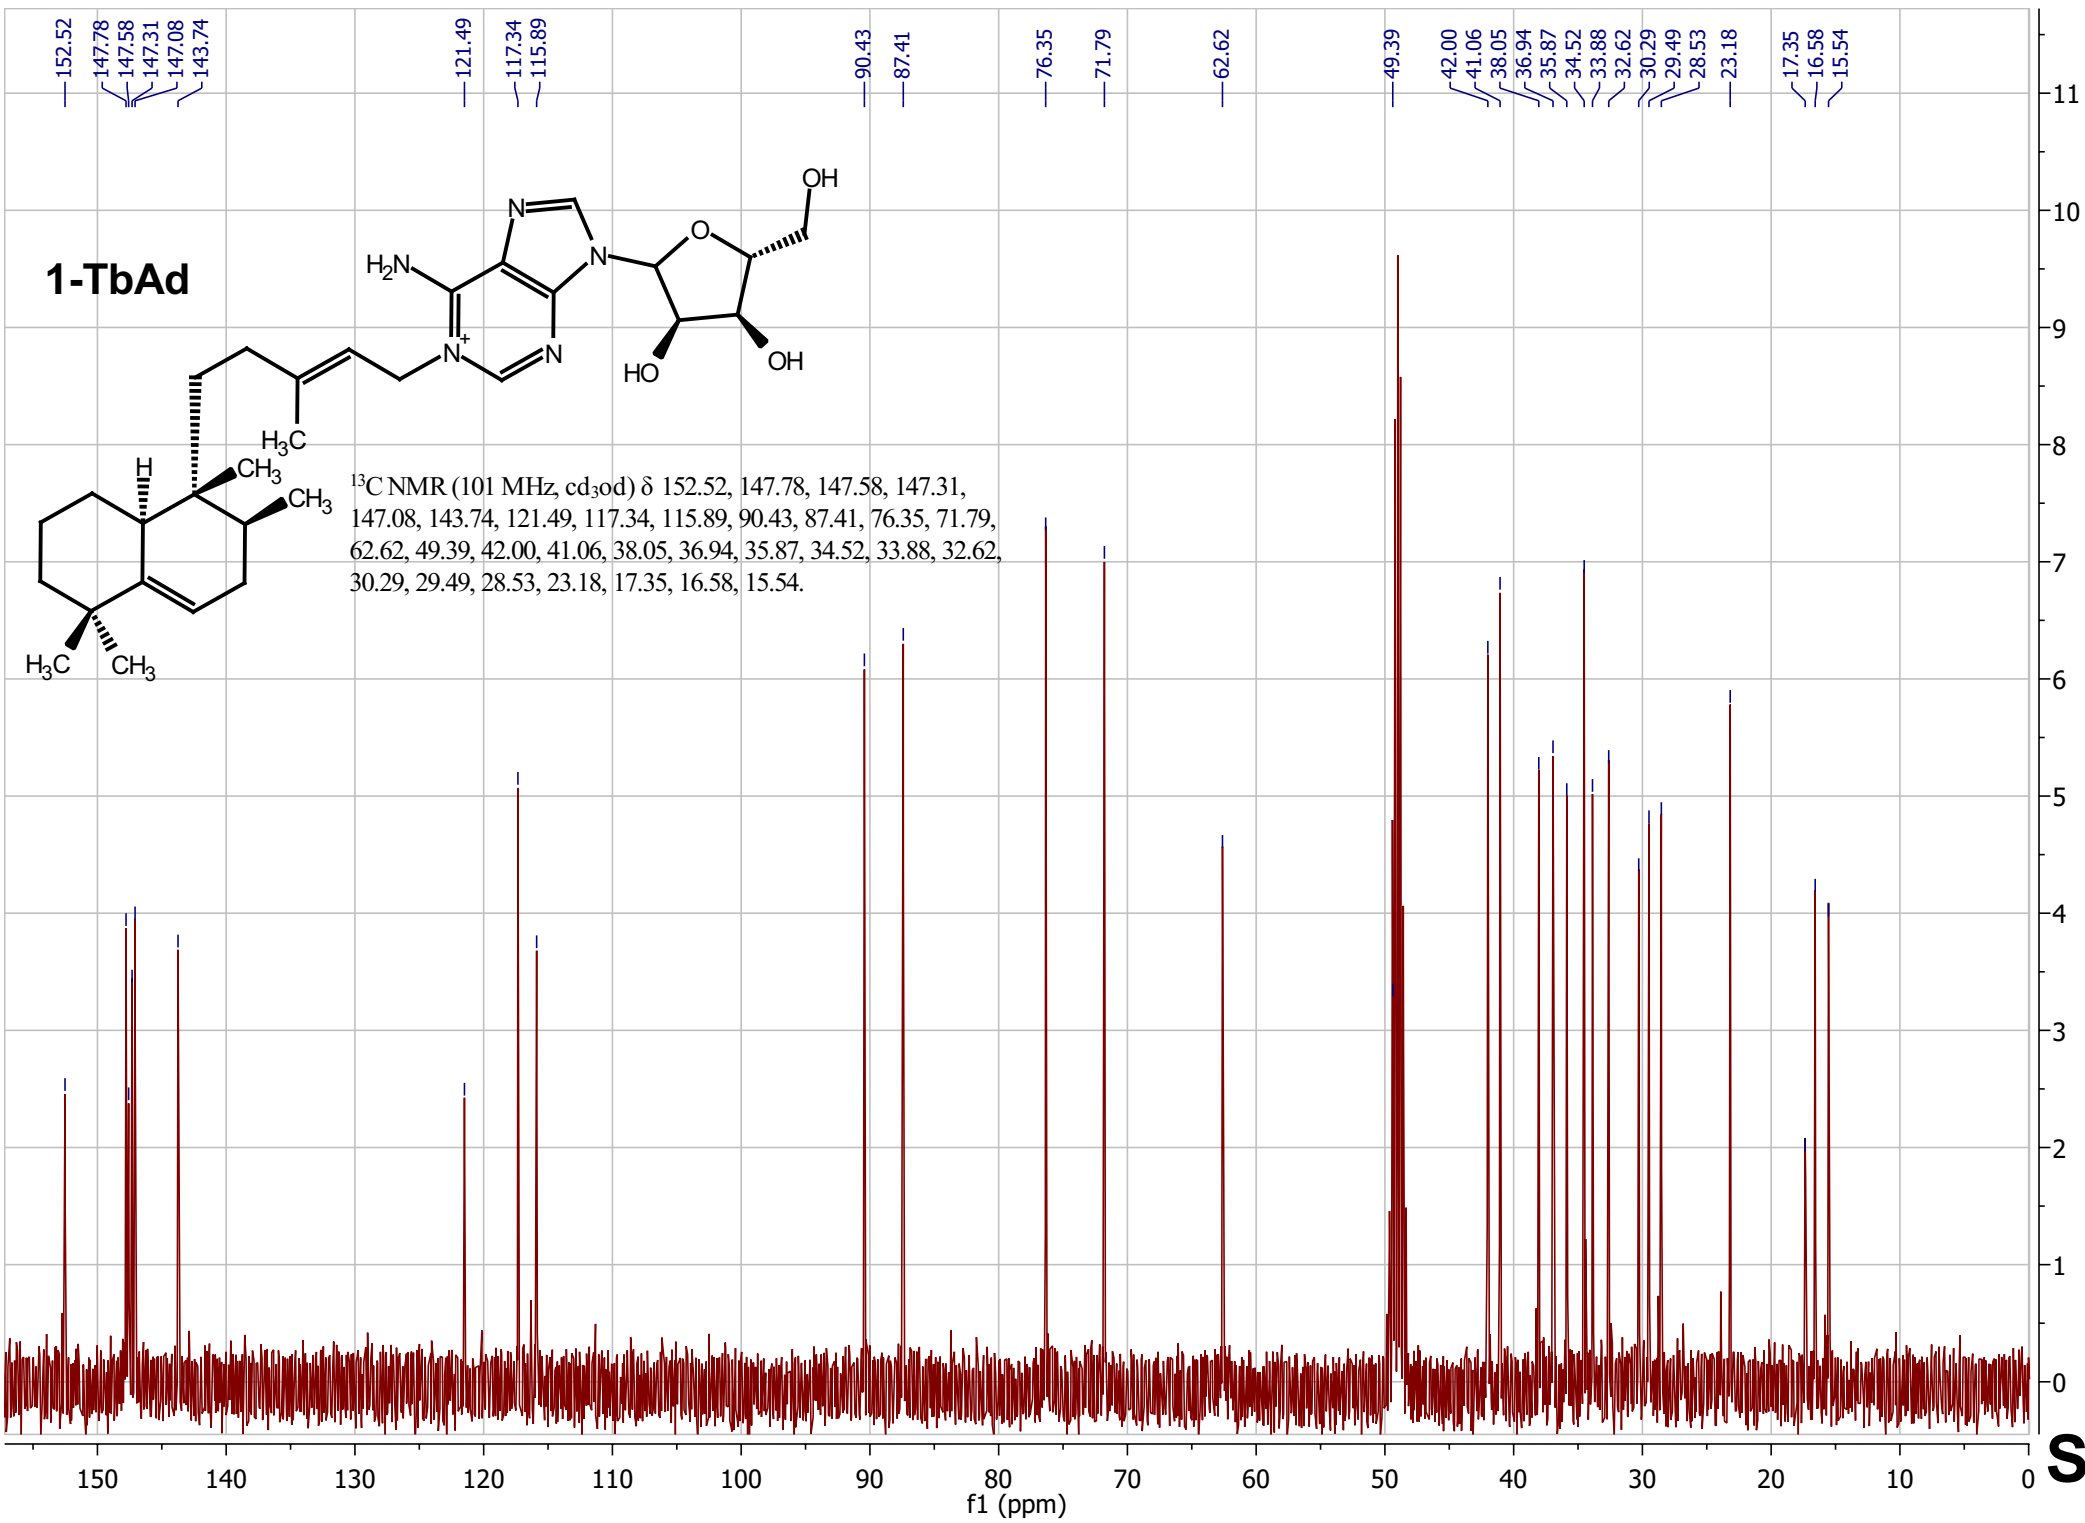

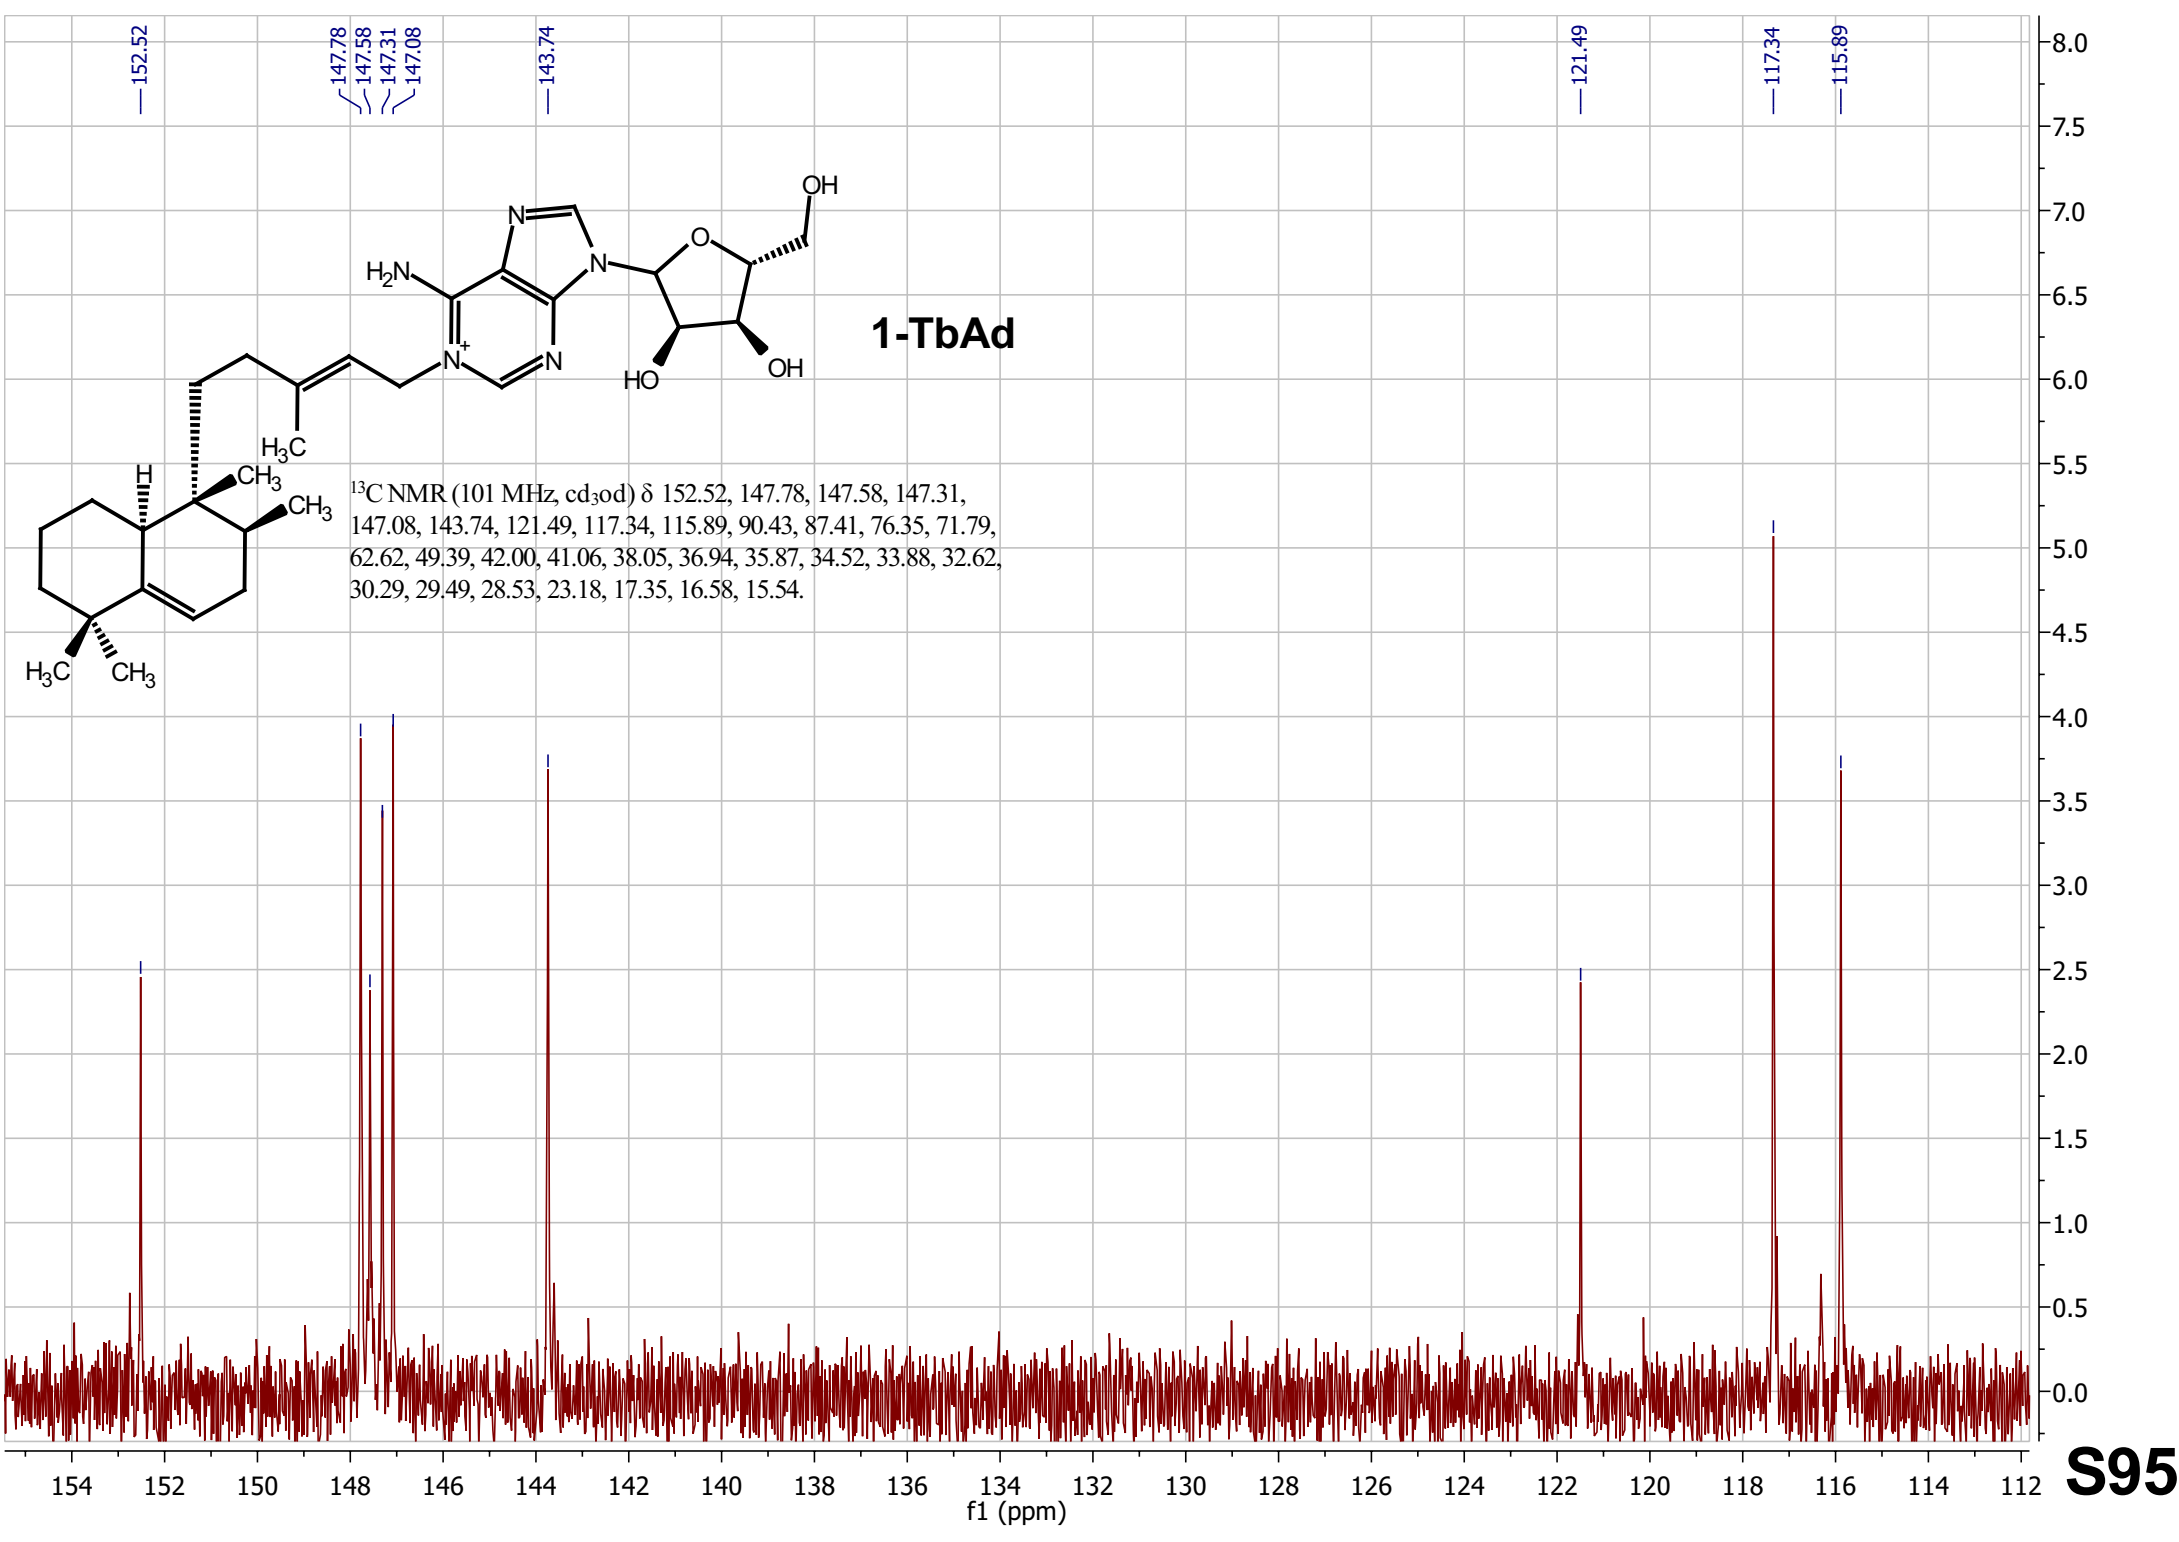

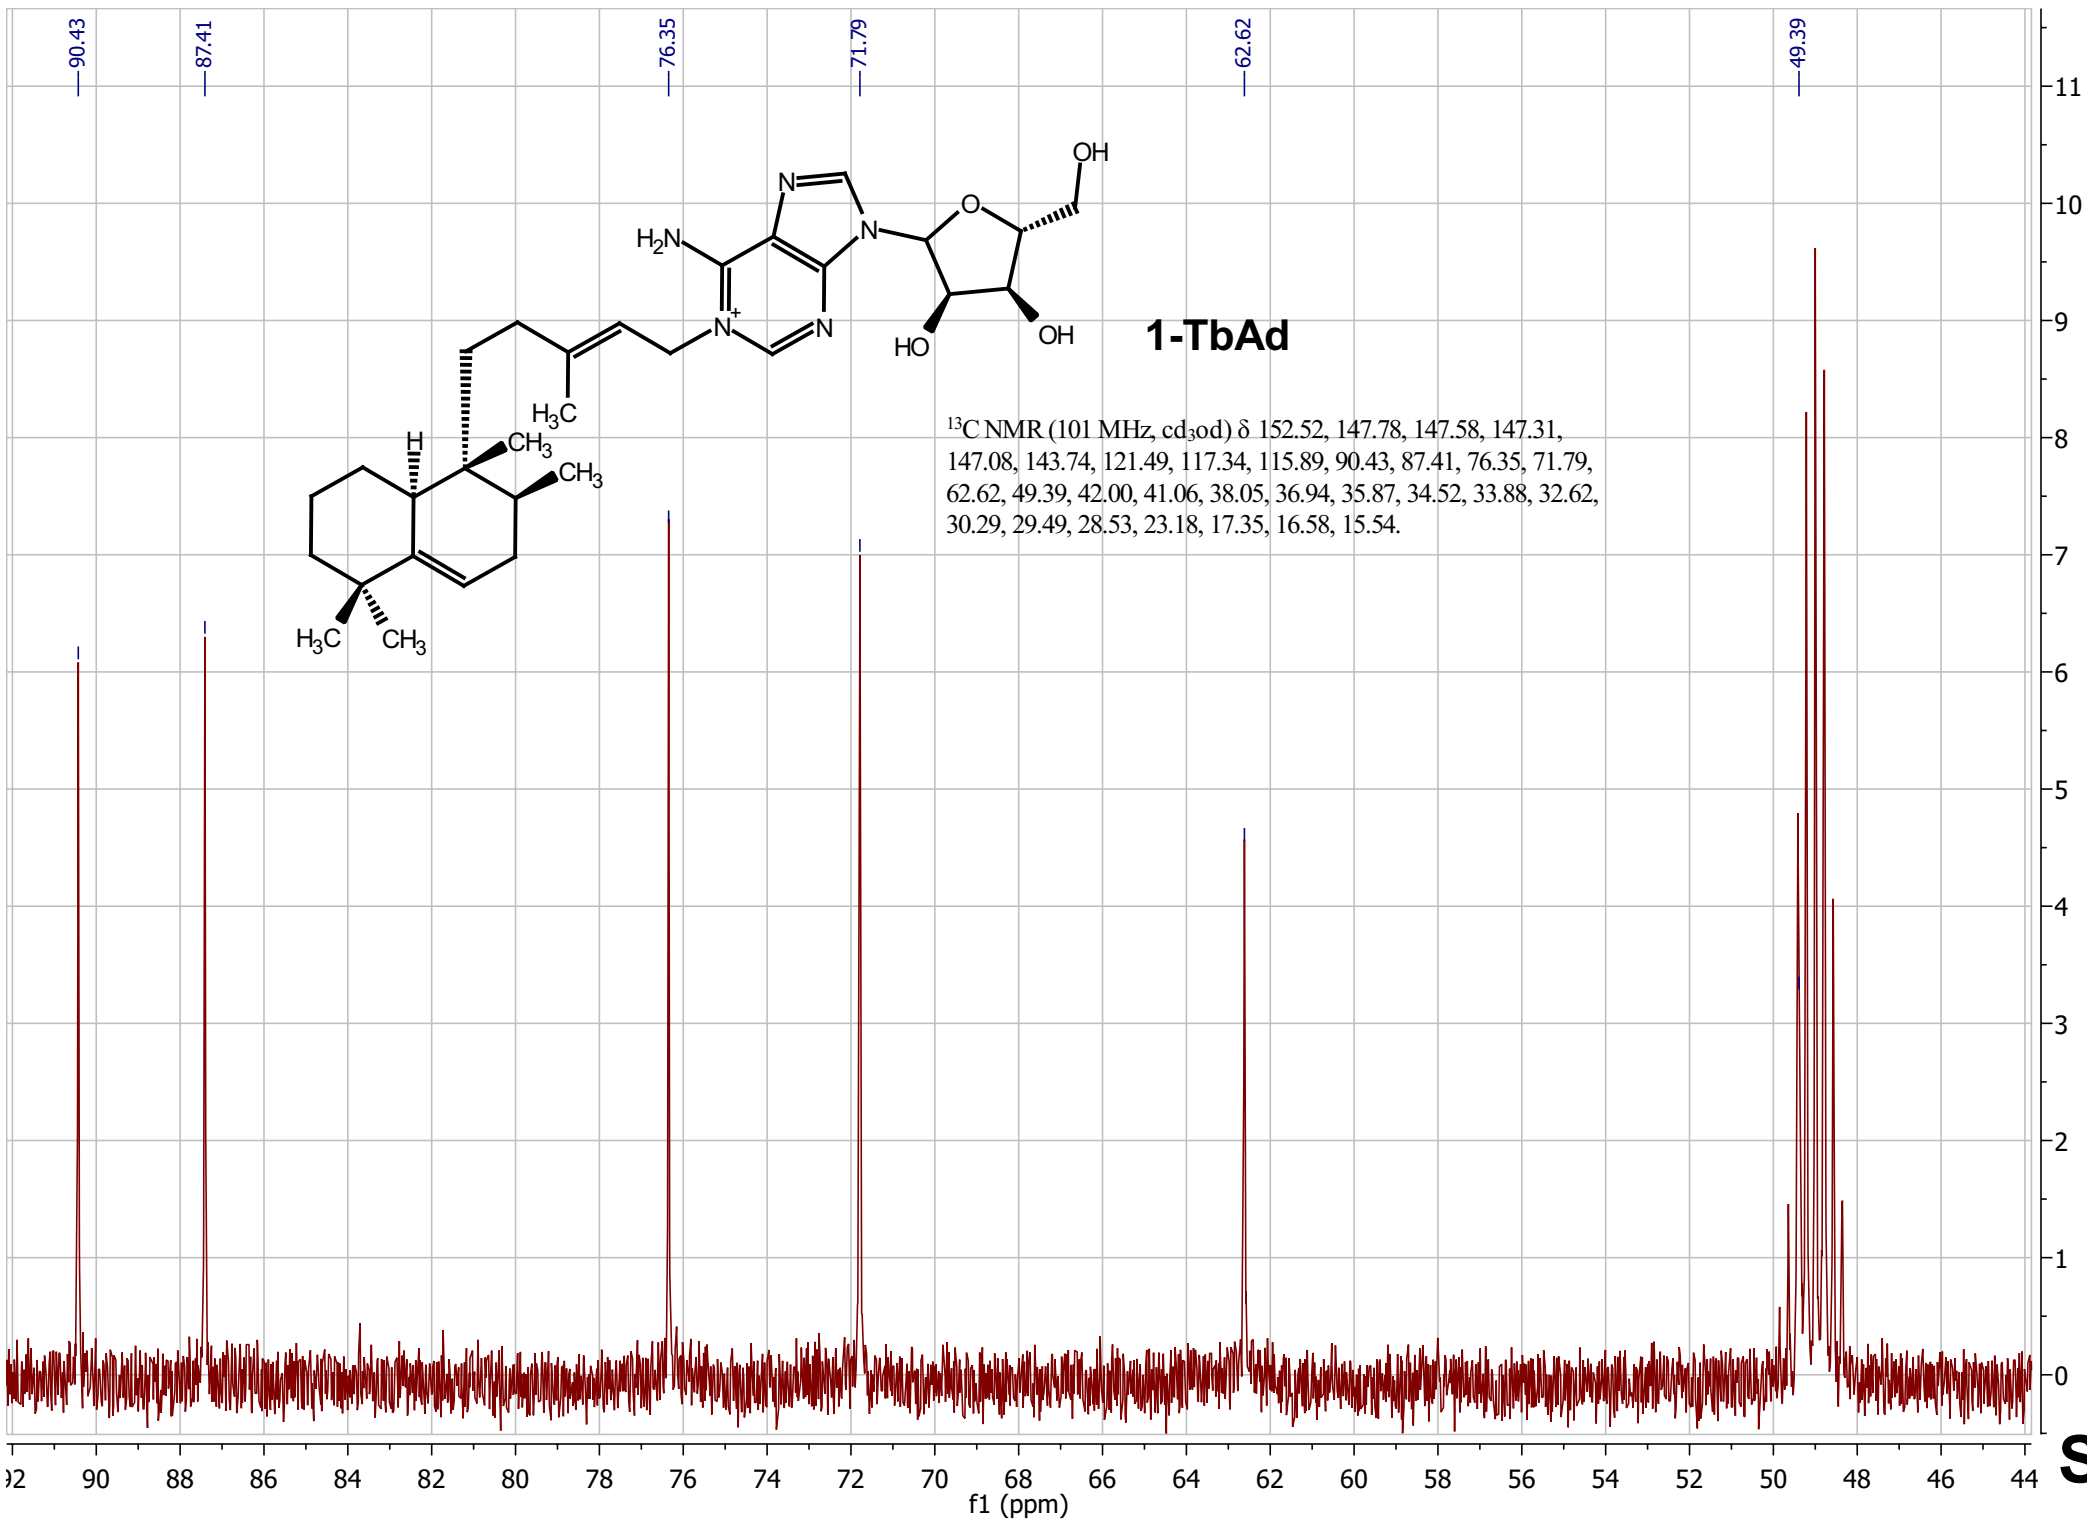



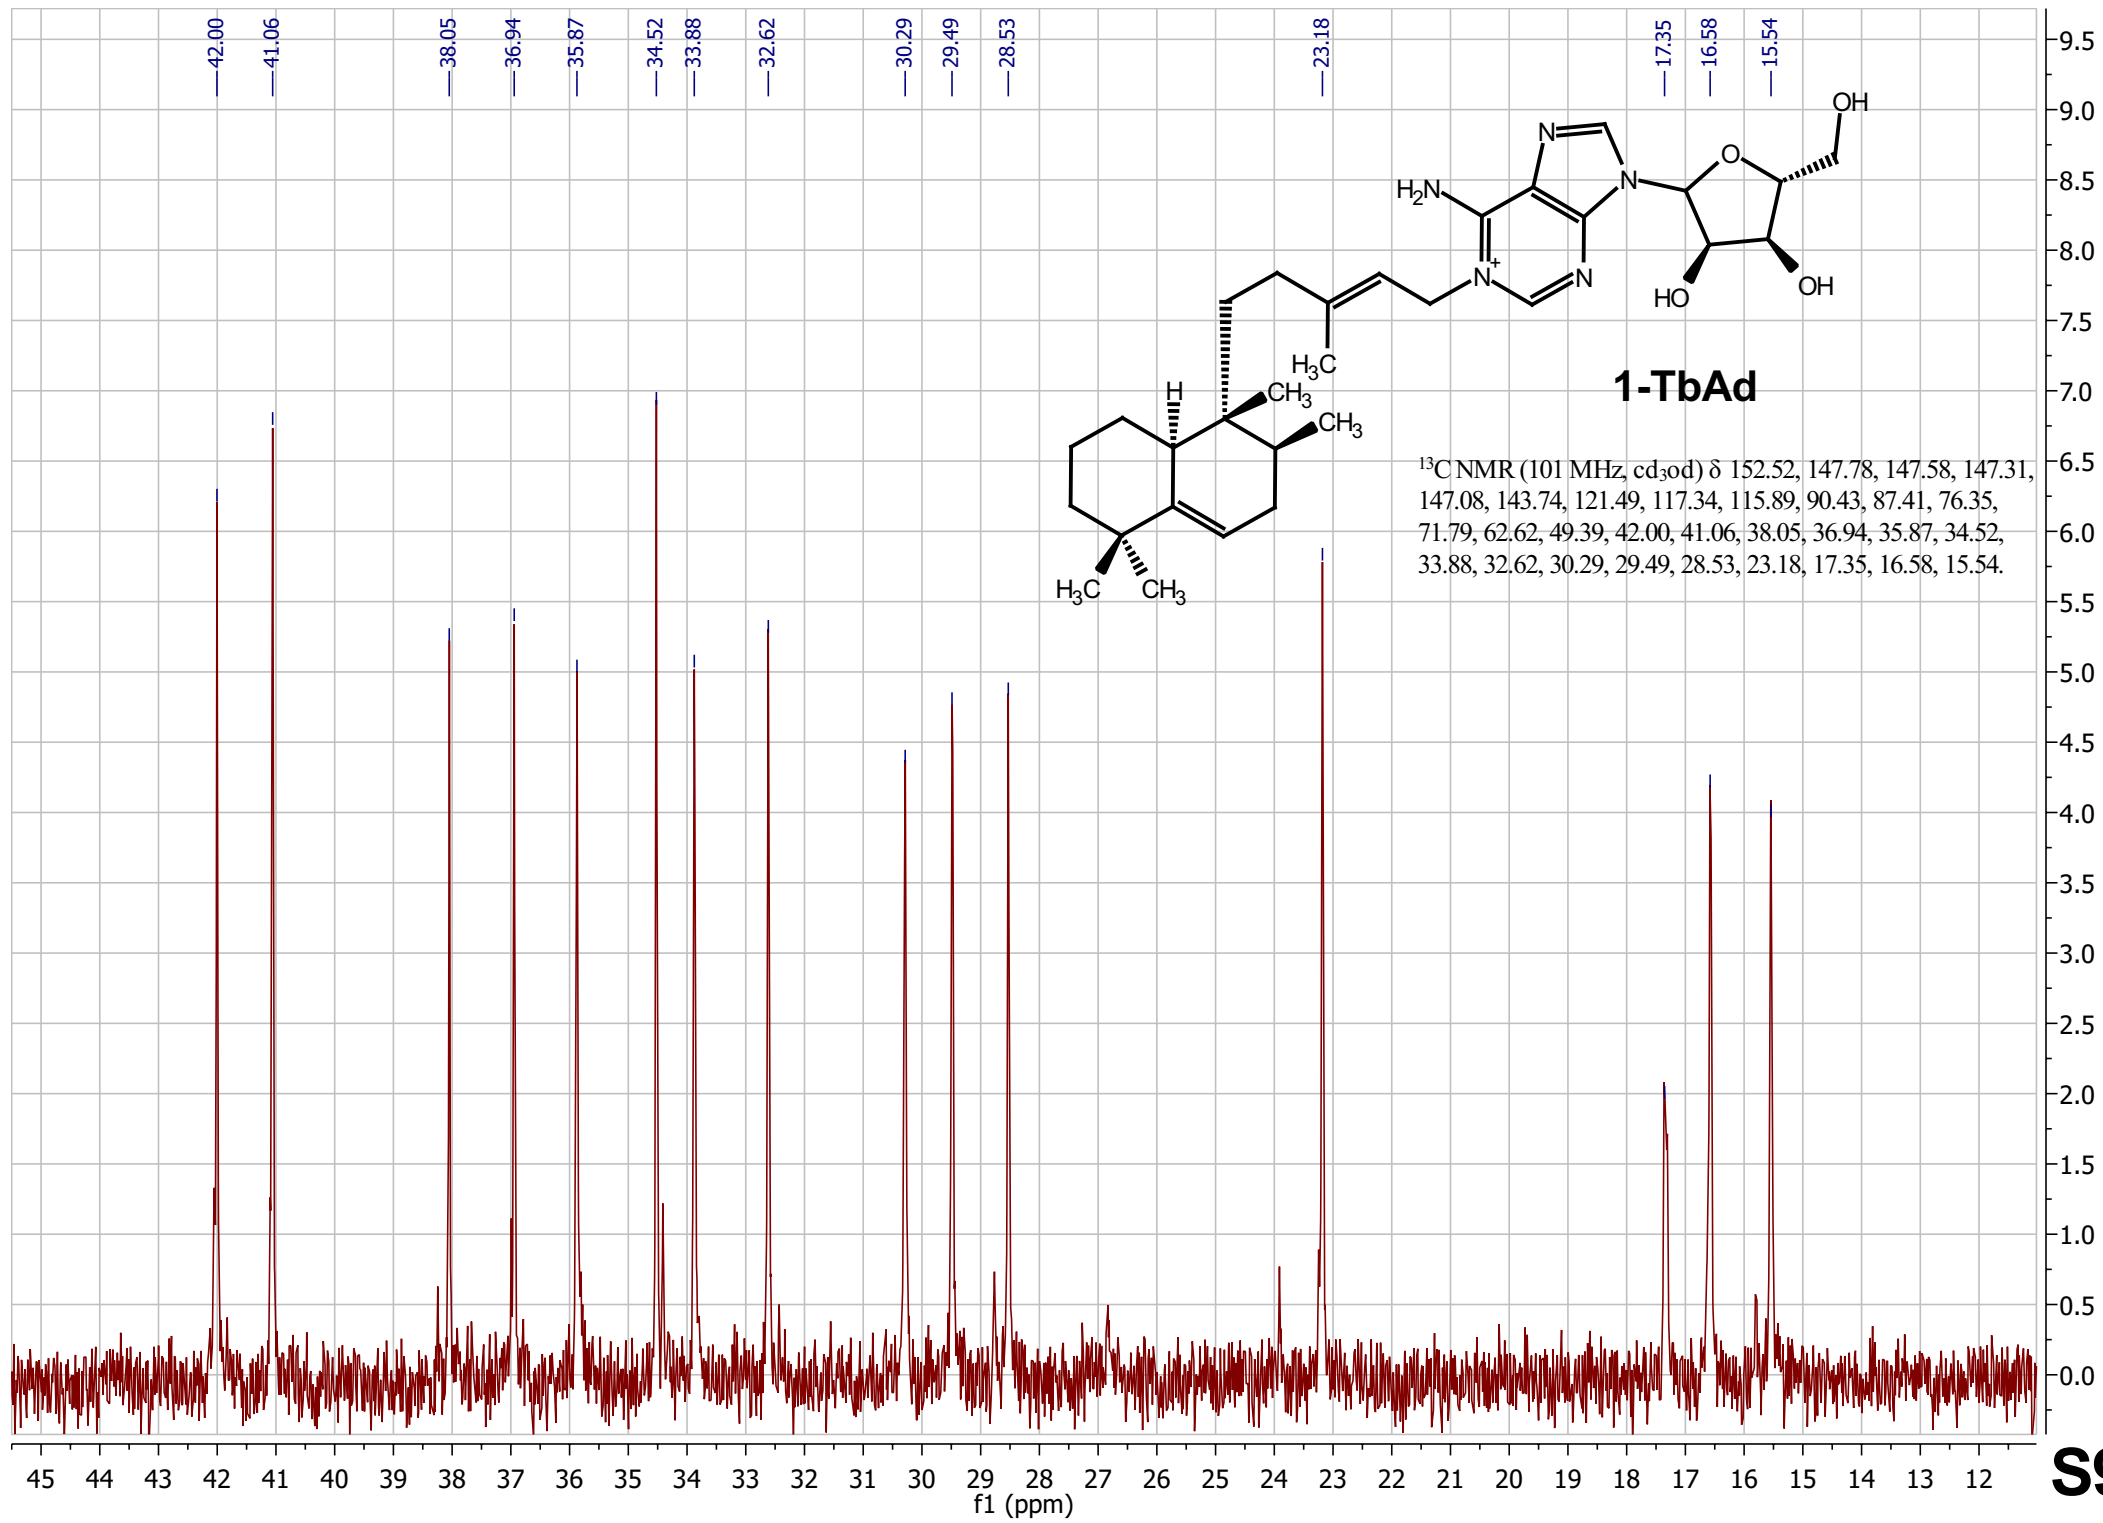

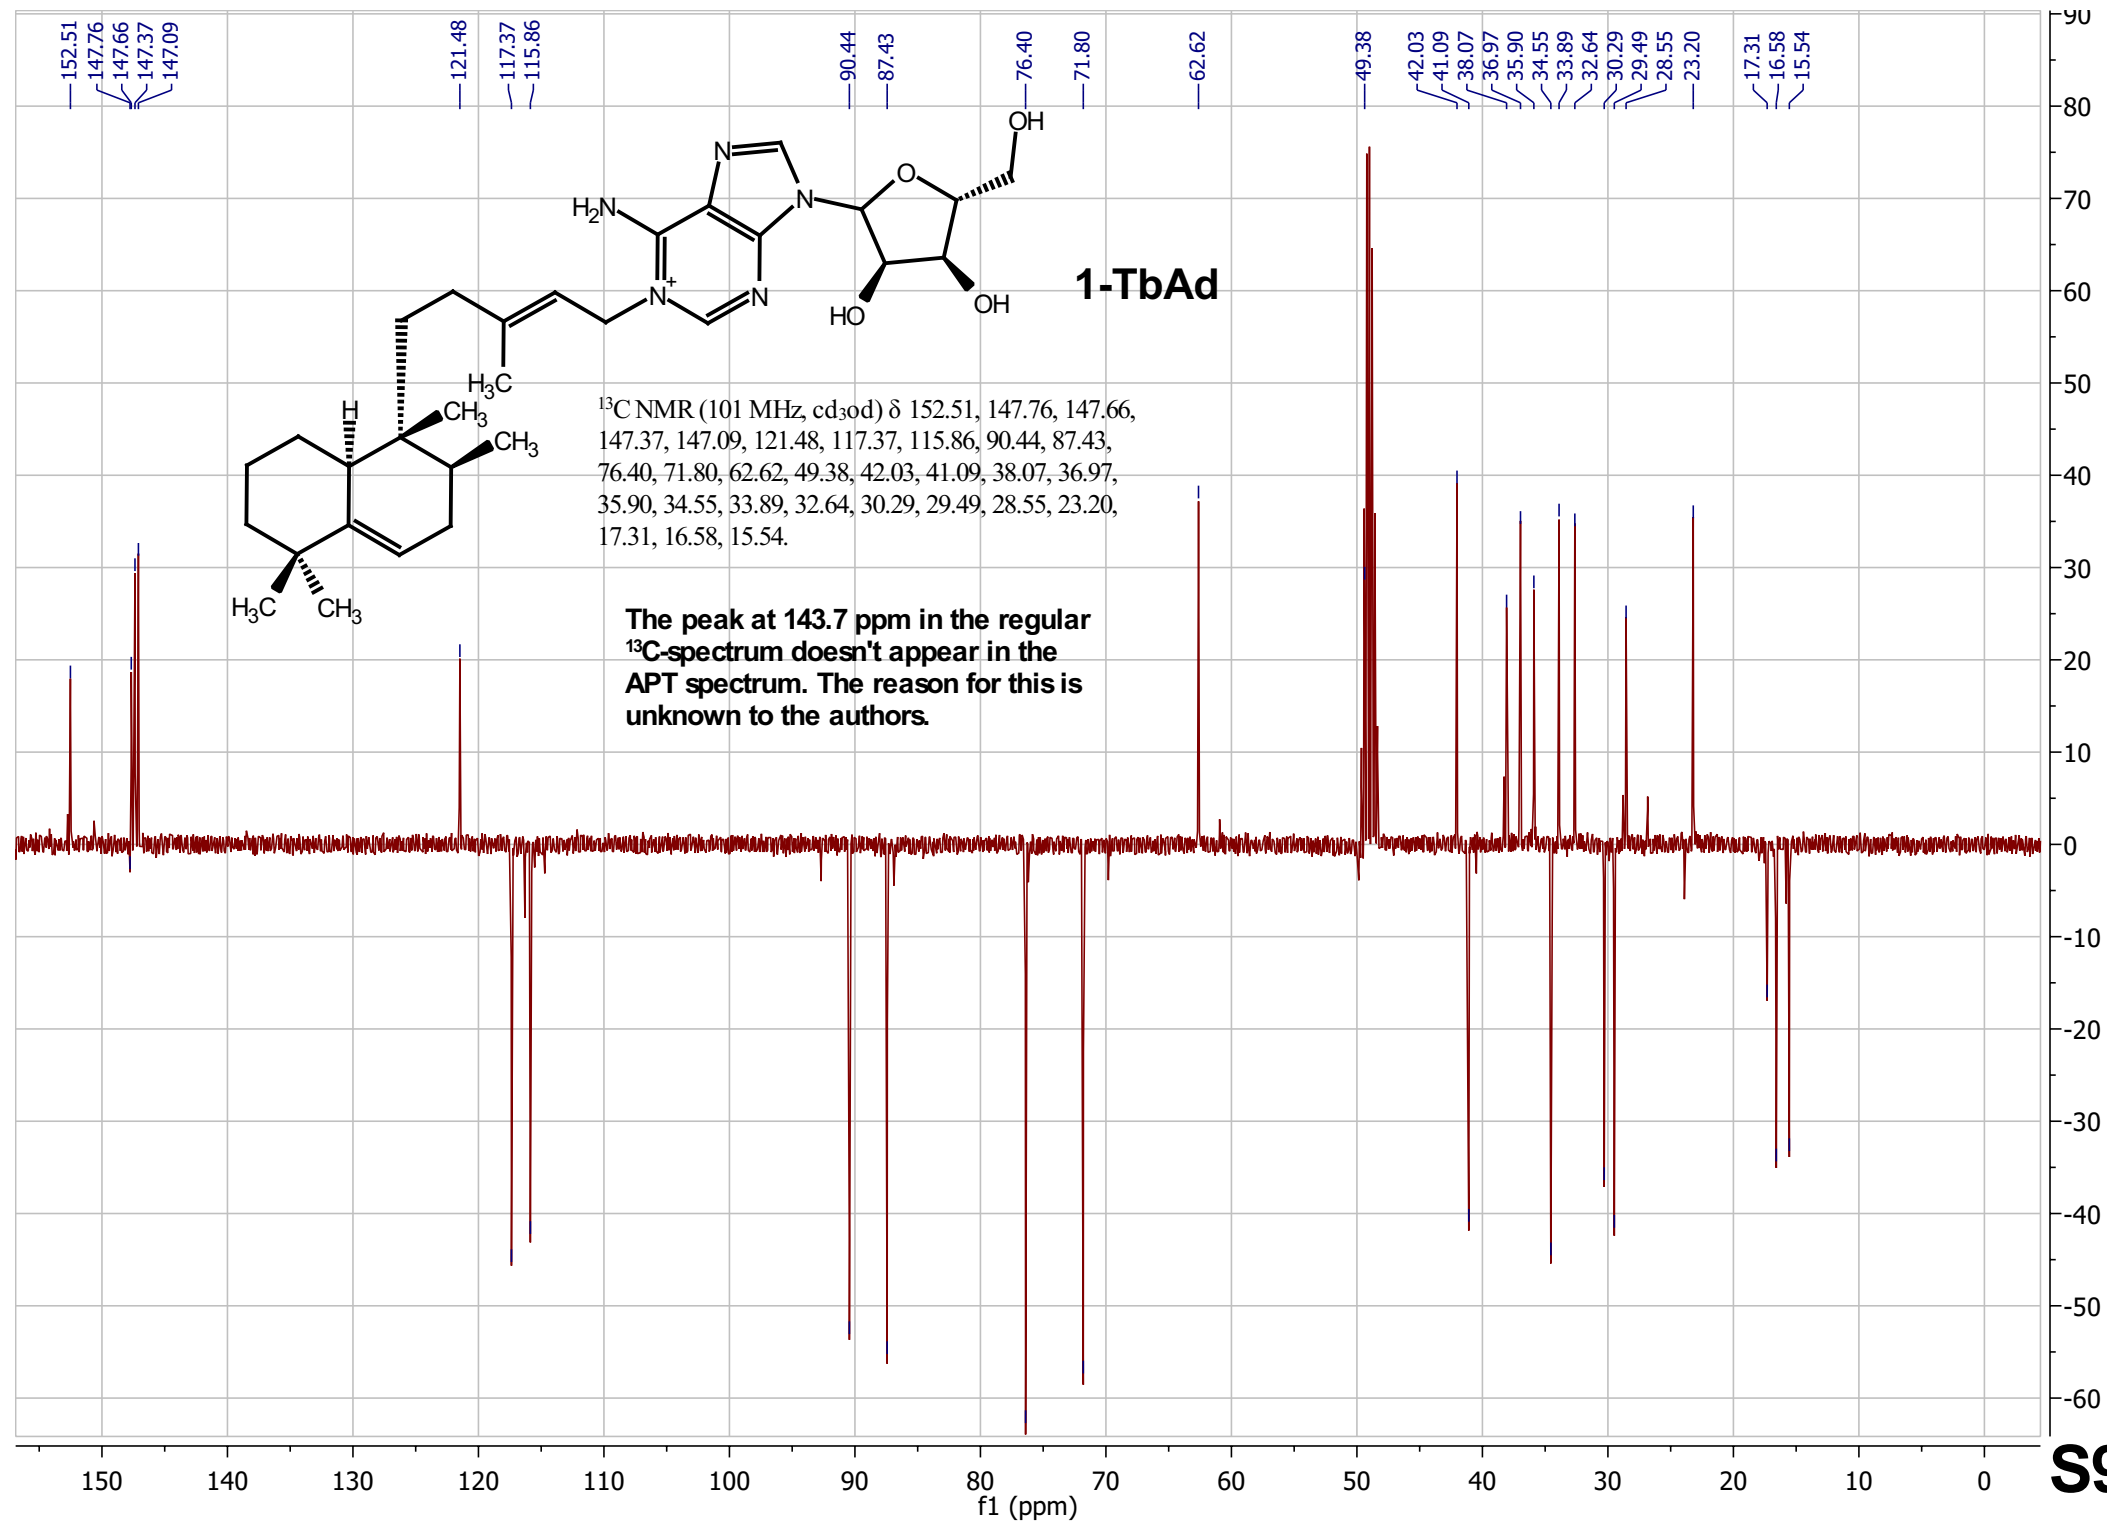

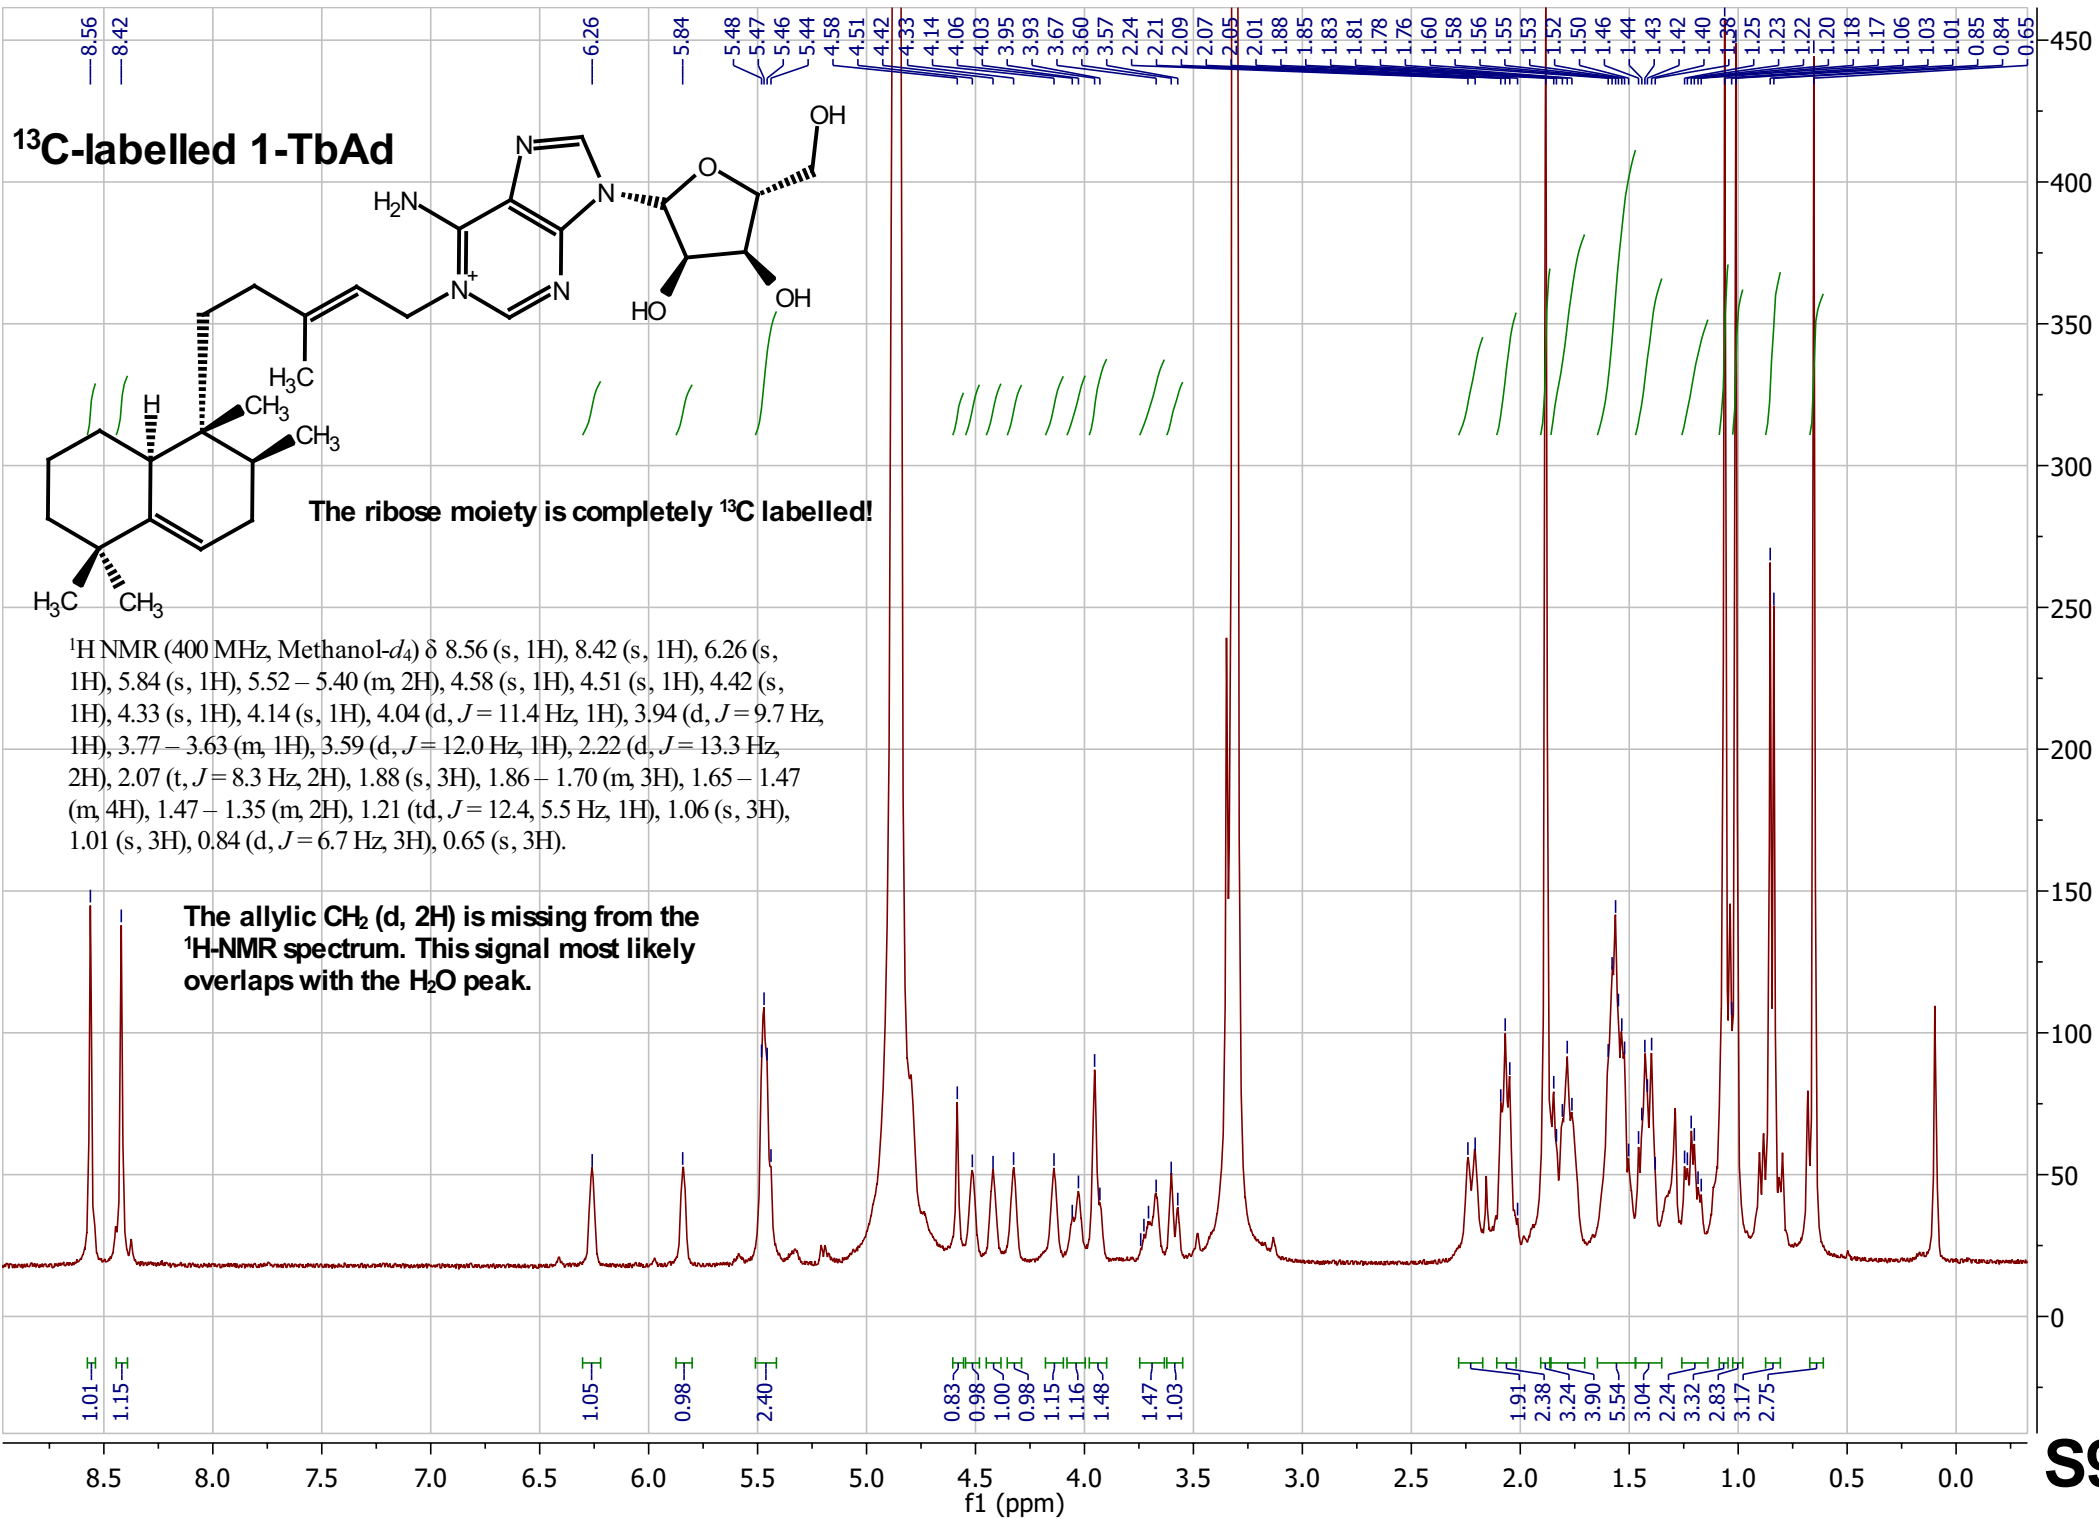

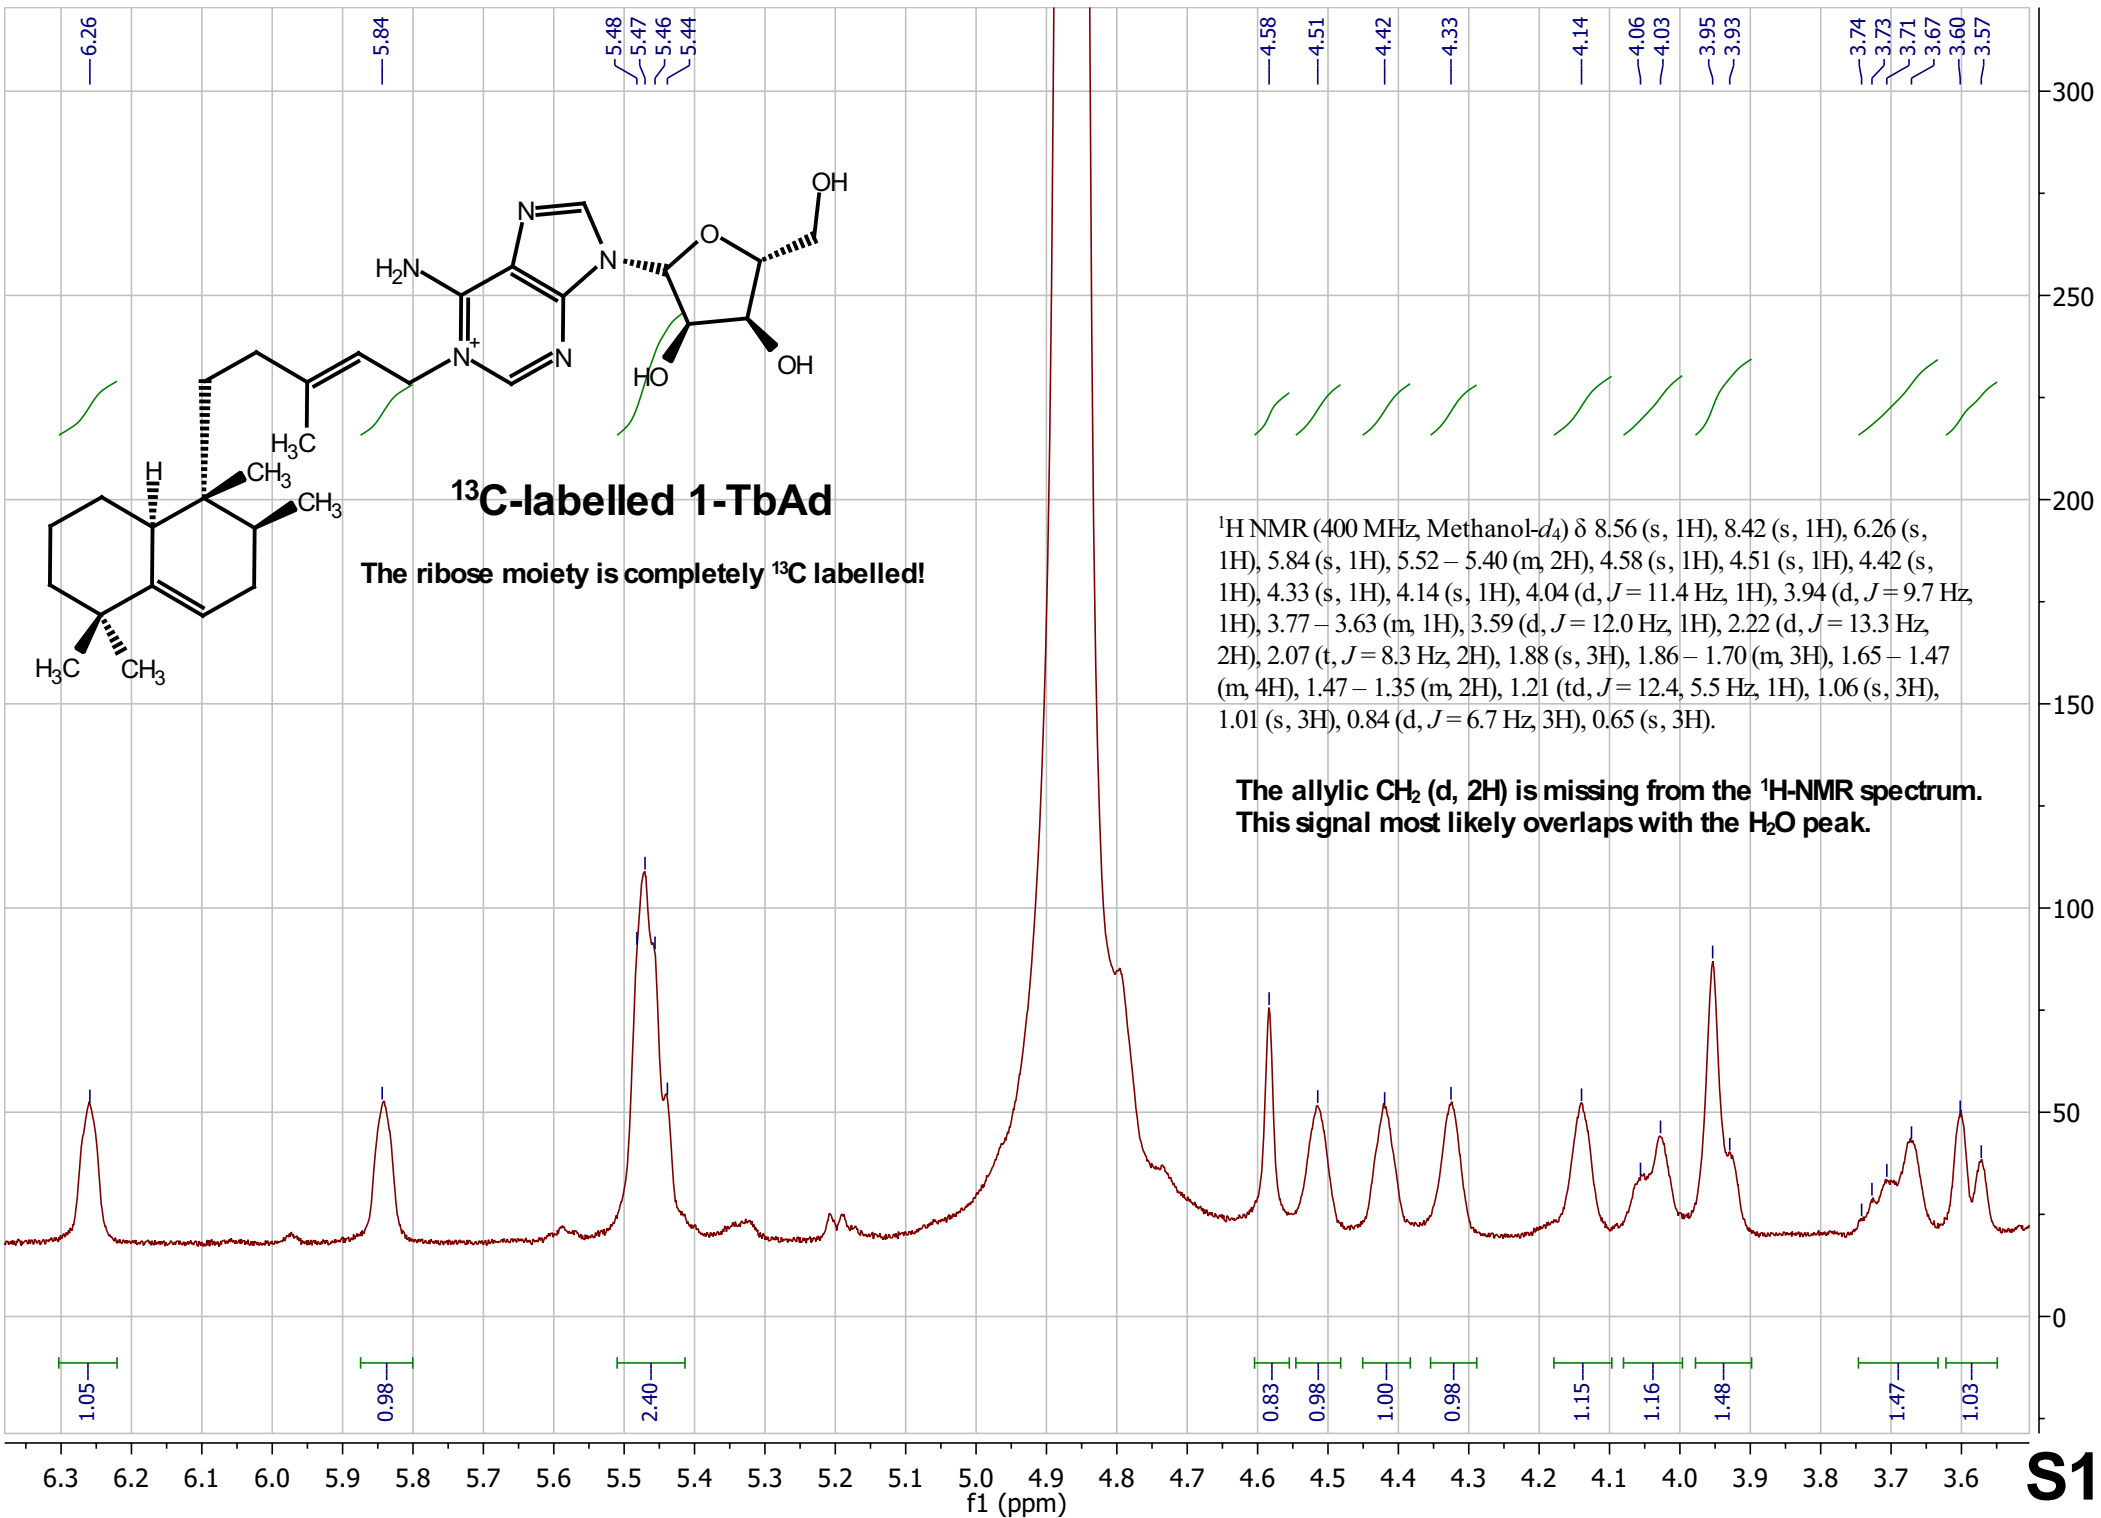

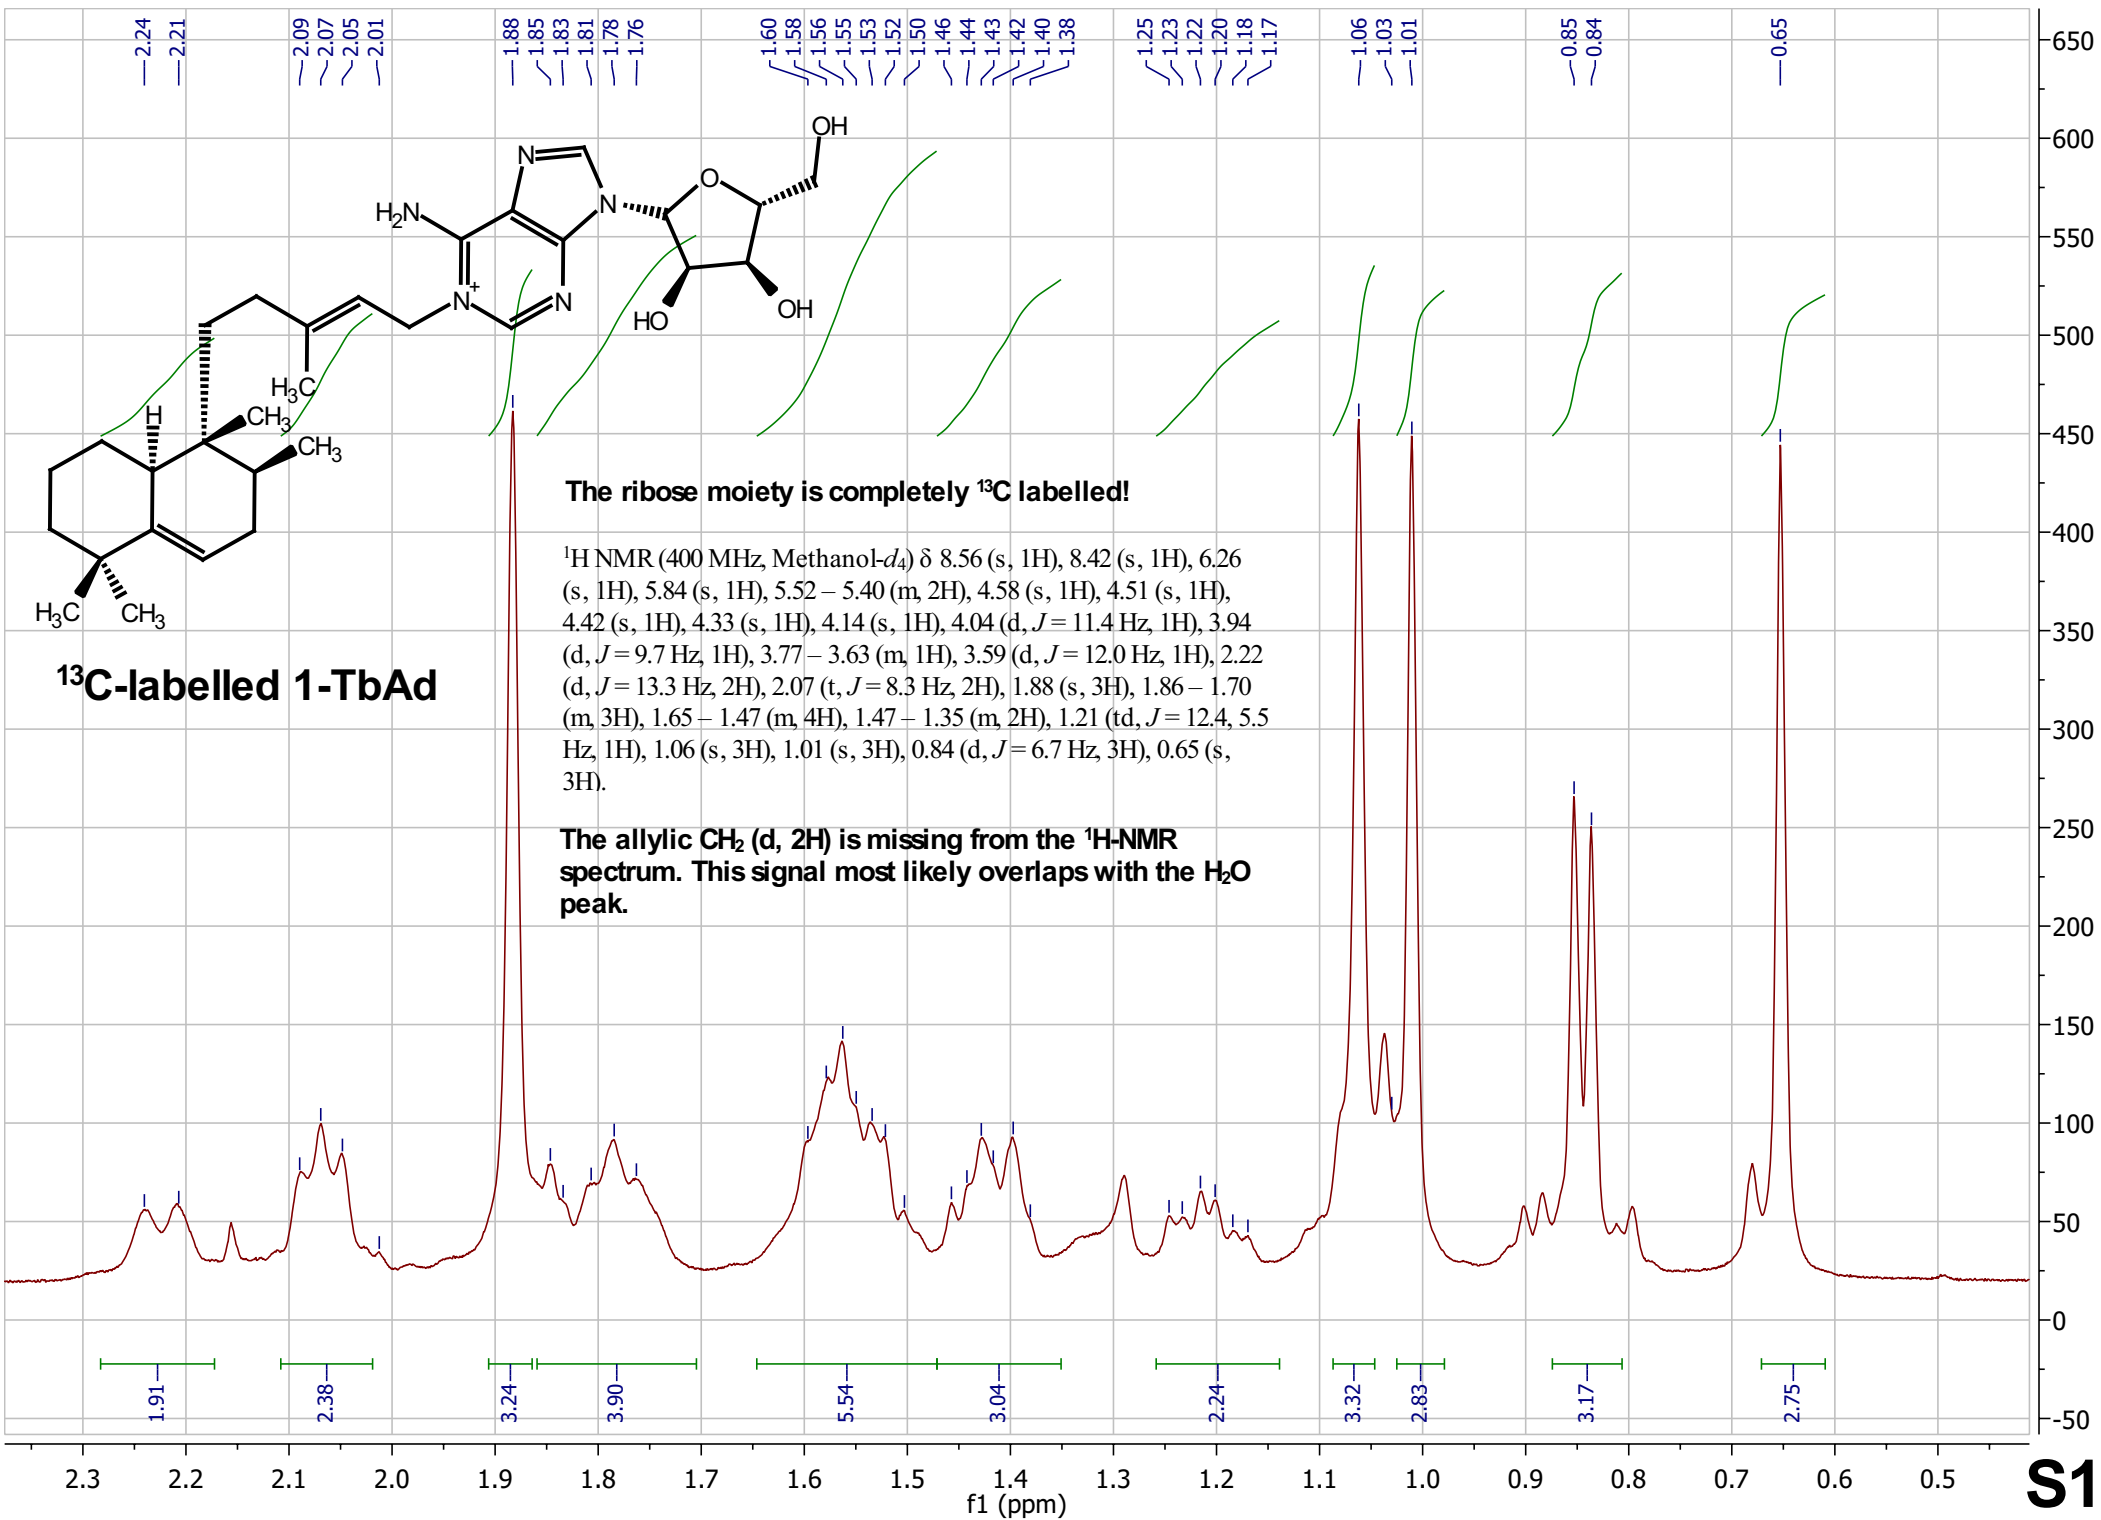

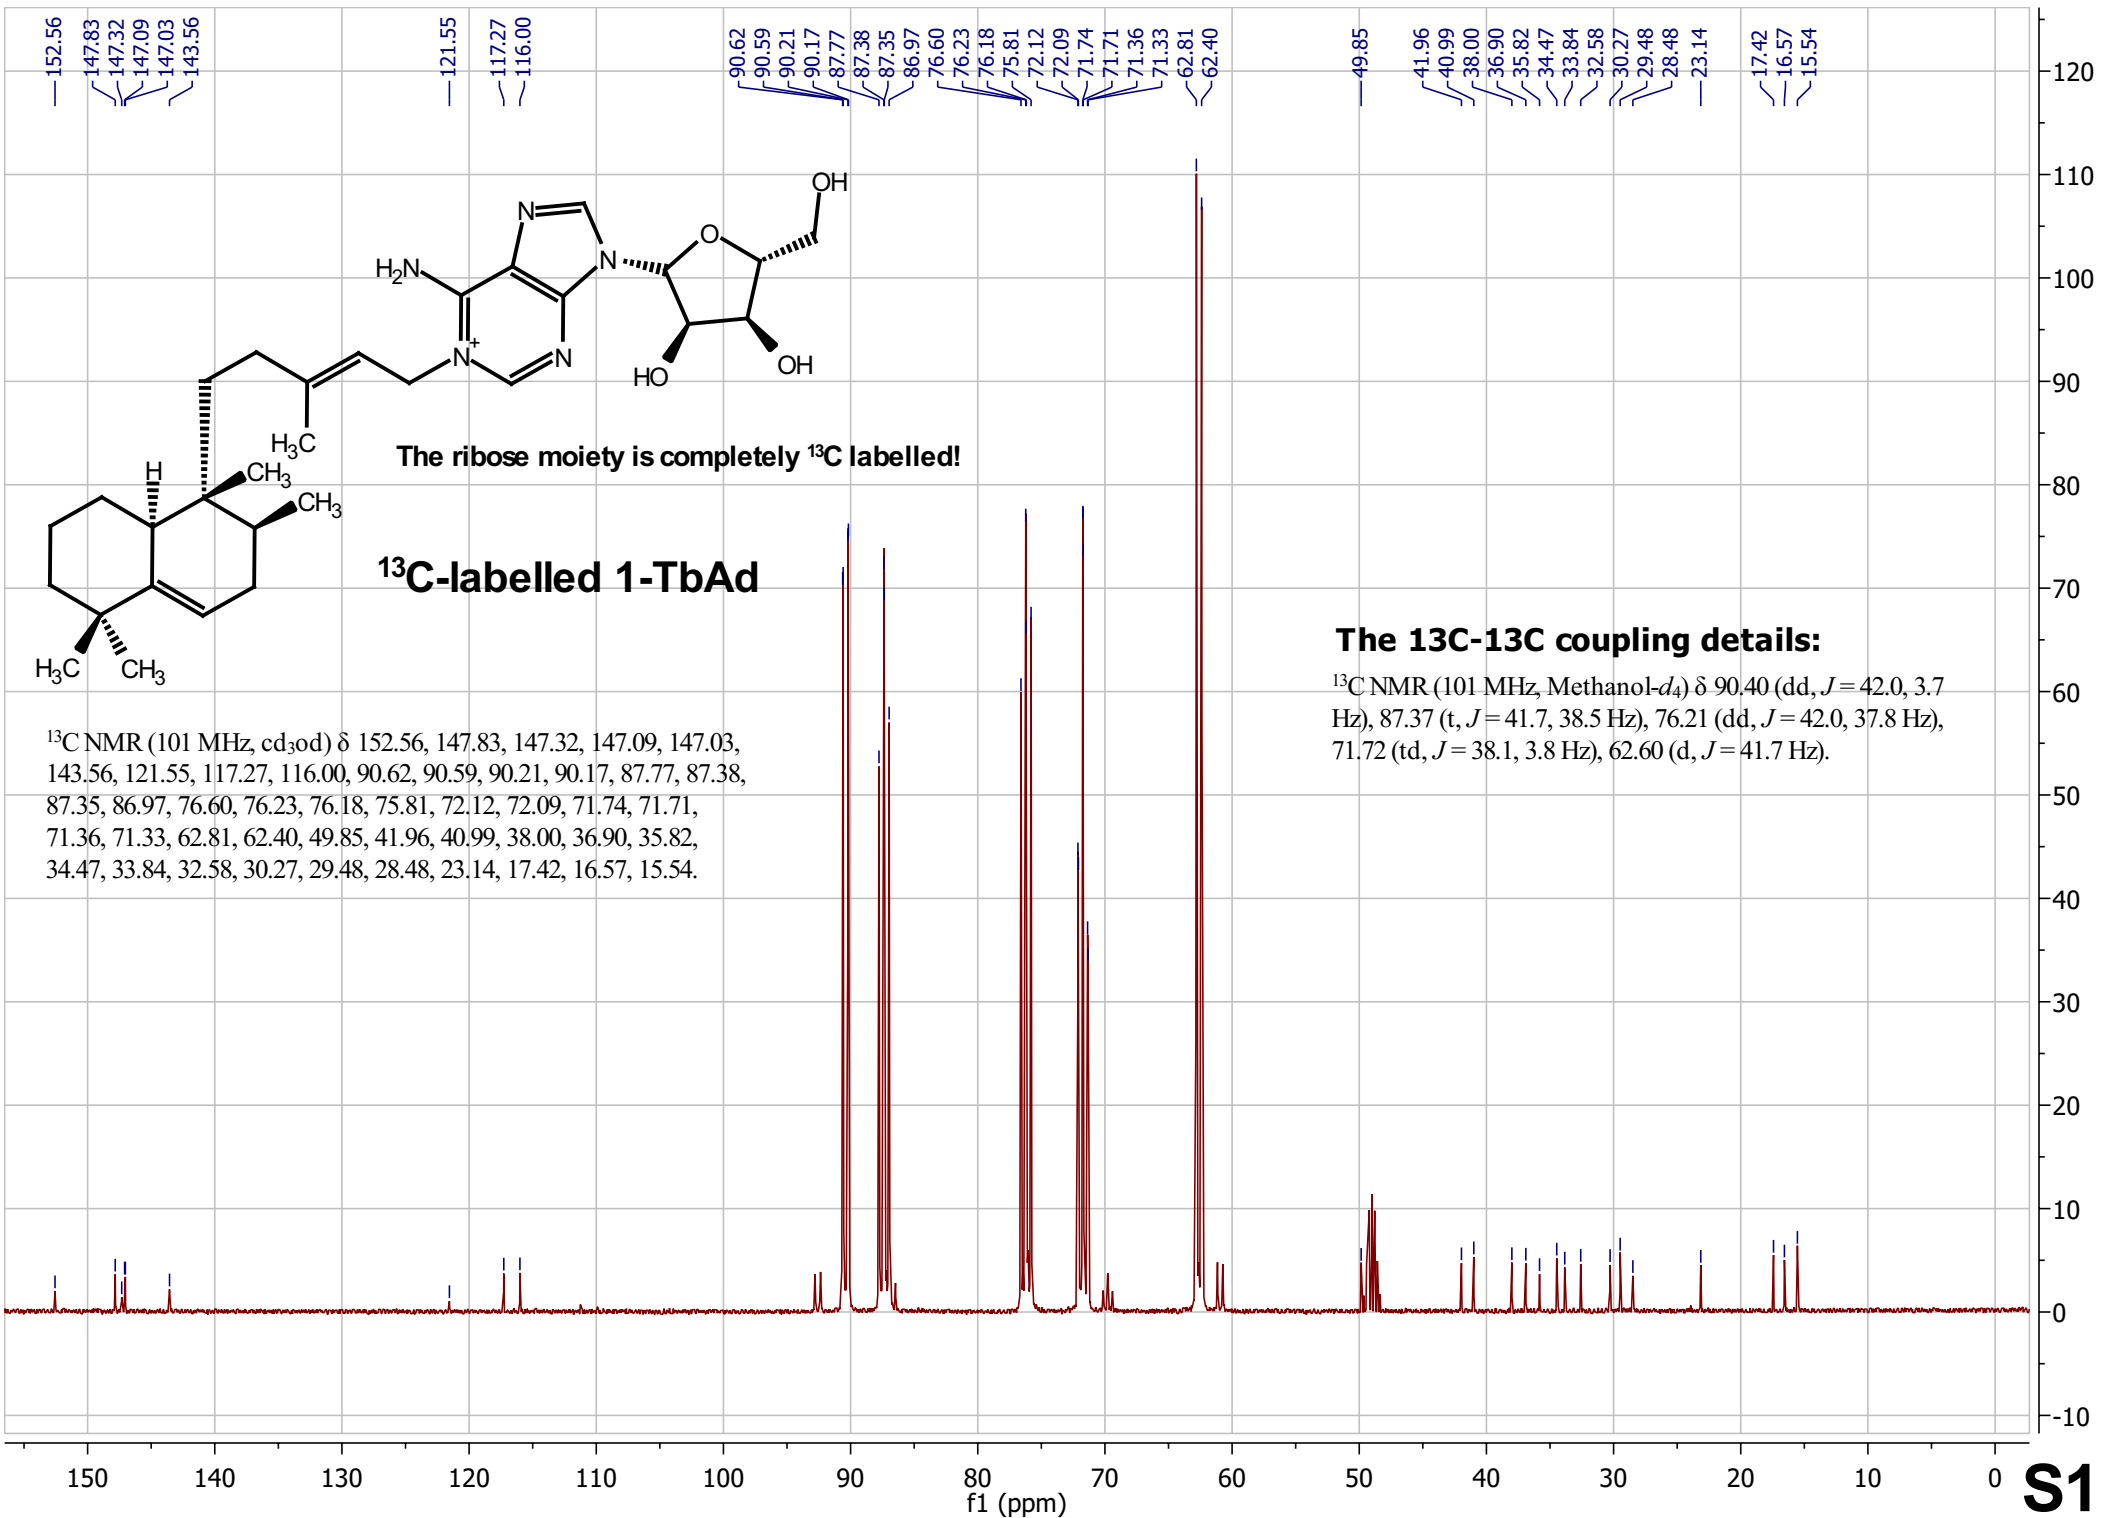

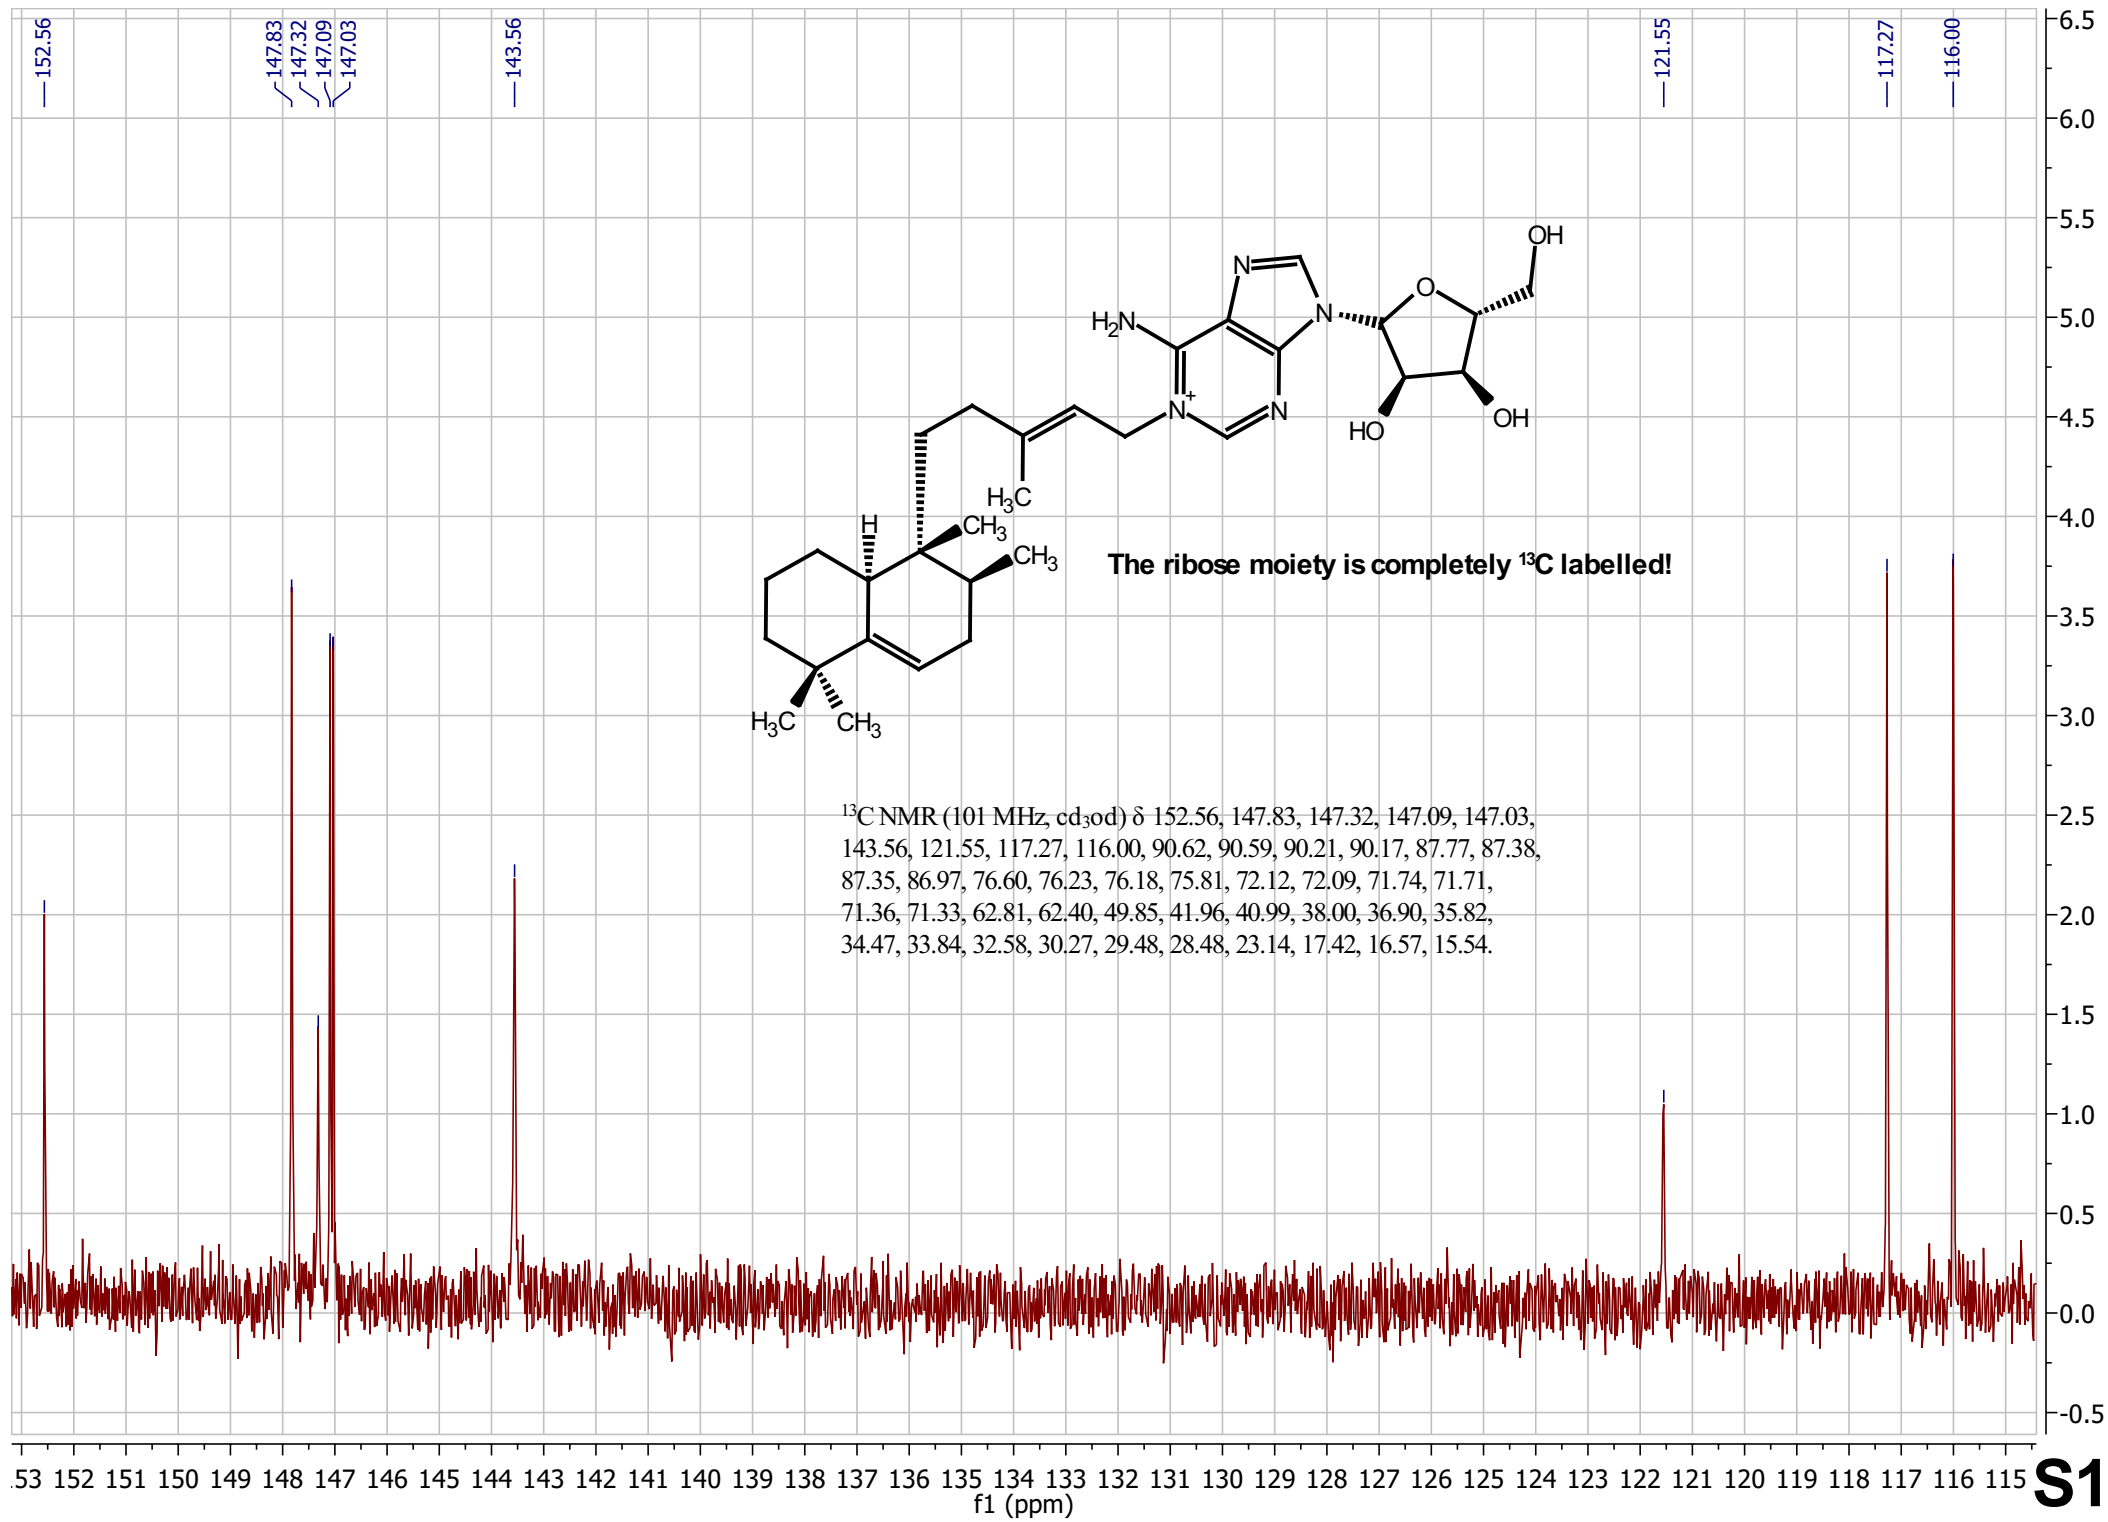

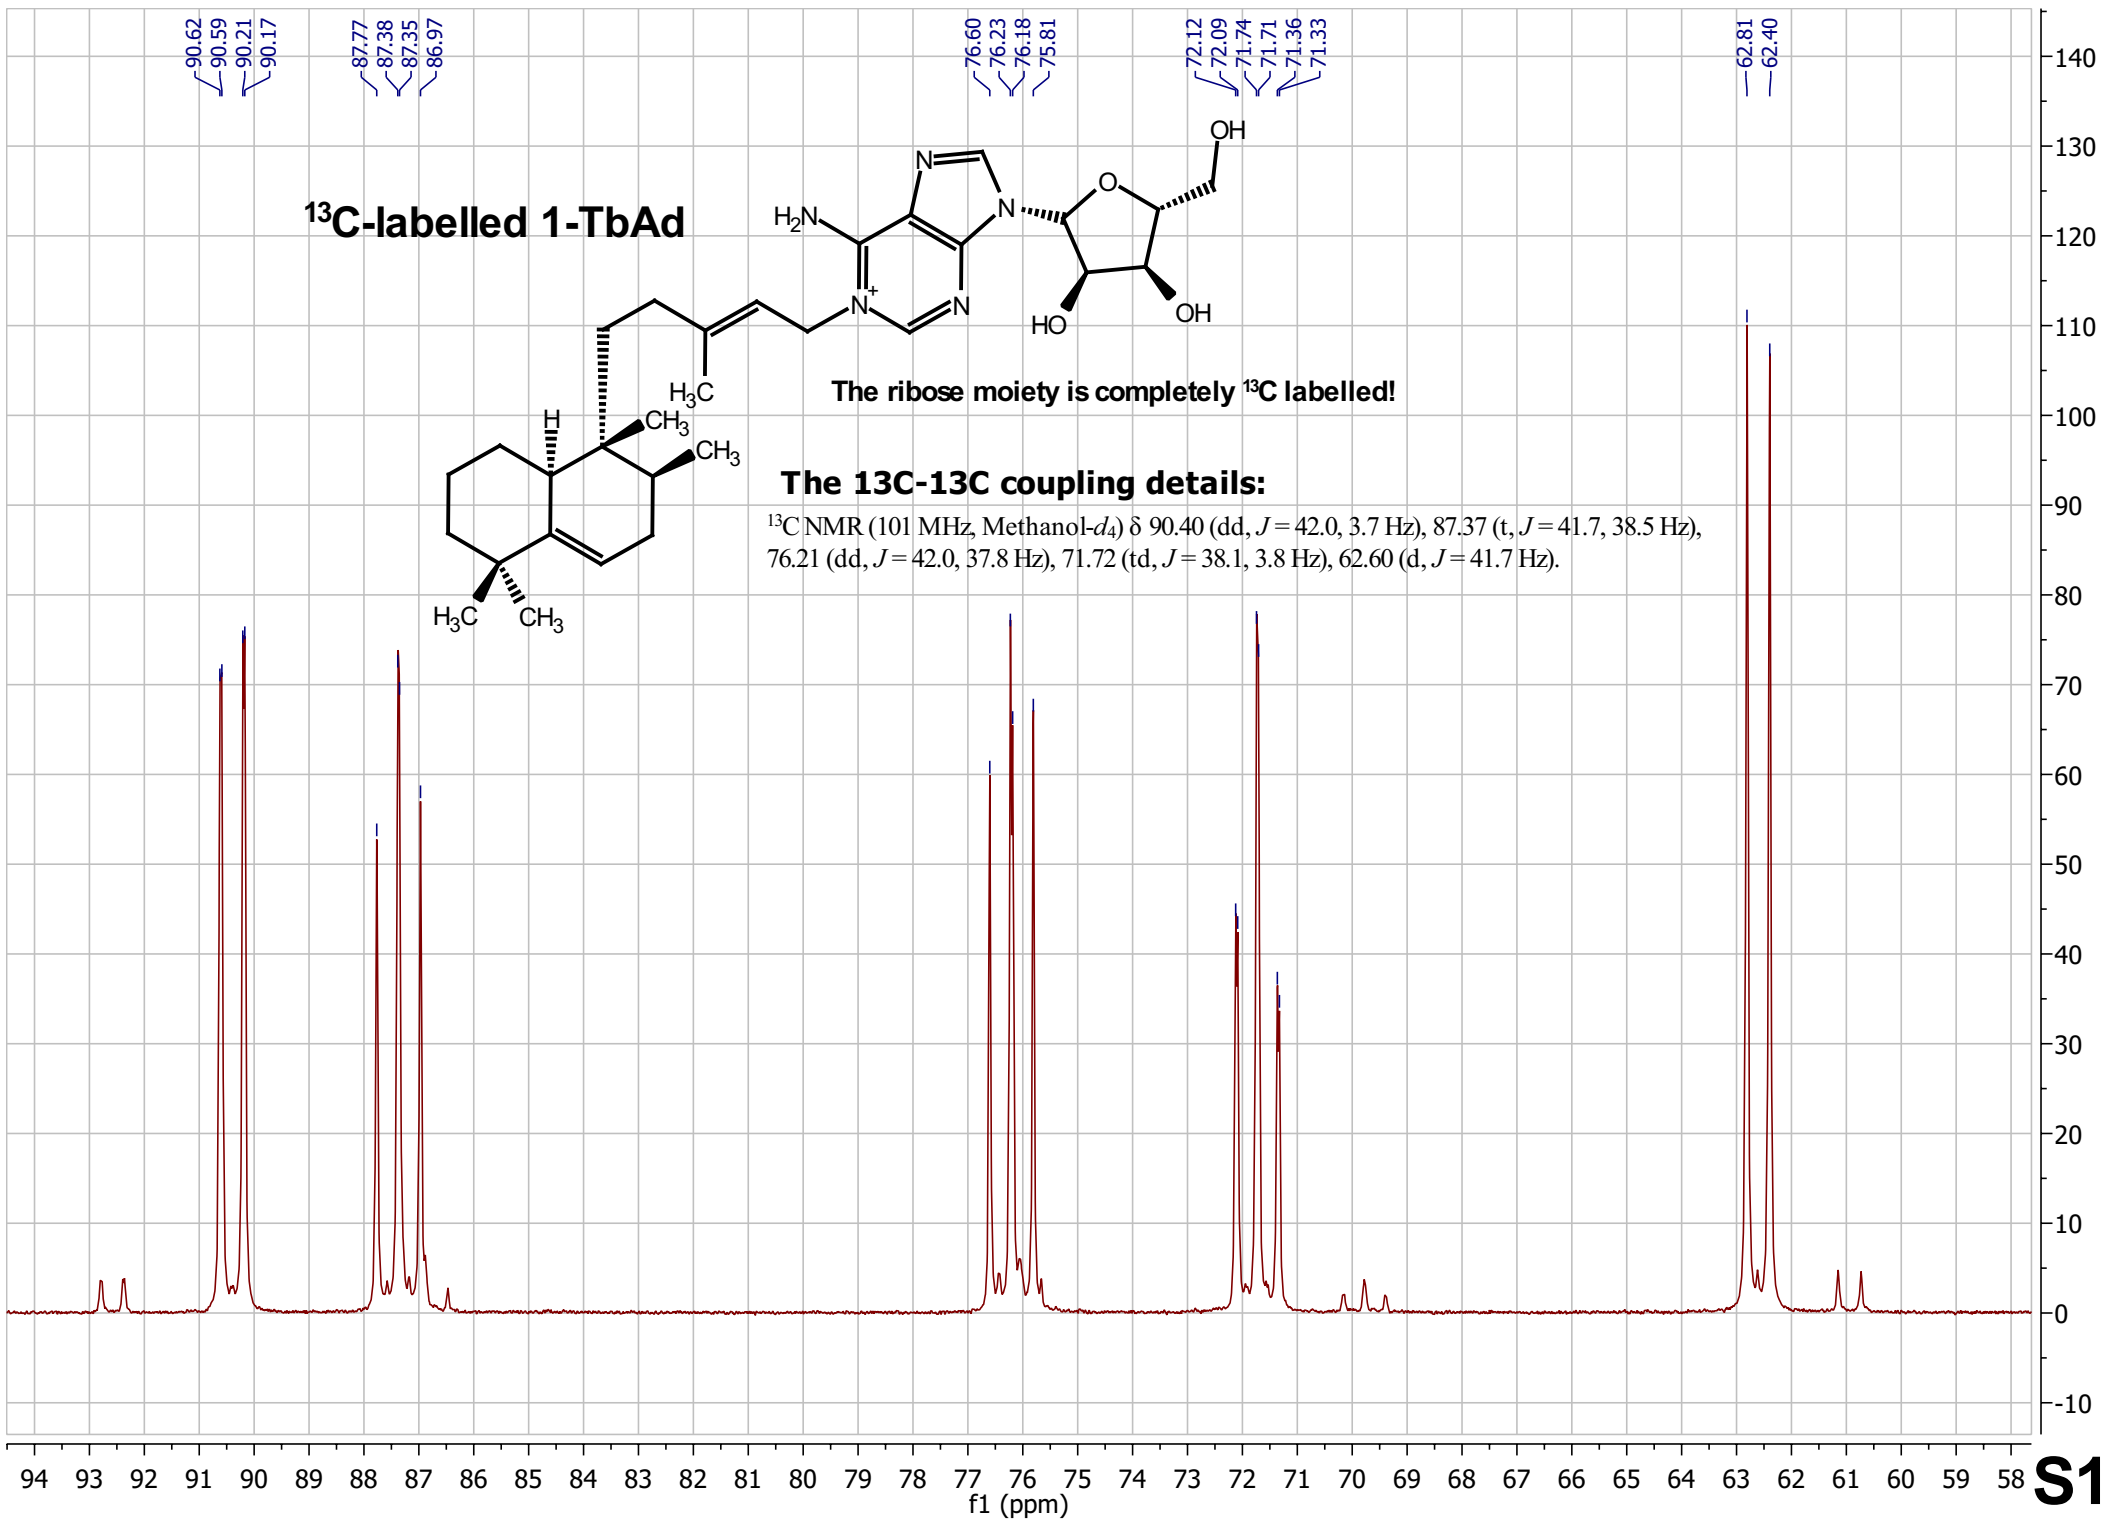



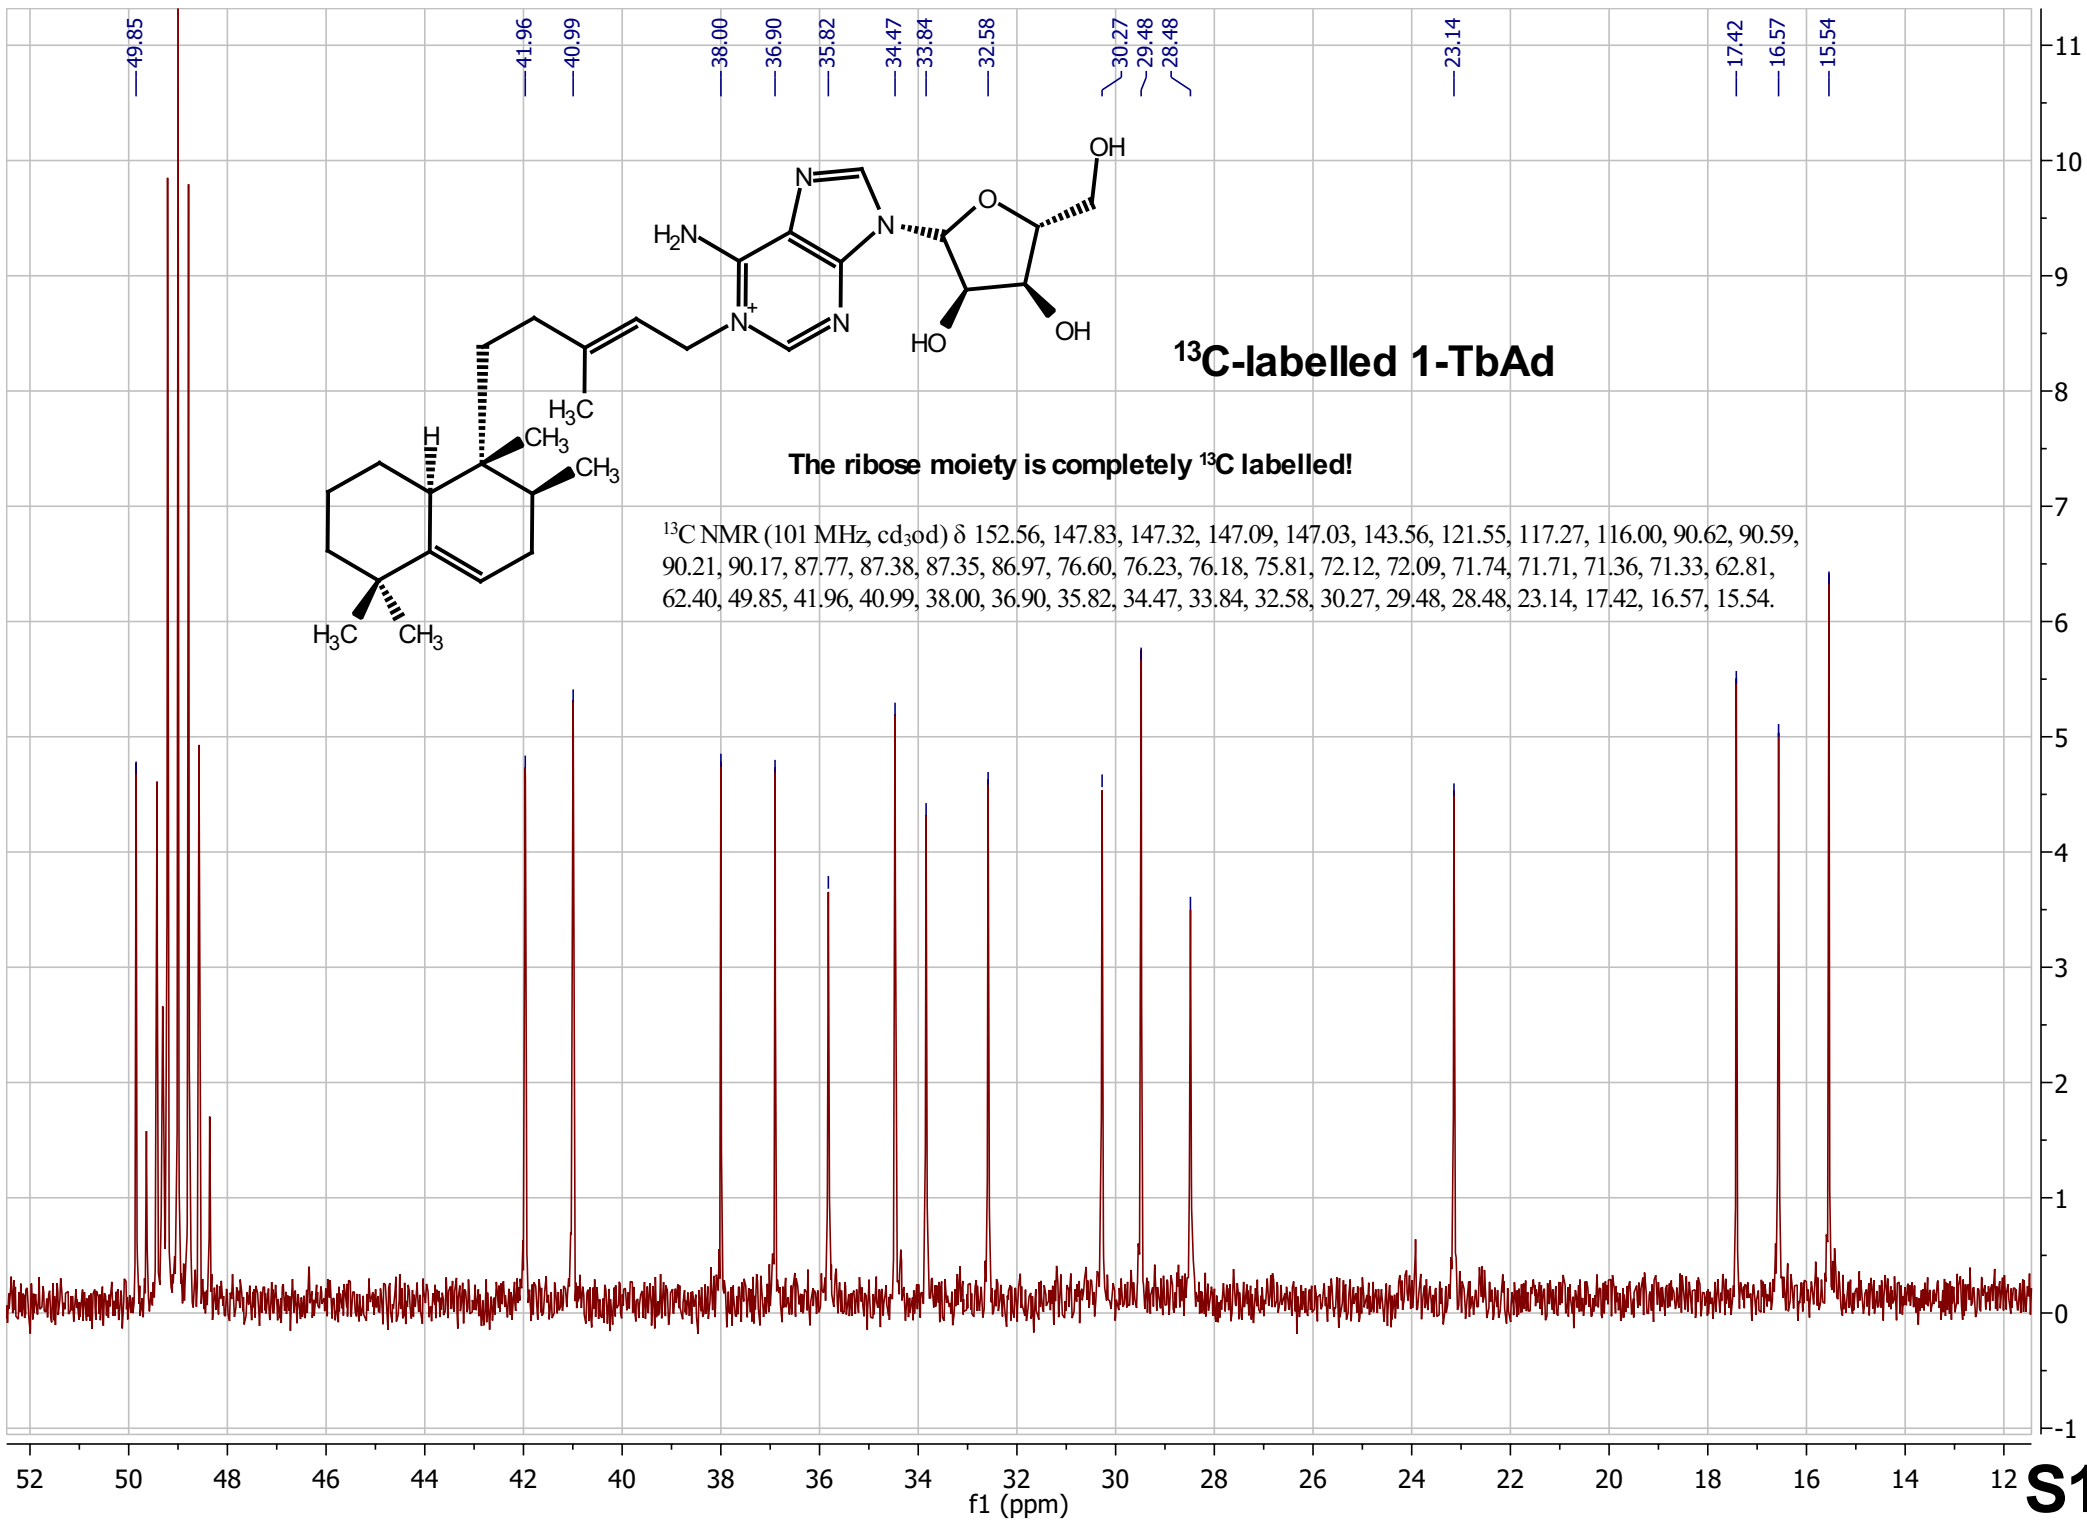

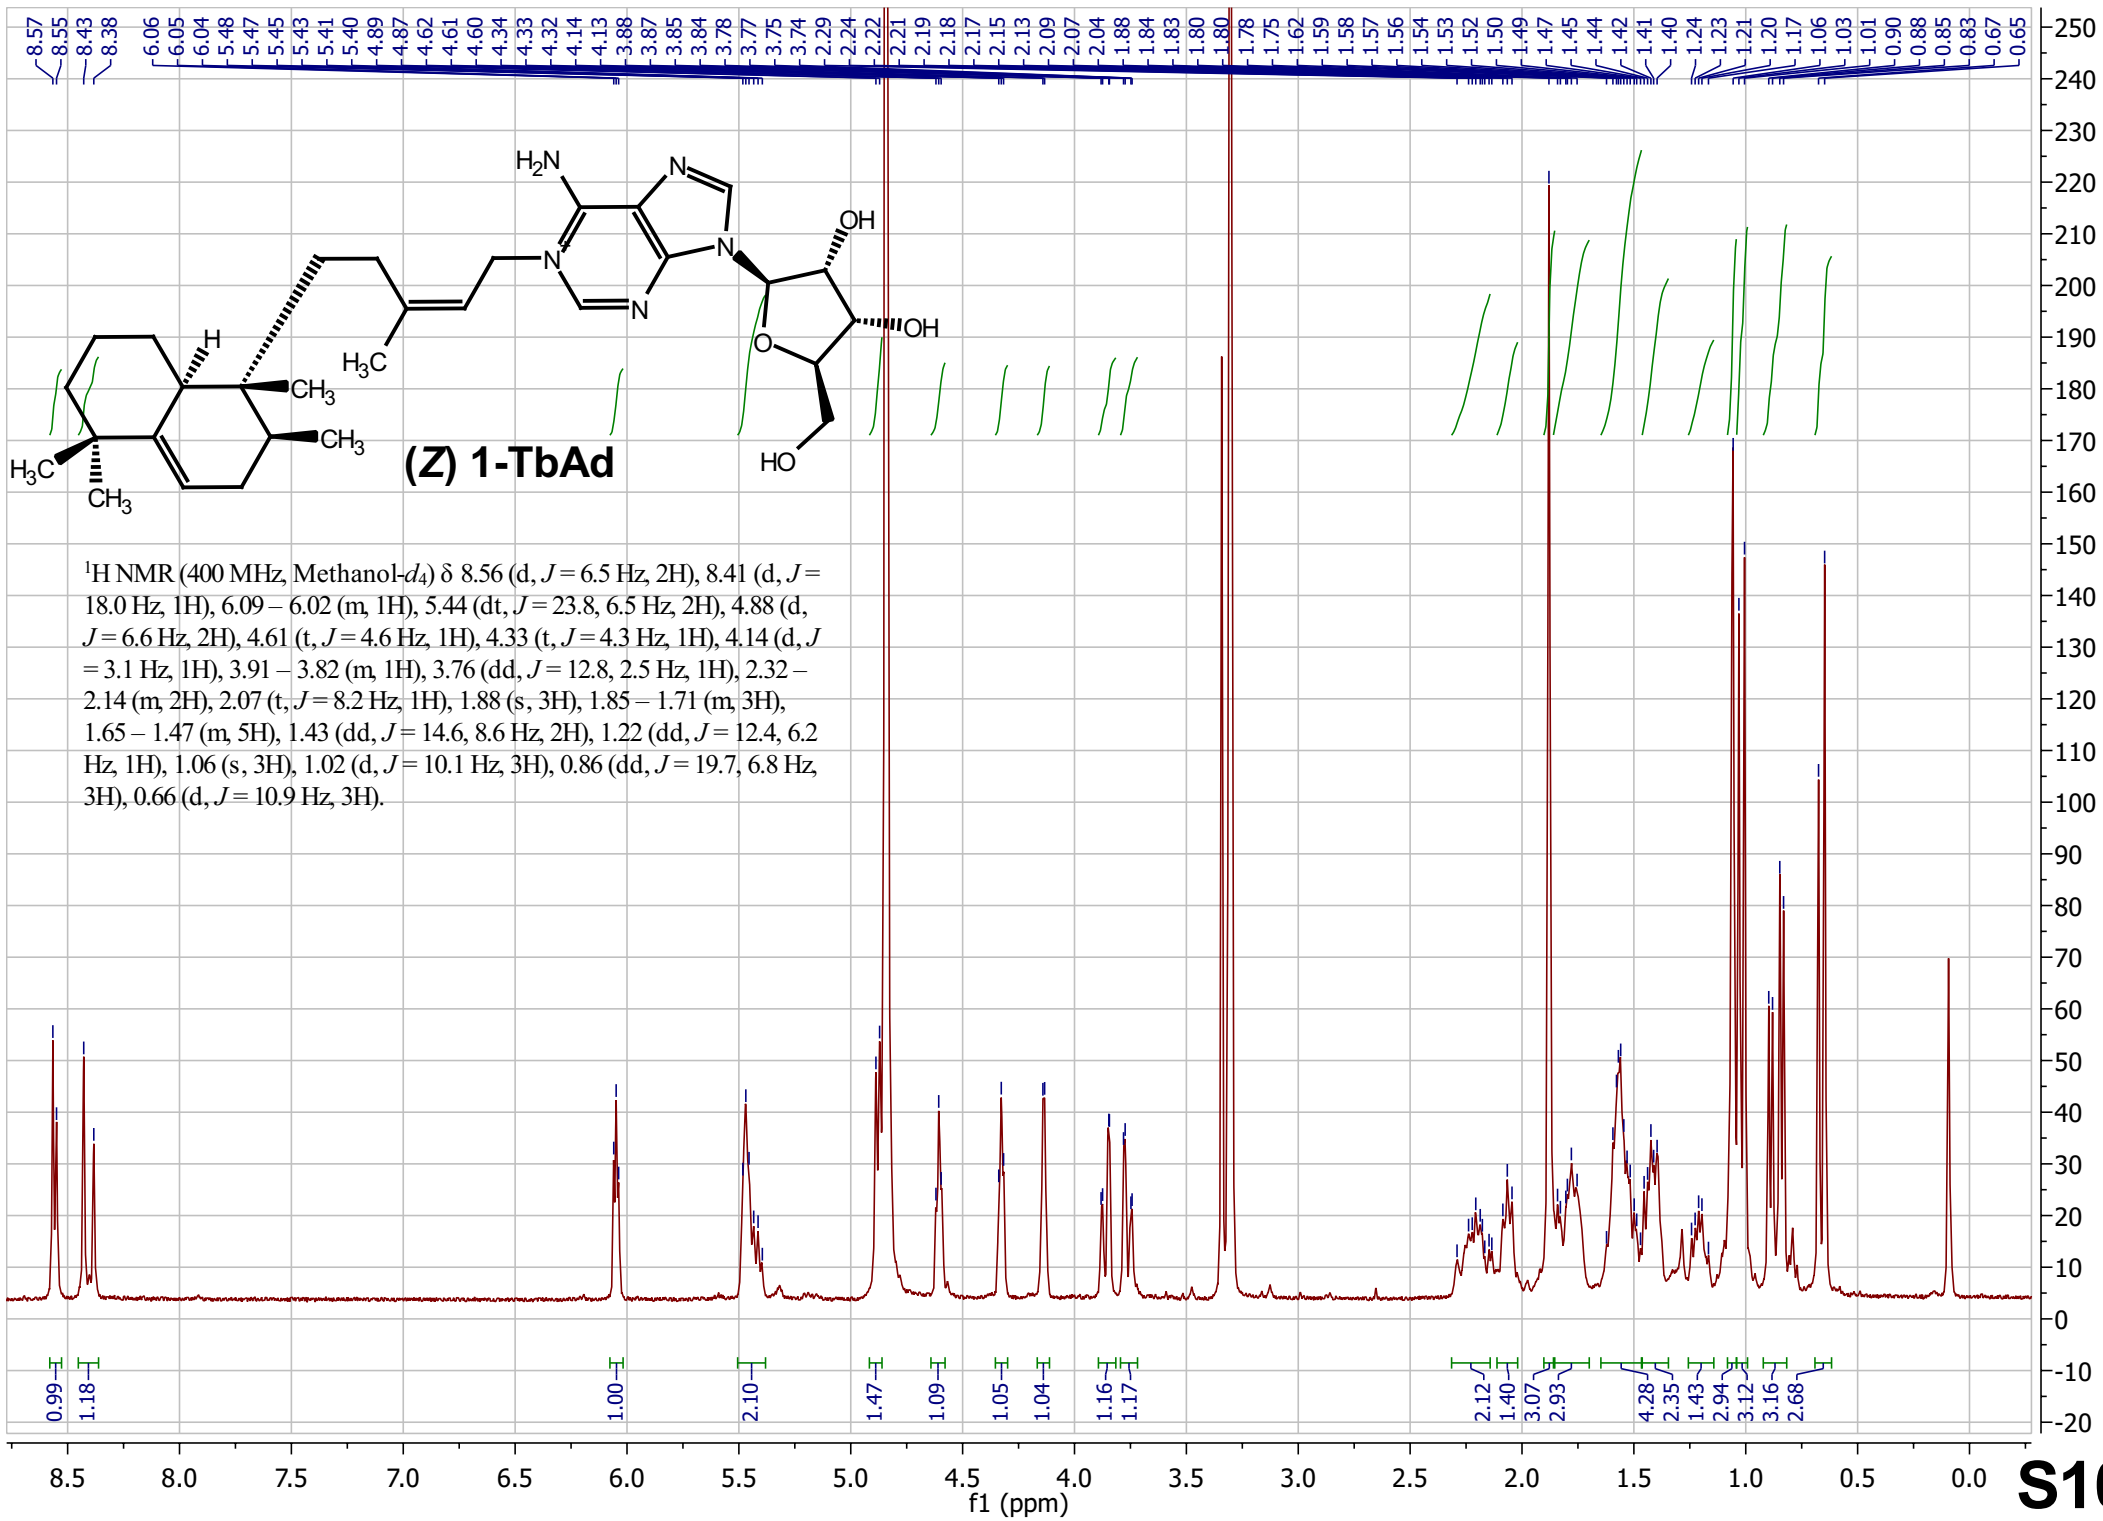

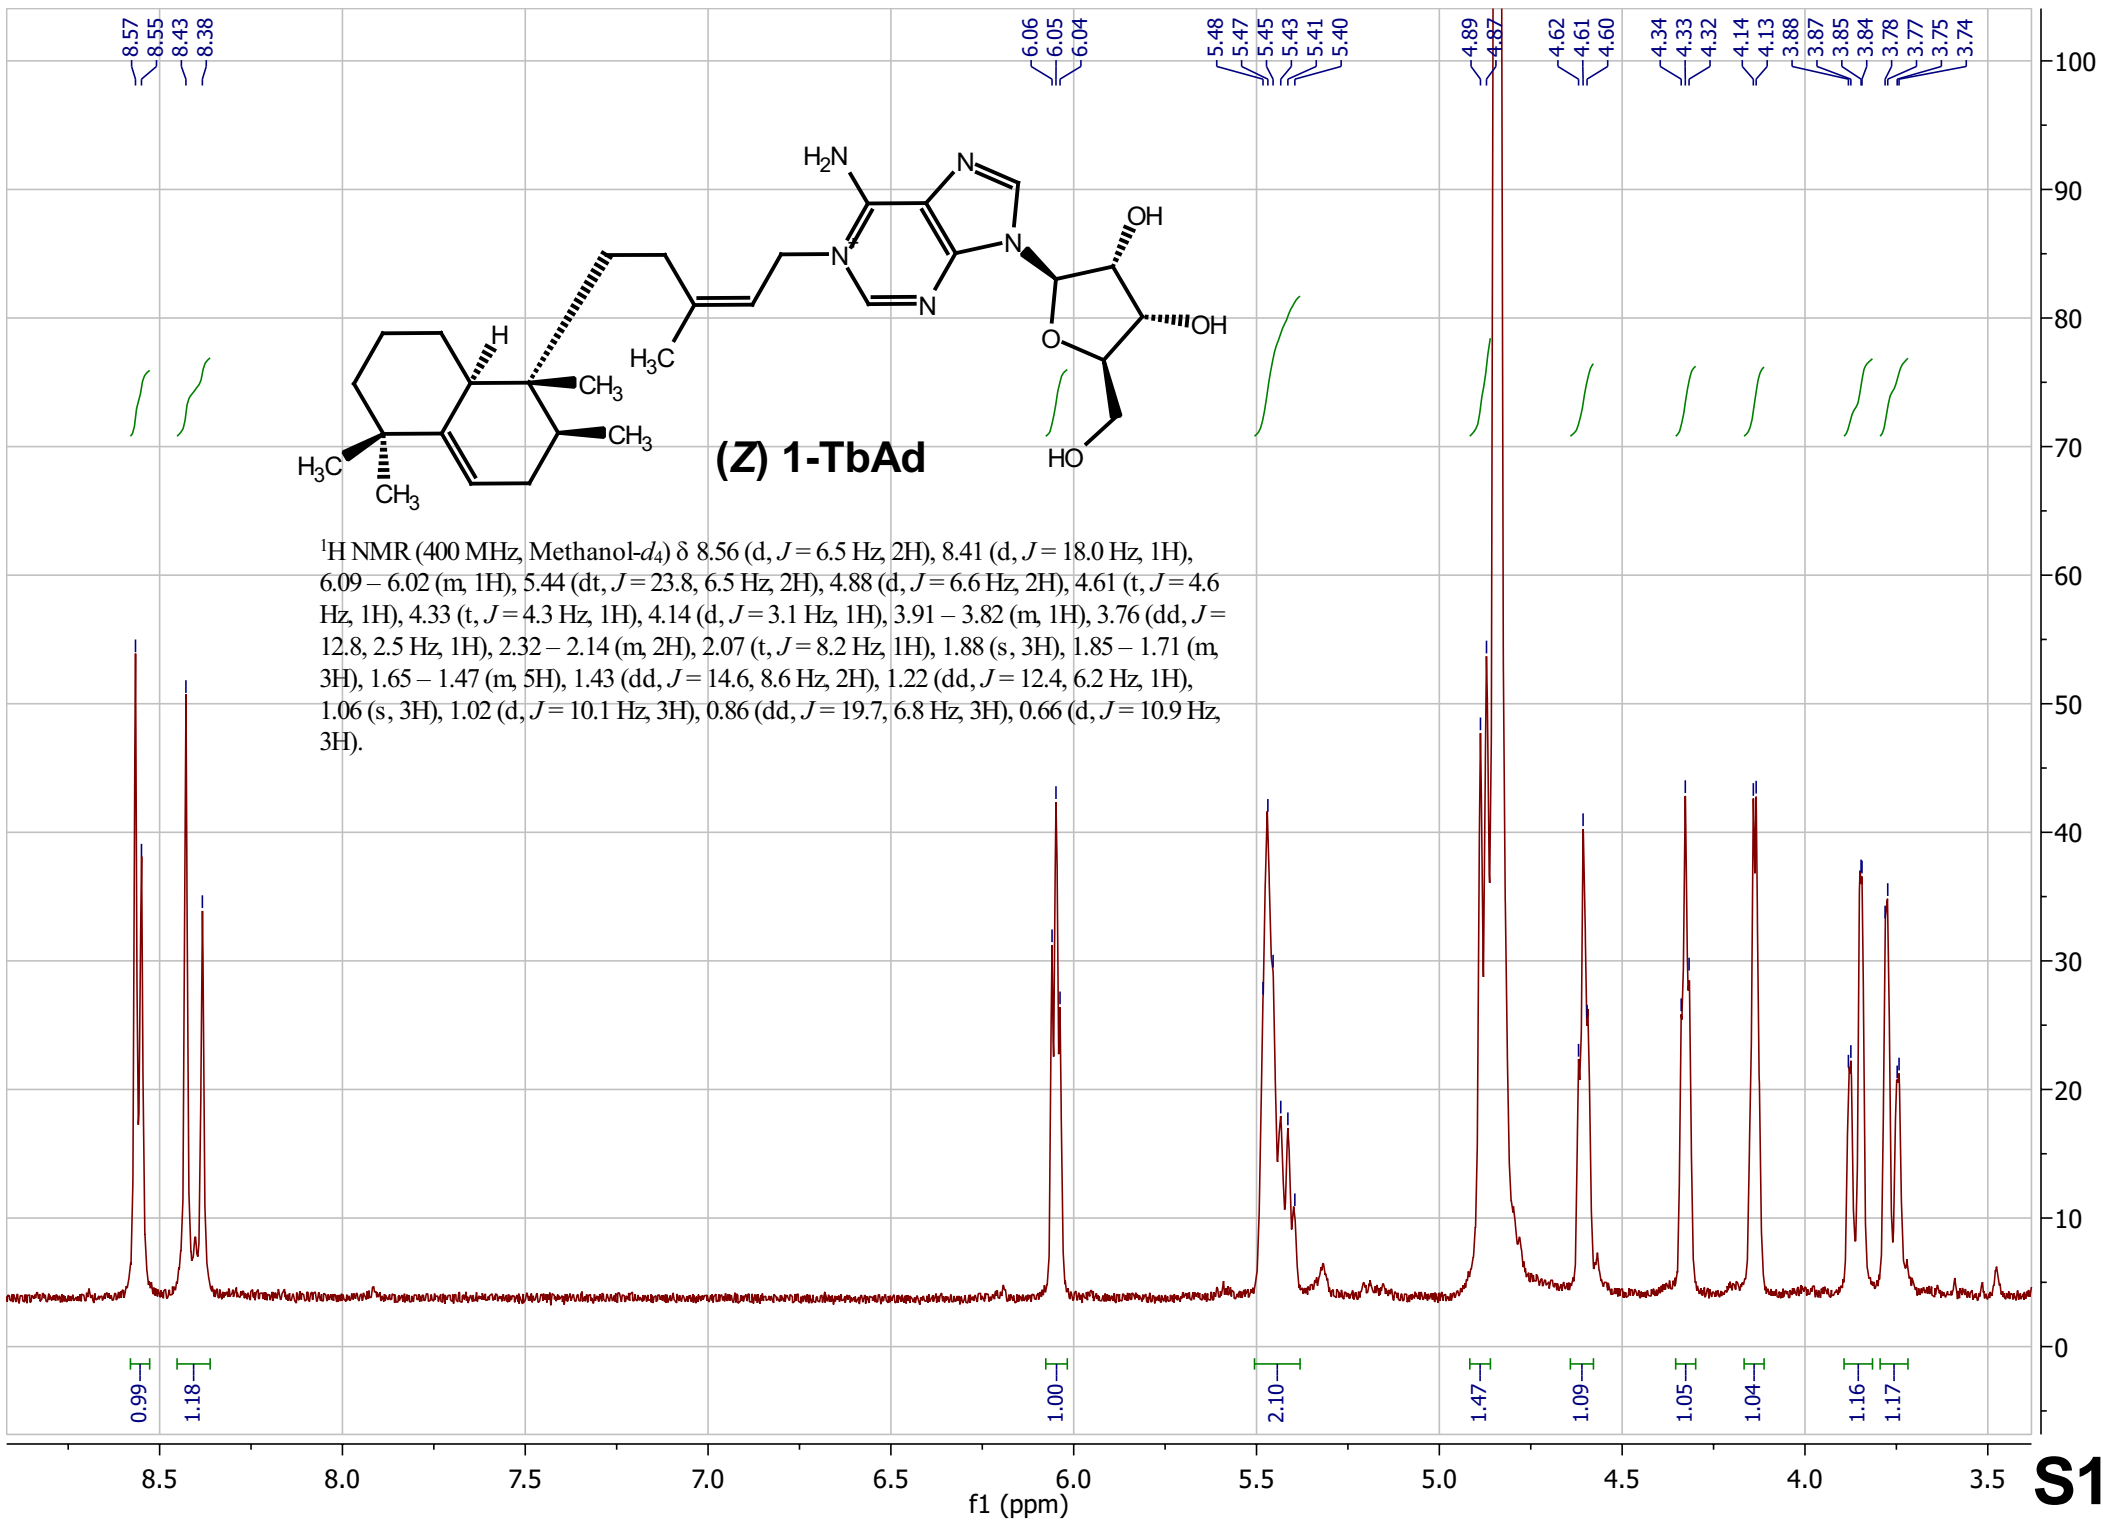

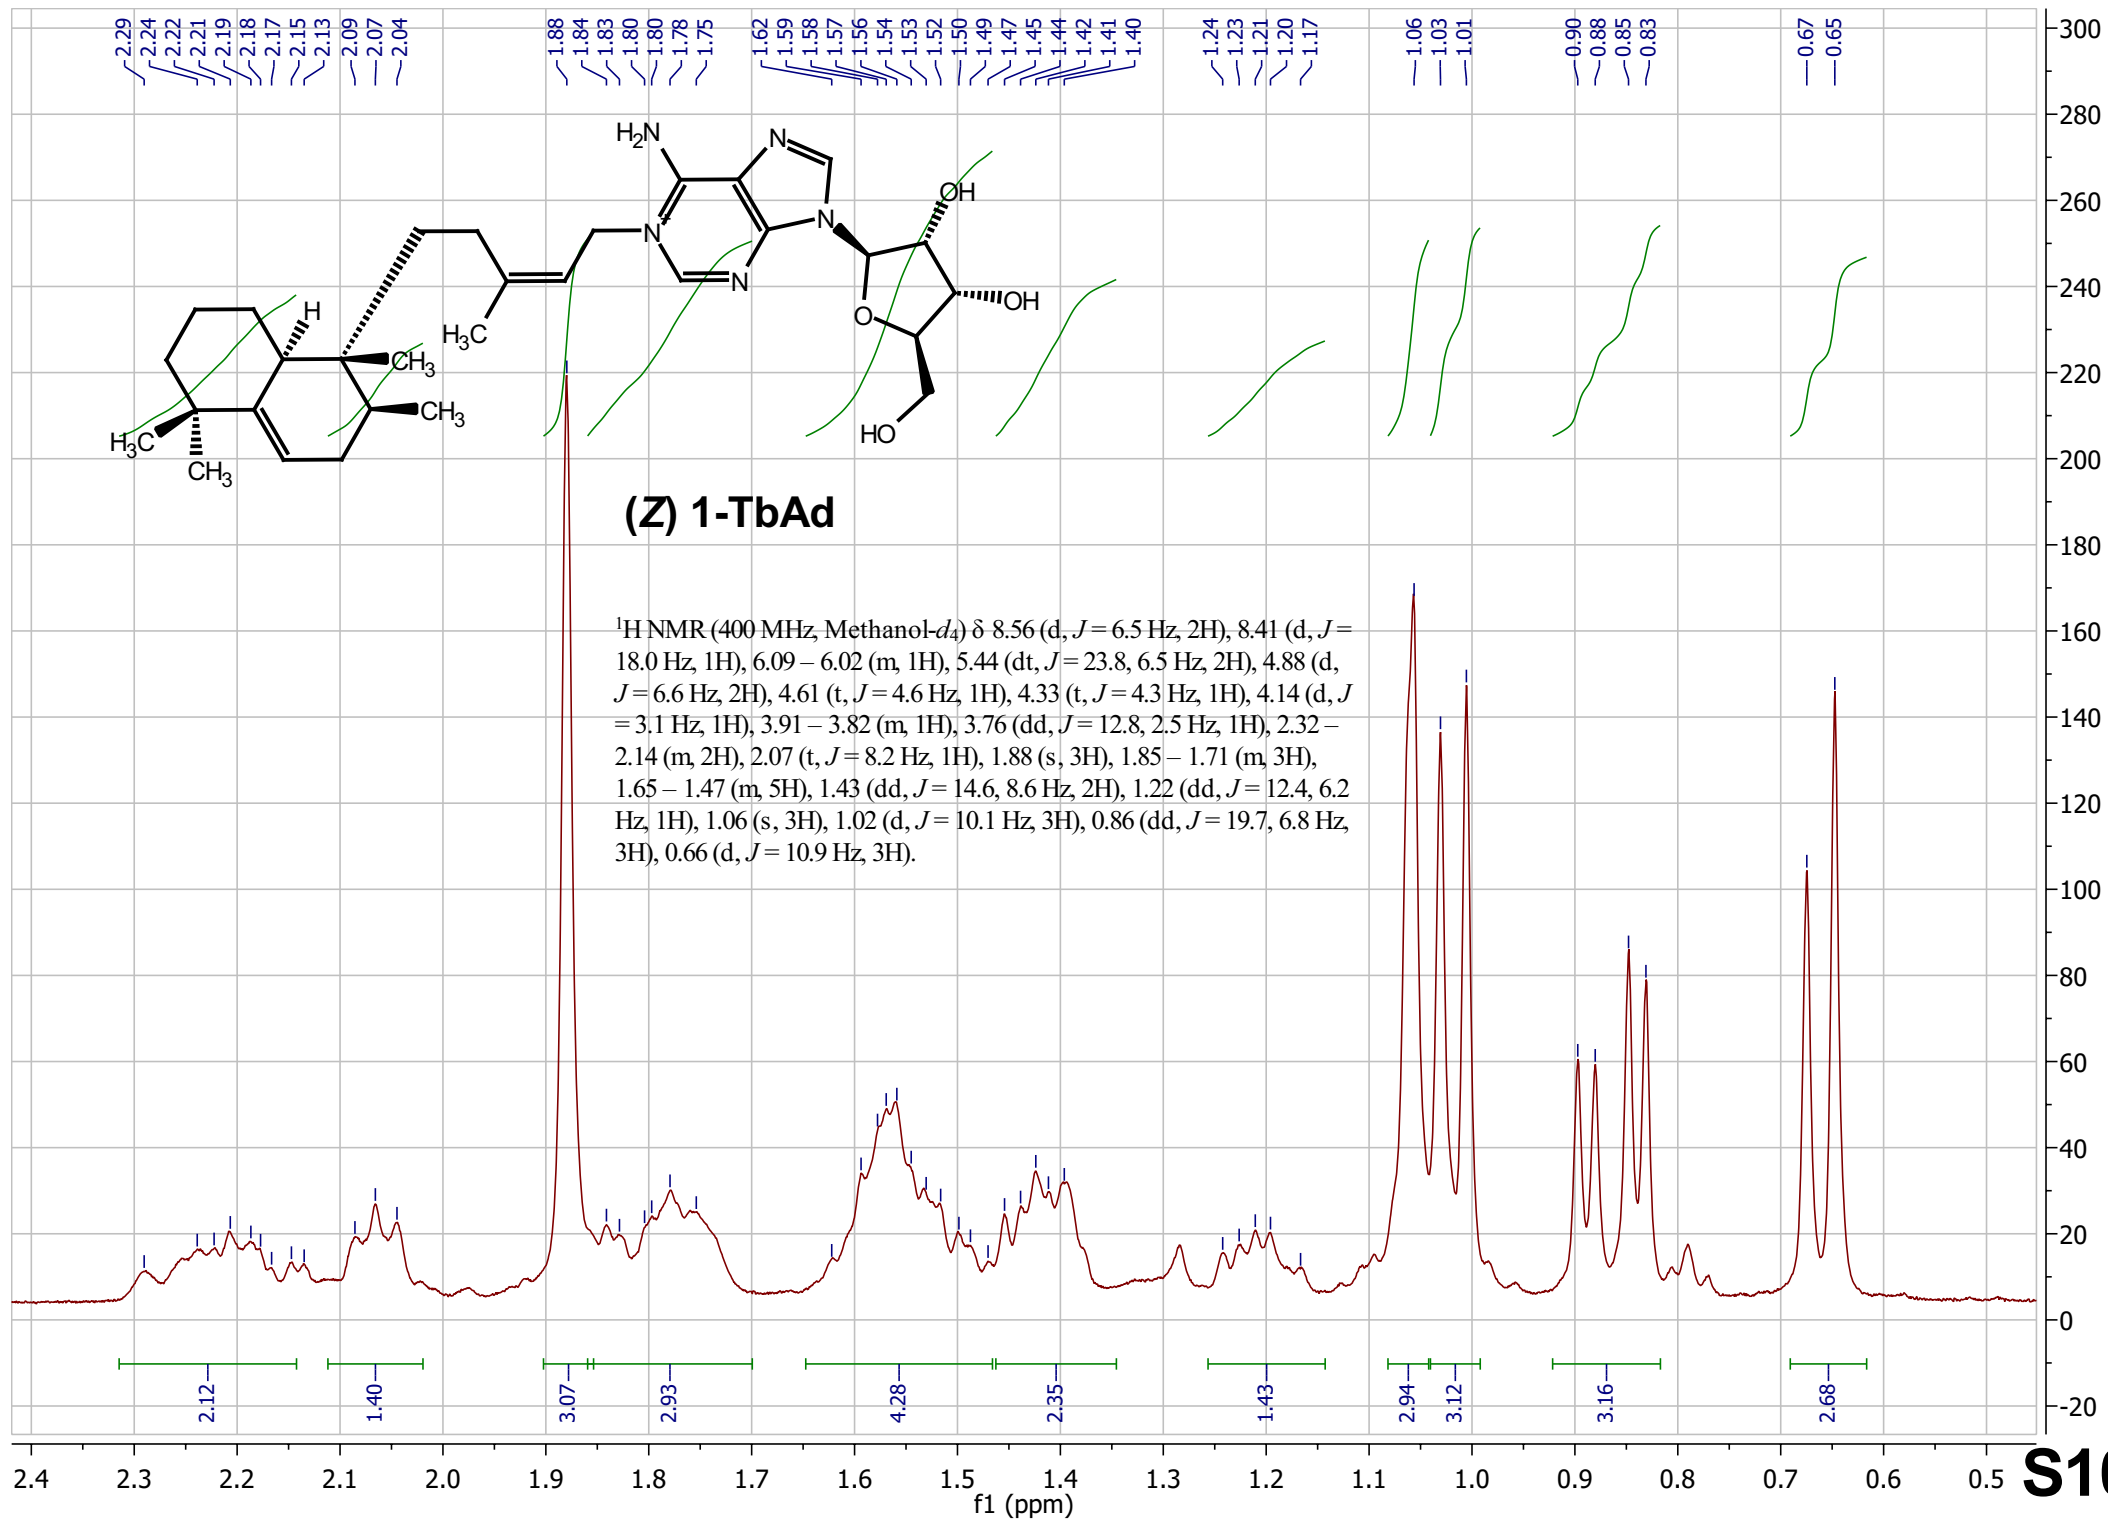

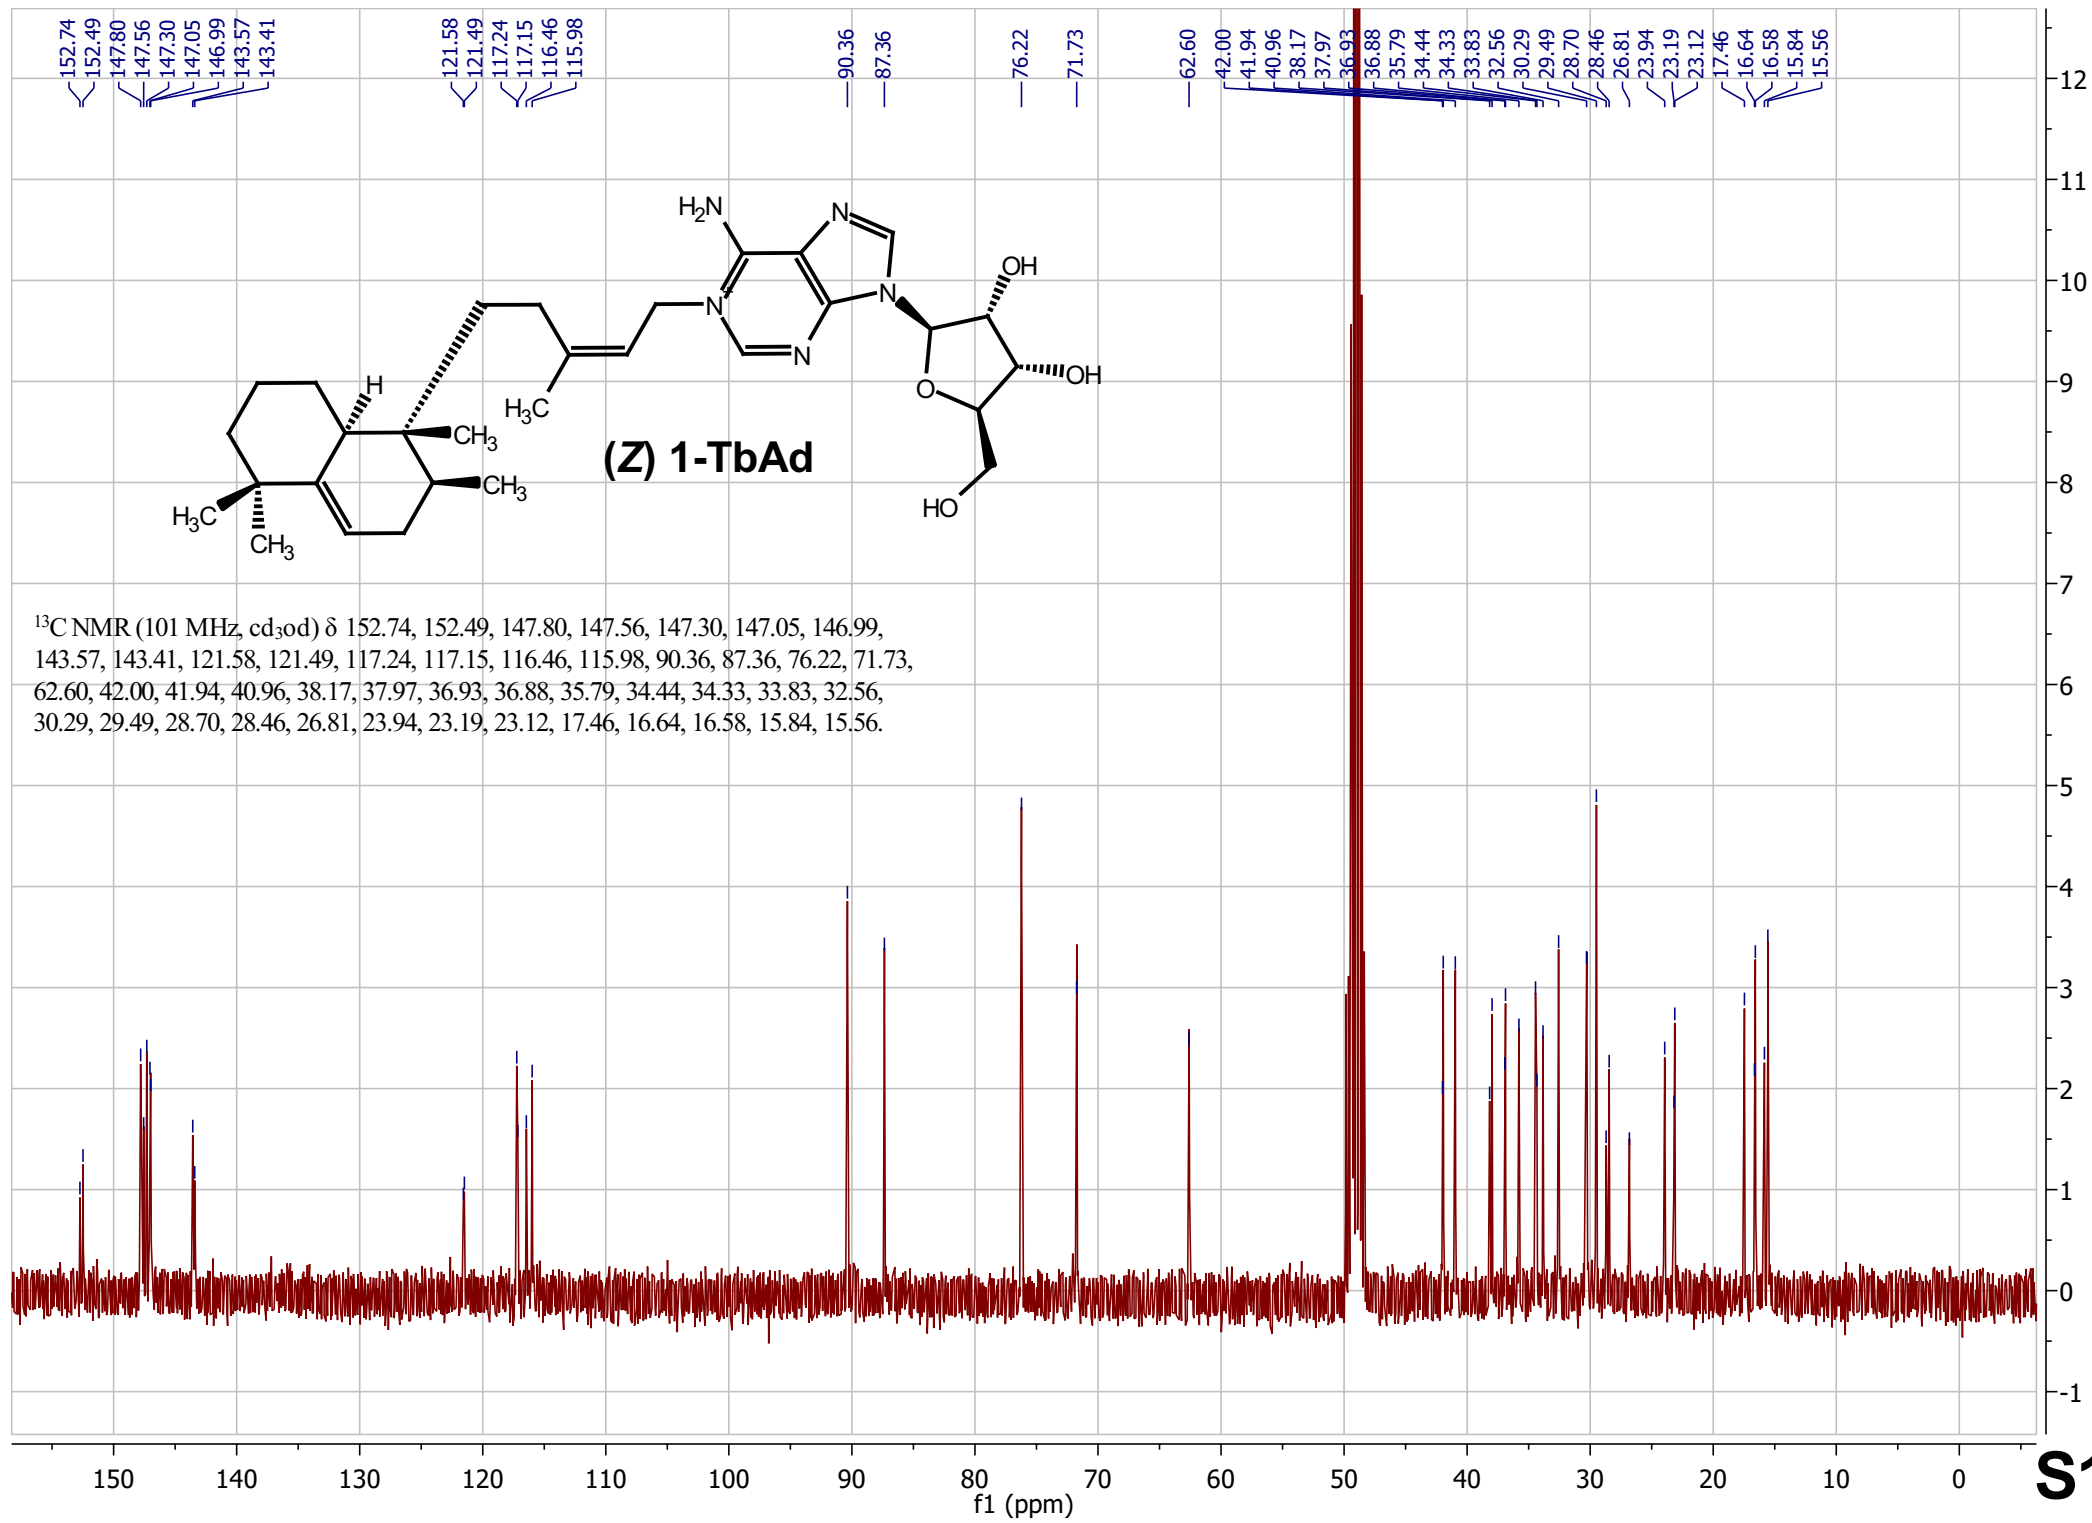

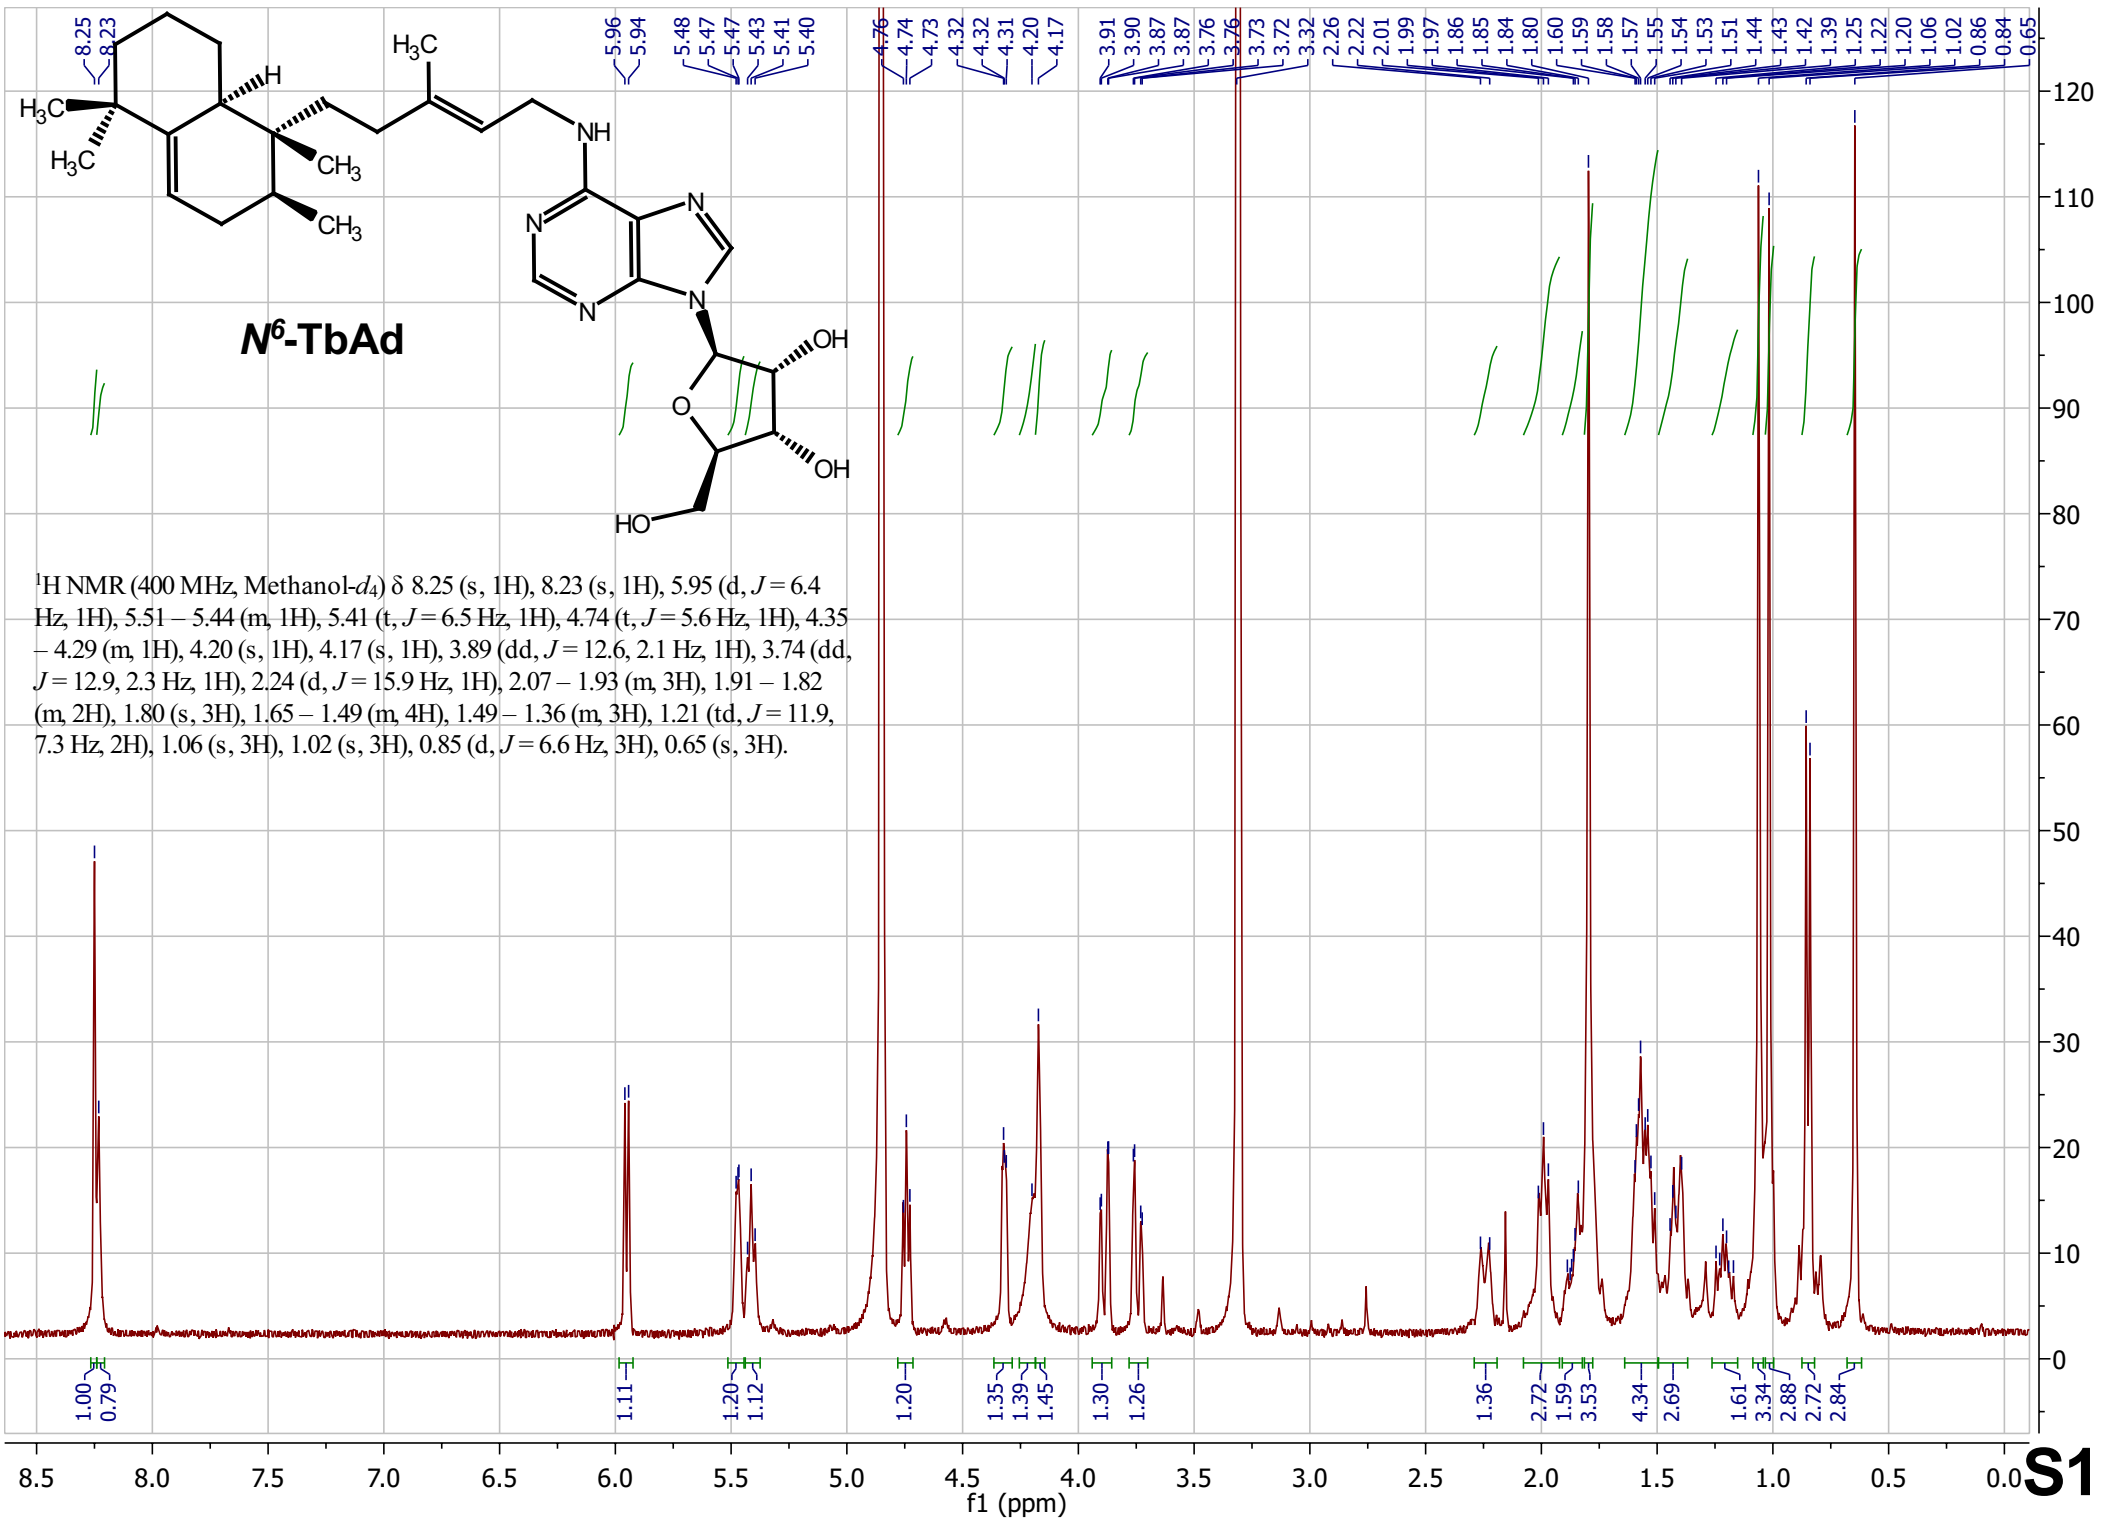

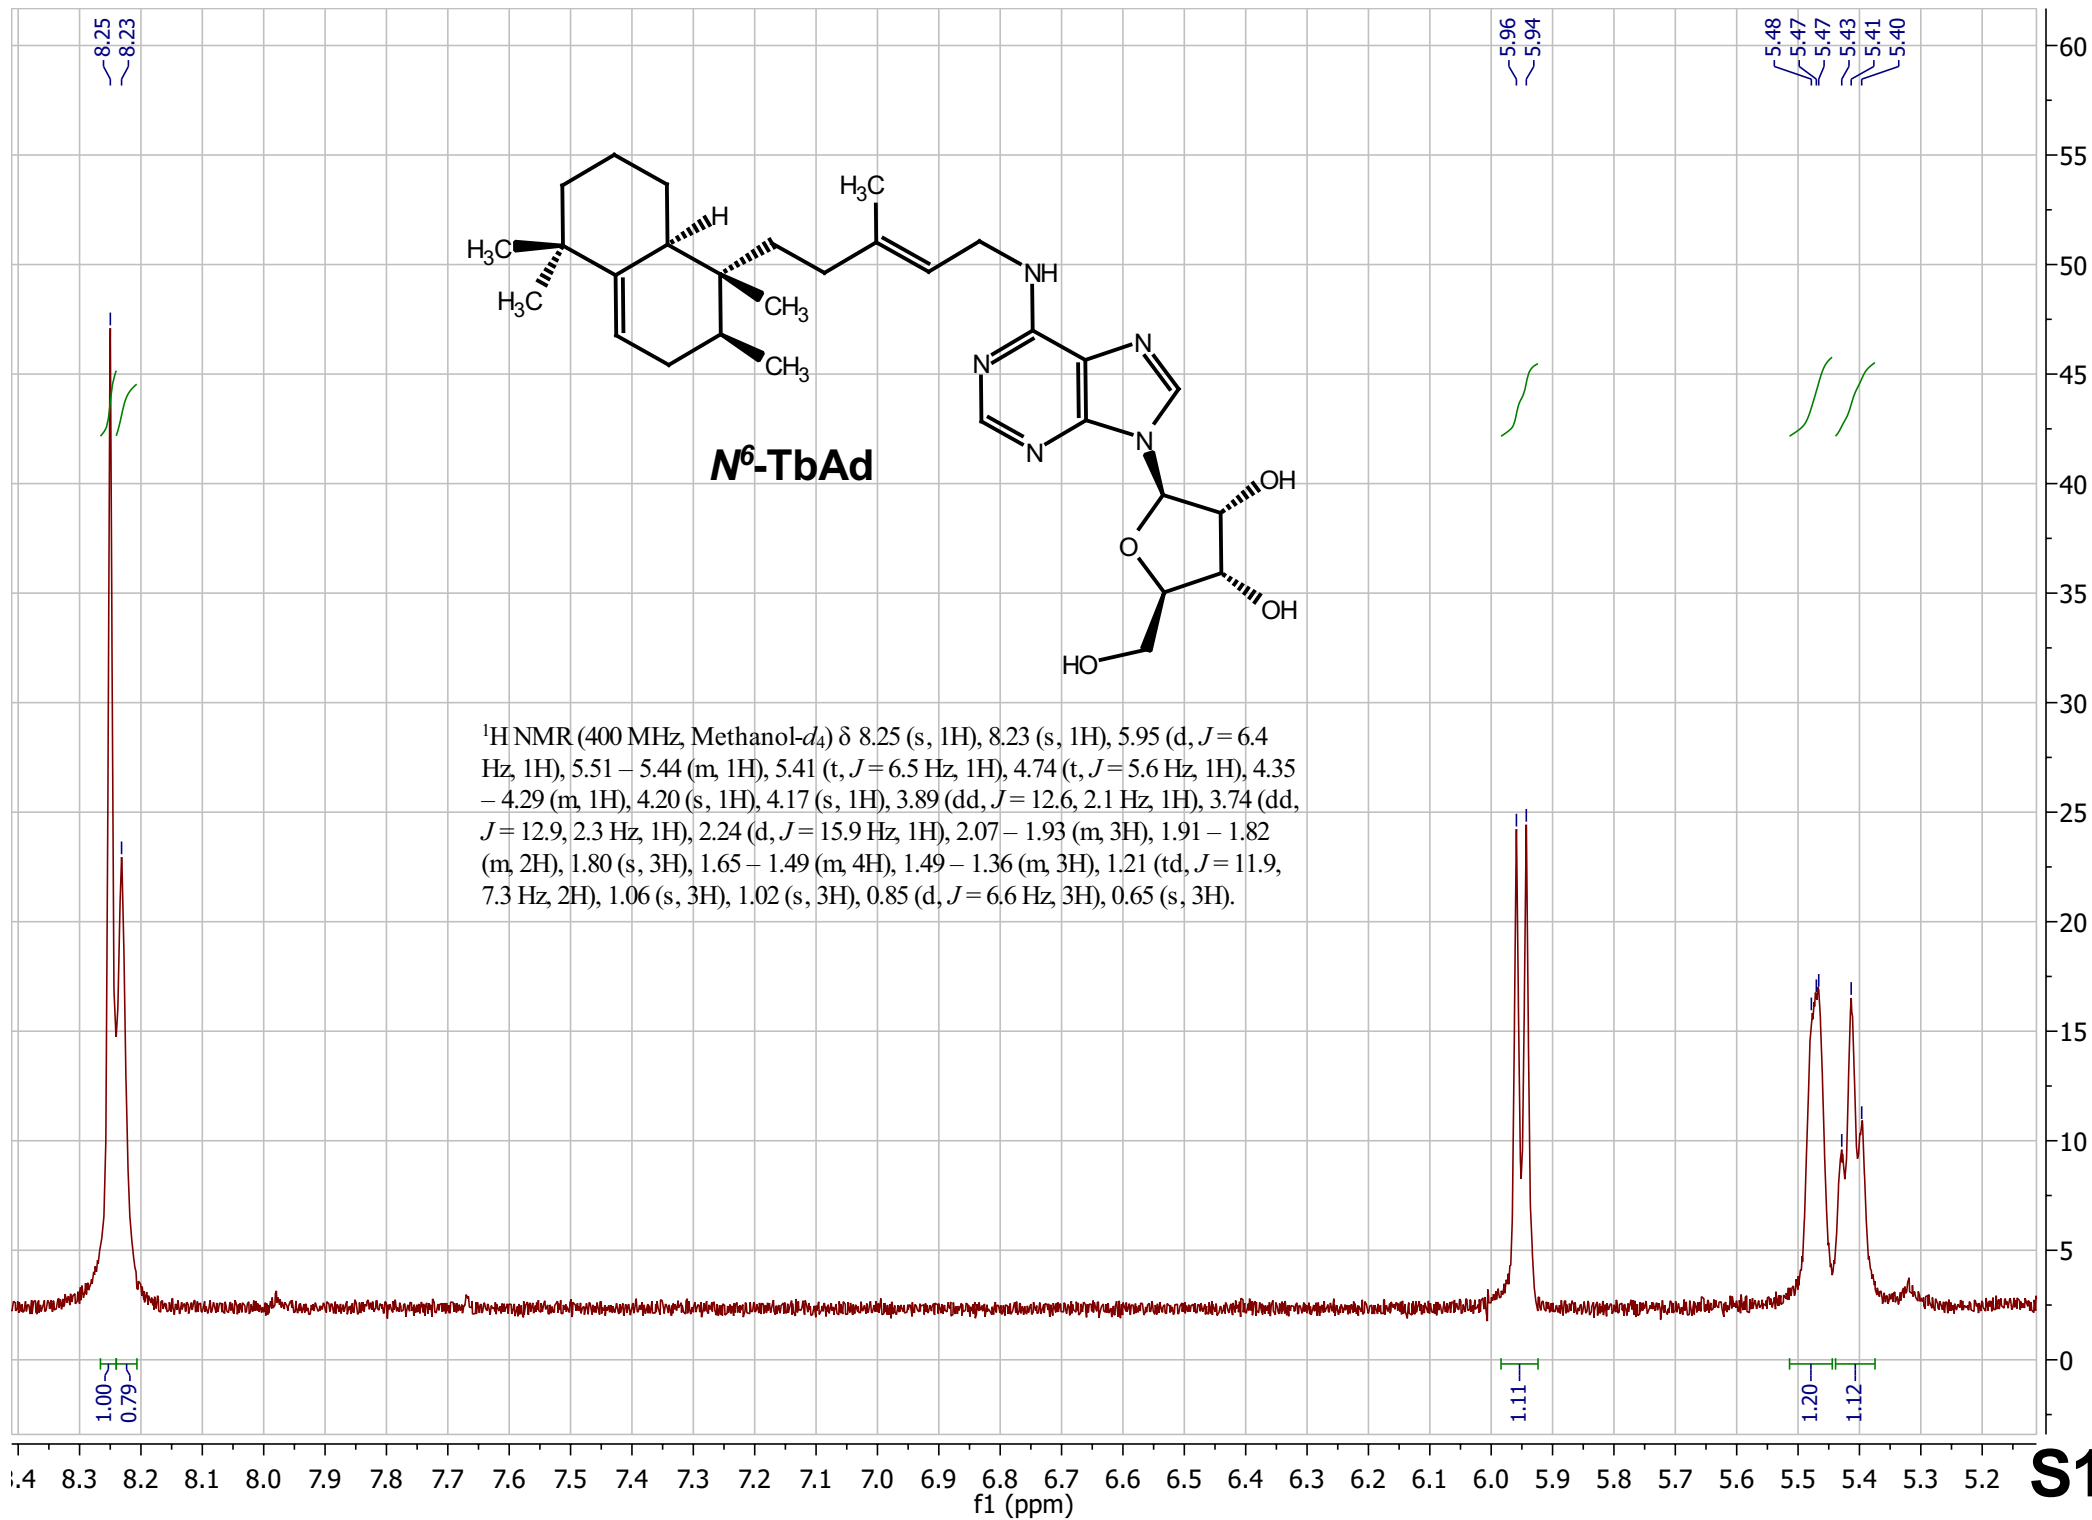

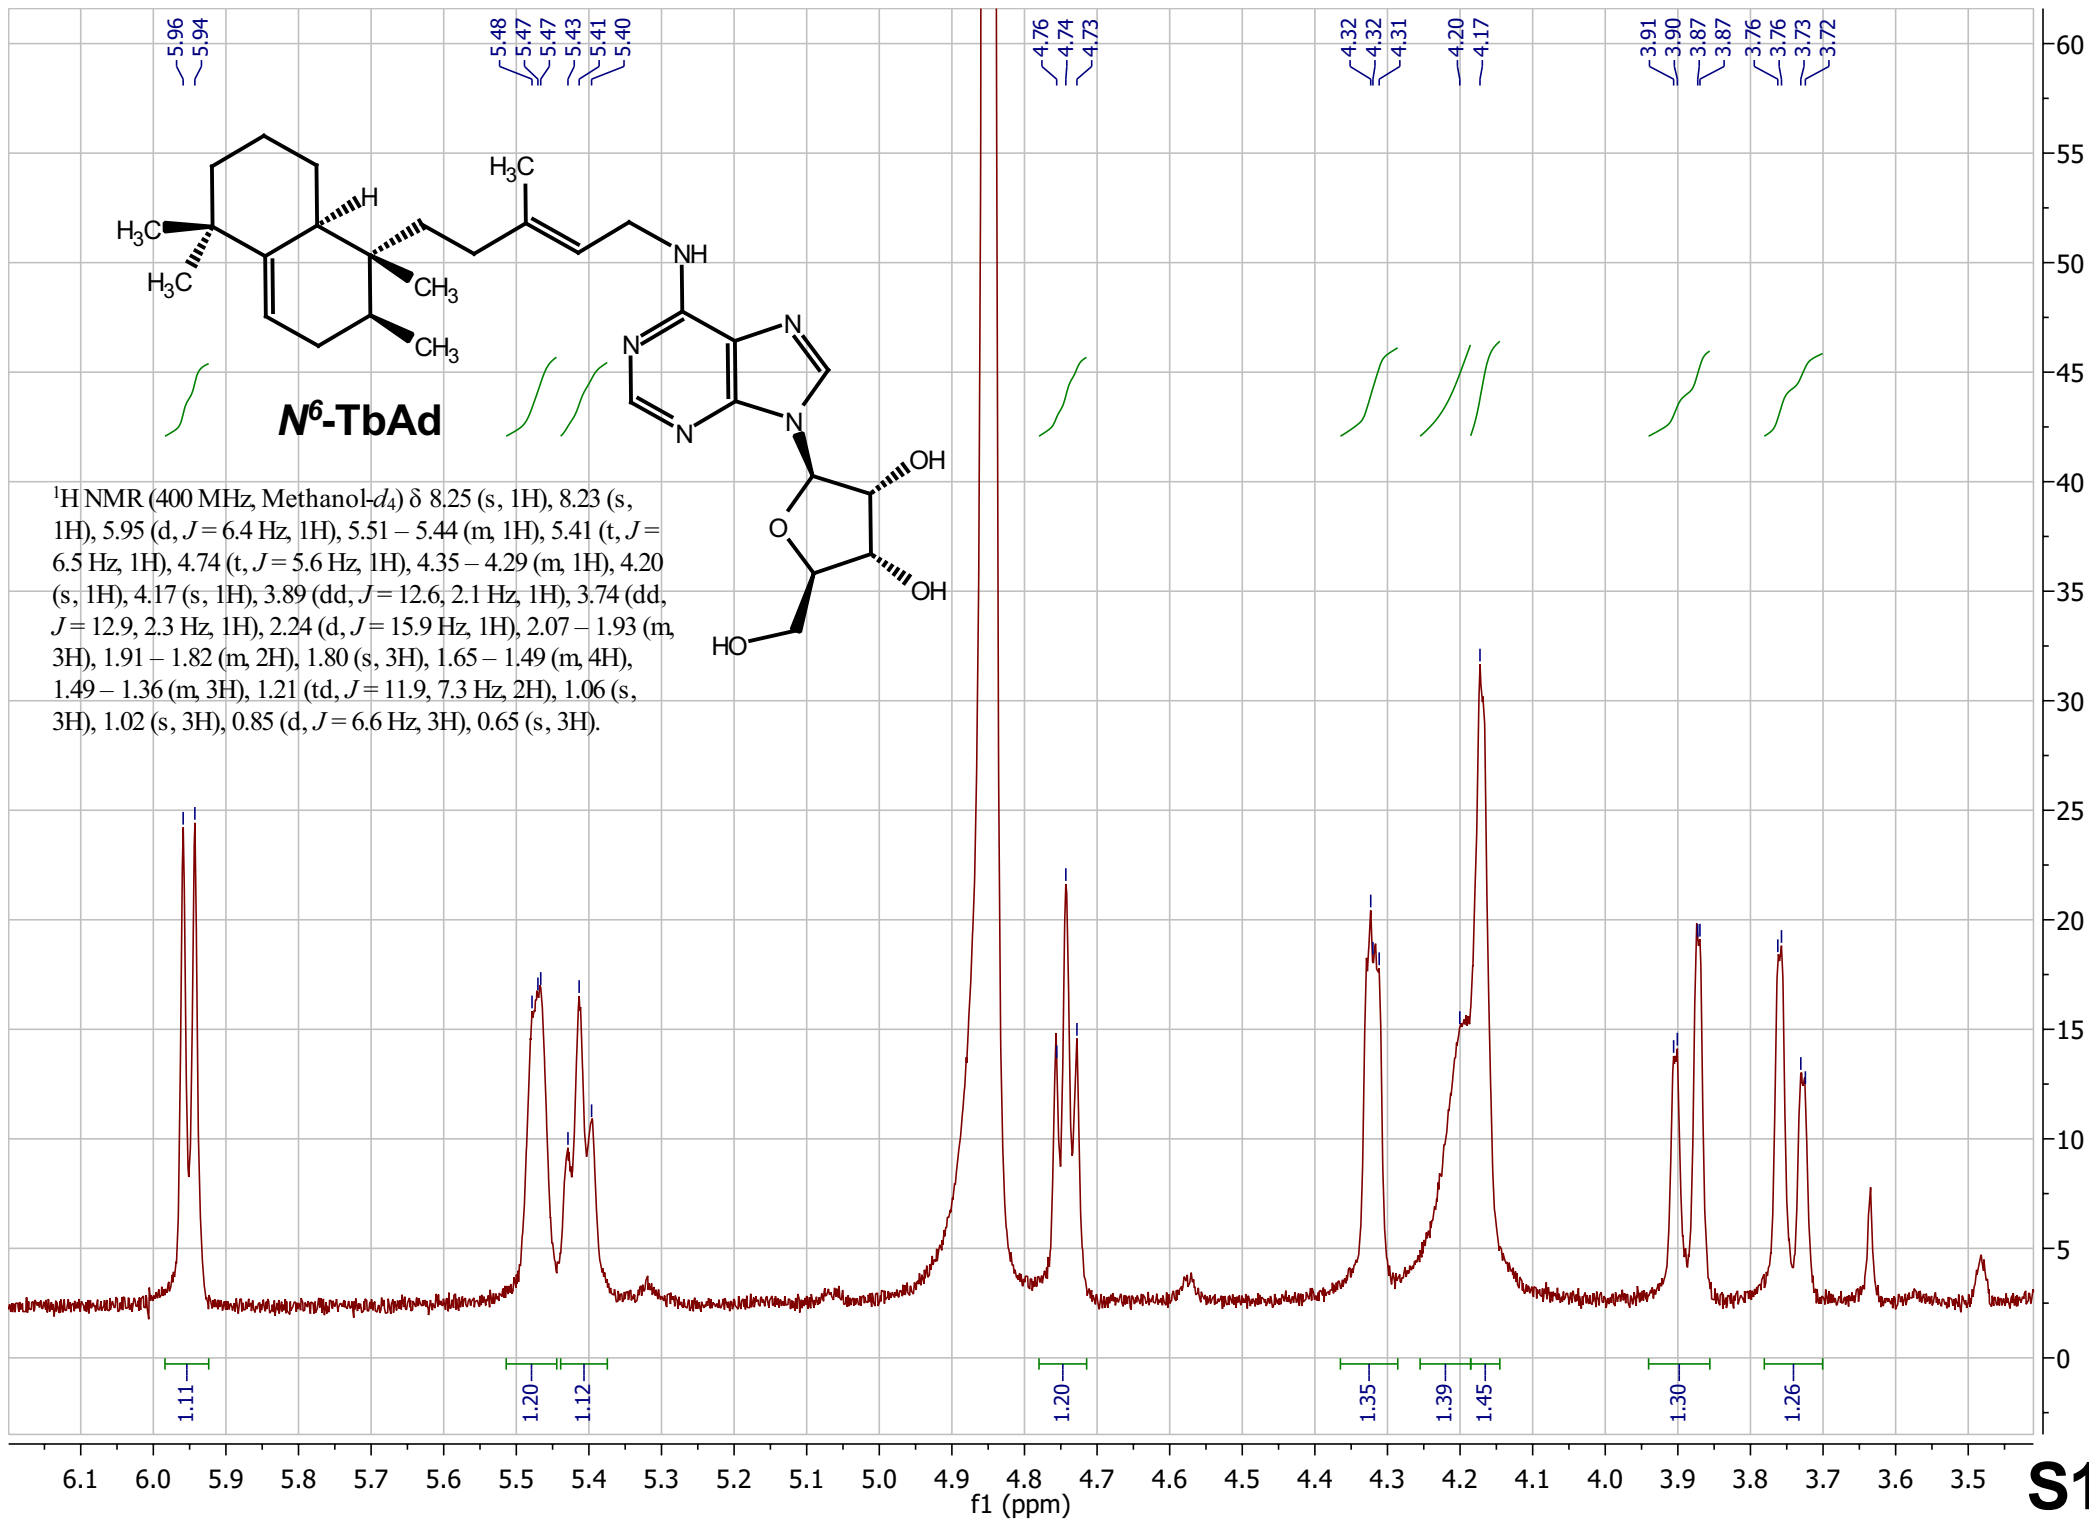



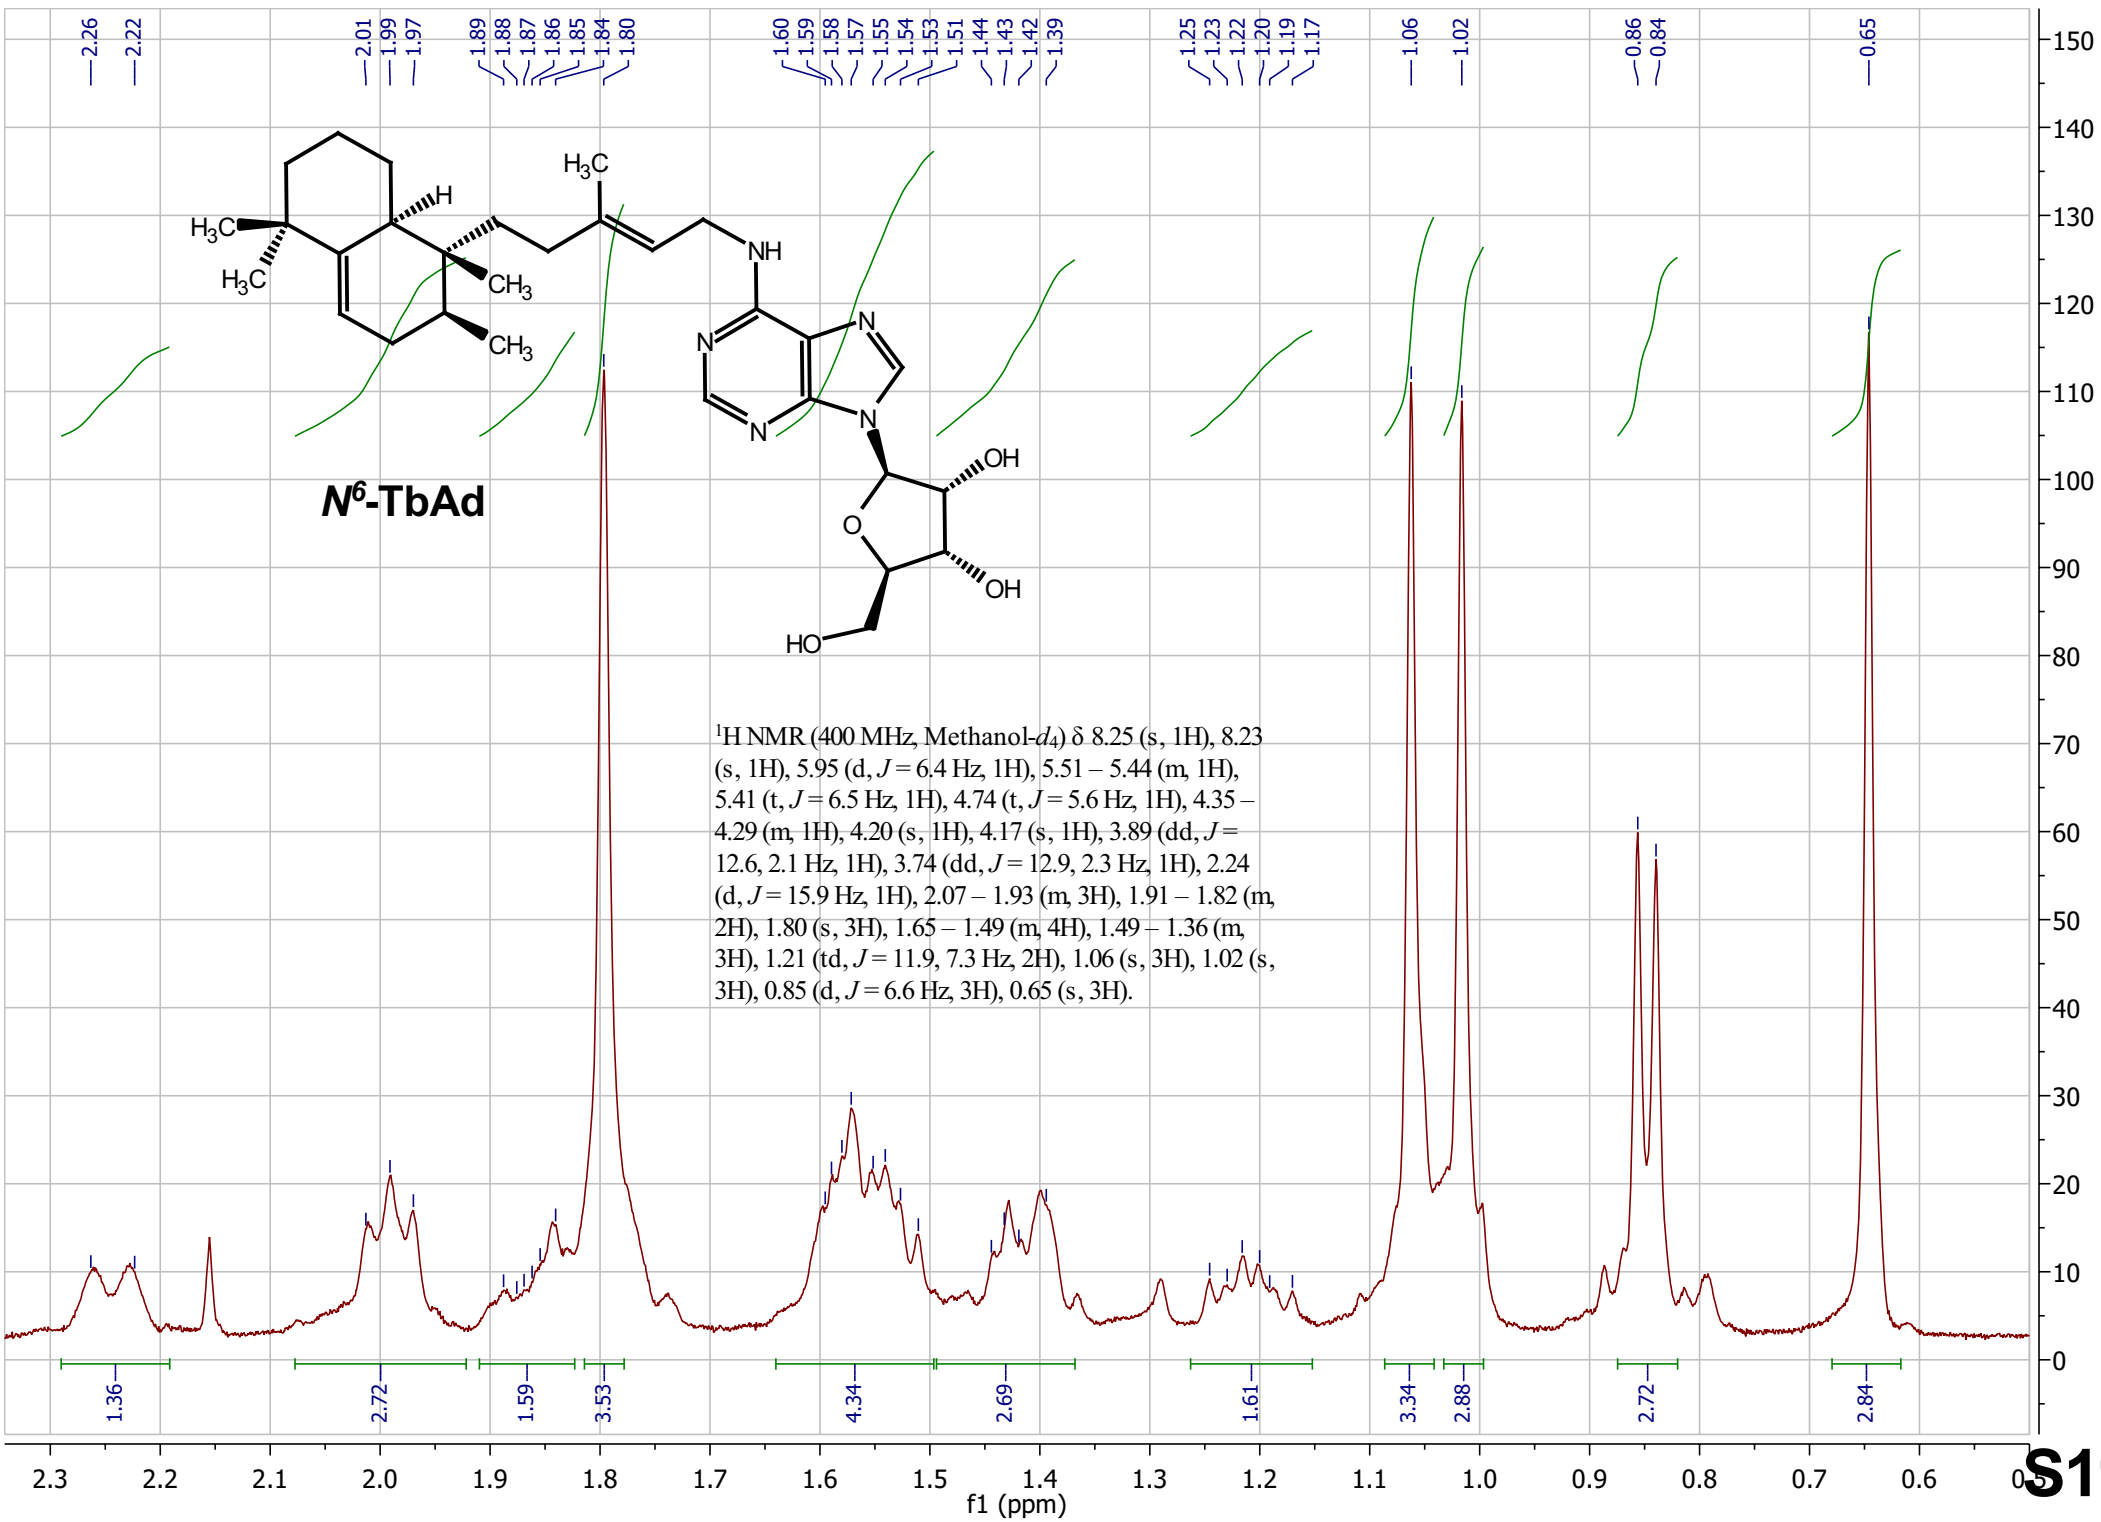

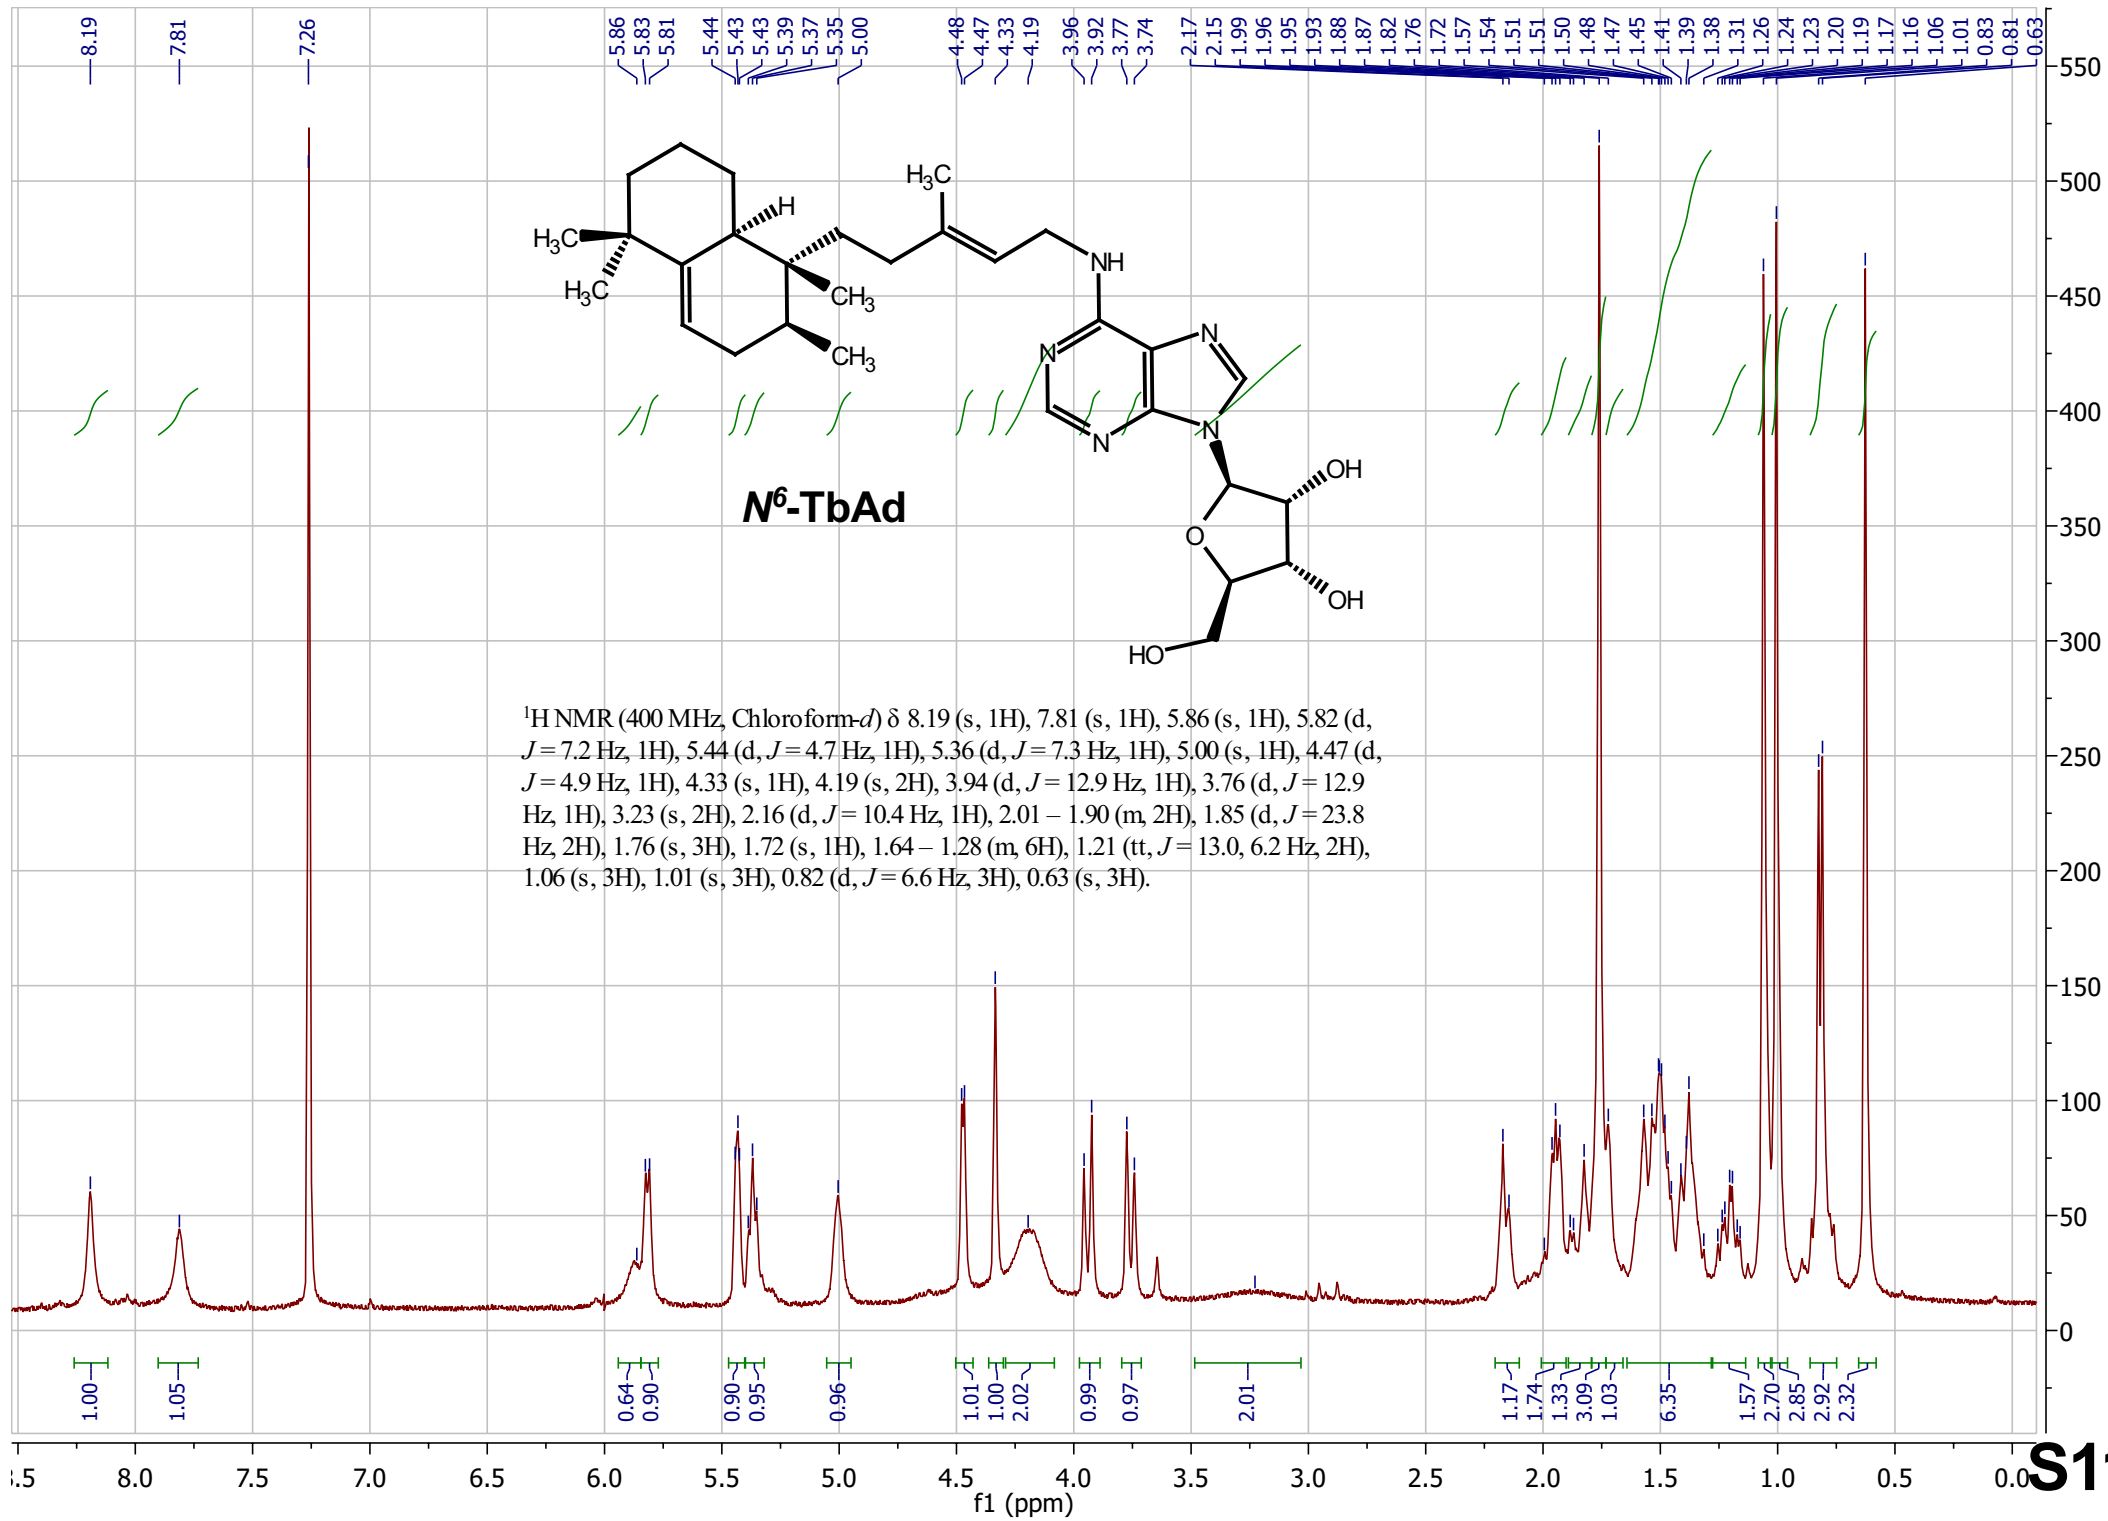

**S114**

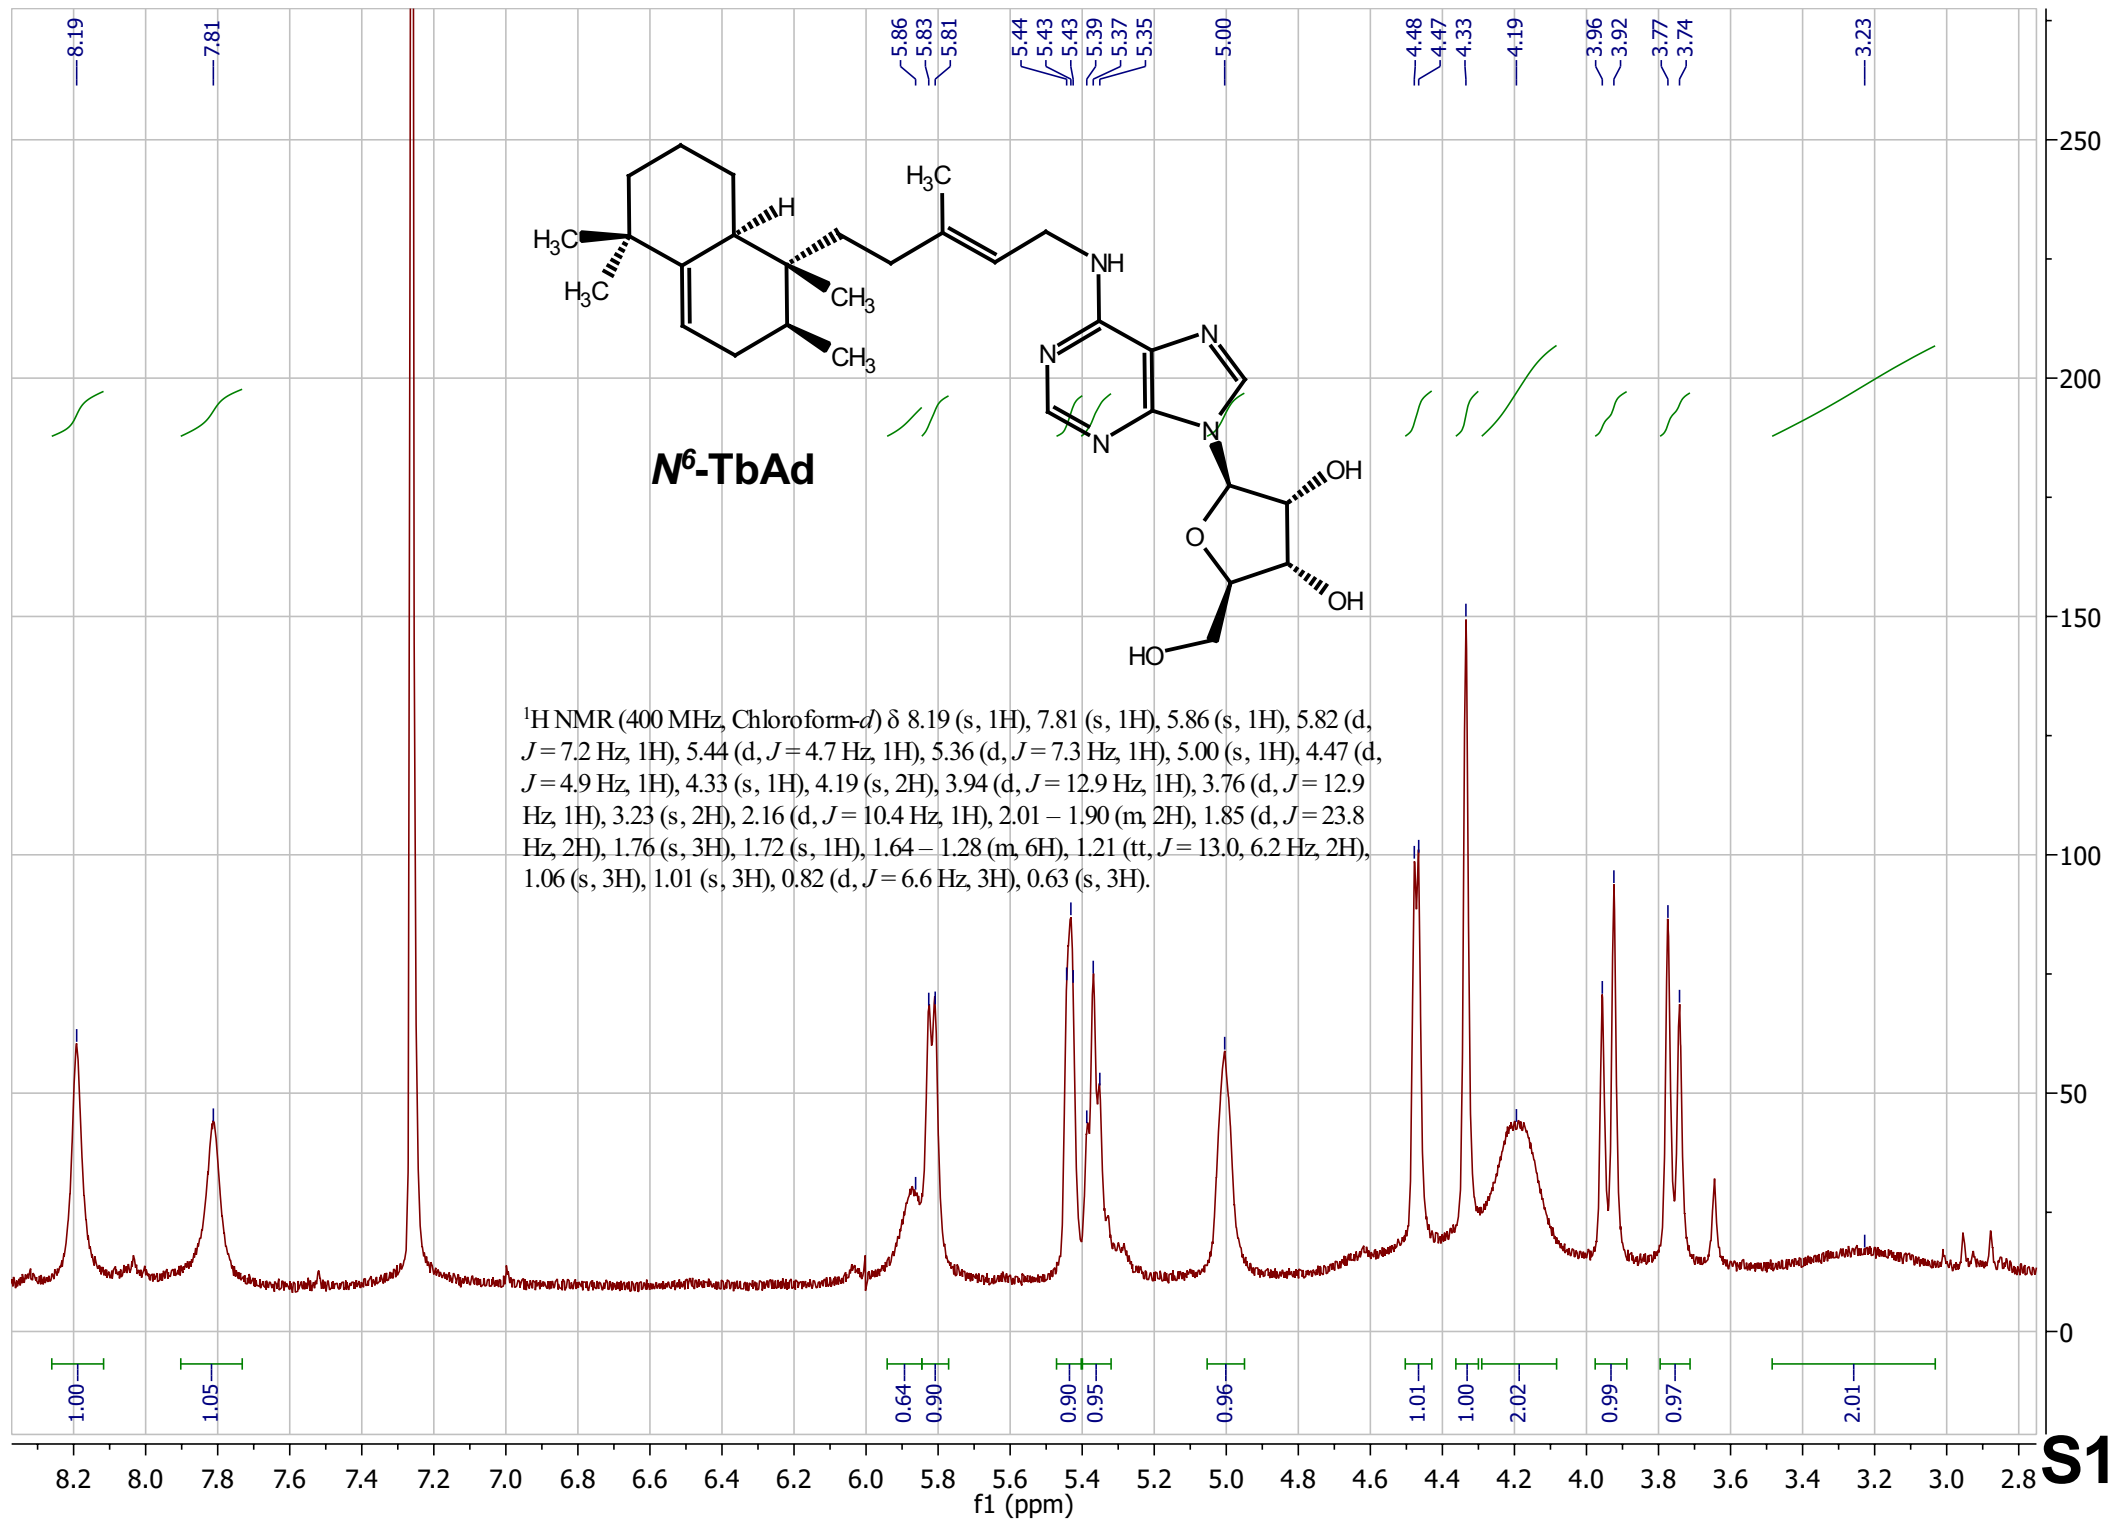

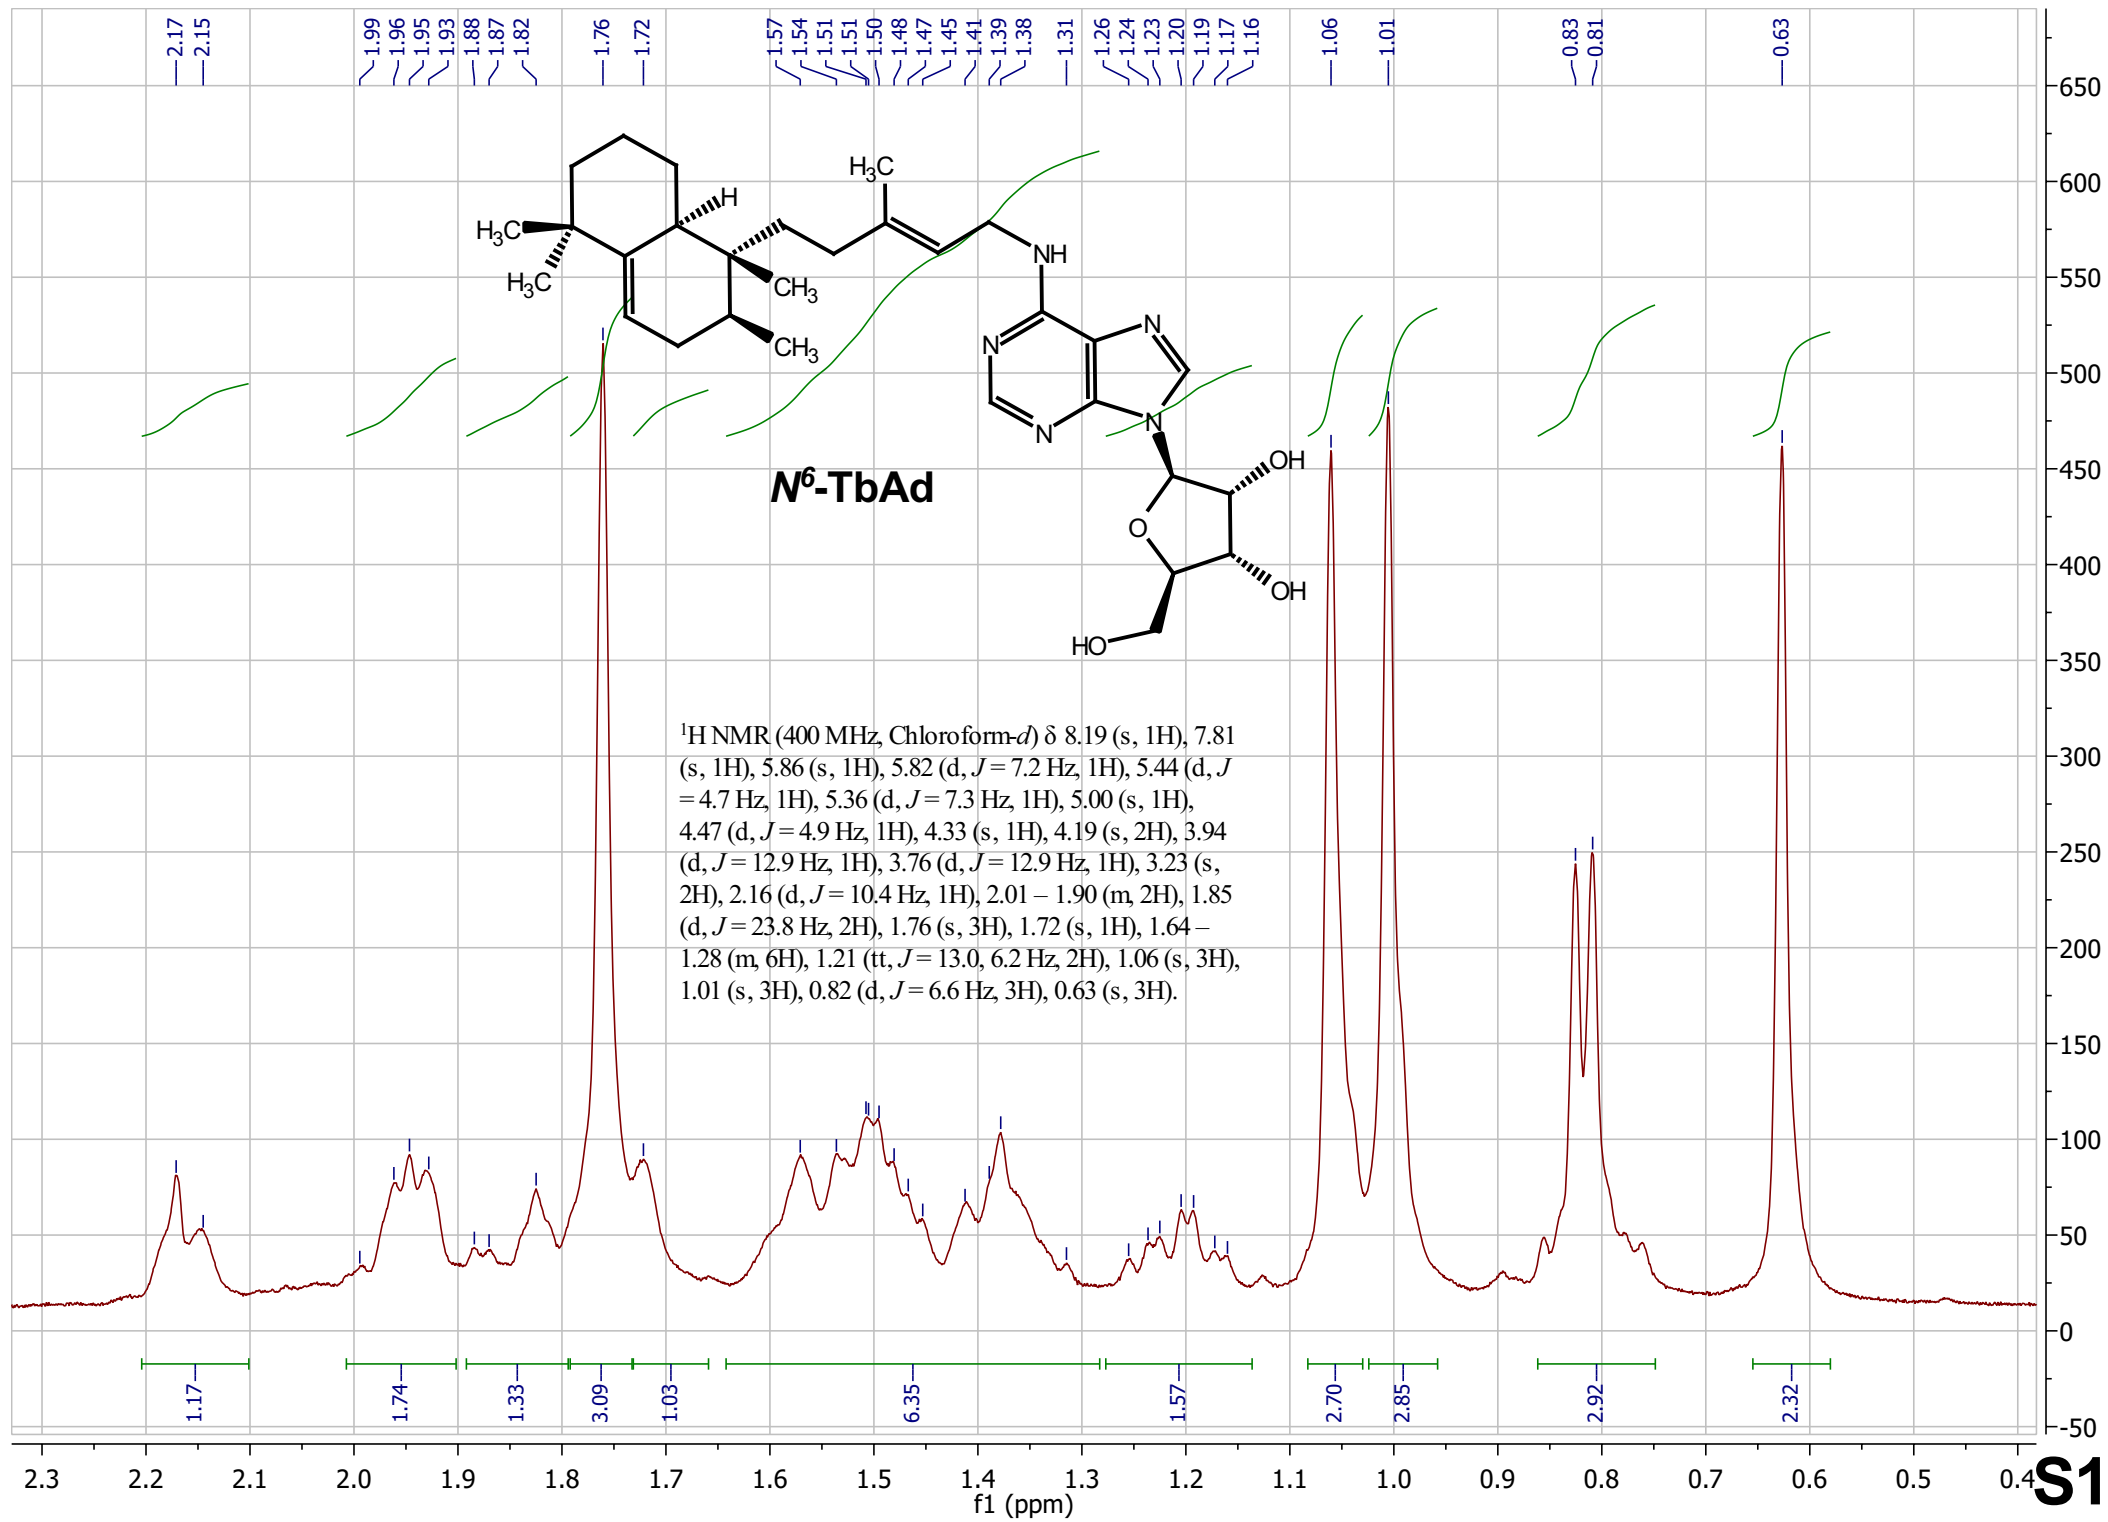

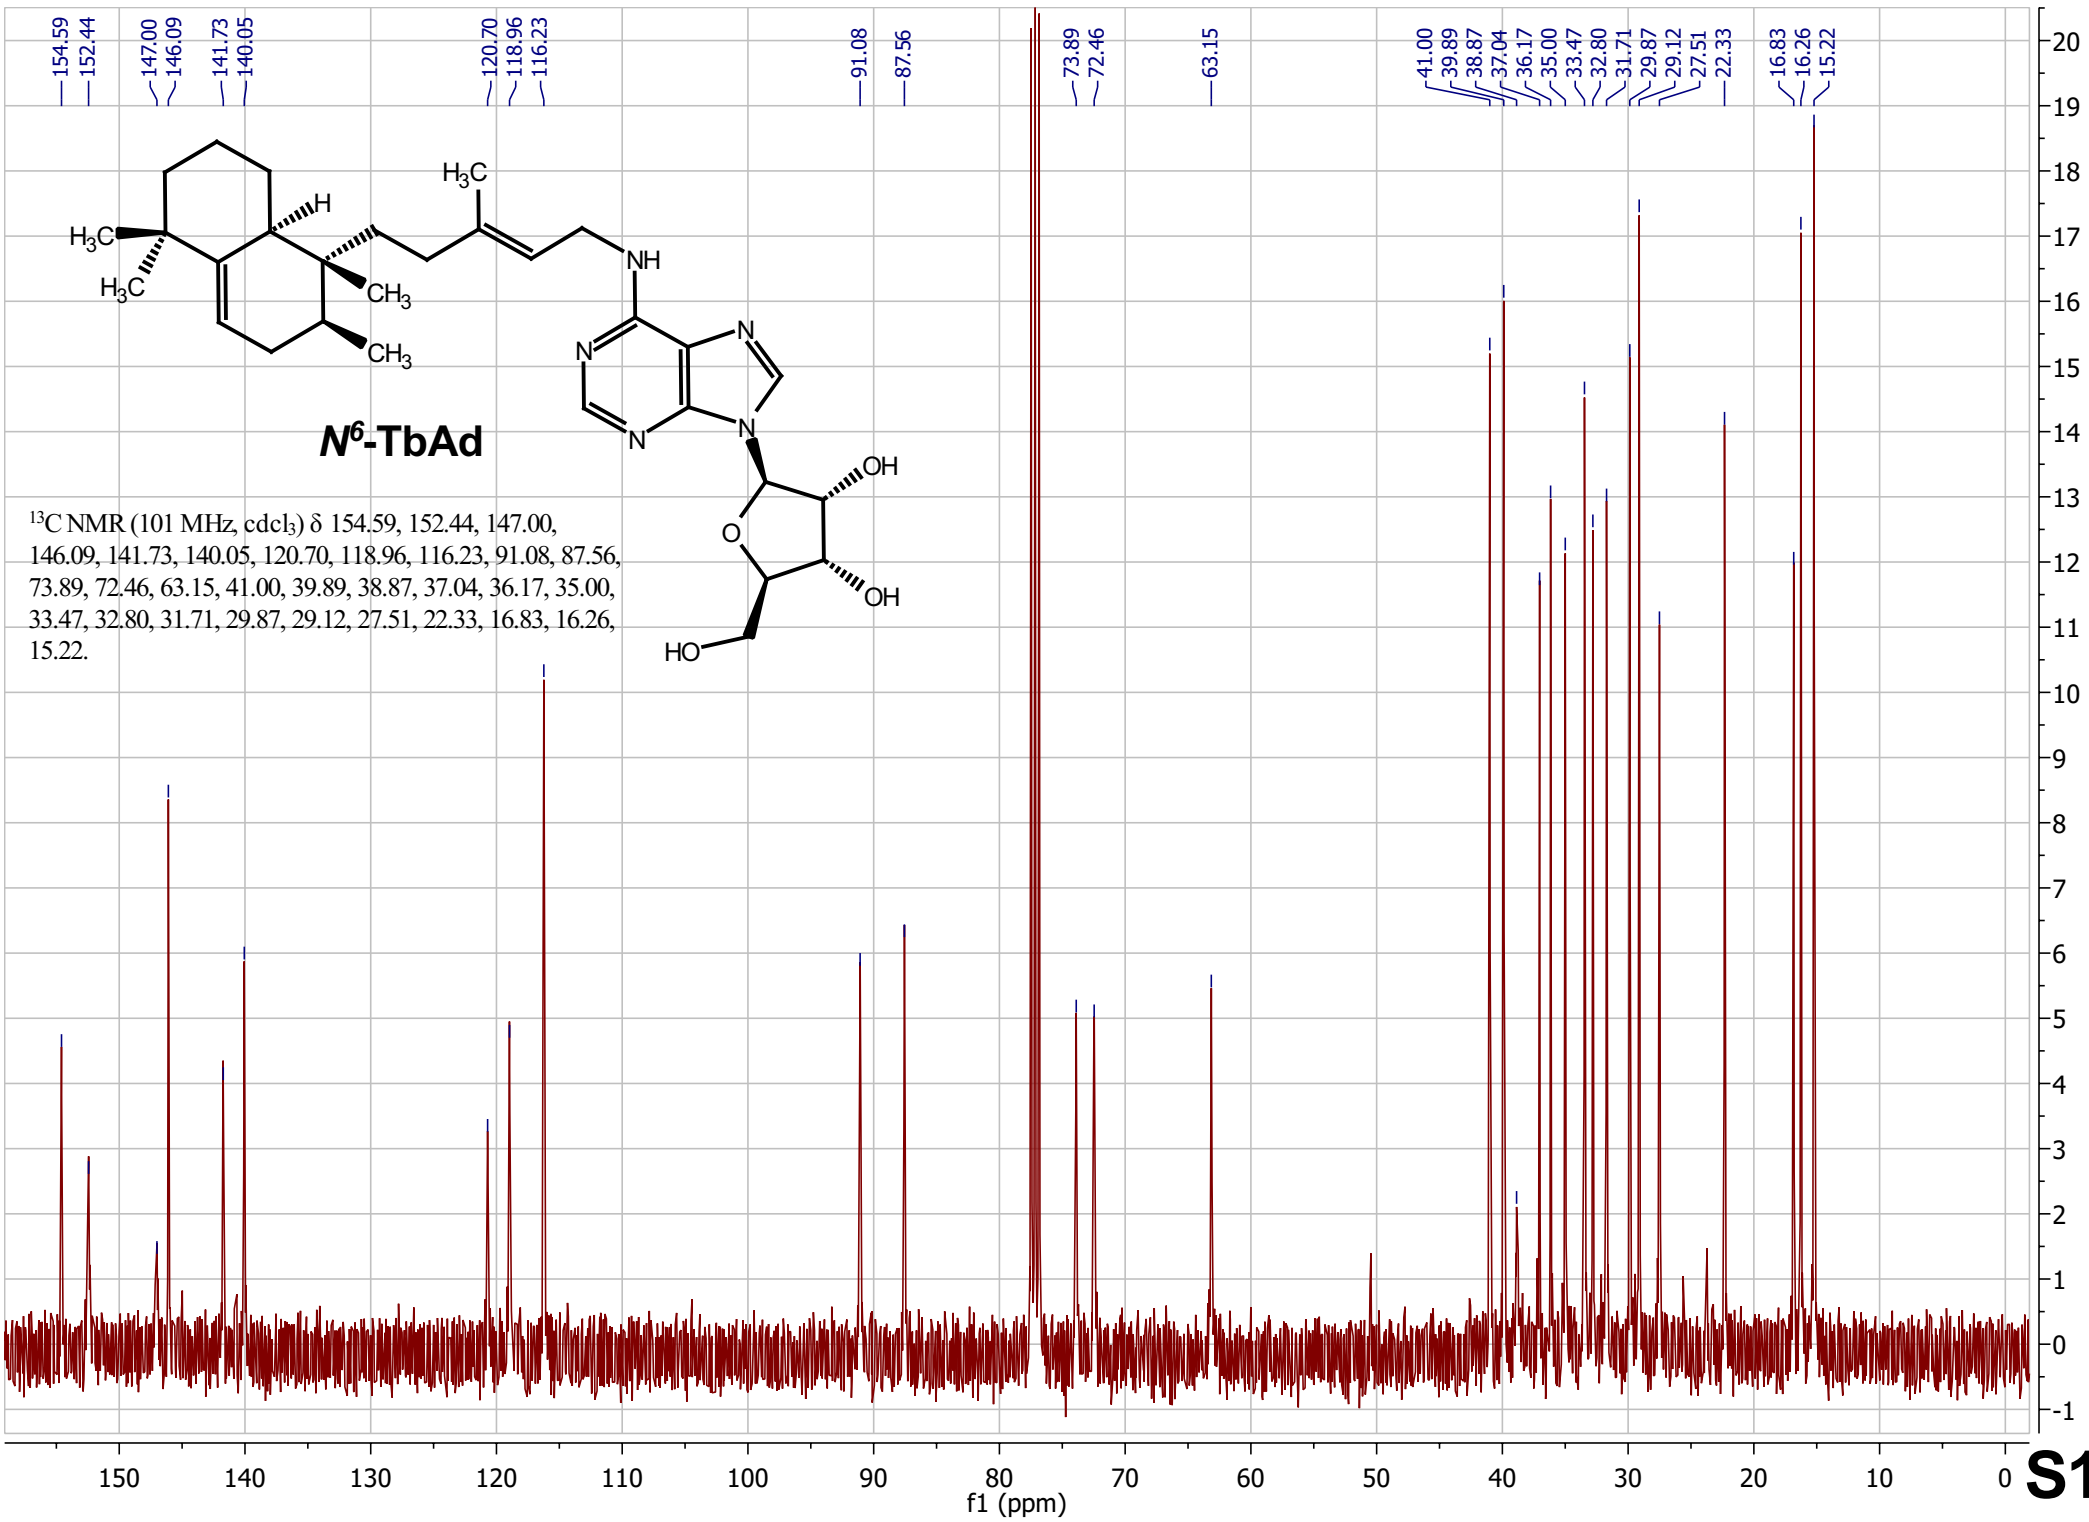

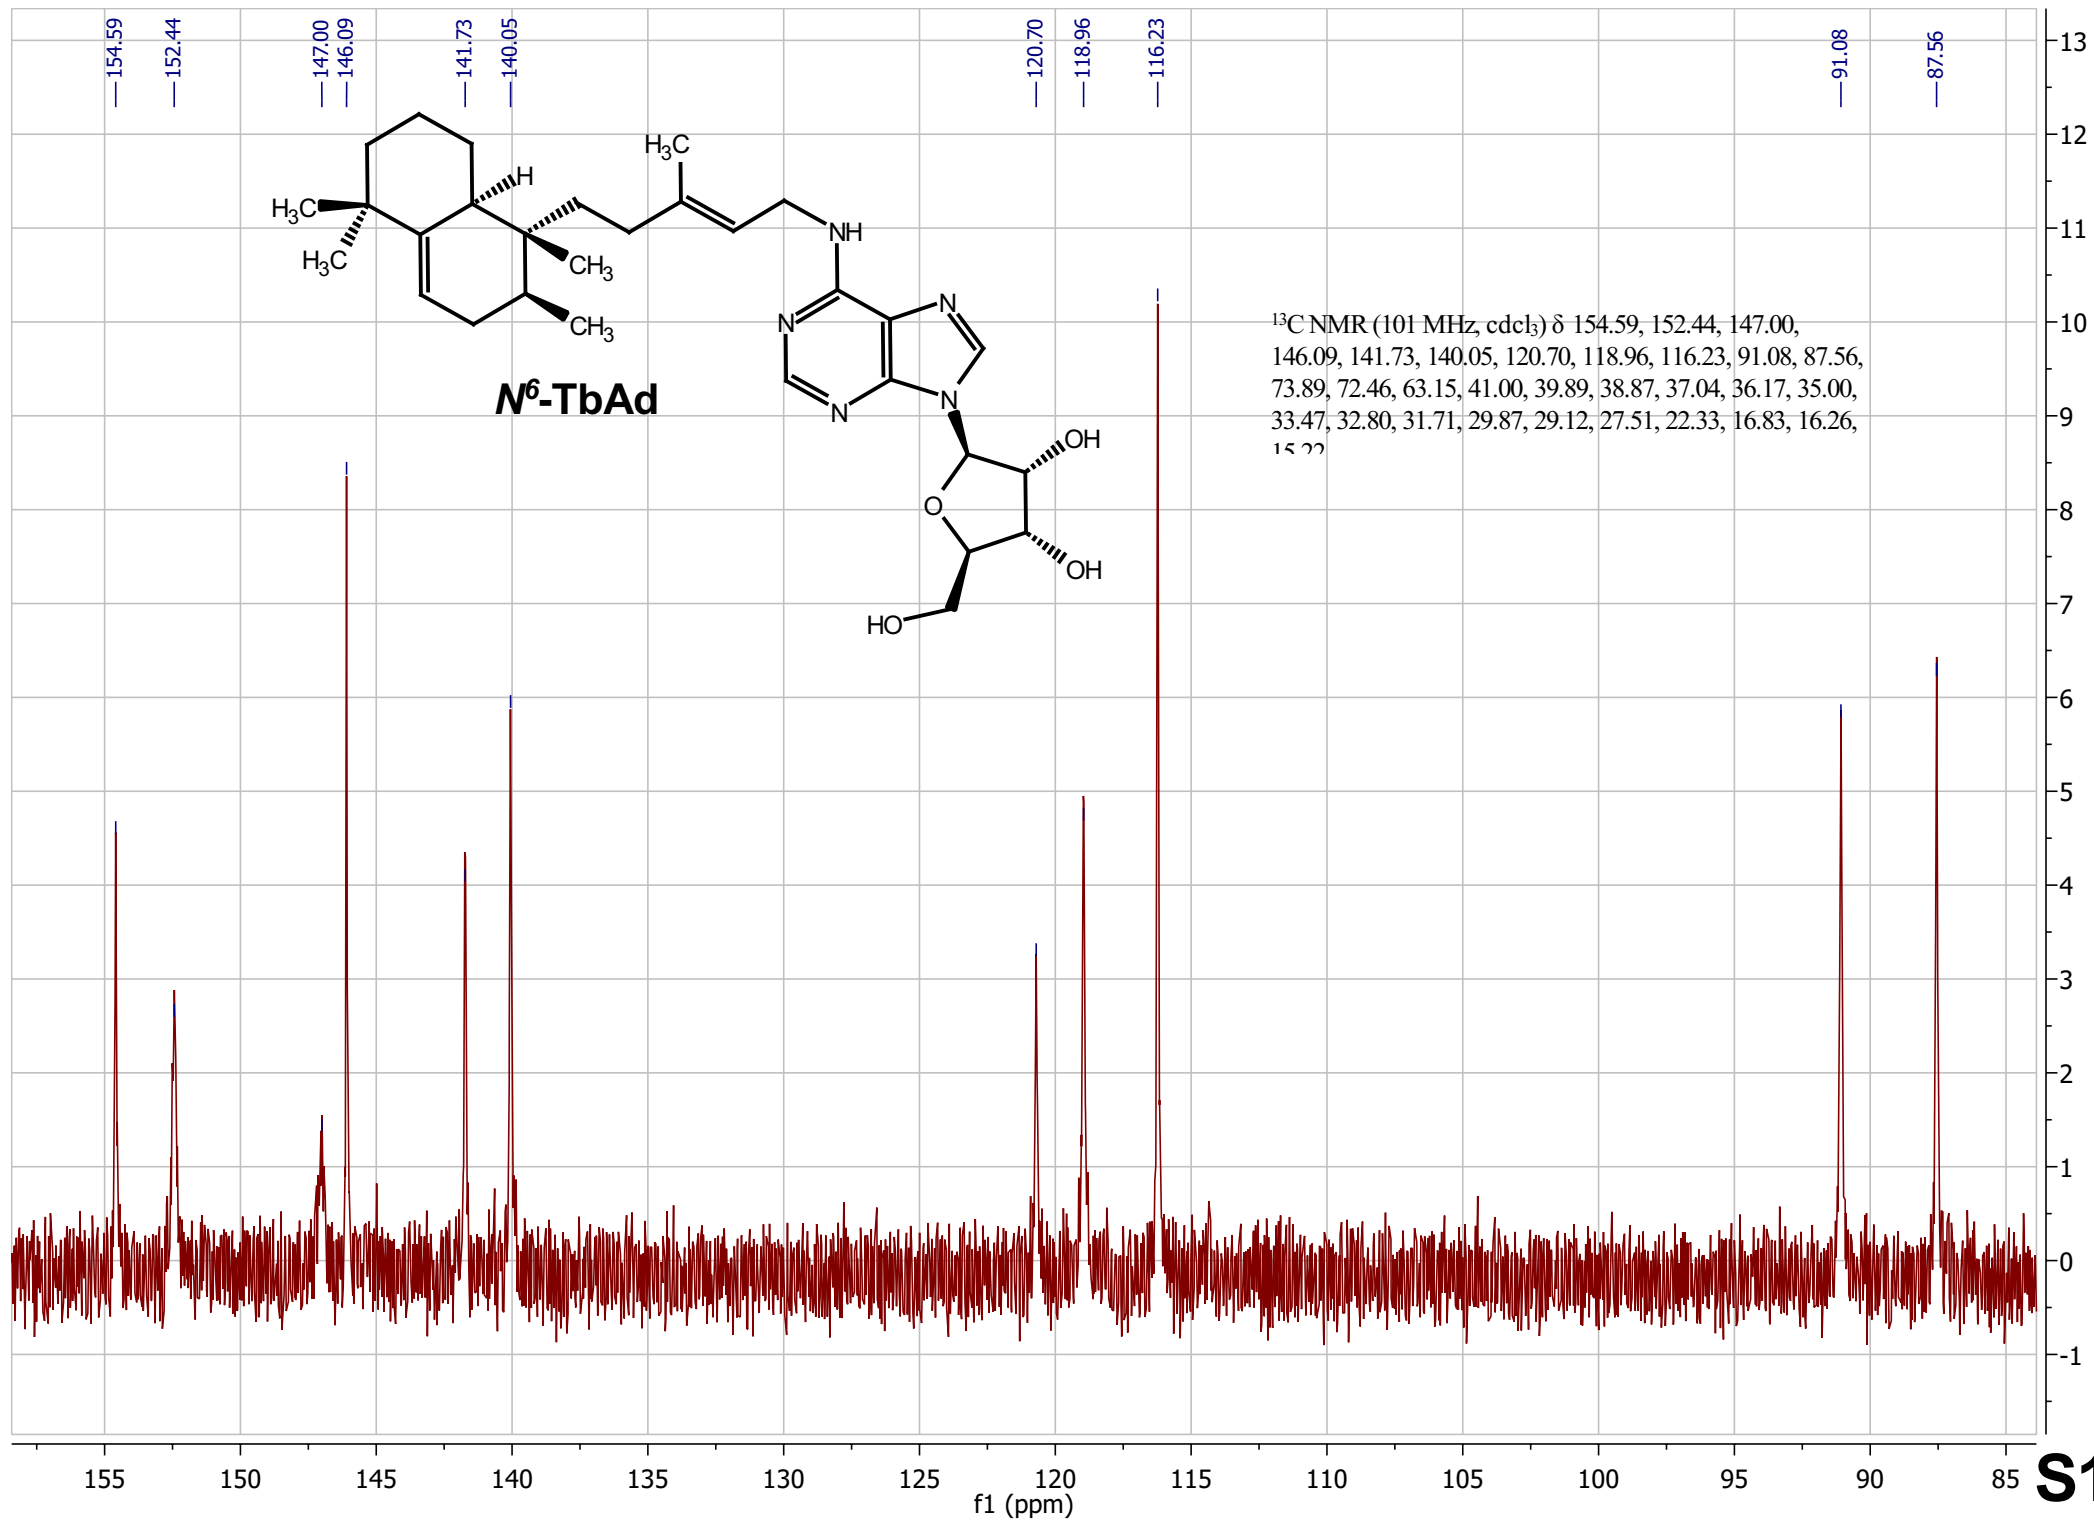

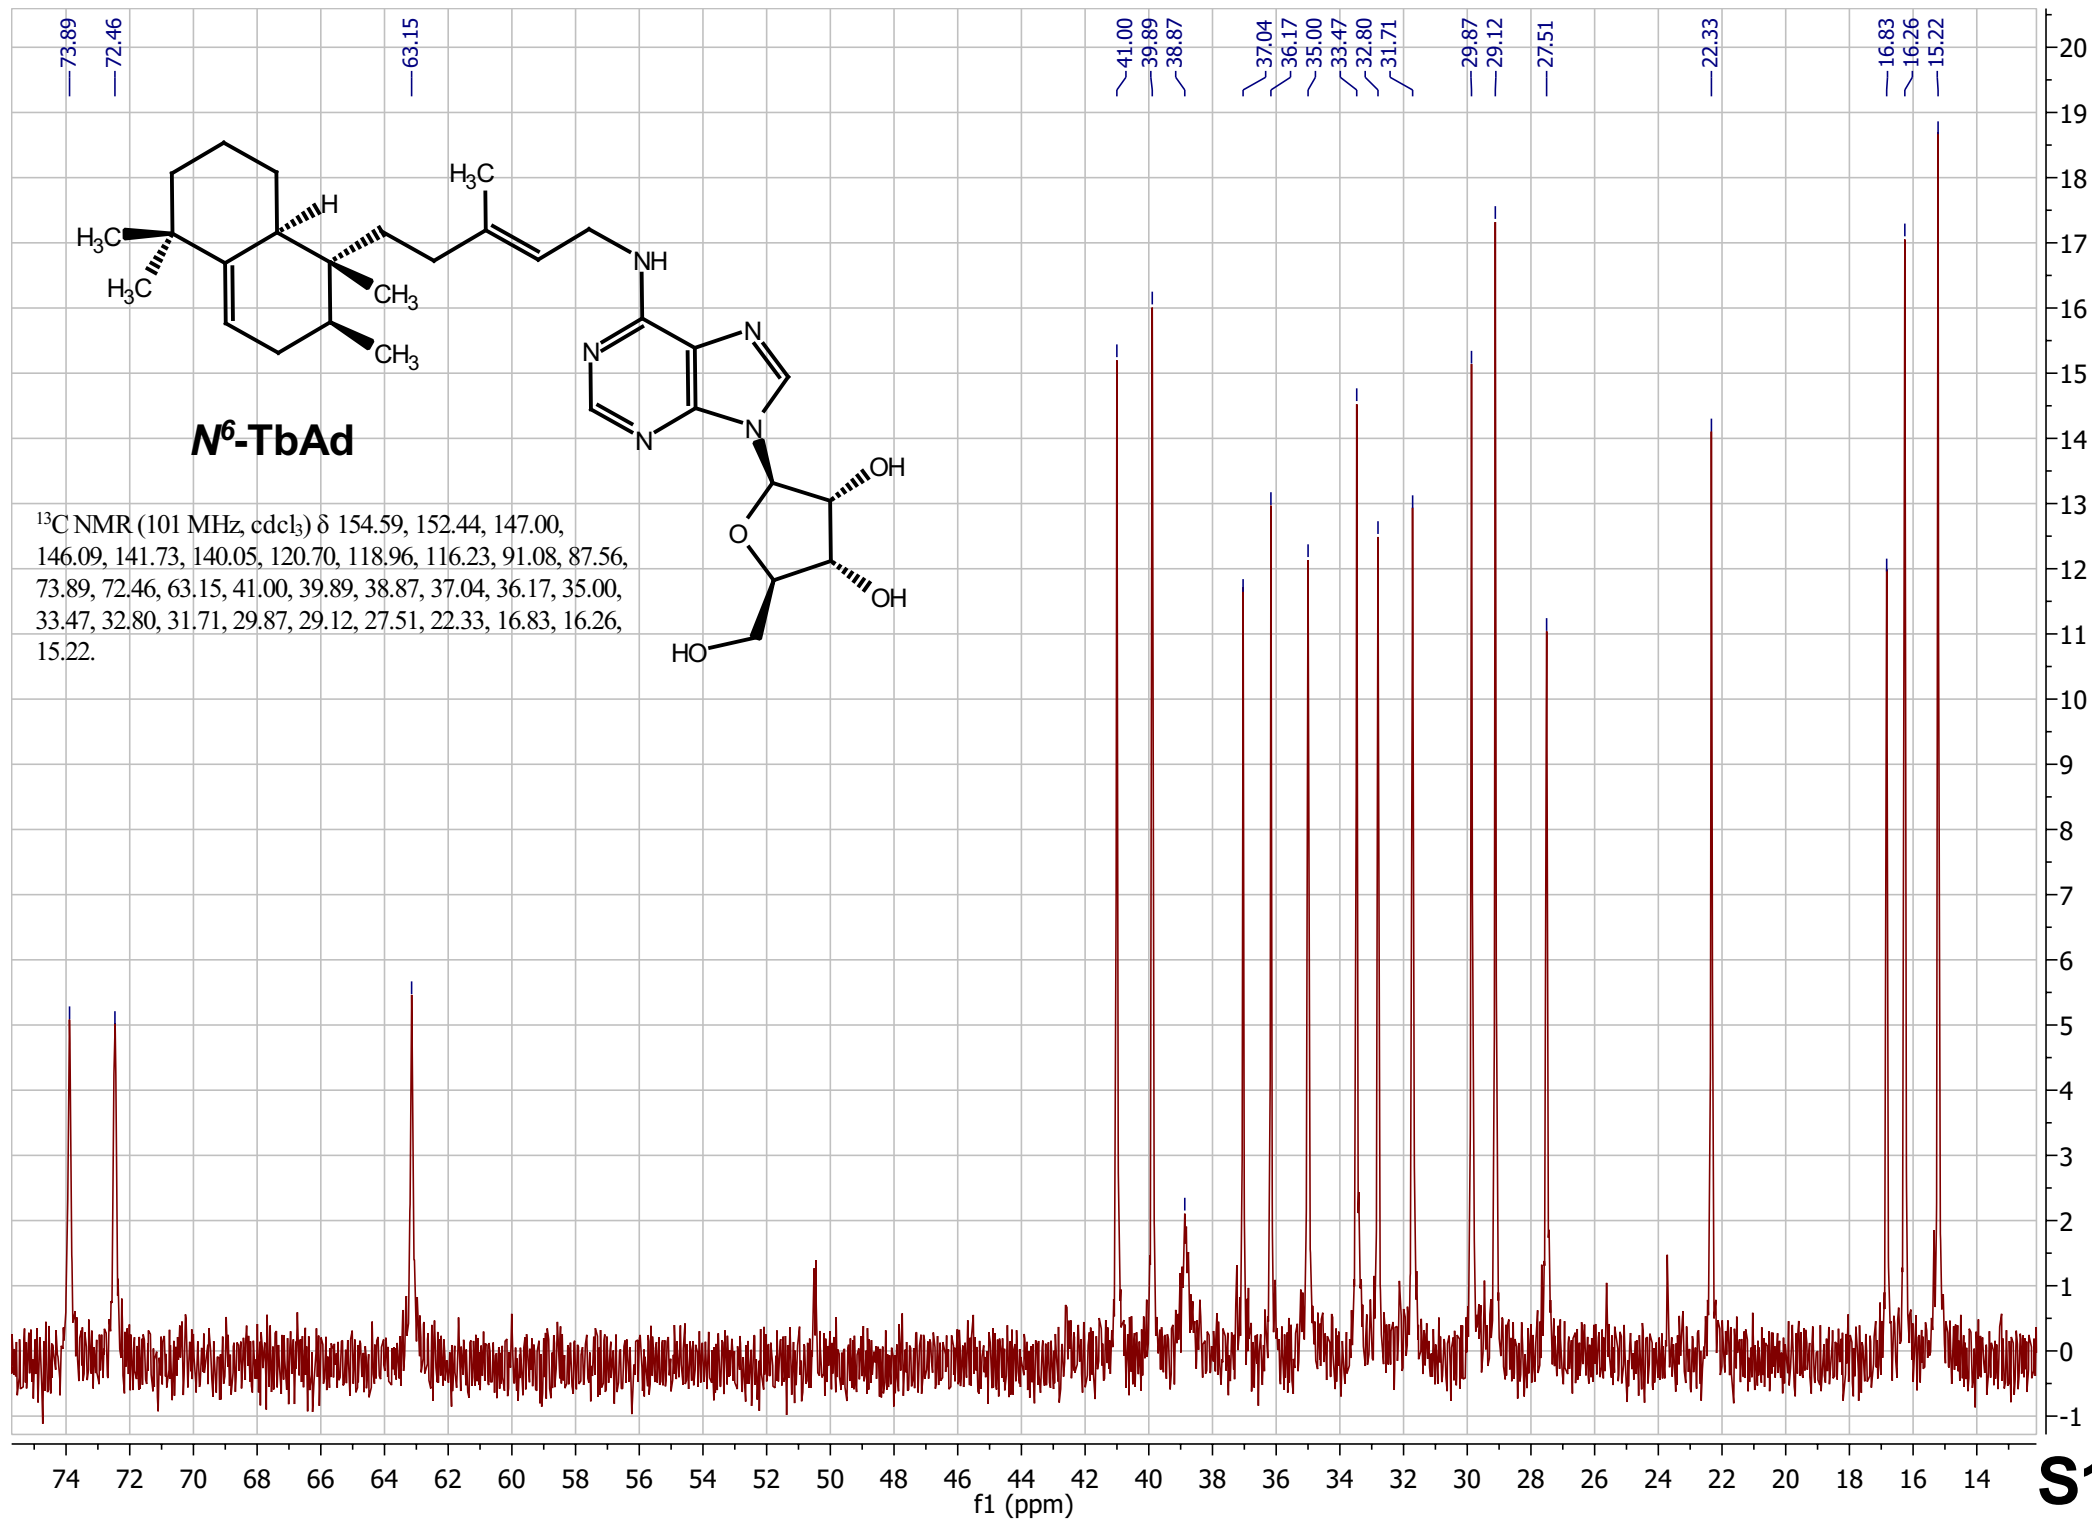

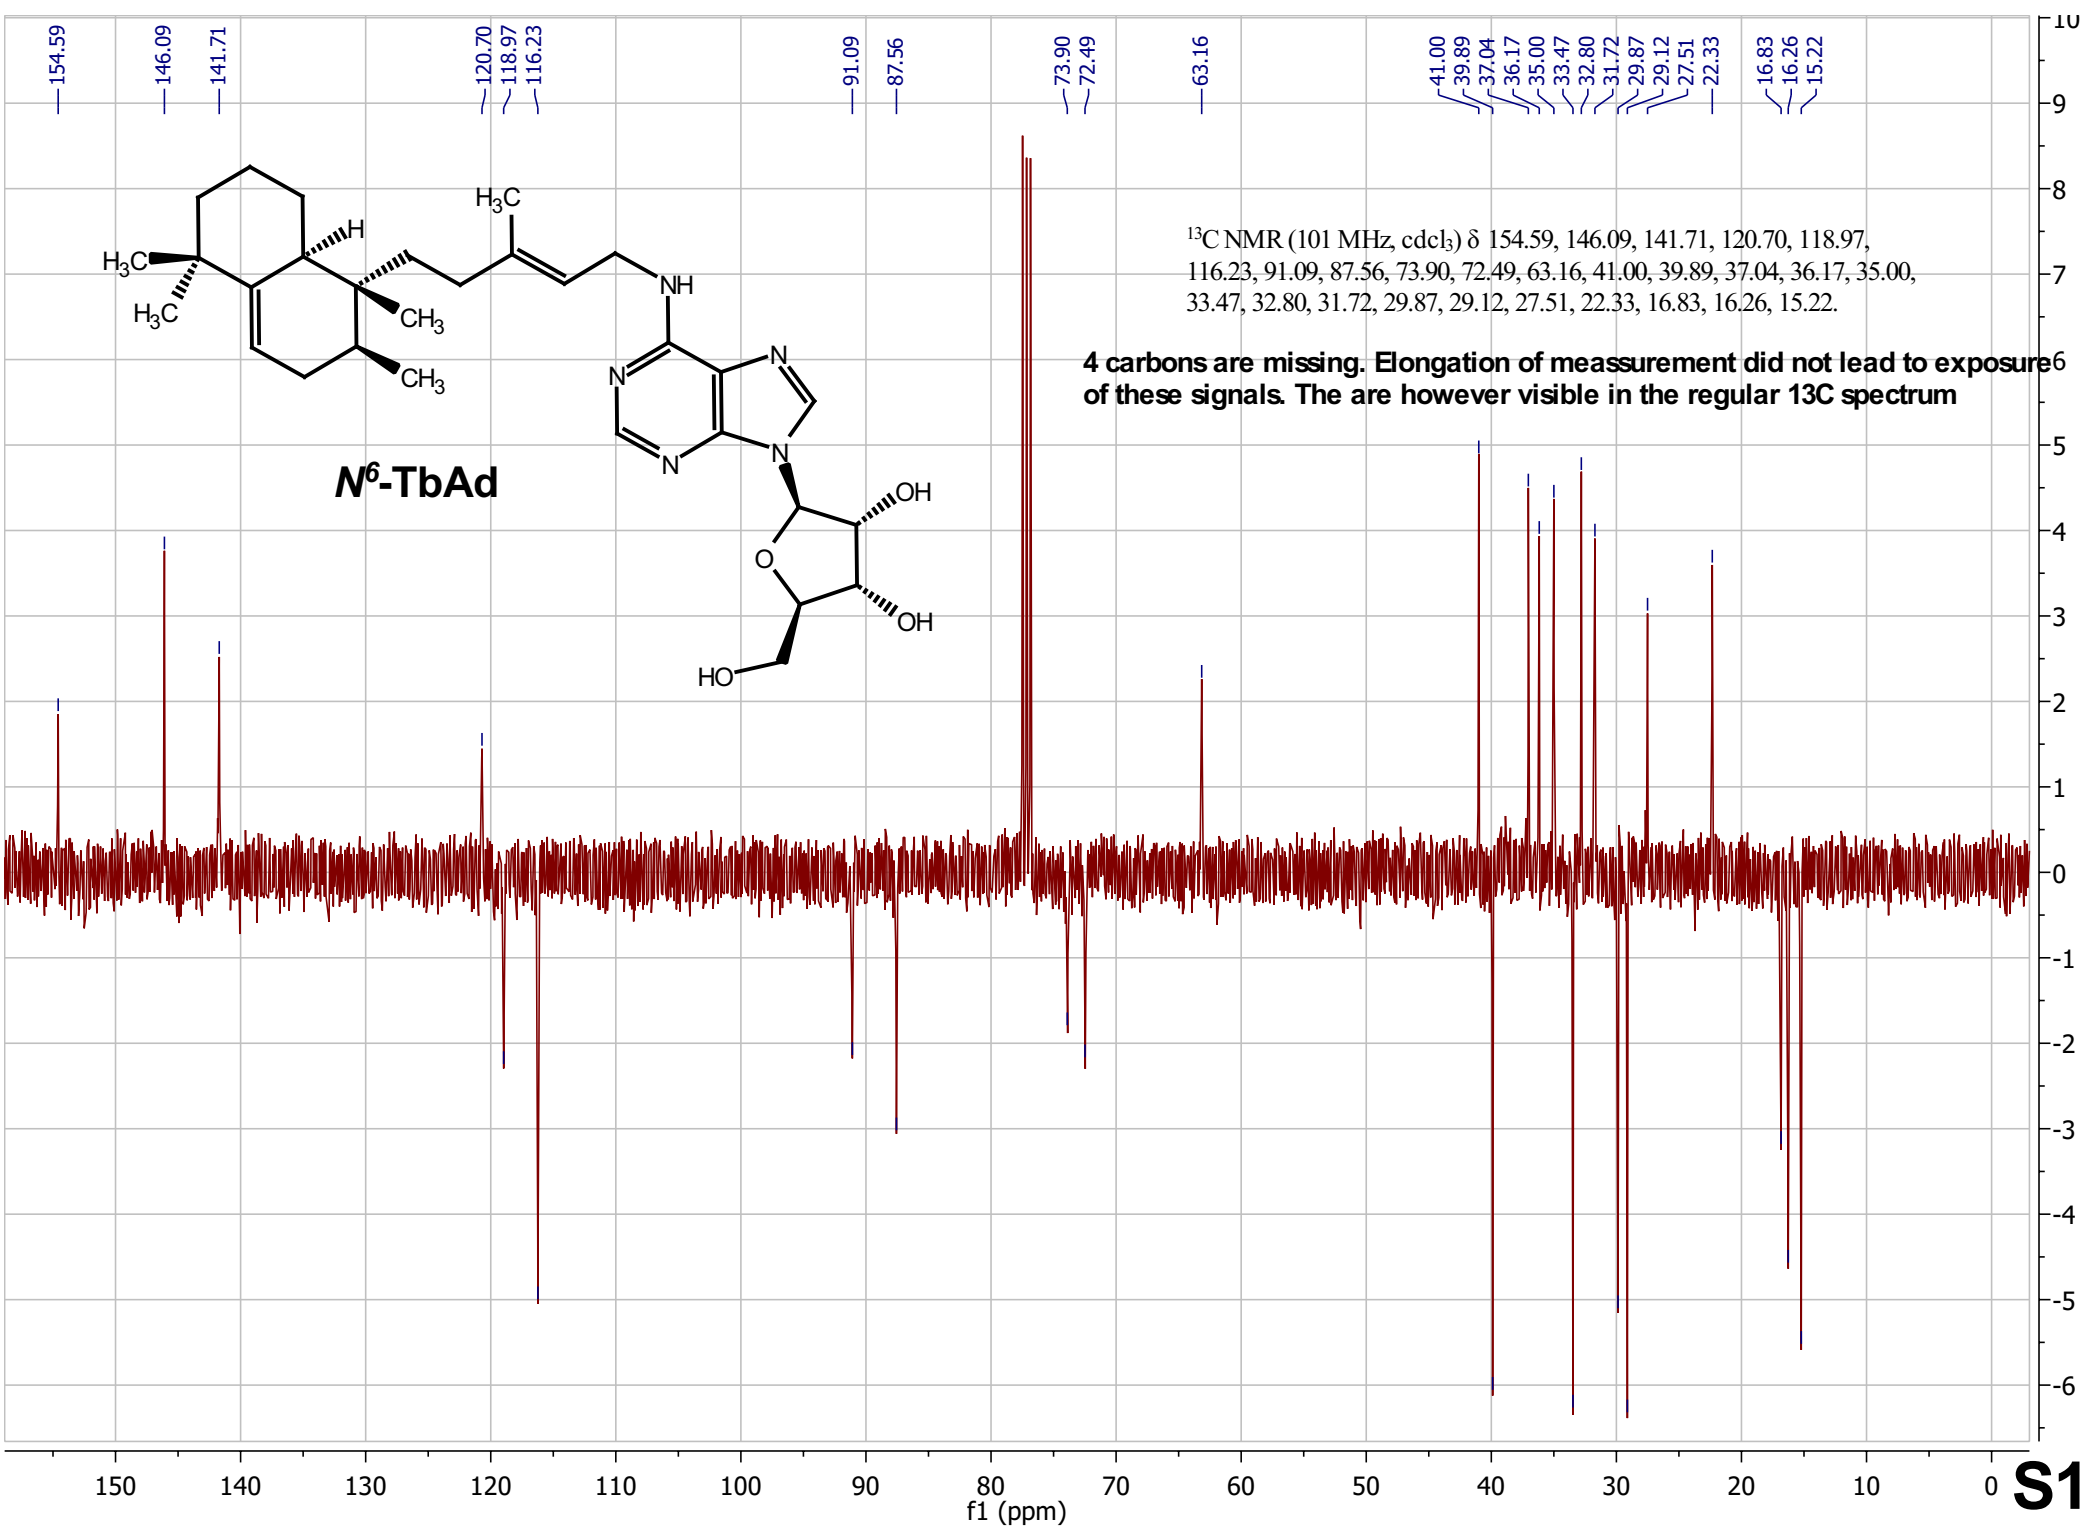



# 2'-deoxy 1-TbAd

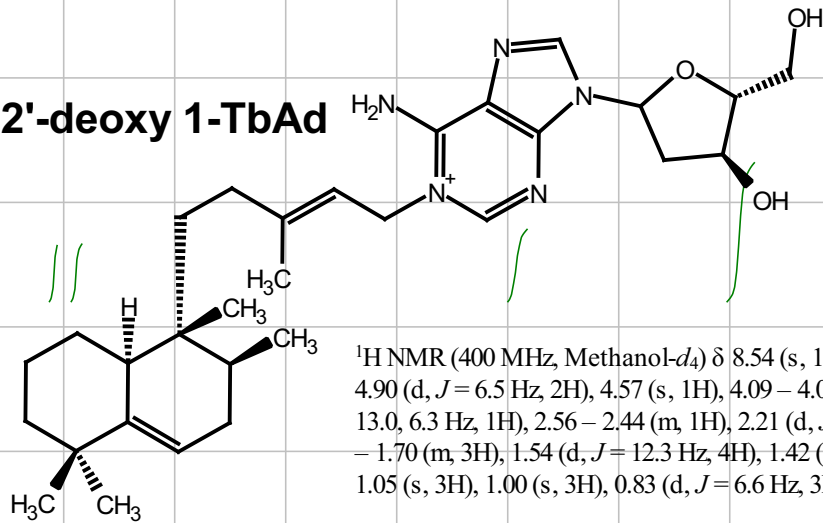

$^1\text{H NMR}$  (400 MHz, Methanol- $d_4$ )  $\delta$  8.54 (s, 1H), 8.44 (s, 1H), 6.46 (t,  $J = 6.5$  Hz, 1H), 5.46 (s, 2H), 4.90 (d,  $J = 6.5$  Hz, 2H), 4.57 (s, 1H), 4.09 – 4.01 (m, 1H), 3.77 (qd,  $J = 12.1, 3.5$  Hz, 2H), 2.76 (dt,  $J = 13.0, 6.3$  Hz, 1H), 2.56 – 2.44 (m, 1H), 2.21 (d,  $J = 12.5$  Hz, 2H), 2.11 – 1.99 (m, 2H), 1.89 (s, 3H), 1.86 – 1.70 (m, 3H), 1.54 (d,  $J = 12.3$  Hz, 4H), 1.42 (dd,  $J = 17.1, 8.8$  Hz, 2H), 1.19 (td,  $J = 12.3, 5.8$  Hz, 1H), 1.05 (s, 3H), 1.00 (s, 3H), 0.83 (d,  $J = 6.6$  Hz, 3H), 0.64 (s, 3H).

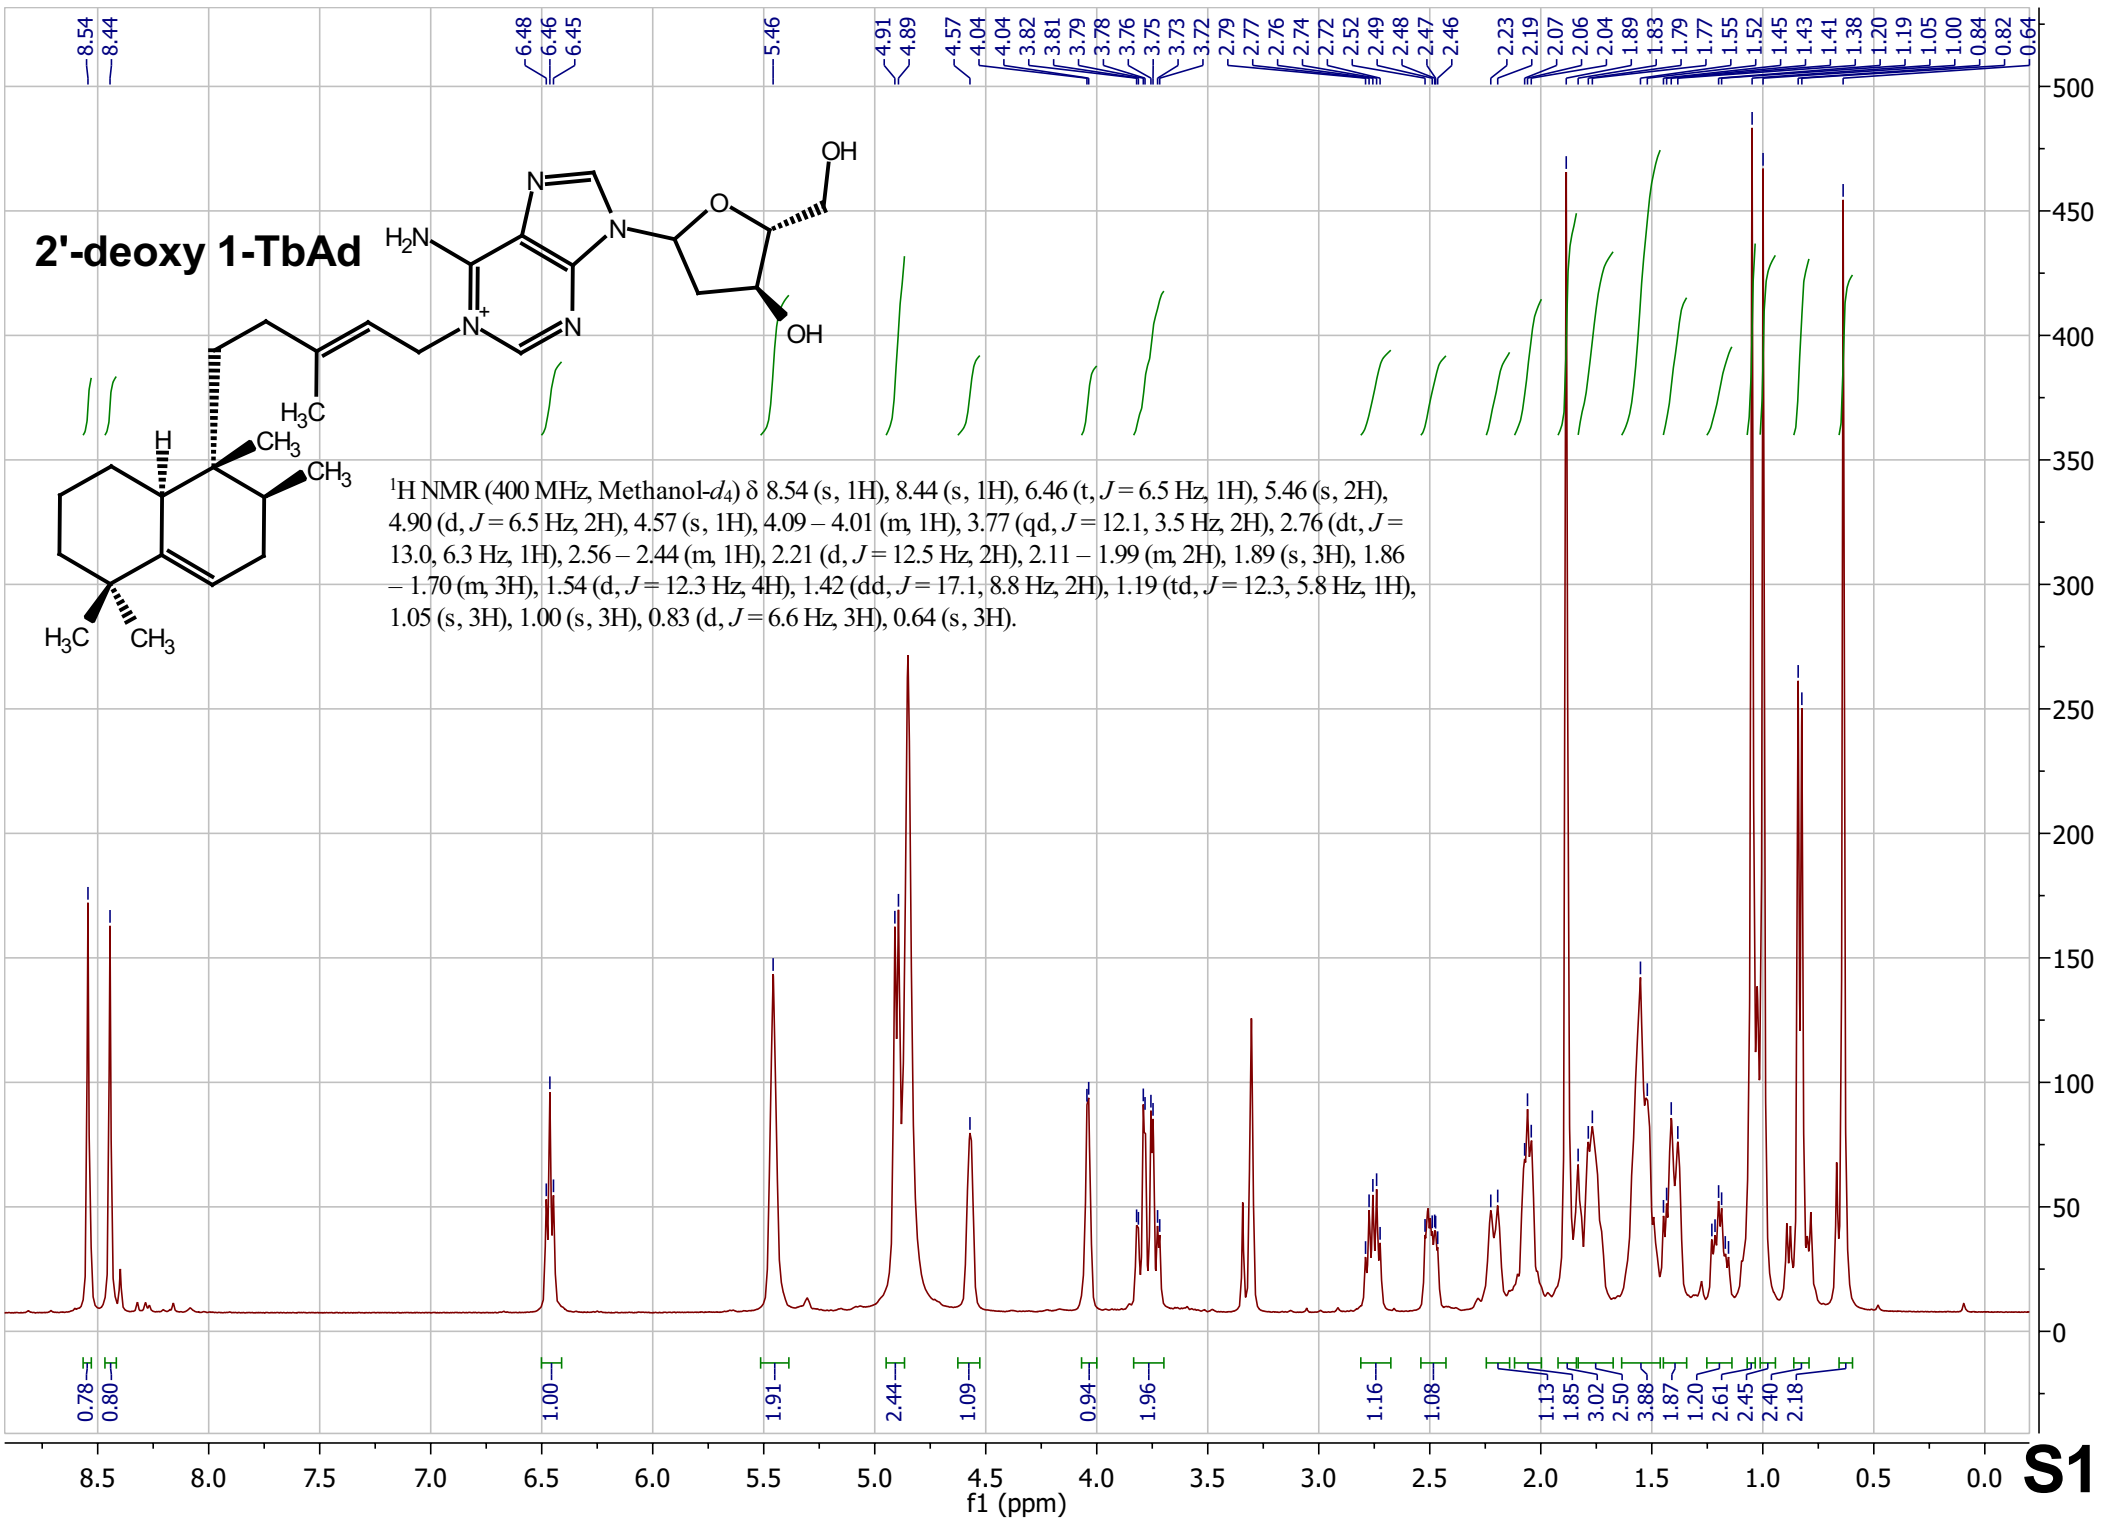

# 2'-deoxy 1-TbAd

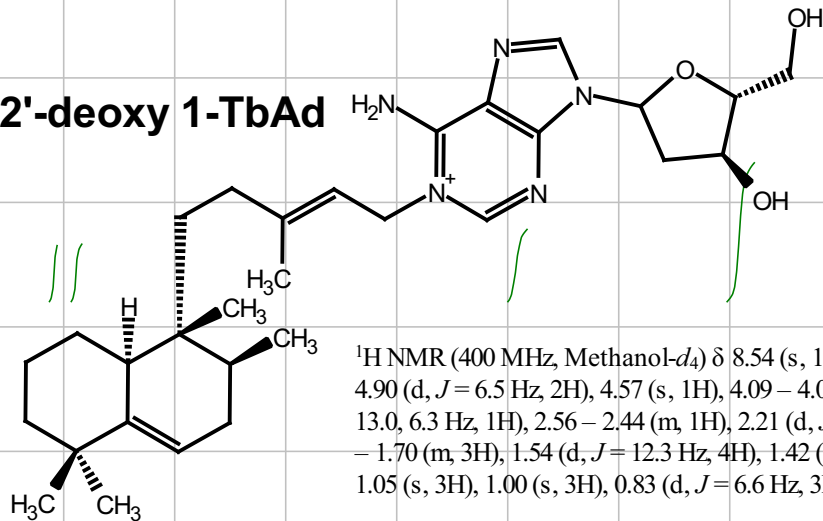

$^1\text{H NMR}$  (400 MHz, Methanol- $d_4$ )  $\delta$  8.54 (s, 1H), 8.44 (s, 1H), 6.46 (t,  $J = 6.5$  Hz, 1H), 5.46 (s, 2H), 4.90 (d,  $J = 6.5$  Hz, 2H), 4.57 (s, 1H), 4.09 – 4.01 (m, 1H), 3.77 (qd,  $J = 12.1, 3.5$  Hz, 2H), 2.76 (dt,  $J = 13.0, 6.3$  Hz, 1H), 2.56 – 2.44 (m, 1H), 2.21 (d,  $J = 12.5$  Hz, 2H), 2.11 – 1.99 (m, 2H), 1.89 (s, 3H), 1.86 – 1.70 (m, 3H), 1.54 (d,  $J = 12.3$  Hz, 4H), 1.42 (dd,  $J = 17.1, 8.8$  Hz, 2H), 1.19 (td,  $J = 12.3, 5.8$  Hz, 1H), 1.05 (s, 3H), 1.00 (s, 3H), 0.83 (d,  $J = 6.6$  Hz, 3H), 0.64 (s, 3H).

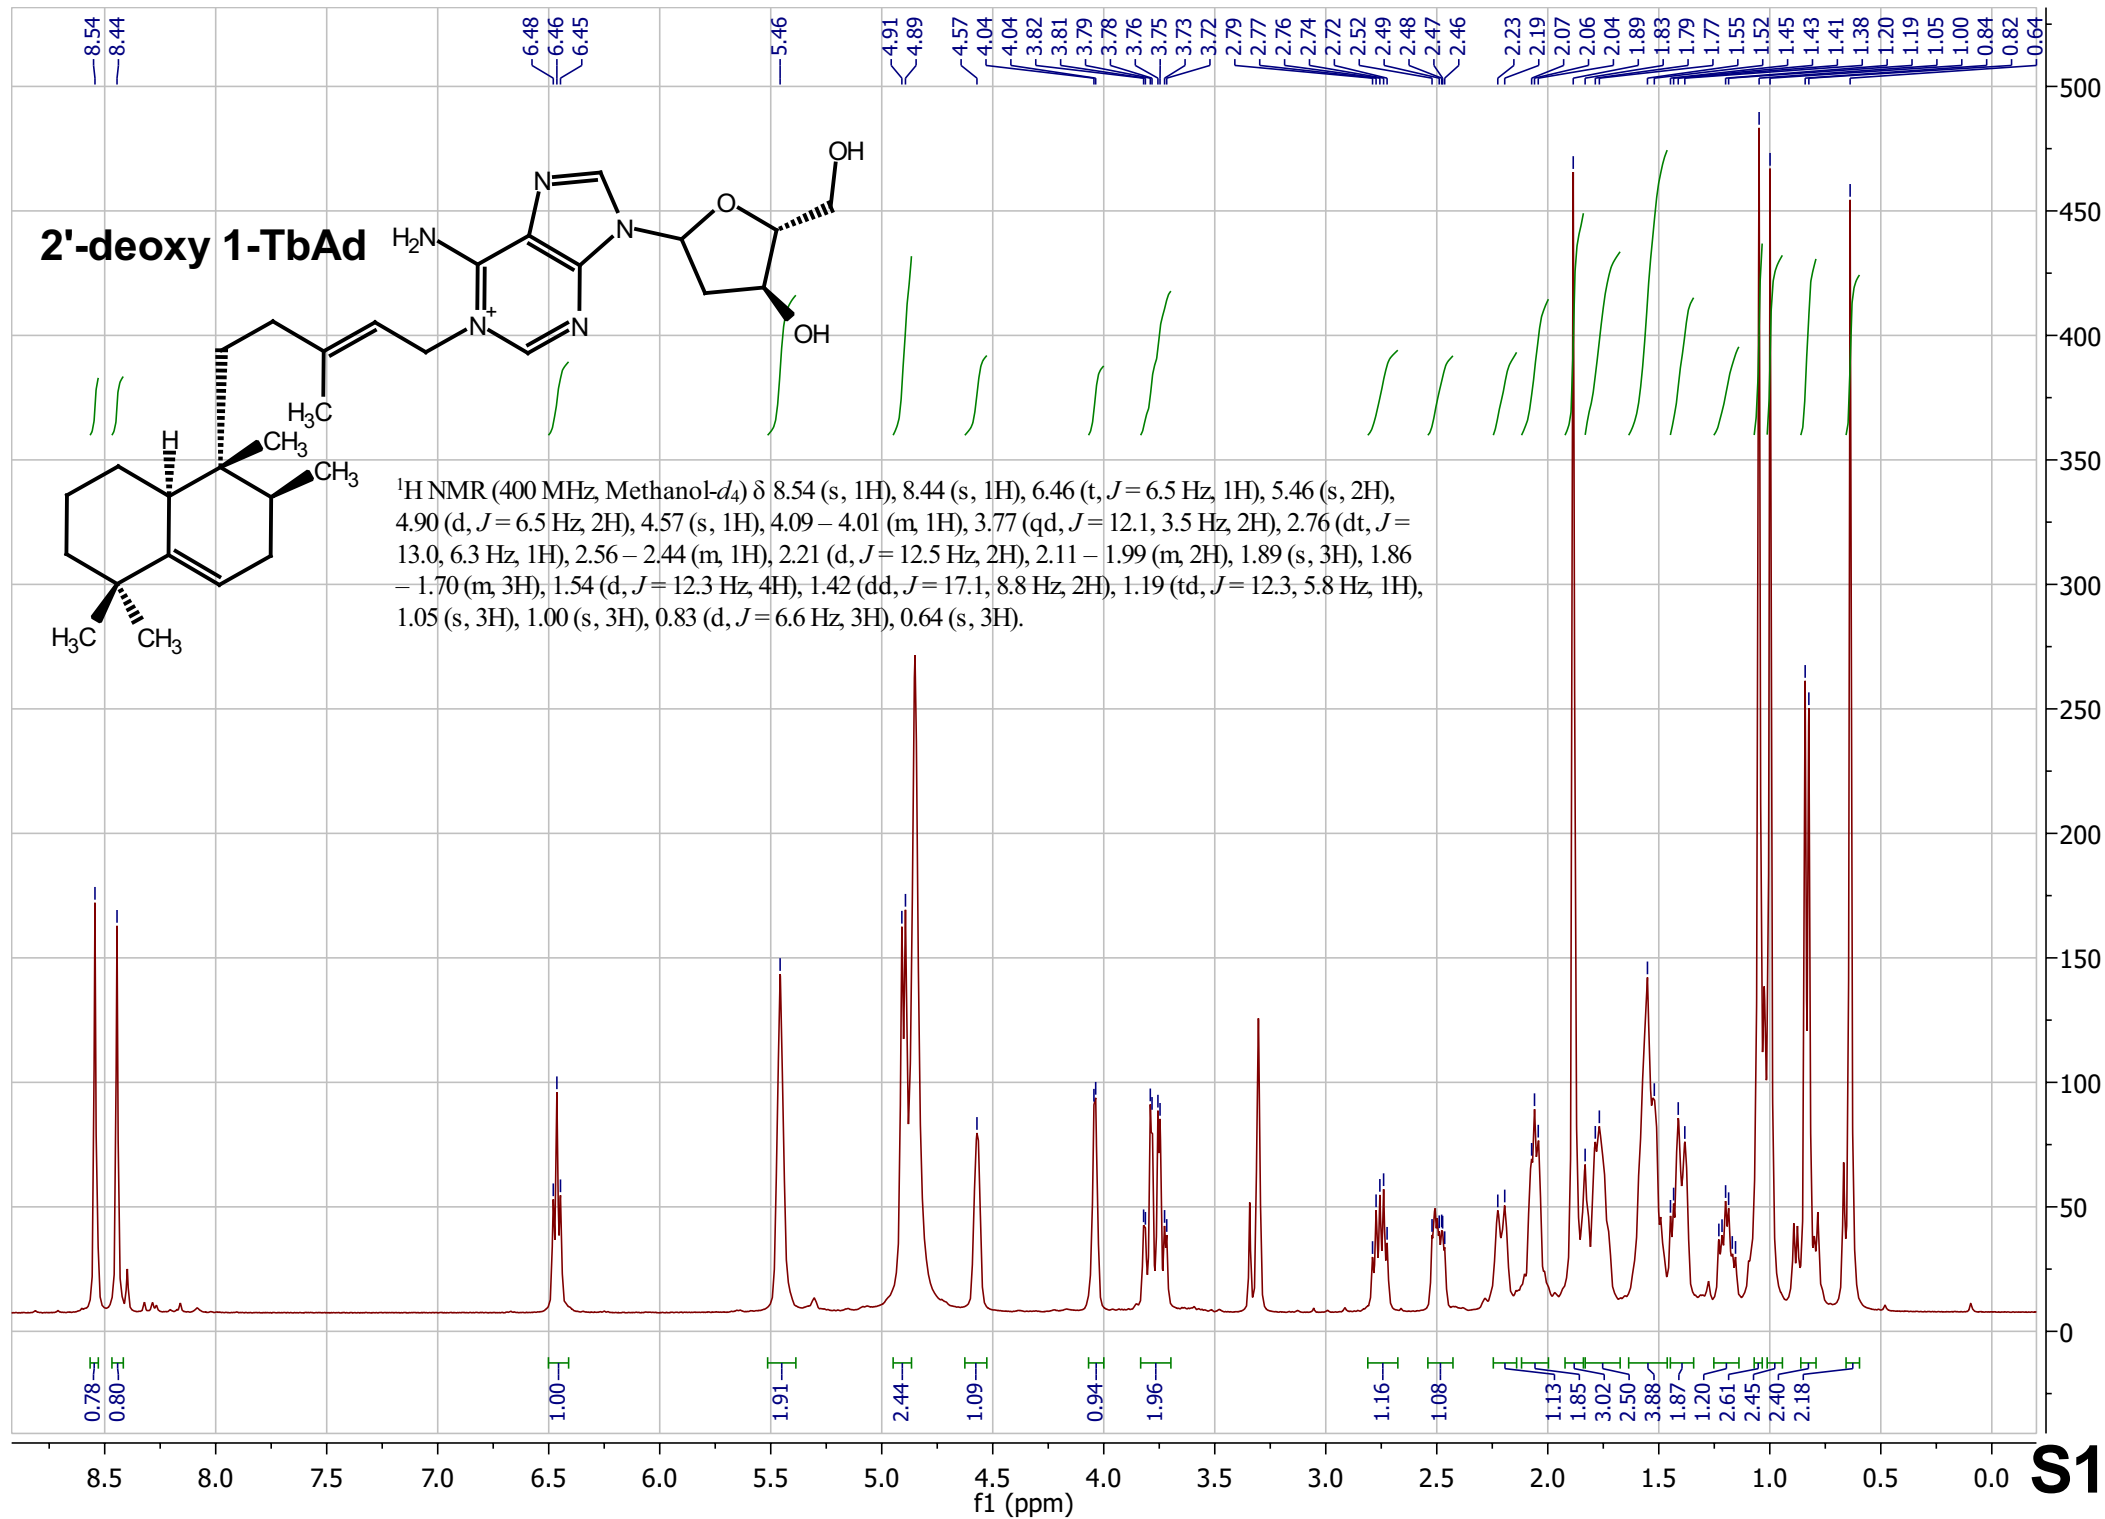

# 2'-deoxy 1-TbAd

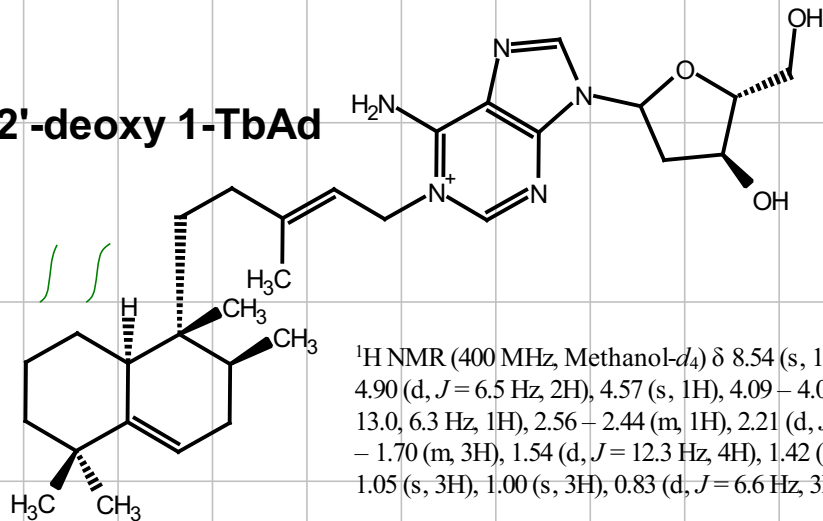

$^1\text{H NMR}$  (400 MHz, Methanol- $d_4$ )  $\delta$  8.54 (s, 1H), 8.44 (s, 1H), 6.46 (t,  $J = 6.5$  Hz, 1H), 5.46 (s, 2H), 4.90 (d,  $J = 6.5$  Hz, 2H), 4.57 (s, 1H), 4.09 – 4.01 (m, 1H), 3.77 (qd,  $J = 12.1, 3.5$  Hz, 2H), 2.76 (dt,  $J = 13.0, 6.3$  Hz, 1H), 2.56 – 2.44 (m, 1H), 2.21 (d,  $J = 12.5$  Hz, 2H), 2.11 – 1.99 (m, 2H), 1.89 (s, 3H), 1.86 – 1.70 (m, 3H), 1.54 (d,  $J = 12.3$  Hz, 4H), 1.42 (dd,  $J = 17.1, 8.8$  Hz, 2H), 1.19 (td,  $J = 12.3, 5.8$  Hz, 1H), 1.05 (s, 3H), 1.00 (s, 3H), 0.83 (d,  $J = 6.6$  Hz, 3H), 0.64 (s, 3H).

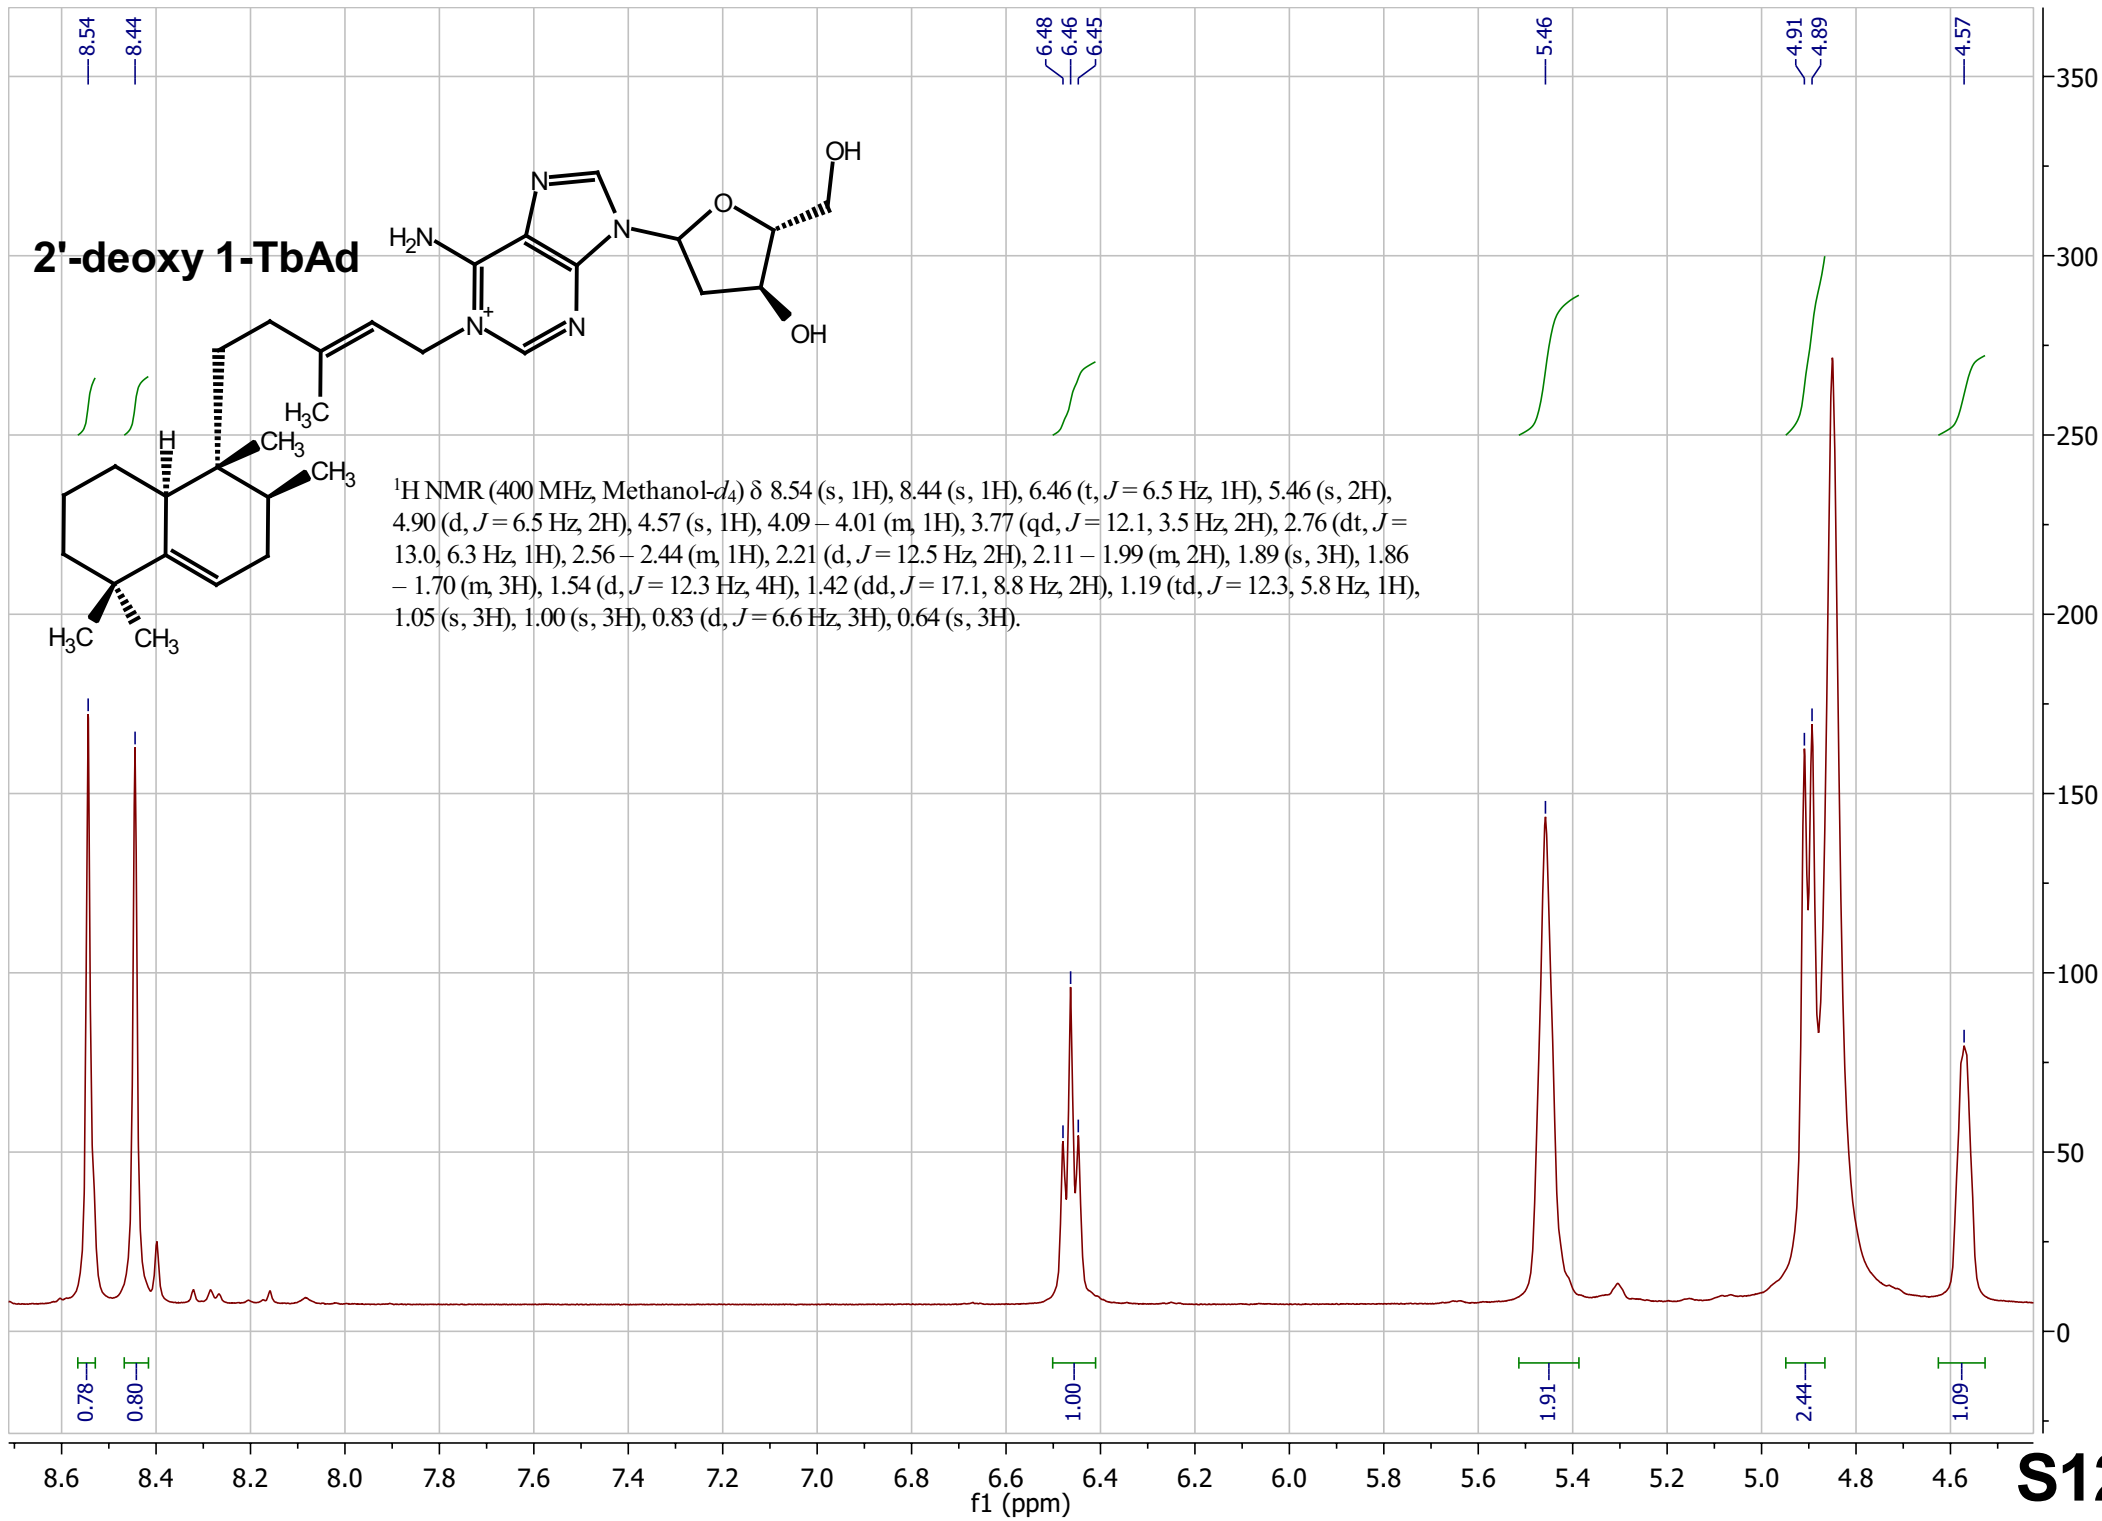

# 2'-deoxy 1-TbAd

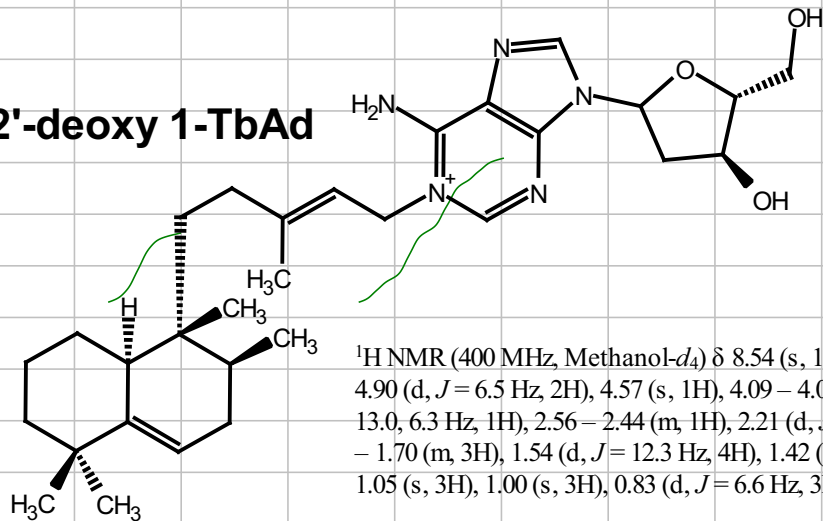

$^1\text{H NMR}$  (400 MHz, Methanol- $d_4$ )  $\delta$  8.54 (s, 1H), 8.44 (s, 1H), 6.46 (t,  $J = 6.5$  Hz, 1H), 5.46 (s, 2H), 4.90 (d,  $J = 6.5$  Hz, 2H), 4.57 (s, 1H), 4.09 – 4.01 (m, 1H), 3.77 (qd,  $J = 12.1, 3.5$  Hz, 2H), 2.76 (dt,  $J = 13.0, 6.3$  Hz, 1H), 2.56 – 2.44 (m, 1H), 2.21 (d,  $J = 12.5$  Hz, 2H), 2.11 – 1.99 (m, 2H), 1.89 (s, 3H), 1.86 – 1.70 (m, 3H), 1.54 (d,  $J = 12.3$  Hz, 4H), 1.42 (dd,  $J = 17.1, 8.8$  Hz, 2H), 1.19 (td,  $J = 12.3, 5.8$  Hz, 1H), 1.05 (s, 3H), 1.00 (s, 3H), 0.83 (d,  $J = 6.6$  Hz, 3H), 0.64 (s, 3H).

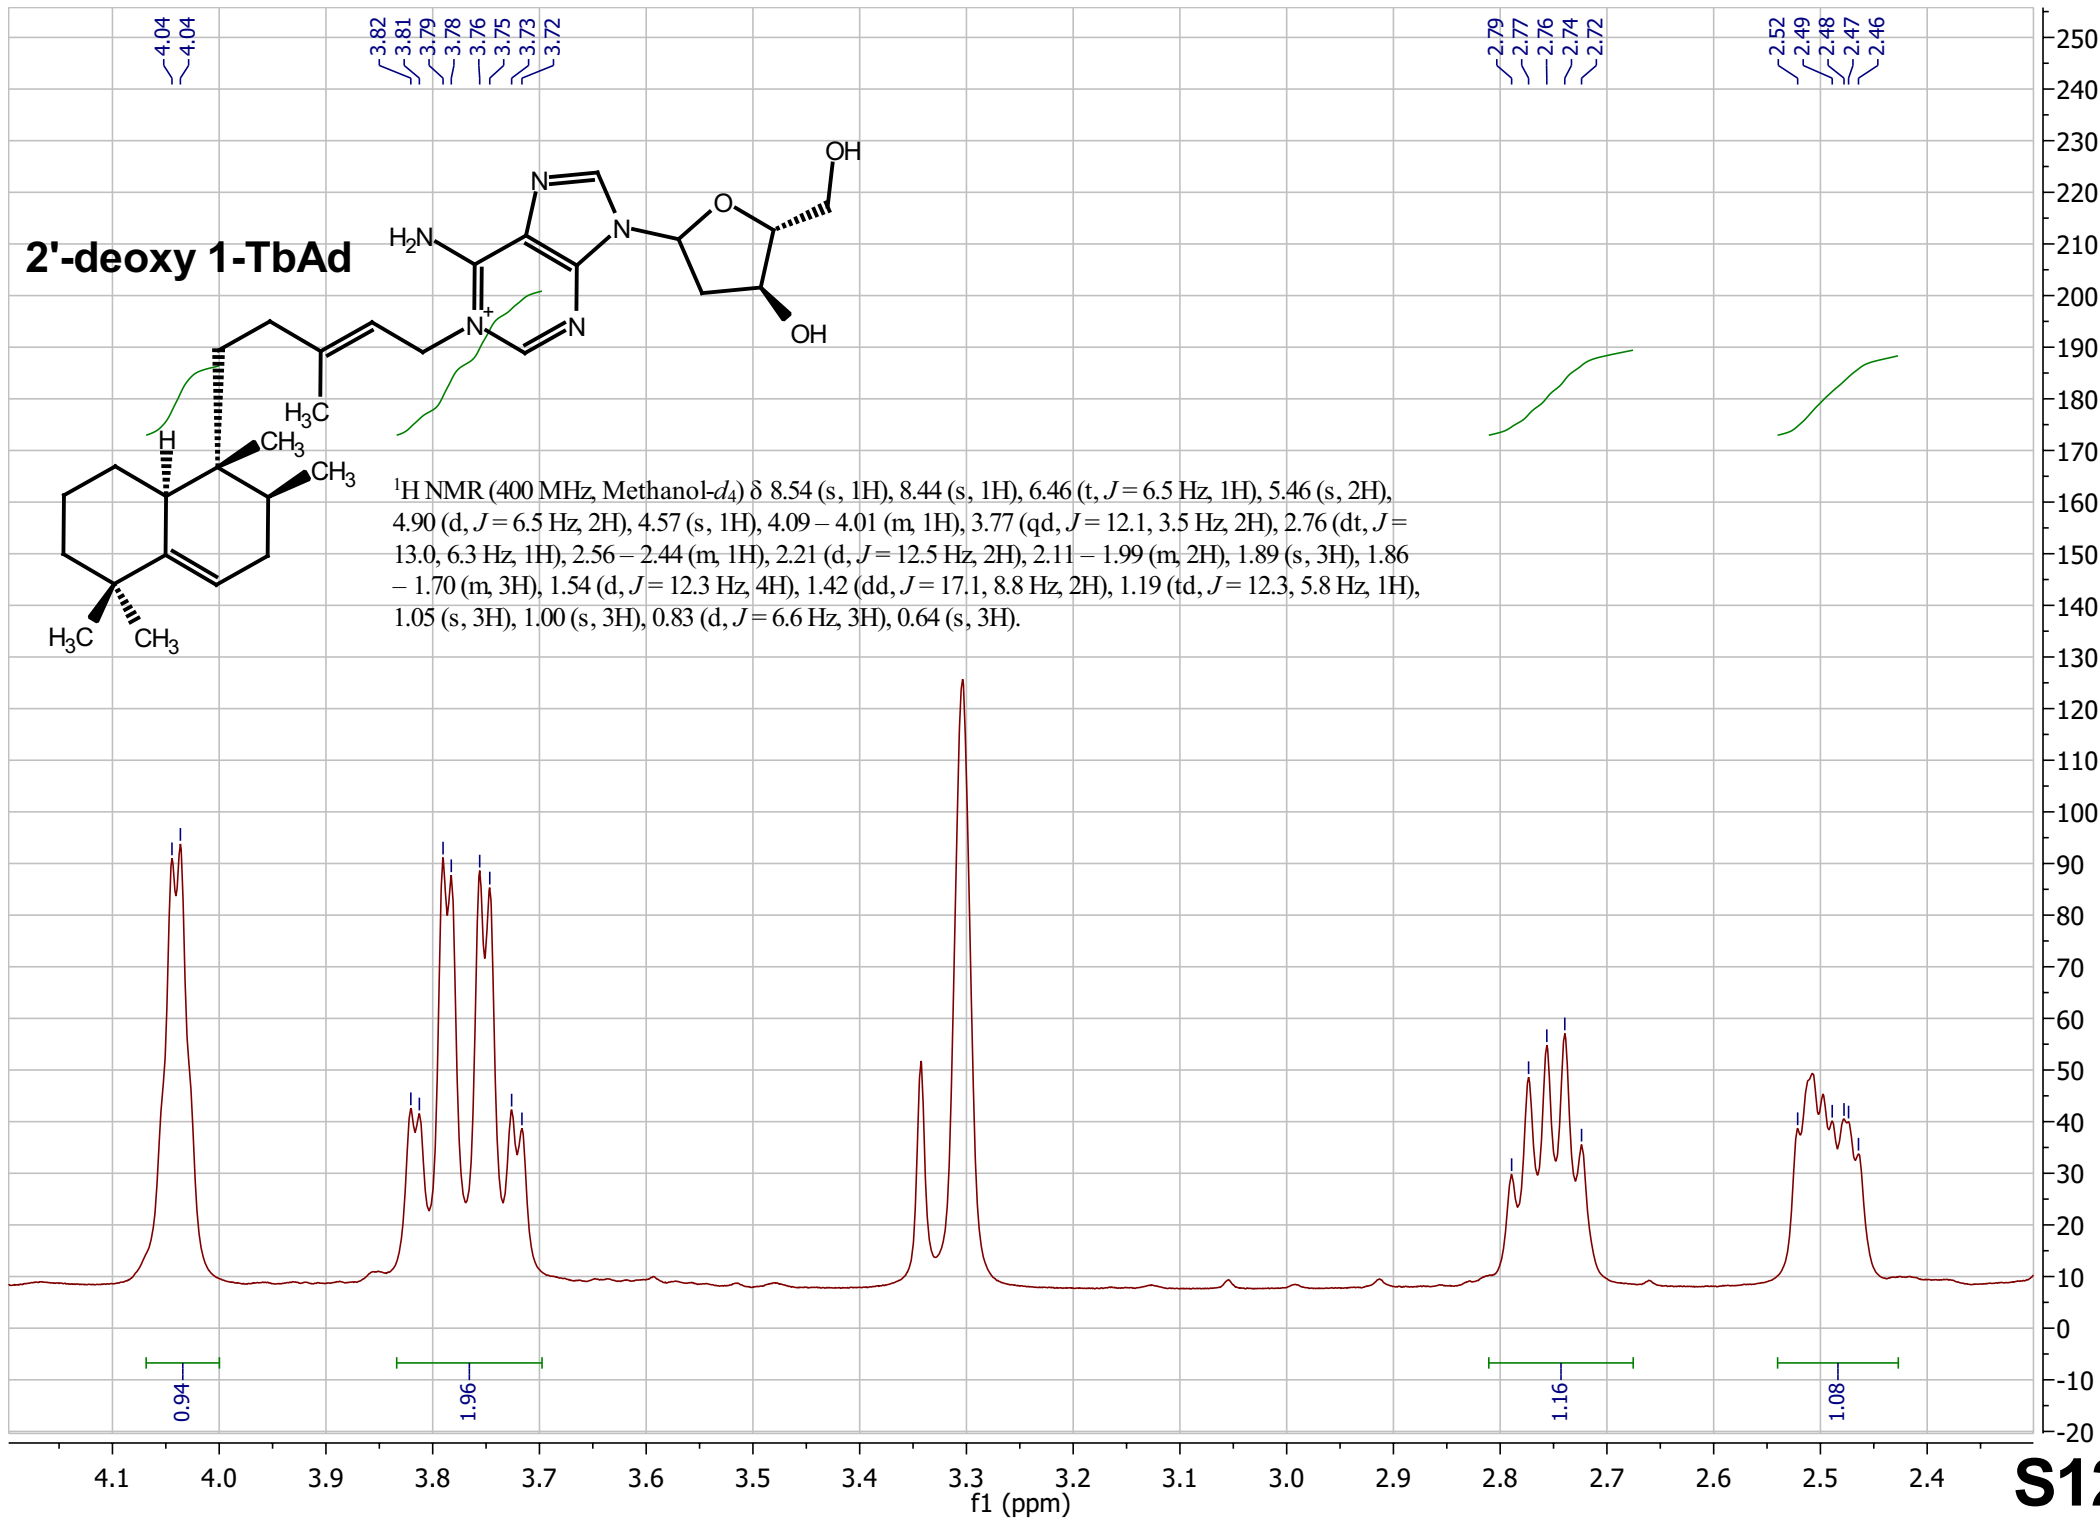

# 2'-deoxy 1-TbAd

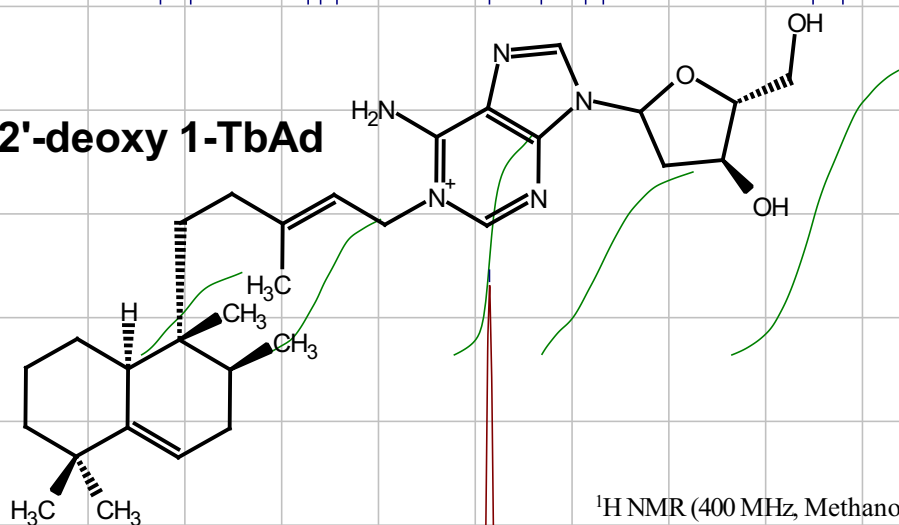

<sup>1</sup>H NMR (400 MHz, Methanol-*d*<sub>4</sub>) δ 8.54 (s, 1H), 8.44 (s, 1H), 6.46 (t, *J* = 6.5 Hz, 1H), 5.46 (s, 2H), 4.90 (d, *J* = 6.5 Hz, 2H), 4.57 (s, 1H), 4.09 – 4.01 (m, 1H), 3.77 (qd, *J* = 12.1, 3.5 Hz, 2H), 2.76 (dt, *J* = 13.0, 6.3 Hz, 1H), 2.56 – 2.44 (m, 1H), 2.21 (d, *J* = 12.5 Hz, 2H), 2.11 – 1.99 (m, 2H), 1.89 (s, 3H), 1.86 – 1.70 (m, 3H), 1.54 (d, *J* = 12.3 Hz, 4H), 1.42 (dd, *J* = 17.1, 8.8 Hz, 2H), 1.19 (td, *J* = 12.3, 5.8 Hz, 1H), 1.05 (s, 3H), 1.00 (s, 3H), 0.83 (d, *J* = 6.6 Hz, 3H), 0.64 (s, 3H).

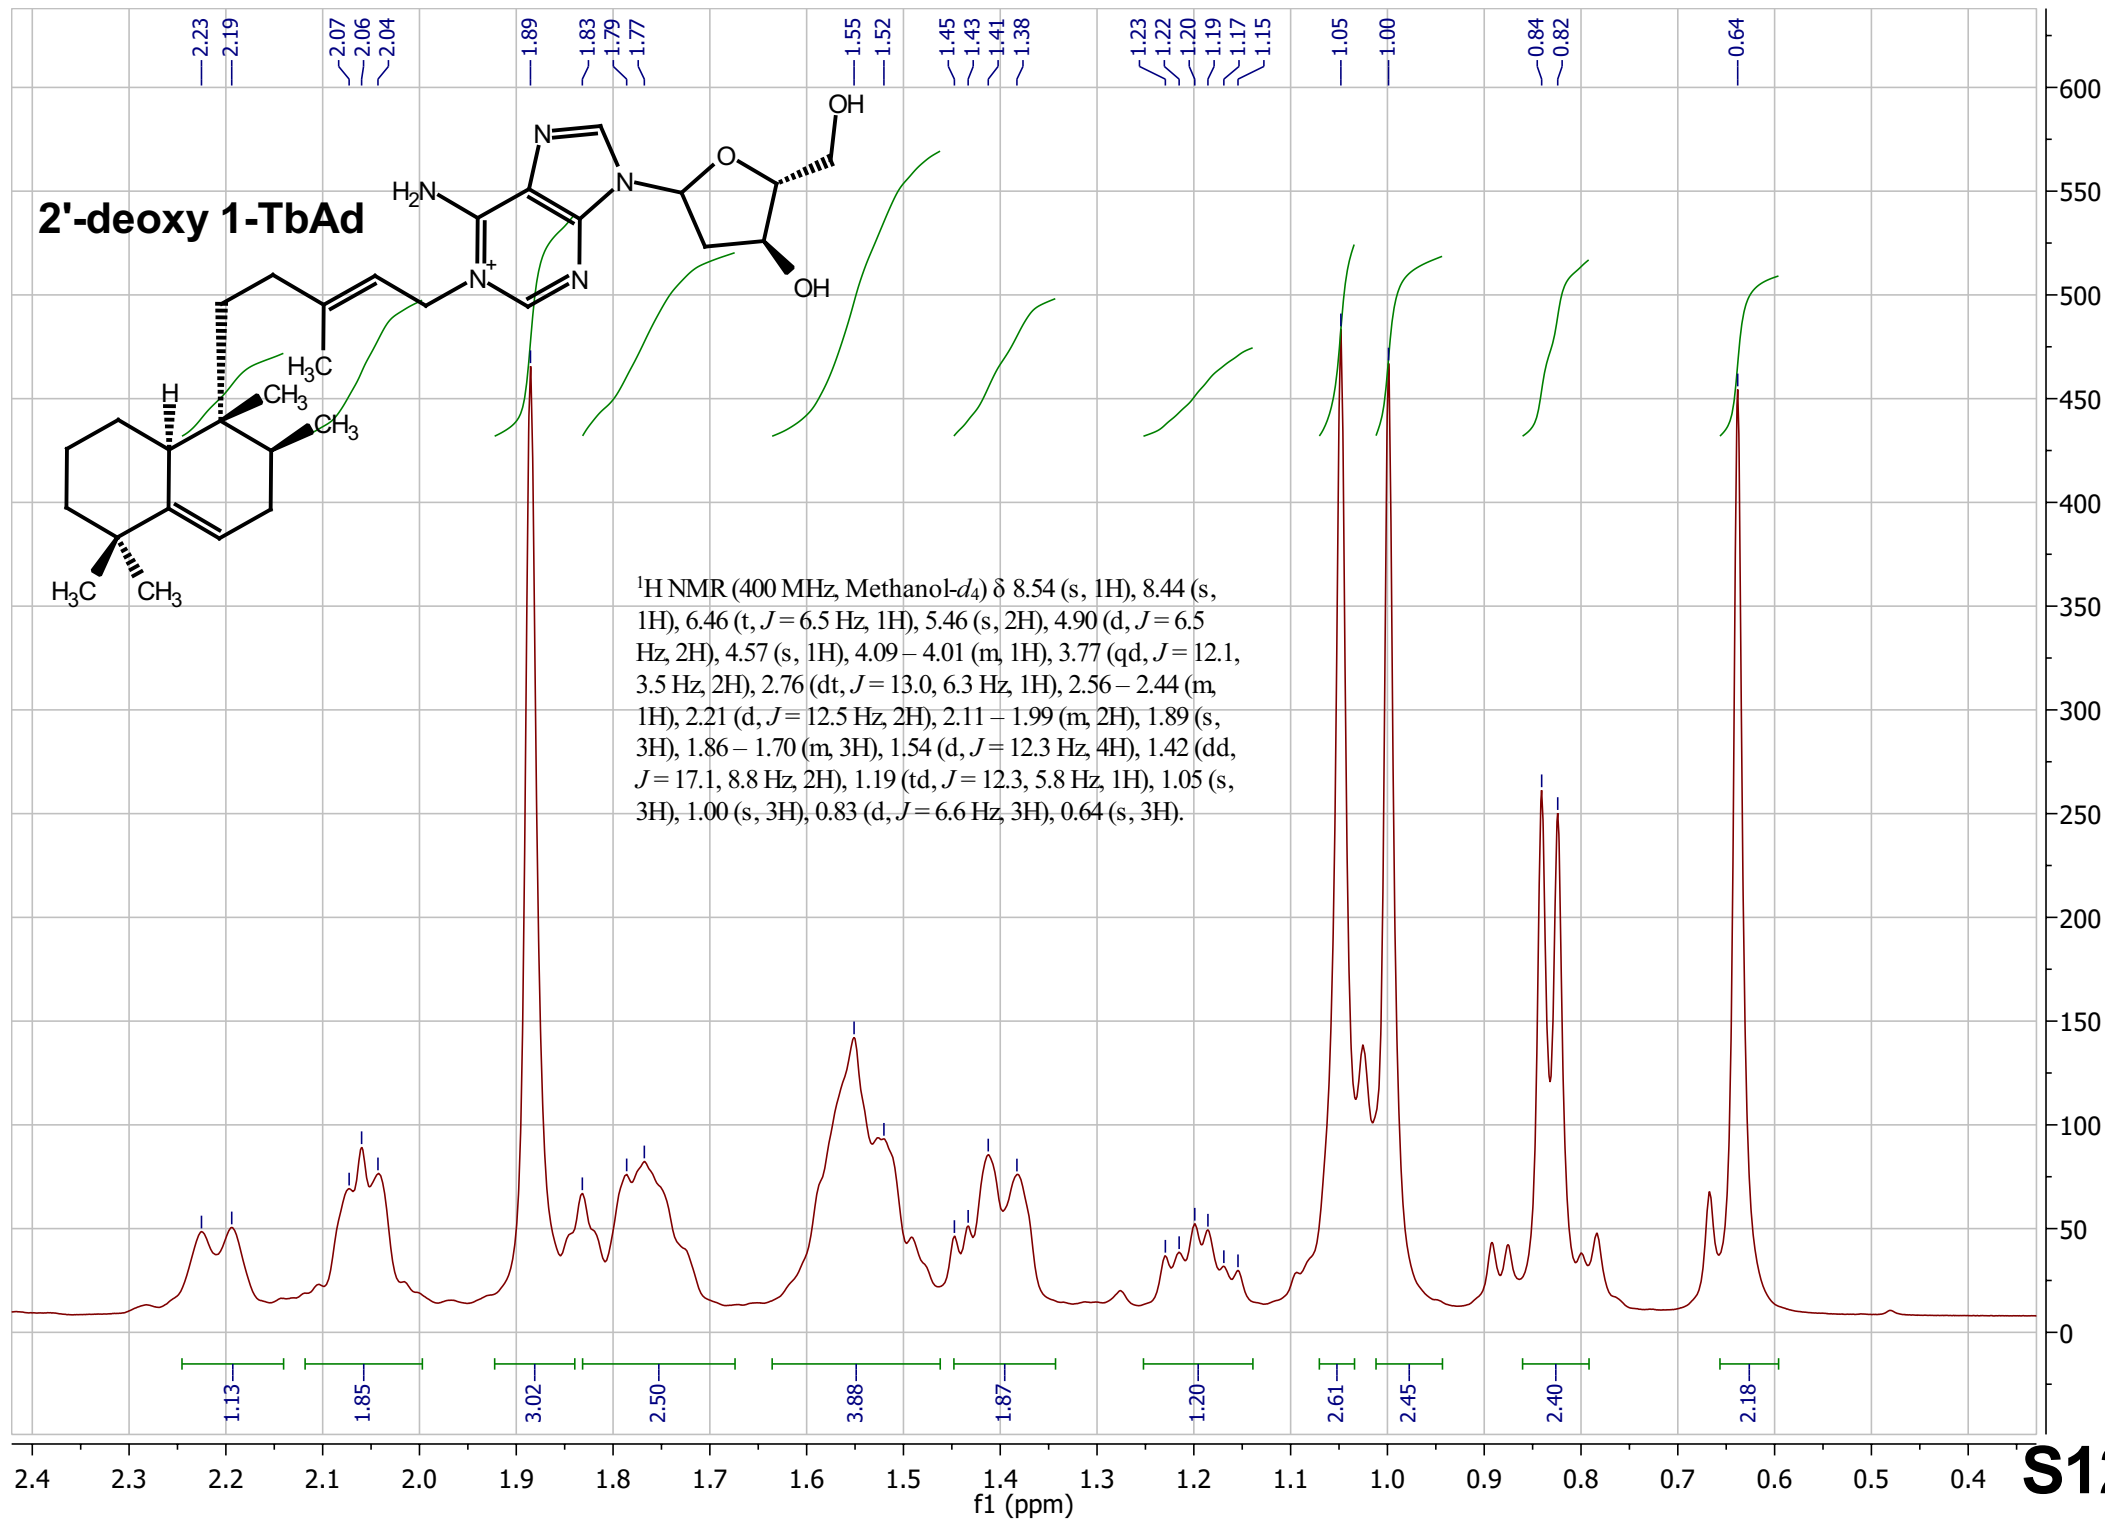

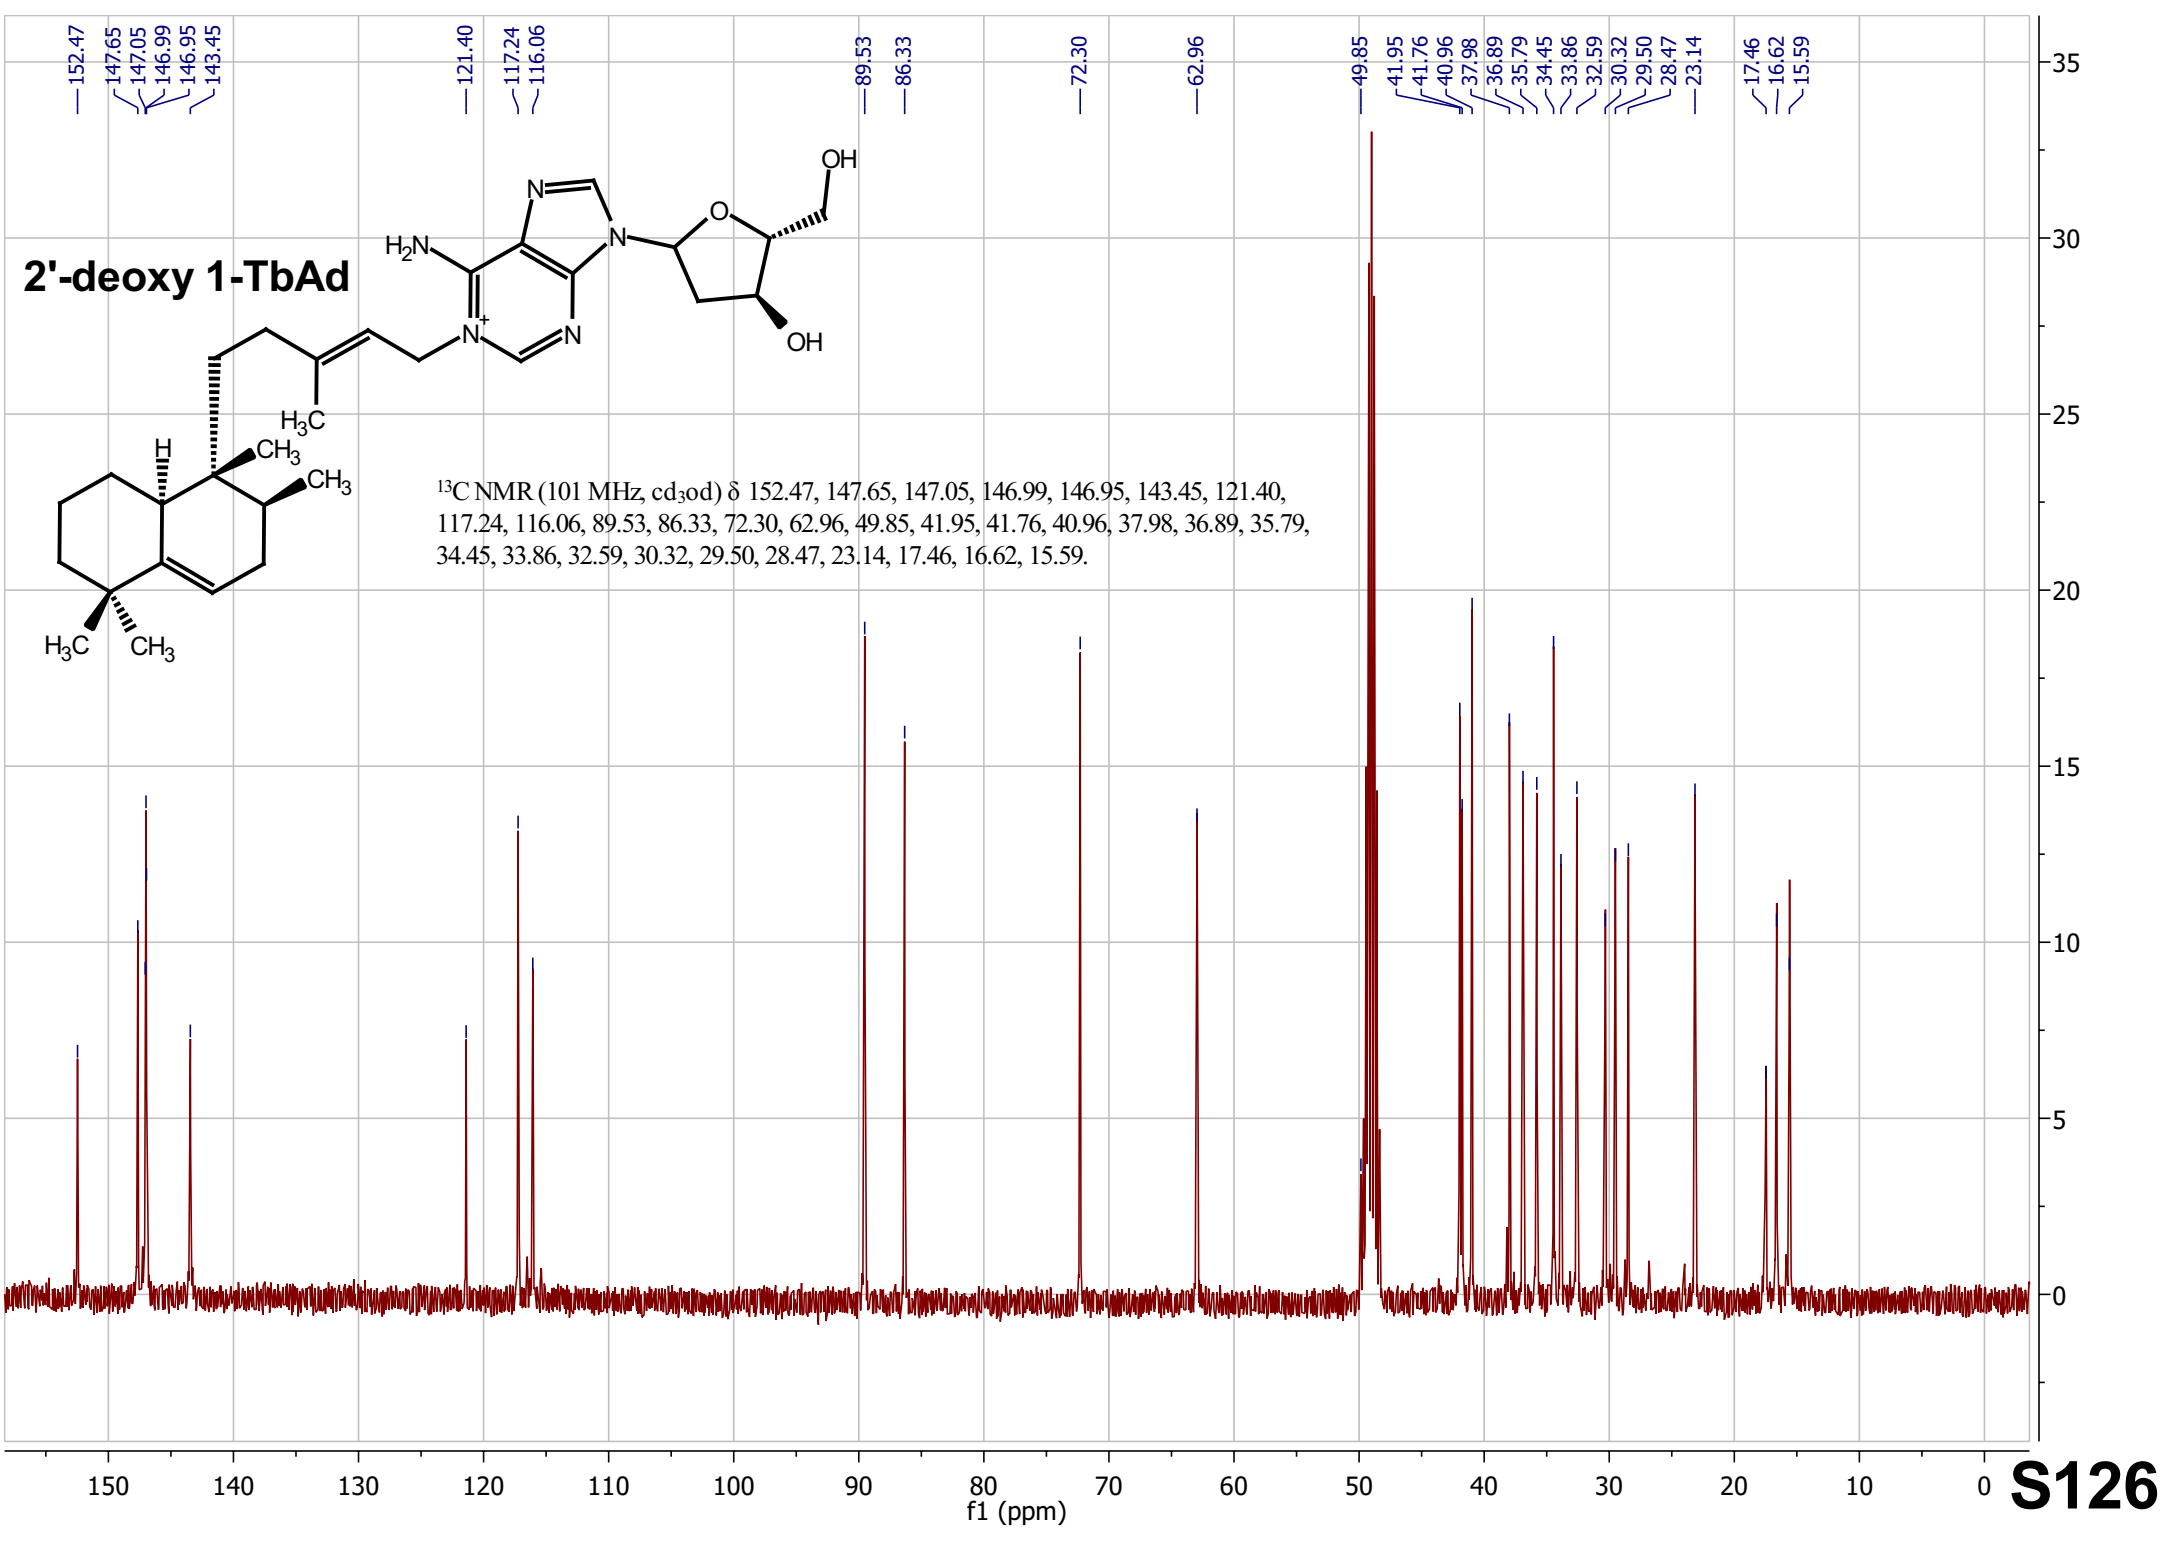

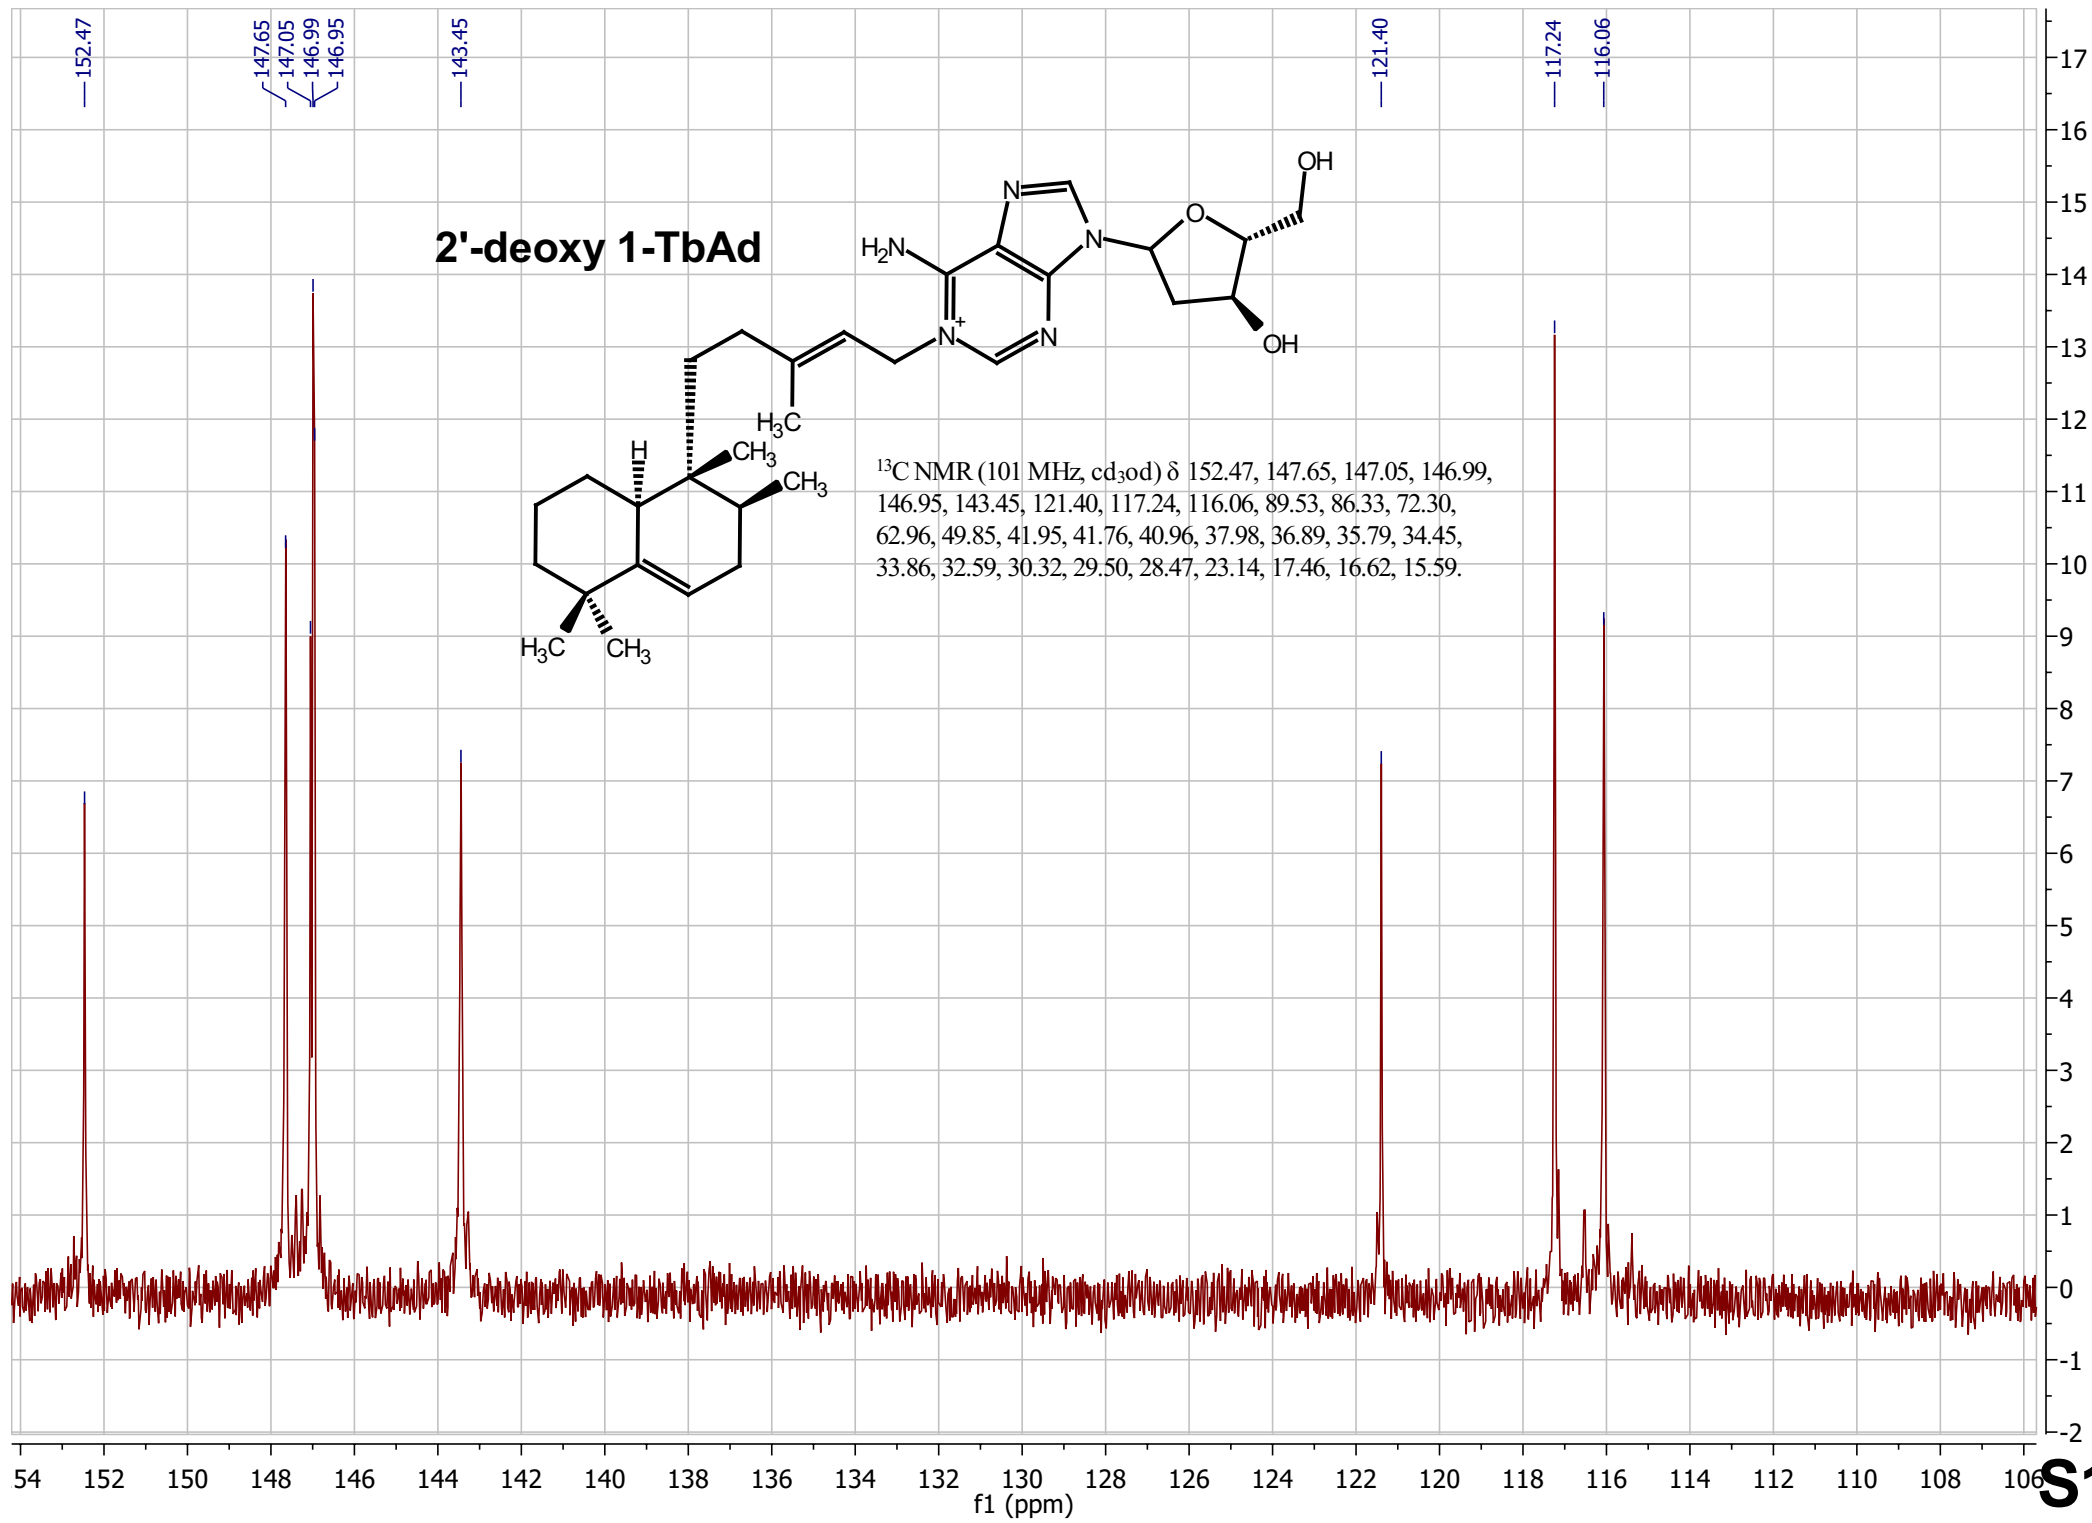

# 2'-deoxy 1-TbAd

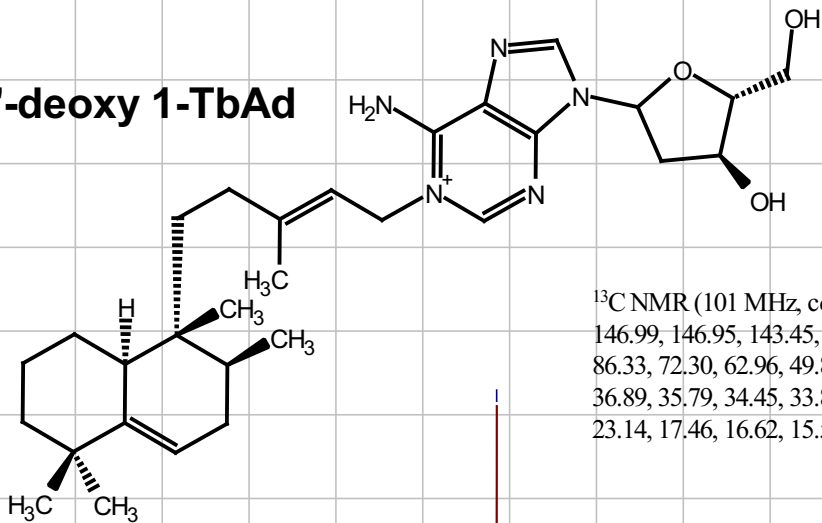

$^{13}\text{C}$  NMR (101 MHz,  $\text{cd}_3\text{od}$ )  $\delta$  152.47, 147.65, 147.05, 146.99, 146.95, 143.45, 121.40, 117.24, 116.06, 89.53, 86.33, 72.30, 62.96, 49.85, 41.95, 41.76, 40.96, 37.98, 36.89, 35.79, 34.45, 33.86, 32.59, 30.32, 29.50, 28.47, 23.14, 17.46, 16.62, 15.59.

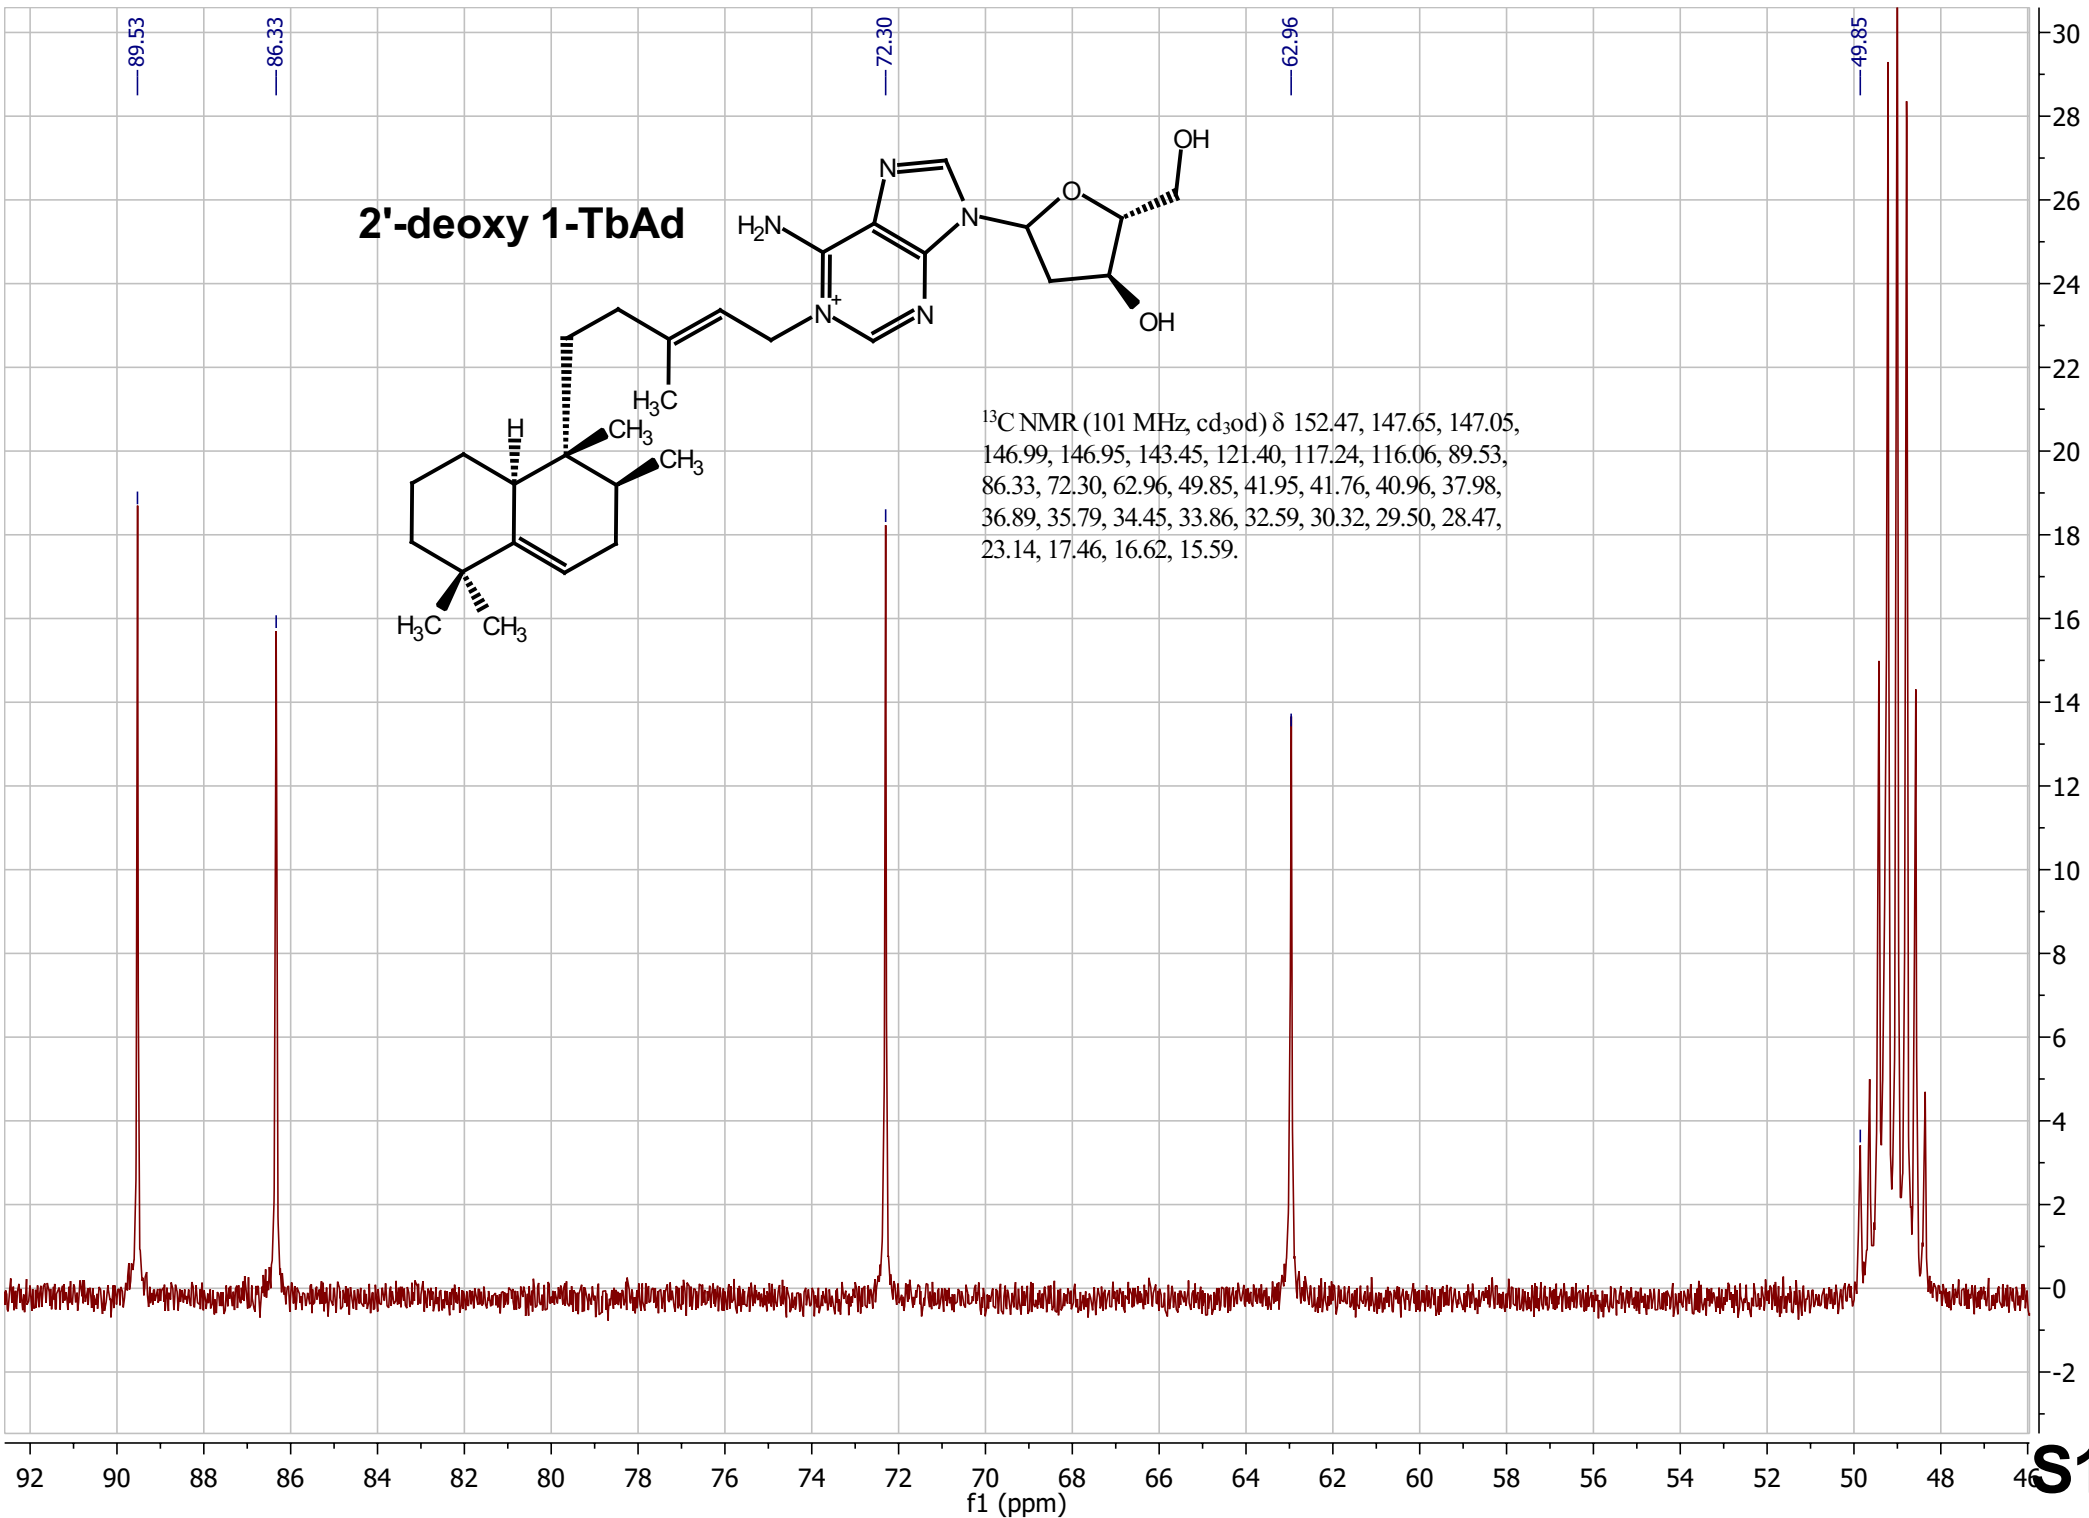



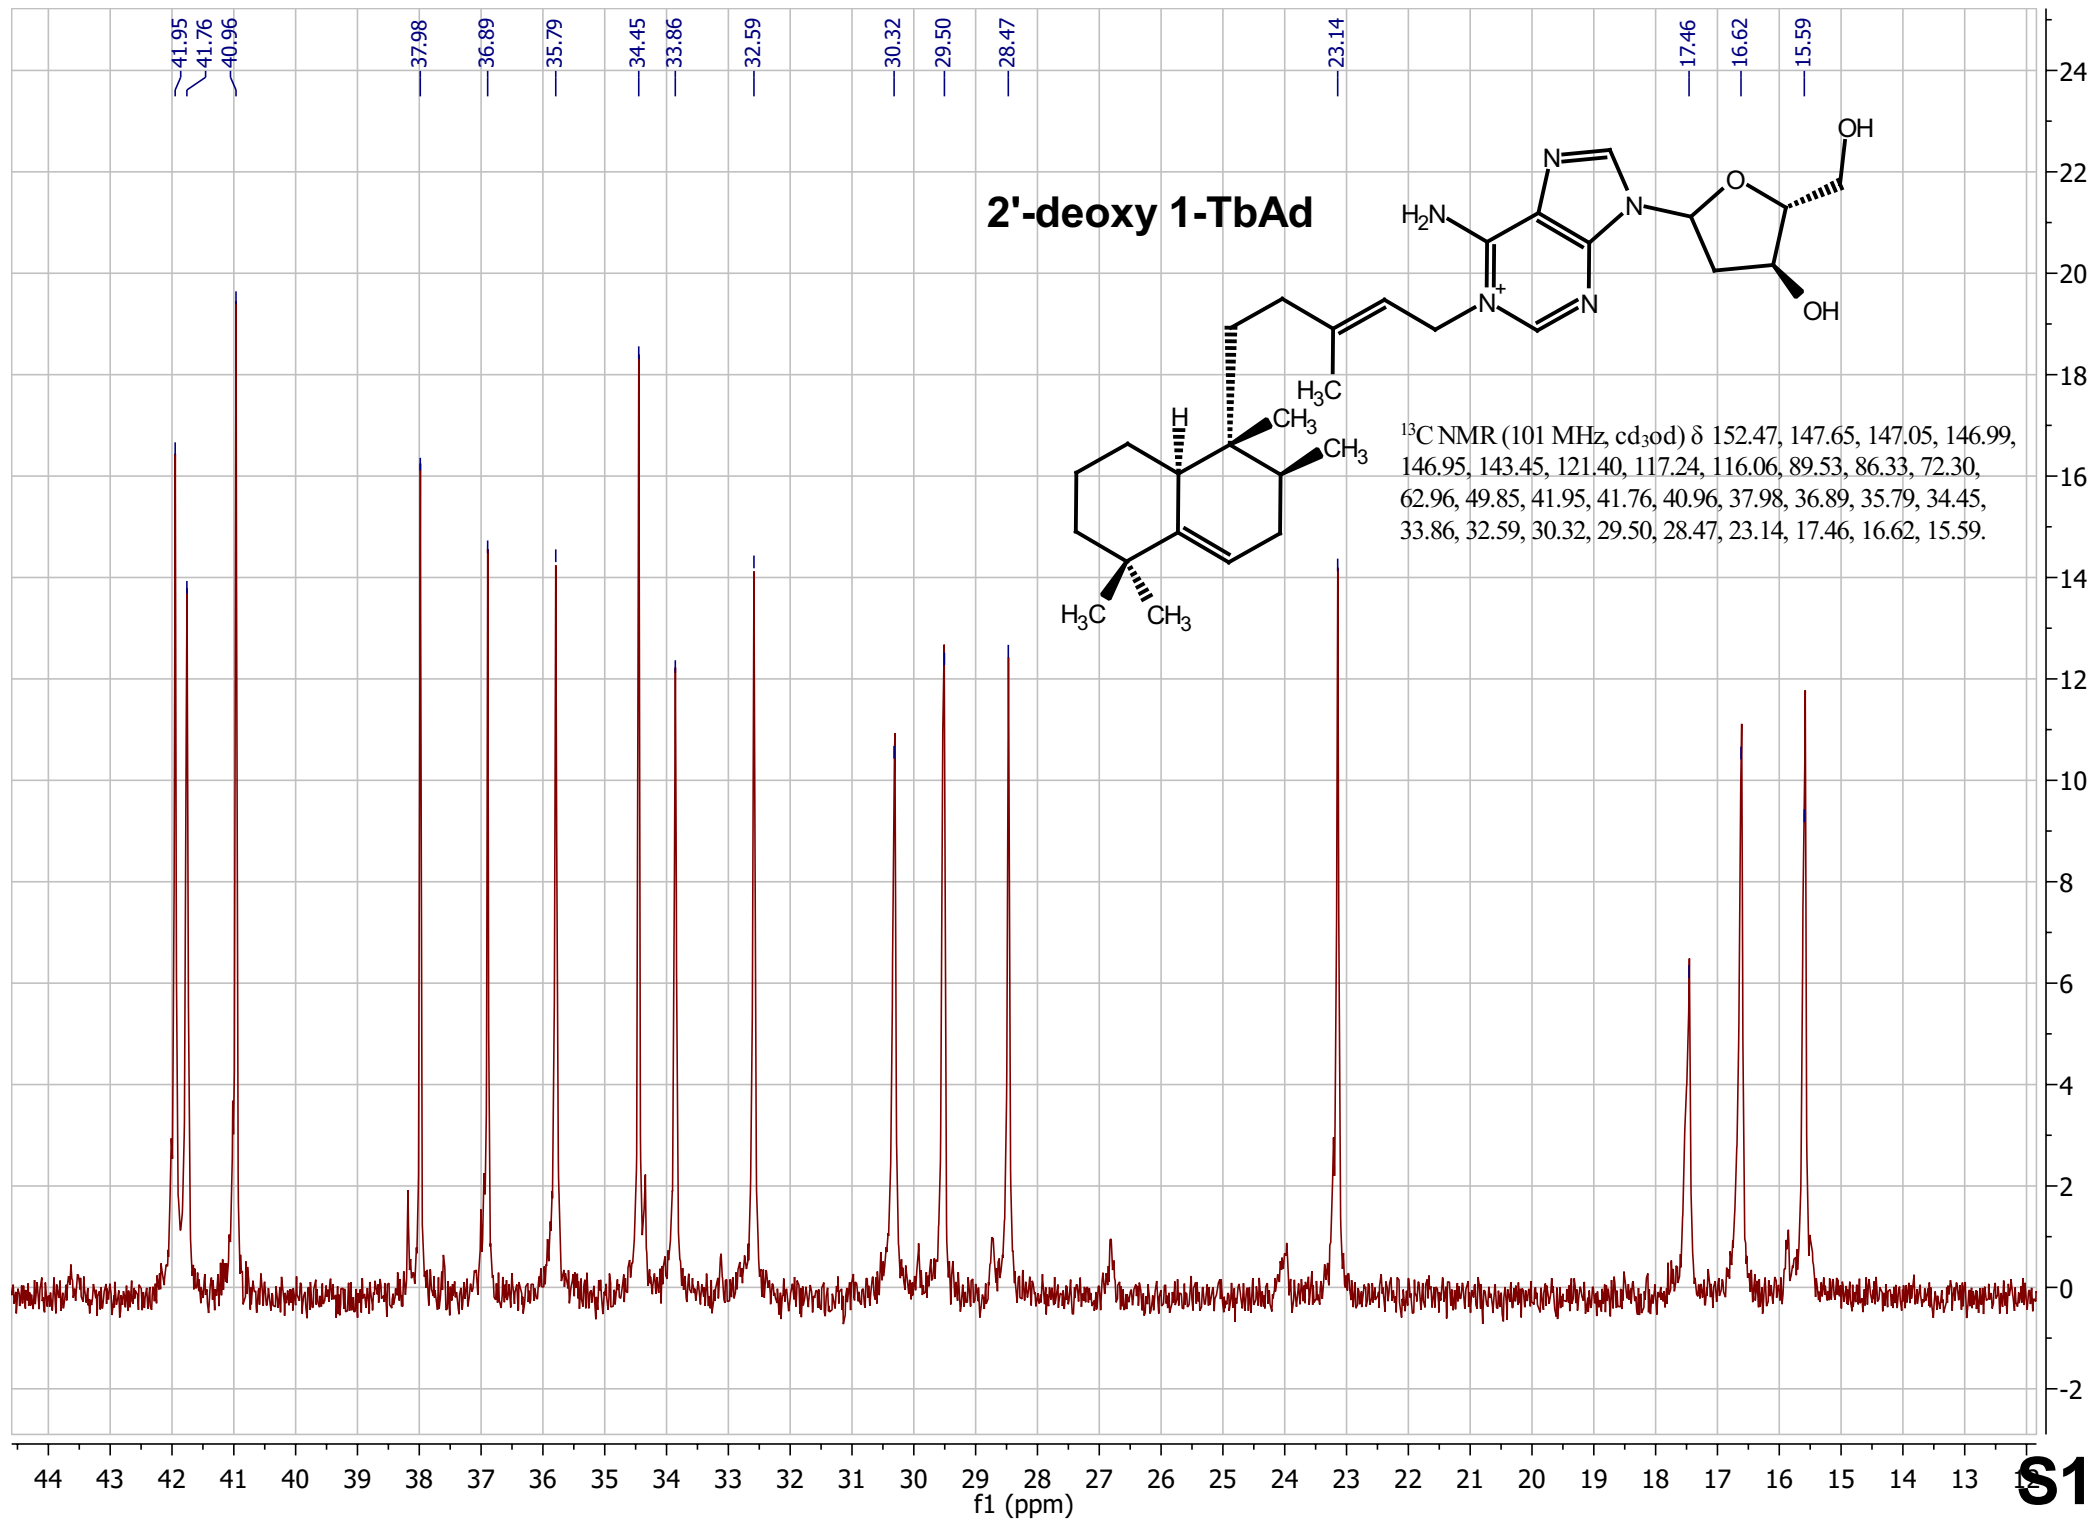

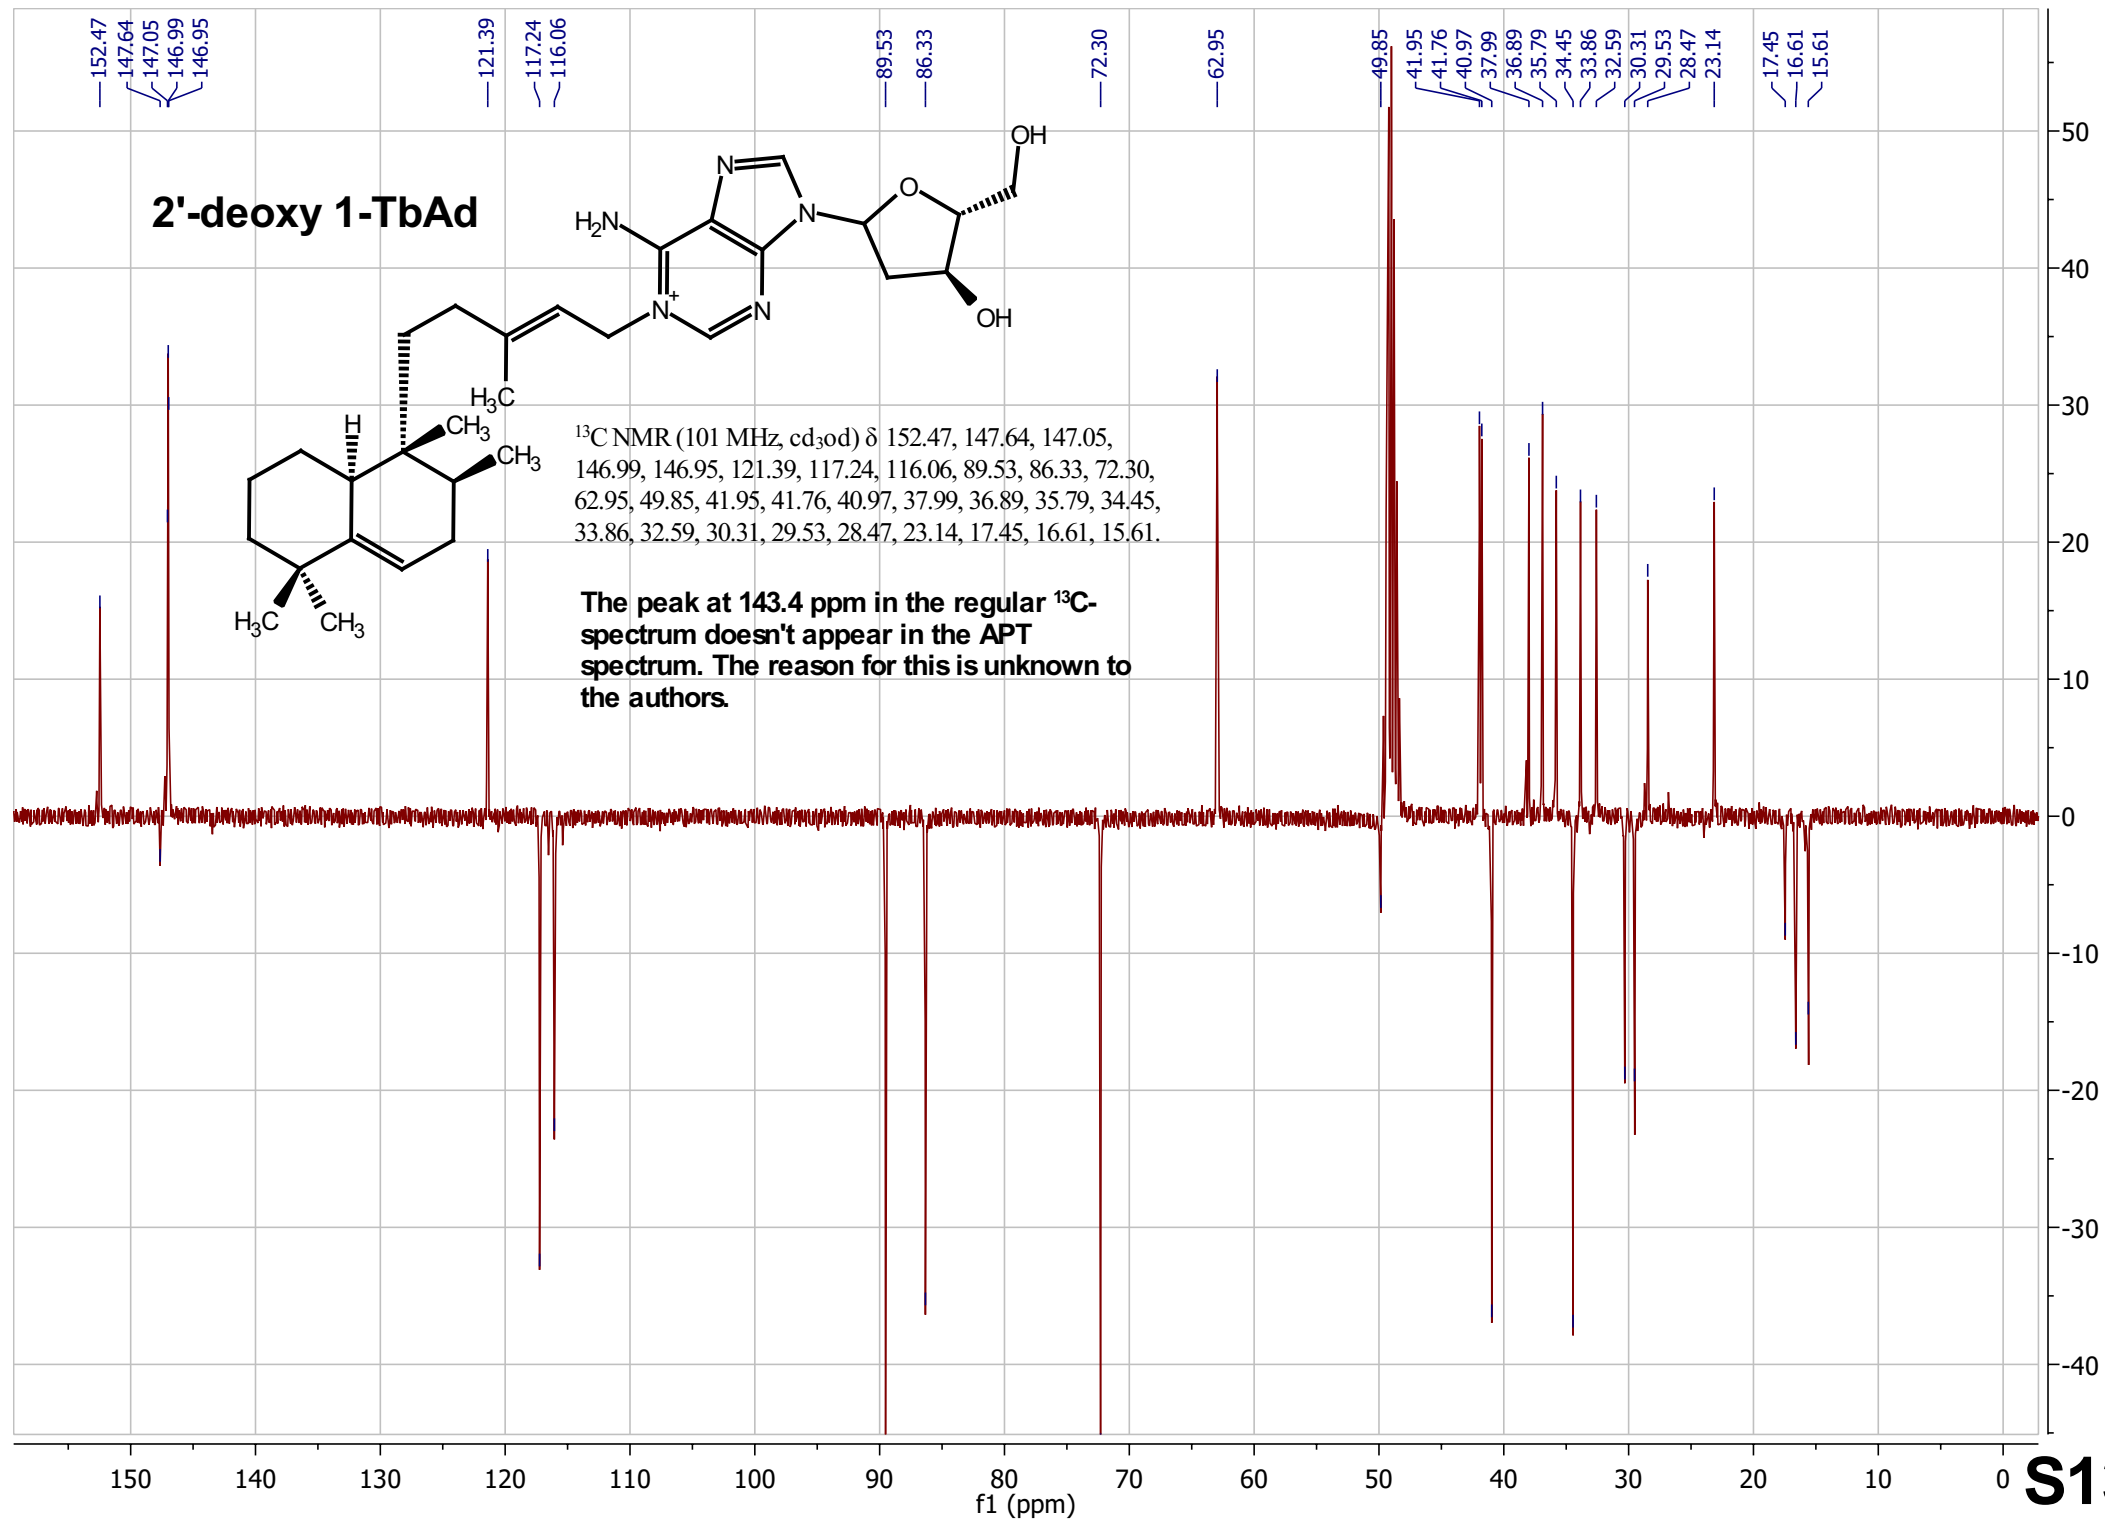

Supplement: NIHMS986430-supplement-Supporting_Information.pdf [file NIHMS986430-supplement-Supporting_Information.pdf]
